# Supplementary material for: Discovery of new pyrimidine-5-carbonitrile derivatives as anticancer agents targeting EGFRWTand EGFRT790M
Source: Royal Society of Chemistry journal article supplement (doi:10.1039/d0ob01557a), 2020-01-01

**Discovery of new pyrimidine-5-carbonitrile derivatives as anticancer agents targeting  
EGFR<sup>WT</sup> and EGFR<sup>T790M</sup>**

Ahmed A. Nasser<sup>a</sup>, Ibrahim H. Eissa<sup>a\*</sup>, Mohamed R. Oun<sup>a</sup>, Mohamed A. El-Zahabi<sup>a\*</sup>, Mohammed  
S. Taghour<sup>a</sup>, Amany Belal<sup>b</sup>, Abdulrahman M. Saleh<sup>a</sup>, Ahmed B.M. Mehany<sup>c</sup>, Hendrik Luesch<sup>d,e</sup>,  
Ahmad E. Mostafa<sup>f</sup>, Wael M Afifi<sup>f,g</sup>, James R. Rocca<sup>d,h</sup>, Hazem A. Mahdy<sup>a\*</sup>

<sup>a</sup> Pharmaceutical Medicinal Chemistry & Drug Design Department, Faculty of Pharmacy (Boys), Al-Azhar University, Cairo 11884, Egypt.

<sup>b</sup> Medicinal Chemistry Department, Faculty of Pharmacy, Beni-Suef University, Beni-Suef 62514, Egypt.

<sup>c</sup> Zoology Department, Faculty of Science, Al-Azhar University, Cairo 11884, Egypt.

<sup>d</sup> Department of Medicinal Chemistry, University of Florida, Gainesville, FL 32610, USA.

<sup>e</sup> Center for Natural Products, Drug Discovery and Development (CNP3D), University of Florida, Gainesville, FL 32610, USA.

<sup>f</sup> Pharmacognosy and Medicinal Plants Dept., Faculty of Pharmacy (Boys), Al-Azhar University, Cairo, 11884, Egypt.

<sup>g</sup> Department of Pharmacognosy, Faculty of Pharmacy, Sinai University, Ismailia, Egypt.

<sup>h</sup> AMRIS Facility, McKnight Brain Institute, University of Florida, Gainesville, FL 32610, USA.

**\* Corresponding authors:**

**Ibrahim H. Eissa**

Pharmaceutical Medicinal Chemistry & Drug Design Department, Faculty of Pharmacy (Boys), Al-Azhar University, Cairo 11884, Egypt

**Email:** [Ibrahimeissa@azhar.edu.eg](mailto:Ibrahimeissa@azhar.edu.eg)

Mohamed A. El-Zahabi

Pharmaceutical Medicinal Chemistry & Drug Design Department, Faculty of Pharmacy (Boys), Al-Azhar University, Cairo 11884, Egypt

**Email:** [malzahaby@yahoo.com](mailto:malzahaby@yahoo.com)

**Hazem A. Mahdy**

Pharmaceutical Medicinal Chemistry & Drug Design Department, Faculty of Pharmacy (Boys), Al-Azhar University, Cairo 11884, Egypt

**Email:** [Hazem\\_hady2001@azhar.edu.eg](mailto:Hazem_hady2001@azhar.edu.eg)

**Content**

|   |                                                                  |
|---|------------------------------------------------------------------|
| 1 | Reported reactions between nitrile group and cysteine amino acid |
| 2 | Docking studies                                                  |
| 3 | ADMET studies                                                    |
| 4 | Spectral analysis                                                |

#### 1- Reported reactions between nitrile group and cysteine amino acid

a- **Fig. 1** was reported by Montanari *et al* [1] showing two possible mechanisms for the inhibition reaction. In the first proposed mechanism, the protonation of N1 occurs concertedly with the nucleophilic attack of the thiolate anion. The second proposed mechanism is the nucleophilic addition and proton transfer in a stepwise mechanism, where the thiolate group of Cys25 attacks the carbon atom of the nitrile group first to form a covalent bond.

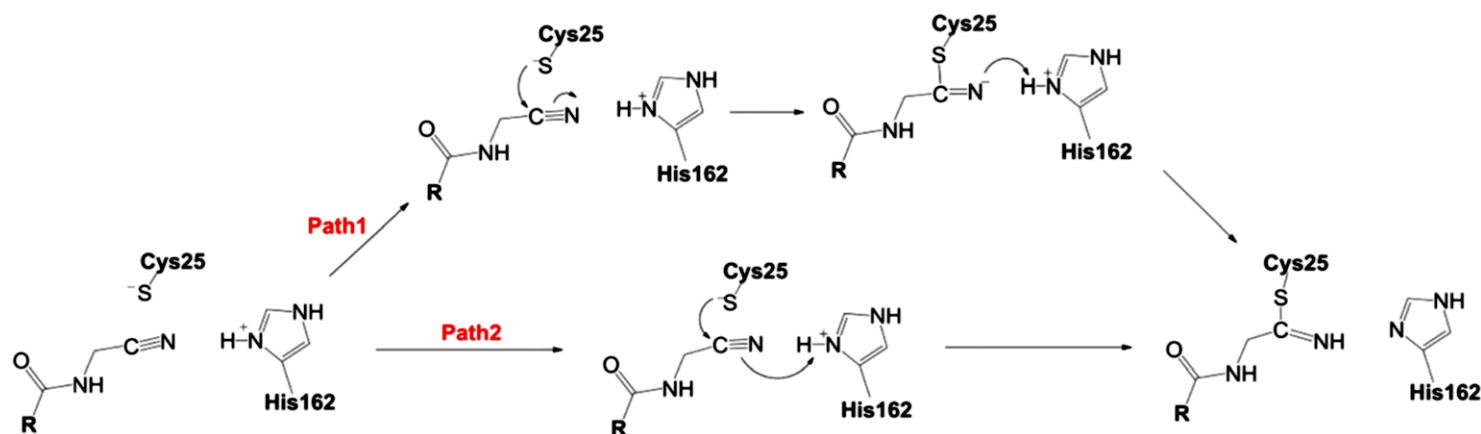

Fig. 1: Possible reaction mechanisms of nitrile derivatives with cysteine amino acid.

b- **Fig. 2** was reported by Liang *et al* [2] showing the condensation reaction between cysteine and 2-cyanobenzothiazole that occurs *in vitro* and in living cells under the control of pH.

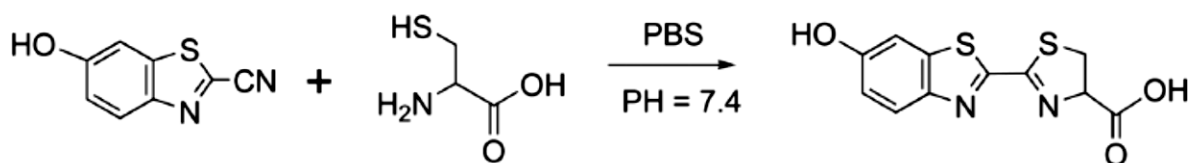

**Fig. 2:** the condensation reaction between cysteine and 2-cyanobenzothiazole pH = 7.4.

- c- **Fig. 3** was reported by Zheng *et al* [3] showing the mechanism of condensation reaction between L-cysteine and the cyano group of 2-cyano-6-aminobenzothiazole to yield Aminoluciferin

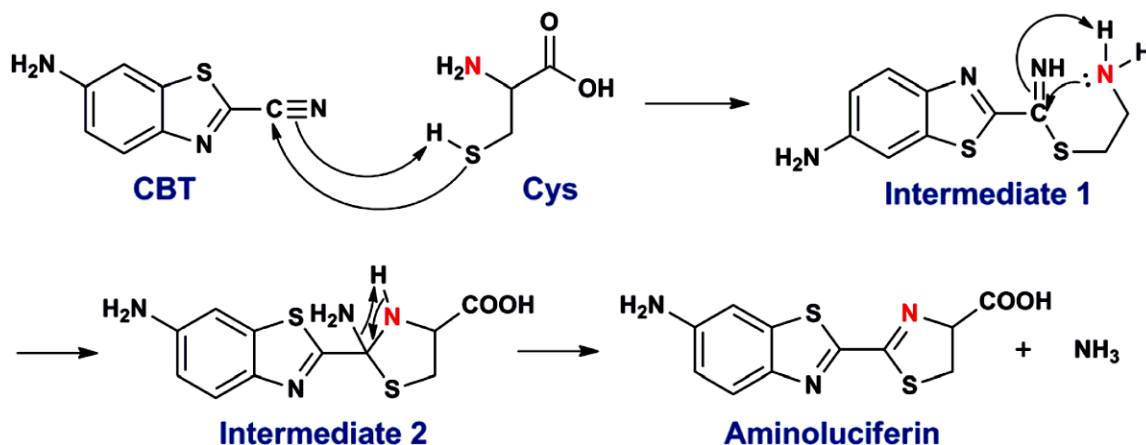

**Fig. 3:** Proposed reaction mechanism between 2-cyano-6-aminobenzothiazole and L-cysteine.

## 2. In silico studies

### A) Docking studies

- The binding mode of compound **16b** against EGFR<sup>WT</sup>

The binding mode of compound **16b** was similar to that of the reference ligand, erlotinib. It gave affinity value of -9.55 kcal/mol. The pyrimidine-5-carbonitrile moiety was embedded in the adenine pocket of the EGFR<sup>WT</sup> forming a hydrophobic interaction with Leu694. The sulfamethazine moiety occupied the hydrophobic pocket I forming a hydrophobic bond with Met742, Leu834, Leu837, and Cys751. Also, it formed two hydrogen bonds with Thr830 and Thr766 with a distance of 2.10 and 1.92 Å, respectively. Moreover, the phenyl group at position-4 occupied the hydrophobic region II. (**Fig 1**).

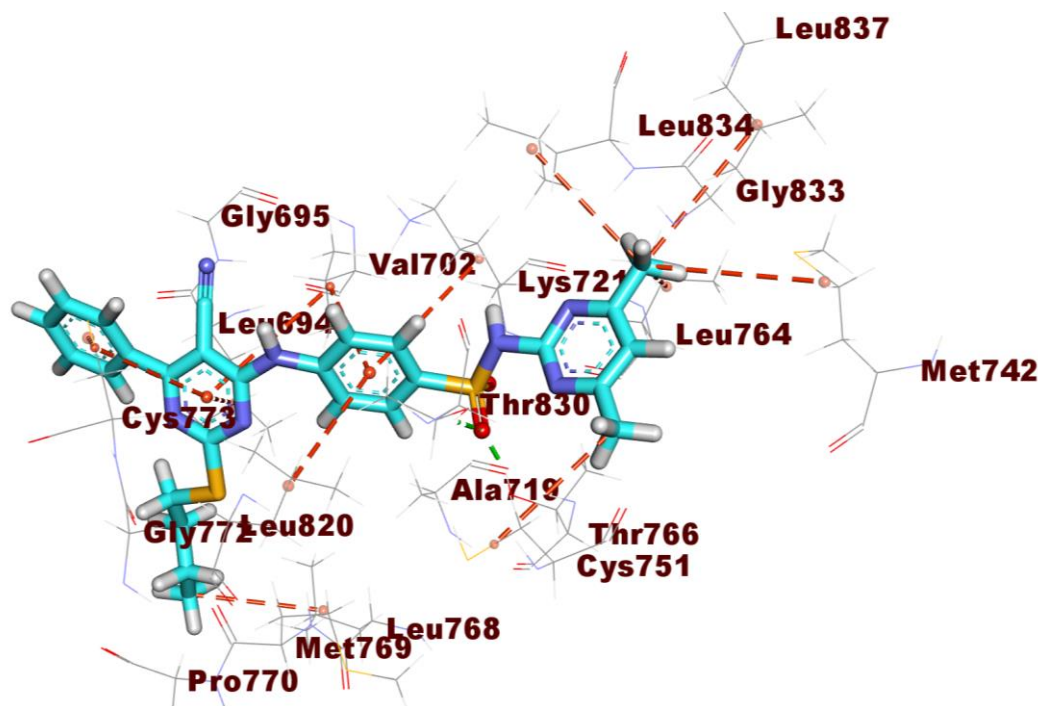

**Fig. 1:** Compound **16b** docked into the active site of EGFR<sup>WT</sup> formed two hydrogen bonds (green) with Thr830 and Thr766 residues. The pi interactions are represented in orange lines.

- **The binding mode of compound **16b** against EGFR<sup>T790M</sup>**

The binding mode of compound **16b** was similar to that of the reference ligand, TAK-285. It gave affinity value of -6.74 kcal/mol. The pyrimidine-5-carbonitrile moiety was embedded in the adenine pocket. The sulfur atom of thiobutyl moiety formed a hydrogen bond with Thr854. The sulfamethazine moiety occupied the hydrophobic pocket I forming a hydrophobic bond with Lys728, Leu718, and Leu844. Moreover, the phenyl group at position-4 occupied the hydrophobic region II. (**Fig. 2**).



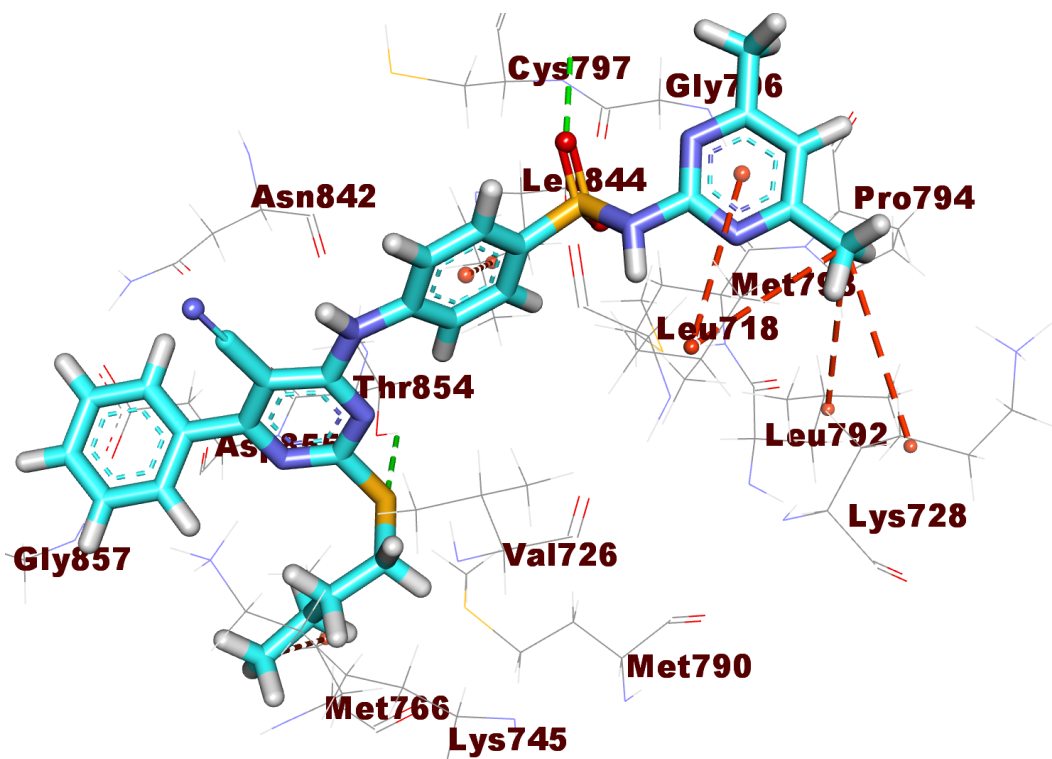

**Fig. 2:** Binding of compound **16b** with EGFR<sup>T790M</sup>, the hydrogen bonds are represented in green dashed lines and the pi interactions are represented in orange dashed lines.

- **The binding mode of compound 10<sub>a</sub> against EGFR<sup>WT</sup>**

The binding mode of compound **10<sub>a</sub>** exhibited binding affinity value of -6.93 kcal/mol. The pyrimidine-5-carbonitrile moiety was embedded in the adenine pocket of the EGFR<sup>WT</sup> forming one hydrogen bonding interaction with Lys721. In addition, it formed two hydrophobic interactions with Val702 and Leu820. The phenyl moiety occupied the hydrophobic pocket I forming a hydrophobic bond with Lys721. Moreover, the phenyl group at position-4 occupied the hydrophobic region II forming three hydrophobic interactions with Ala719, Leu694, and Leu820 (**Fig 1**).

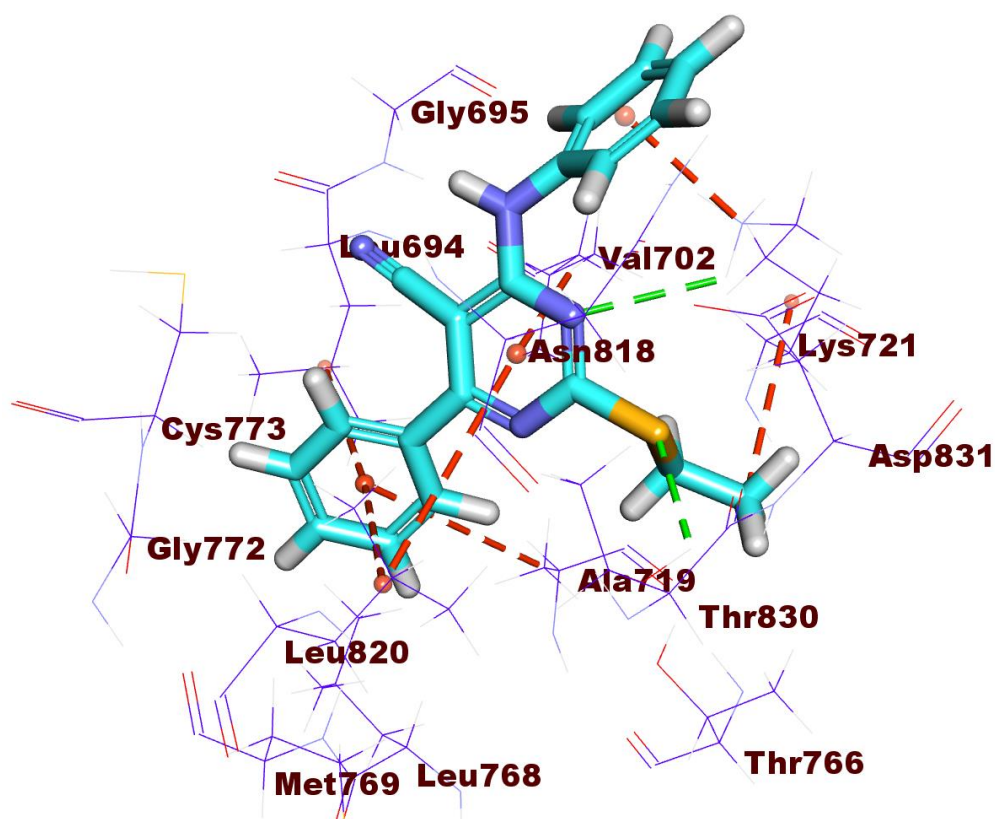

**Fig. 3:** Compound **10<sub>a</sub>** docked into the active site of EGFR<sup>WT</sup>. The hydrogen bonds were represented in green dashed lines and the pi interactions are represented in orange dashed lines.

**B) ADMET Descriptors** (*These data were retrieved from Discovery Studio 4.0 Help*)

**Table 1.** Predicted ADMET for the designed compounds and reference drugs

| <b>Comp.</b>     | <b>BBB<br/>level</b> | <b>Solubility<br/>level</b> | <b>ALog p98</b> | <b>PSA2D</b> | <b>CYP2D6<br/>prediction</b> | <b>PPB<br/>prediction</b> |
|------------------|----------------------|-----------------------------|-----------------|--------------|------------------------------|---------------------------|
| <b>10c</b>       | 0.736                | -6.692                      | 5.864           | 58.267       | -2.615                       | 4.656                     |
| <b>10d</b>       | < 0.3                | -7.346                      | 6.844           | 58.267       | -0.954                       | 5.360                     |
| <b>10f</b>       | < 0.3                | -7.336                      | 6.844           | 58.267       | -0.893                       | 7.828                     |
| <b>11a</b>       | 0.219                | -5.752                      | 4.766           | 69.528       | -3.030                       | 2.909                     |
| <b>11b</b>       | < 0.3                | -6.416                      | 5.746           | 69.528       | -1.428                       | 3.614                     |
| <b>12b</b>       | < 0.3                | -6.968                      | 6.474           | 58.267       | -1.826                       | 1.263                     |
| <b>13a</b>       | 0.481                | -5.891                      | 5.038           | 58.267       | -3.460                       | 0.959                     |
| <b>13b</b>       | < 0.3                | -6.566                      | 6.018           | 58.267       | -2.033                       | 0.902                     |
| <b>15b</b>       | < 0.3                | -6.695                      | 6.097           | 75.568       | -2.086                       | 6.087                     |
| <b>16a</b>       | < 0.3                | -6.525                      | 5.173           | 128.201      | -14.154                      | -6.464                    |
| <b>17a</b>       | 0.537                | -5.954                      | 5.22            | 58.267       | -1.009                       | 2.812                     |
| <b>17b</b>       | < 0.3                | -6.605                      | 6.199           | 58.267       | 0.662                        | 3.327                     |
| <b>Erlotinib</b> | 0.054                | -5.11                       | 4.309           | 71.052       | -2.881                       | 0.620                     |
| <b>Gefitinib</b> | -0.371               | -4.485                      | 2.642           | 65.326       | -0.801                       | -0.126                    |

**a- Key to human intestinal absorption (ADMET Absorption Level)**

| Level | Value                                                                                                       | Description         |
|-------|-------------------------------------------------------------------------------------------------------------|---------------------|
| 0     | $\text{ADMET\_Absorption\_T2\_2D} < 6.1261$ (inside 95%)                                                    | Good absorption     |
| 1     | $6.1261 \leq \text{ADMET\_Absorption\_T2\_2D} < 9.6026$ (inside 99%)                                        | Moderate absorption |
| 2     | $9.6026 < \text{ADMET\_Absorption\_T2\_2D}$ (outside 99%)                                                   | Low absorption      |
| 3     | $\text{ADMET\_PSA\_2D} \geq 150.0$ or $\text{ADMET\_AlogP98} \leq -2.0$ or $\text{ADMET\_AlogP98} \geq 7.0$ | Very low absorption |

- **Note.** ADMET\_Absorption\_T2\_2D is the Mahalanobis distance for the compound in the ADMET\_PSA\_2D, ADMET\_AlogP98 plane. It is referenced from the center of the region of chemical space defined by well absorbed compounds

**b- Key to aqueous solubility levels (ADMET Solubility Level)**

| Level | Value                             | Drug-likeness                                             |
|-------|-----------------------------------|-----------------------------------------------------------|
| 0     | $\log(\text{Sw}) < -8.0$          | Extremely low                                             |
| 1     | $-8.0 < \log(\text{Sw}) < -6.0$   | No, very low, but possible                                |
| 2     | $-6.0 < \log(\text{Sw}) < -4.0$   | Yes, low                                                  |
| 3     | $-4.0 < \log(\text{Sw}) < -2.0$   | Yes, good                                                 |
| 4     | $-2.0 < \log(\text{Sw}) \leq 0.0$ | Yes, optimal                                              |
| 5     | $0.0 < \log(\text{Sw})$           | No, too soluble                                           |
| 6     | -1000                             | Warning: molecules with one or more unknown AlogP98 types |

**c- Key to BBB penetration levels (ADMET BBB)**

| Level | Value     | Description                                               |
|-------|-----------|-----------------------------------------------------------|
| 0     | Very High | Brain-Blood ratio greater than 5:1                        |
| 1     | High      | Brain-Blood ratio between 1:1 and 5:1                     |
| 2     | Medium    | Brain-Blood ratio between 0.3:1 and 1:1                   |
| 3     | Low       | Brain-Blood ratio less than 0.3:1                         |
| 4     | Undefined | Outside 99% confidence ellipse                            |
| 5     | AlogP98   | Warning: molecules with one or more unknown AlogP98 types |

**d- ADMET - Cytochrome P450 2D6 (CYP2D6)**

|                         |                                                                                                                                                                                        |
|-------------------------|----------------------------------------------------------------------------------------------------------------------------------------------------------------------------------------|
| ADMET CYP2D6 Prediction | The classification whether a compound is an CYP2D6 inhibitor using the cutoff Bayesian score of 0.161 (obtained by minimizing the total number of false positives and false negatives) |
|-------------------------|----------------------------------------------------------------------------------------------------------------------------------------------------------------------------------------|

**e- ADMET - Plasma Protein Binding**

|                      |                                                                                                                                                                                                                            |
|----------------------|----------------------------------------------------------------------------------------------------------------------------------------------------------------------------------------------------------------------------|
| ADMET PPB Prediction | The classification whether a compound is highly bounded ( $\geq 90\%$ bound) to plasma proteins using the cutoff Bayesian score of -2.209 (obtained by minimizing the total number of false positives and false negatives) |
|----------------------|----------------------------------------------------------------------------------------------------------------------------------------------------------------------------------------------------------------------------|

<sup>1</sup>H NMR of compound 10a

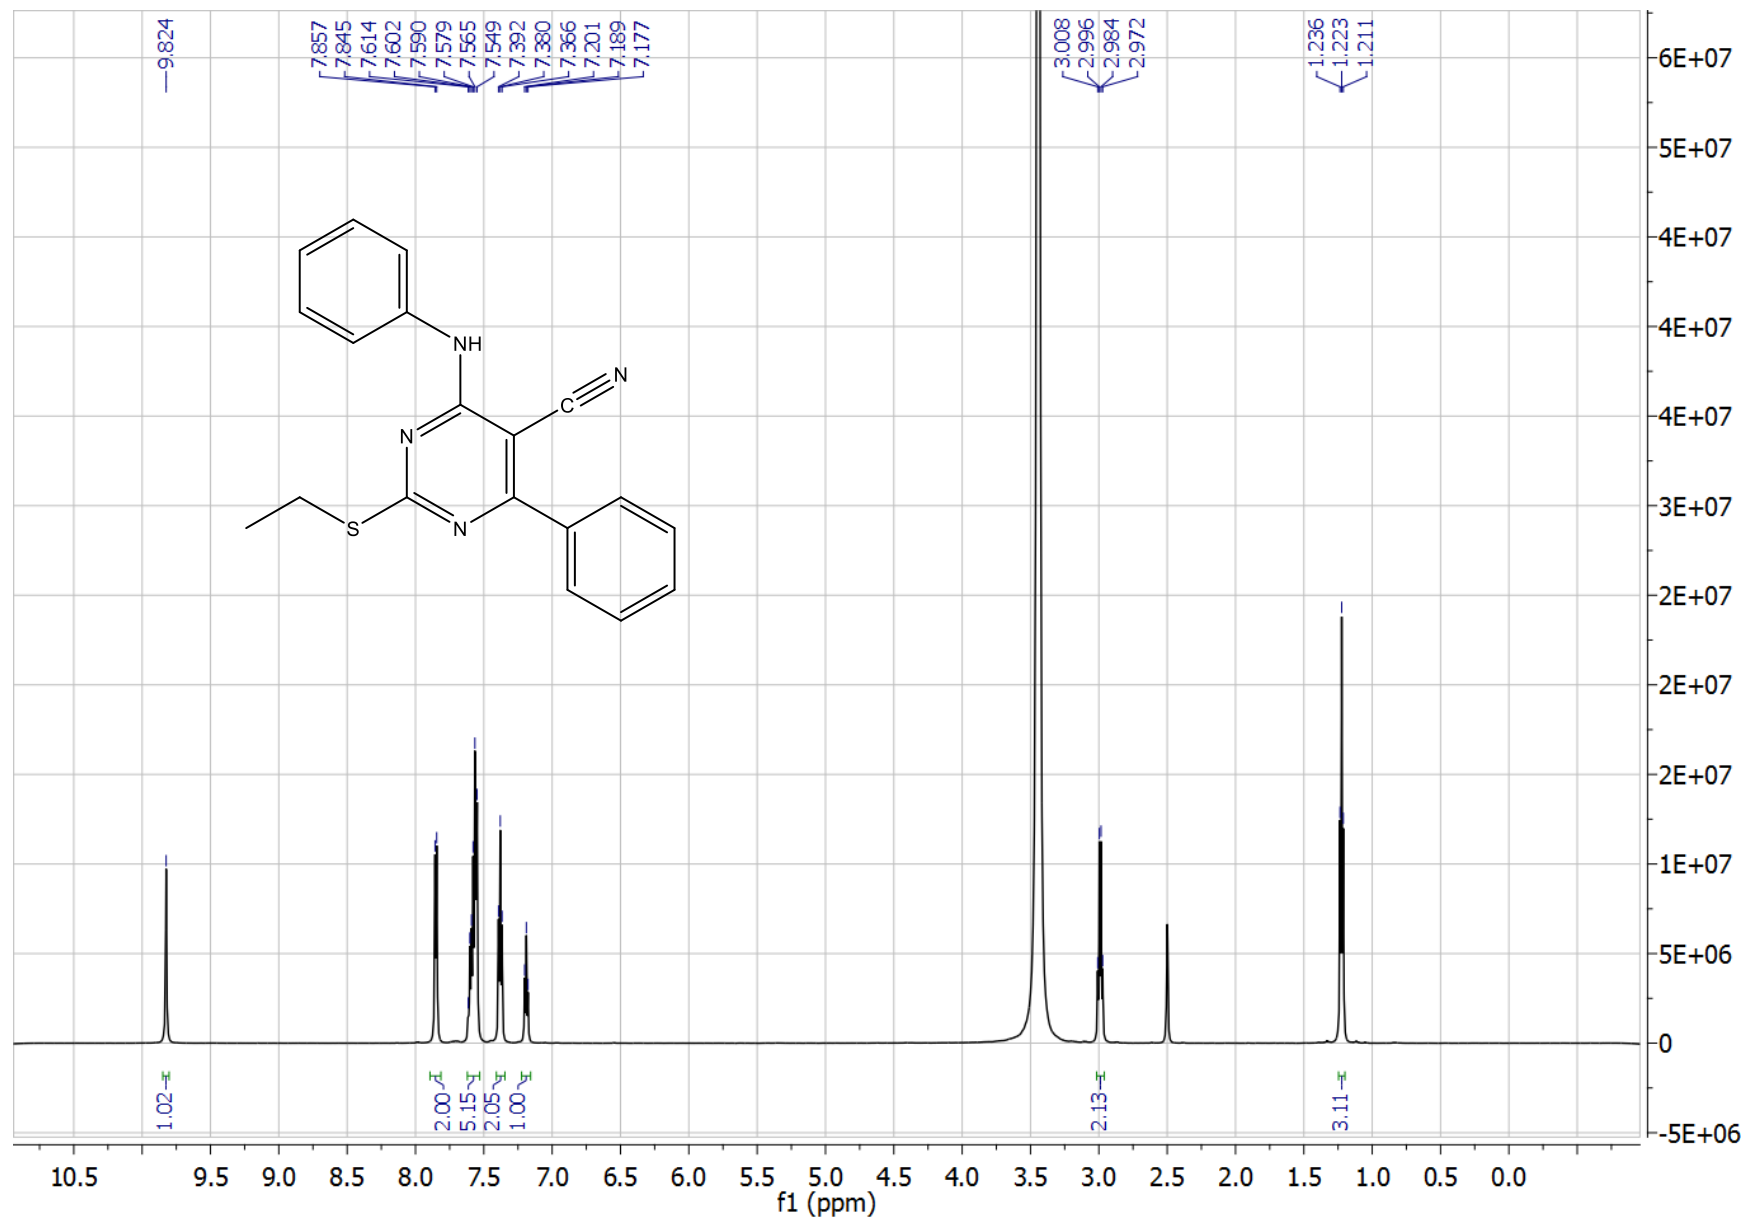

<sup>1</sup>H NMR of compound 10a

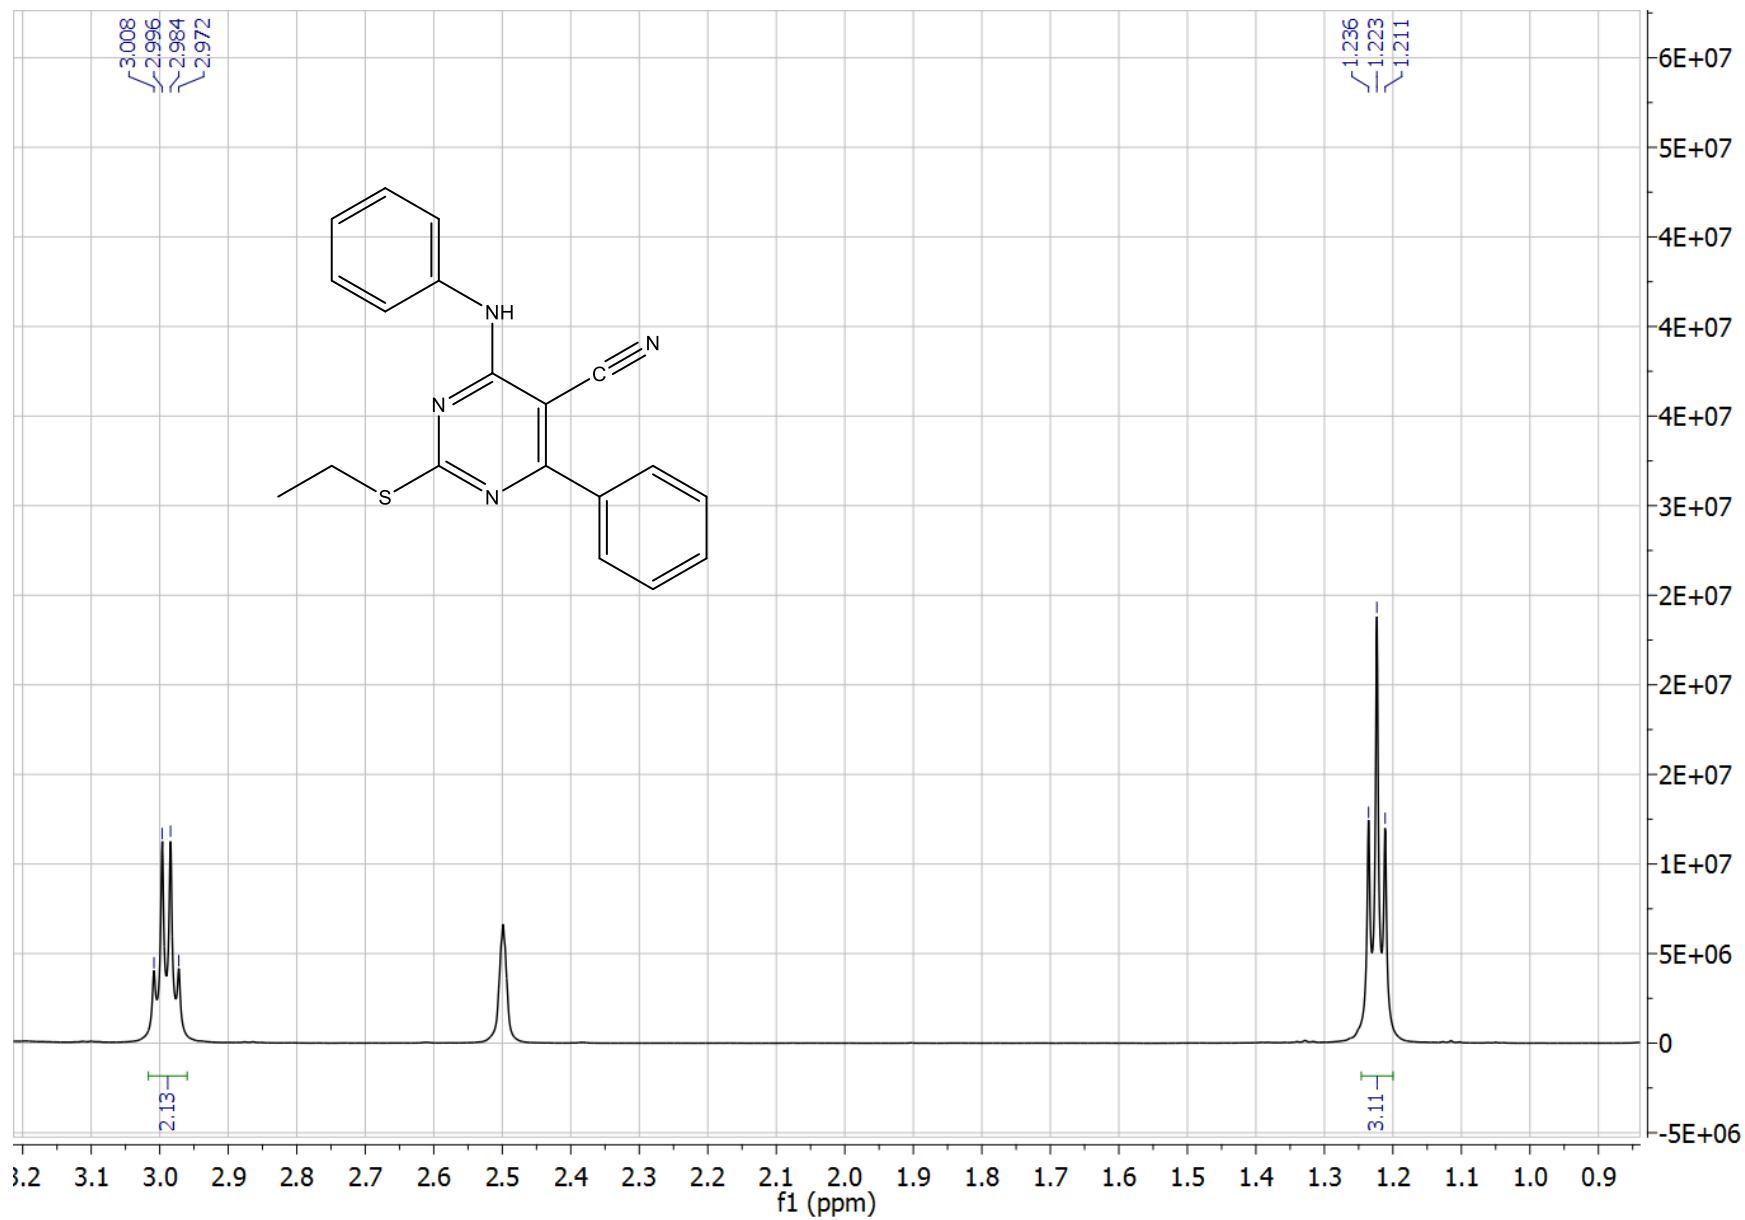

<sup>1</sup>H NMR of compound 10a

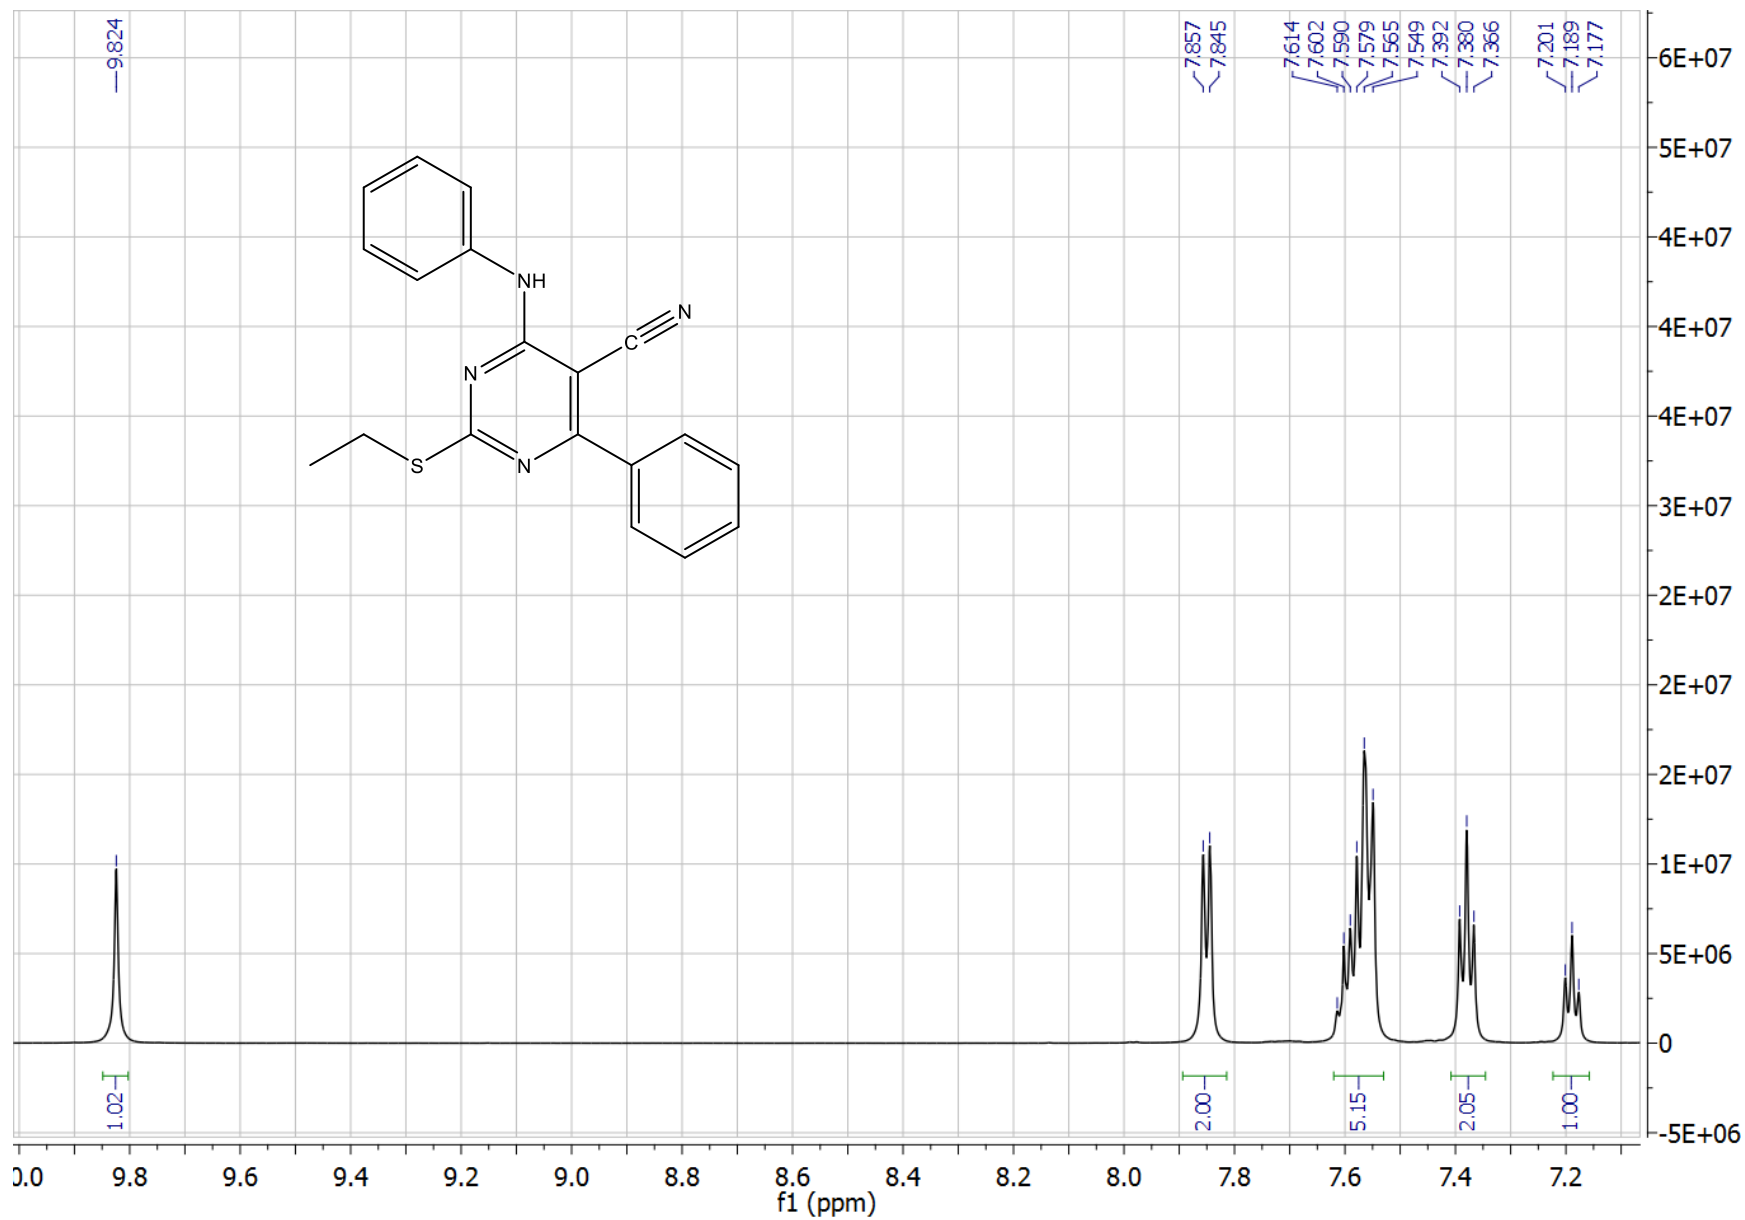



<sup>13</sup>C NMR of compound 10a

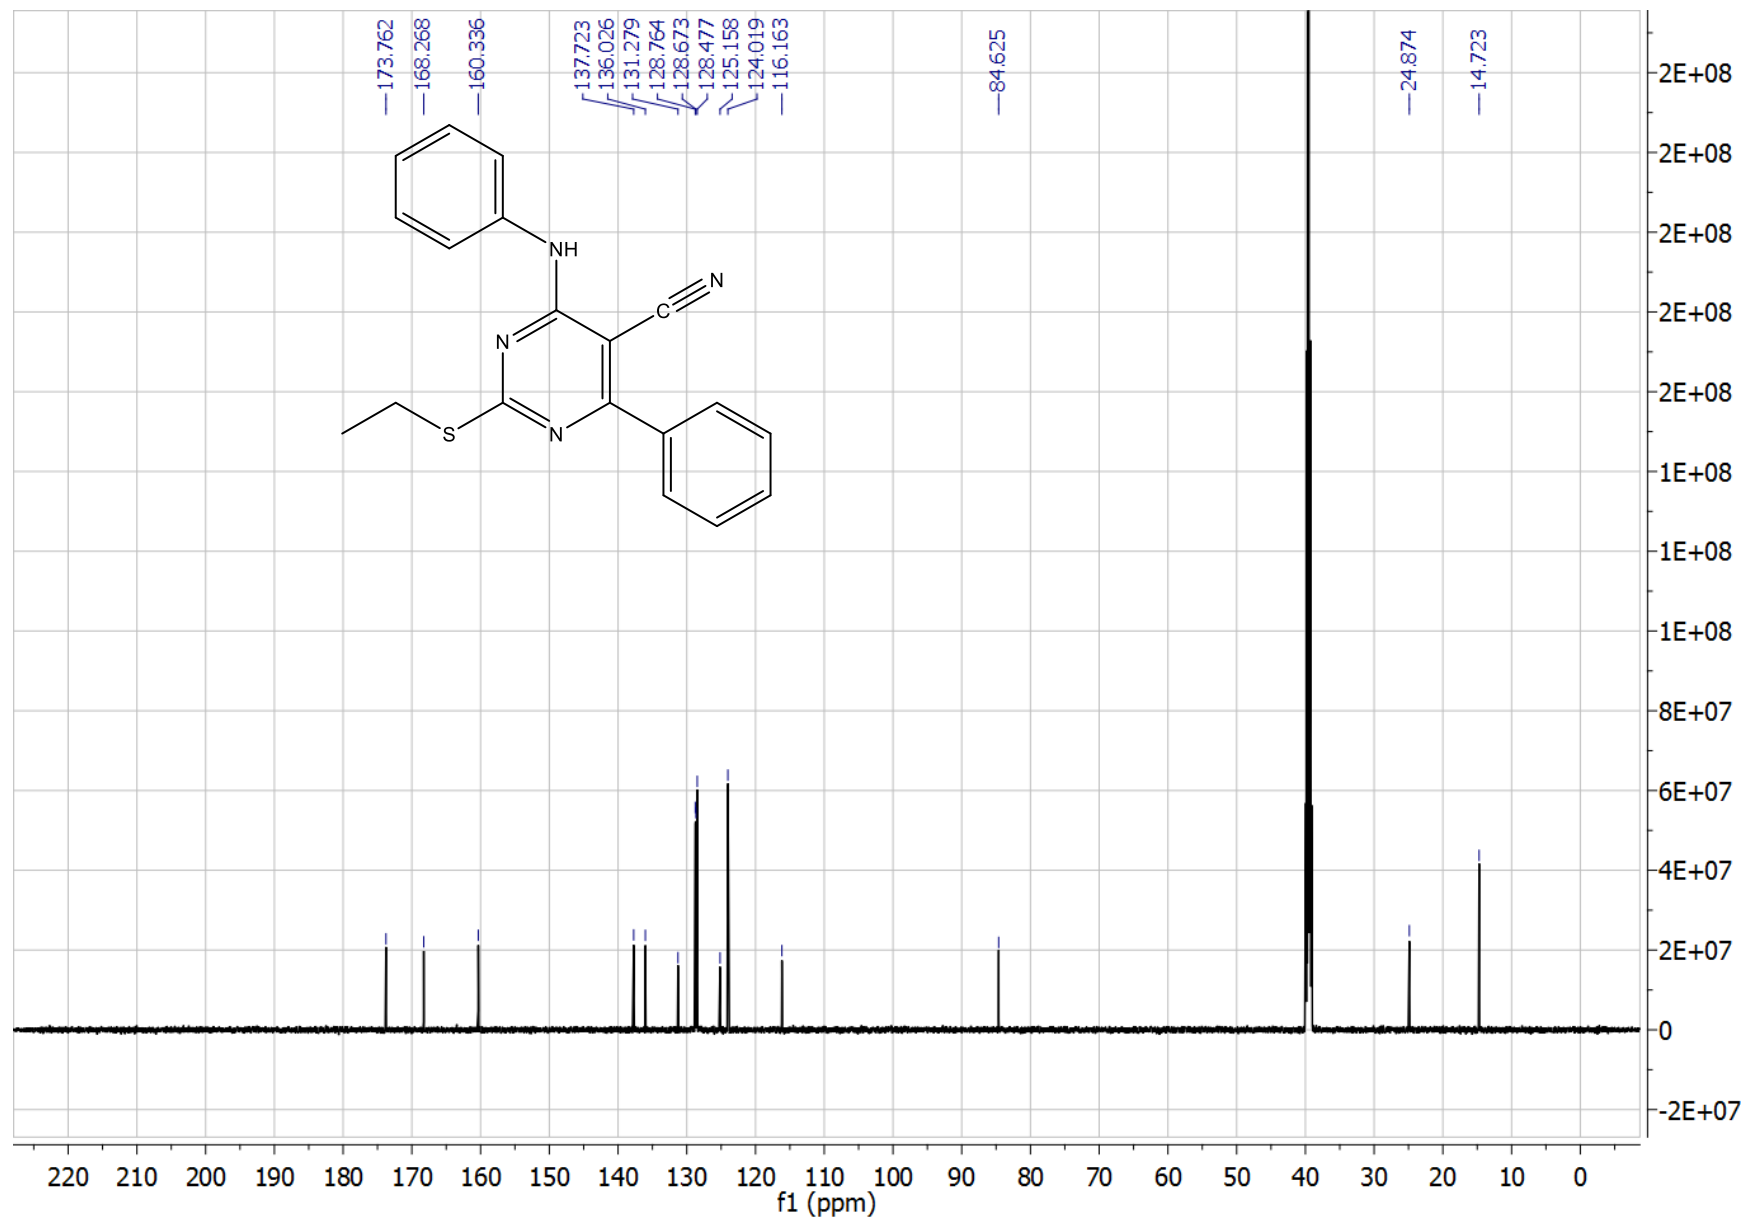

**<sup>13</sup>C NMR of compound 10a**

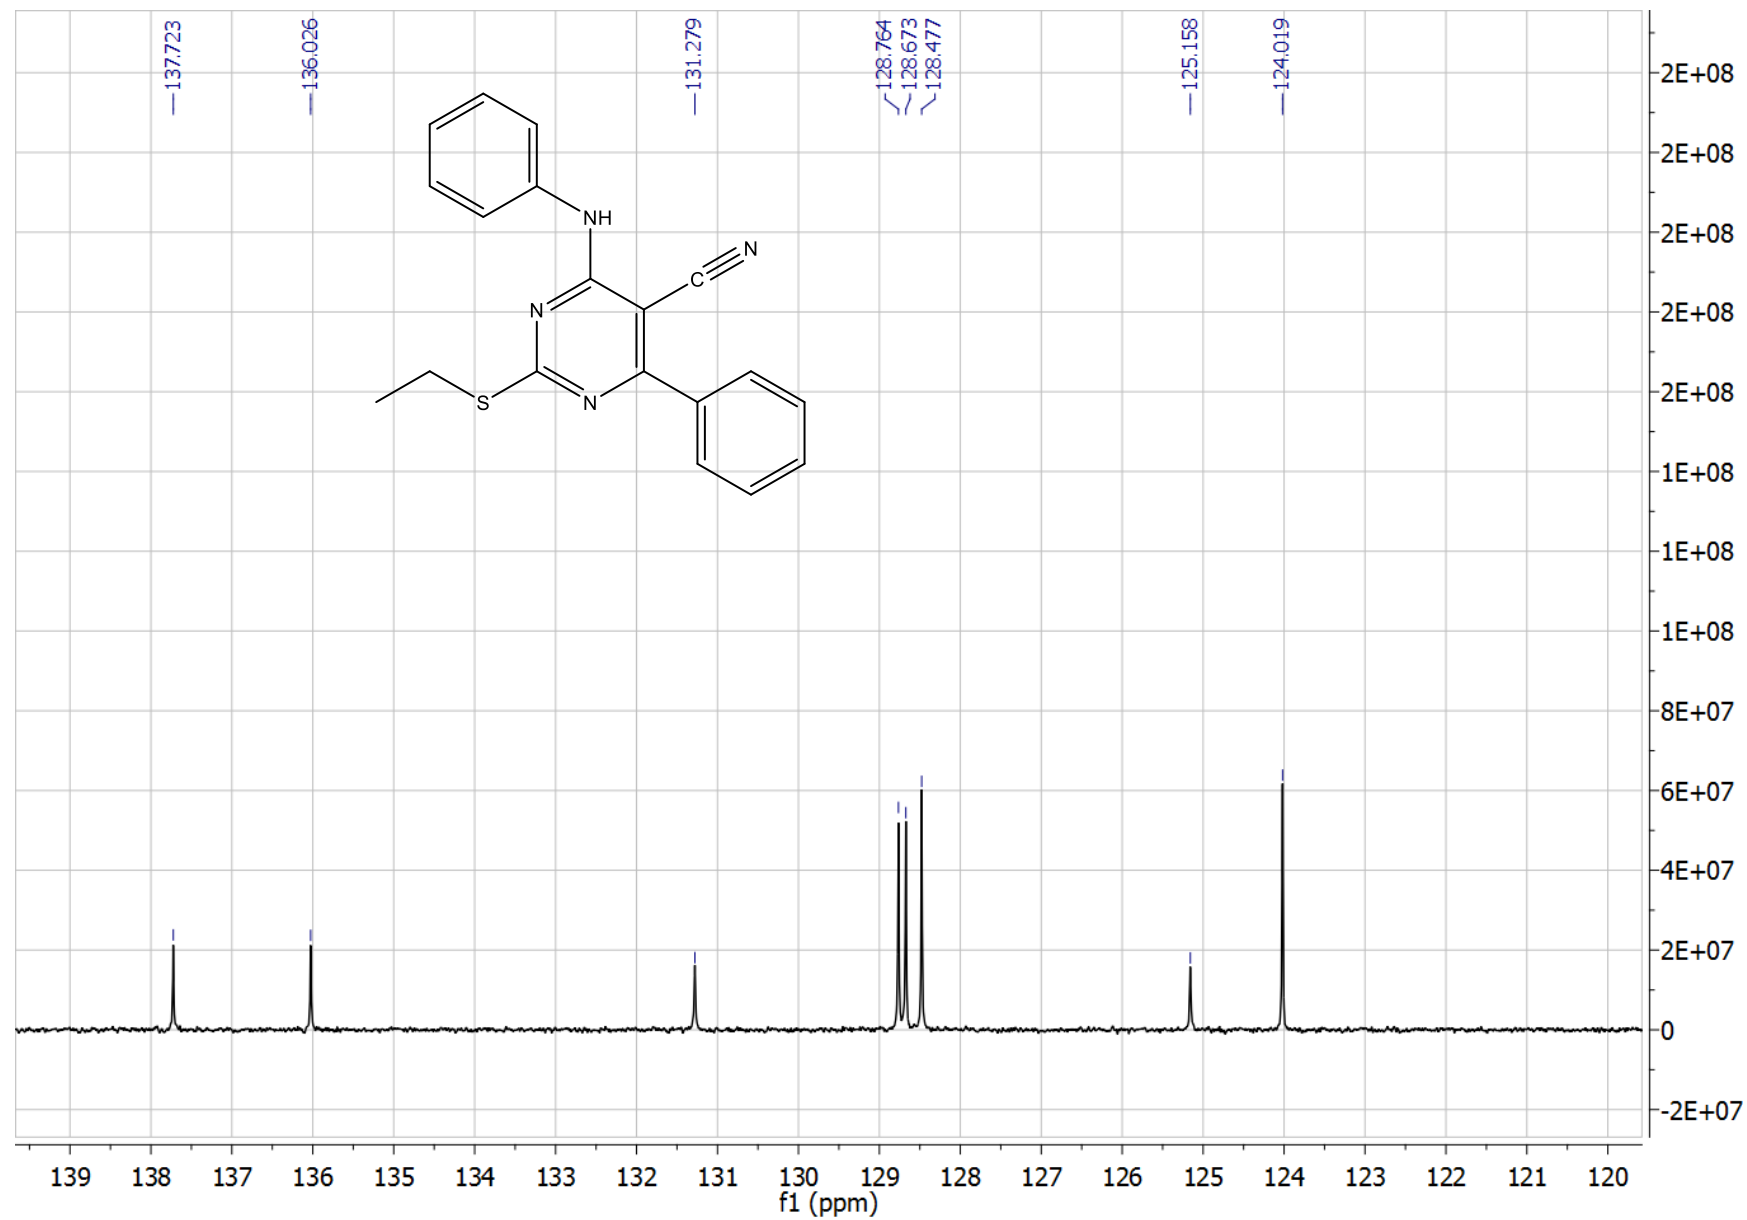

# APT of compound 10a

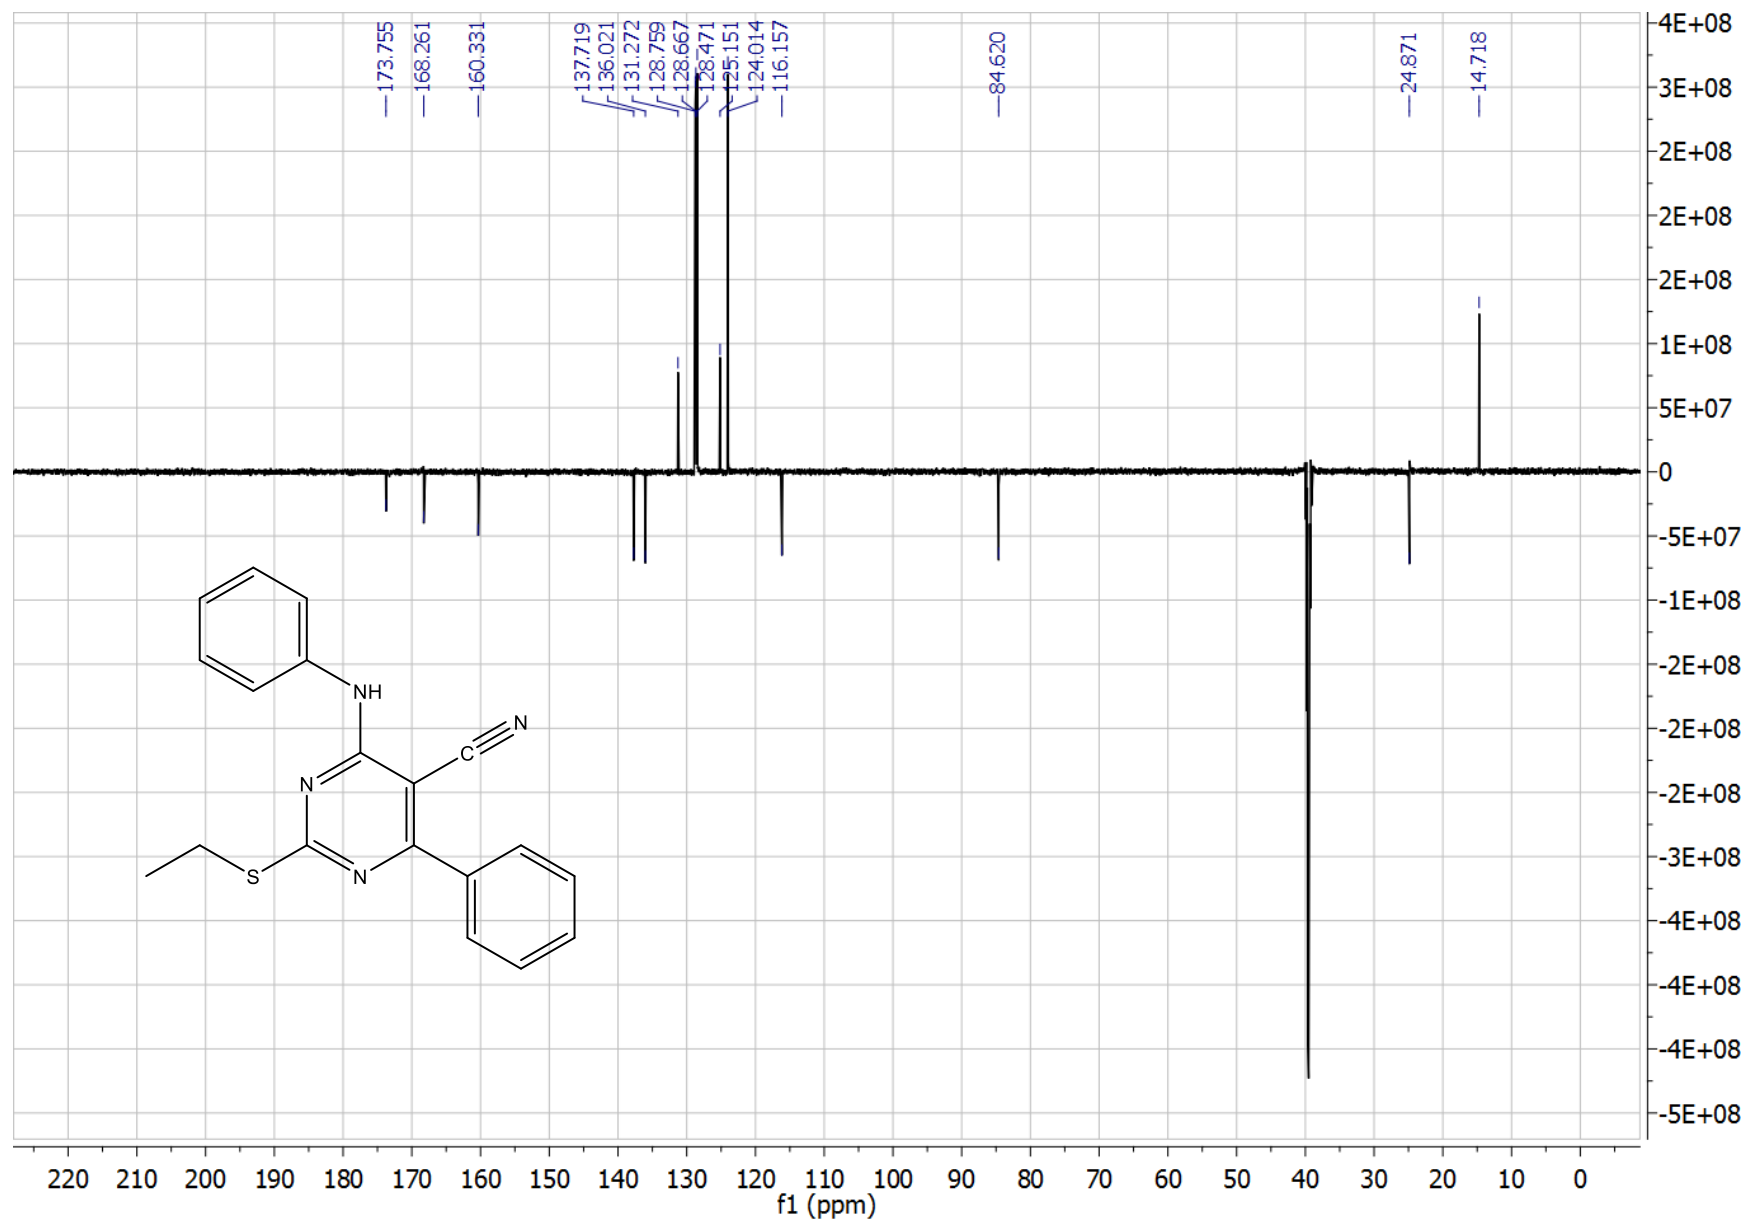

# APT of compound 10a

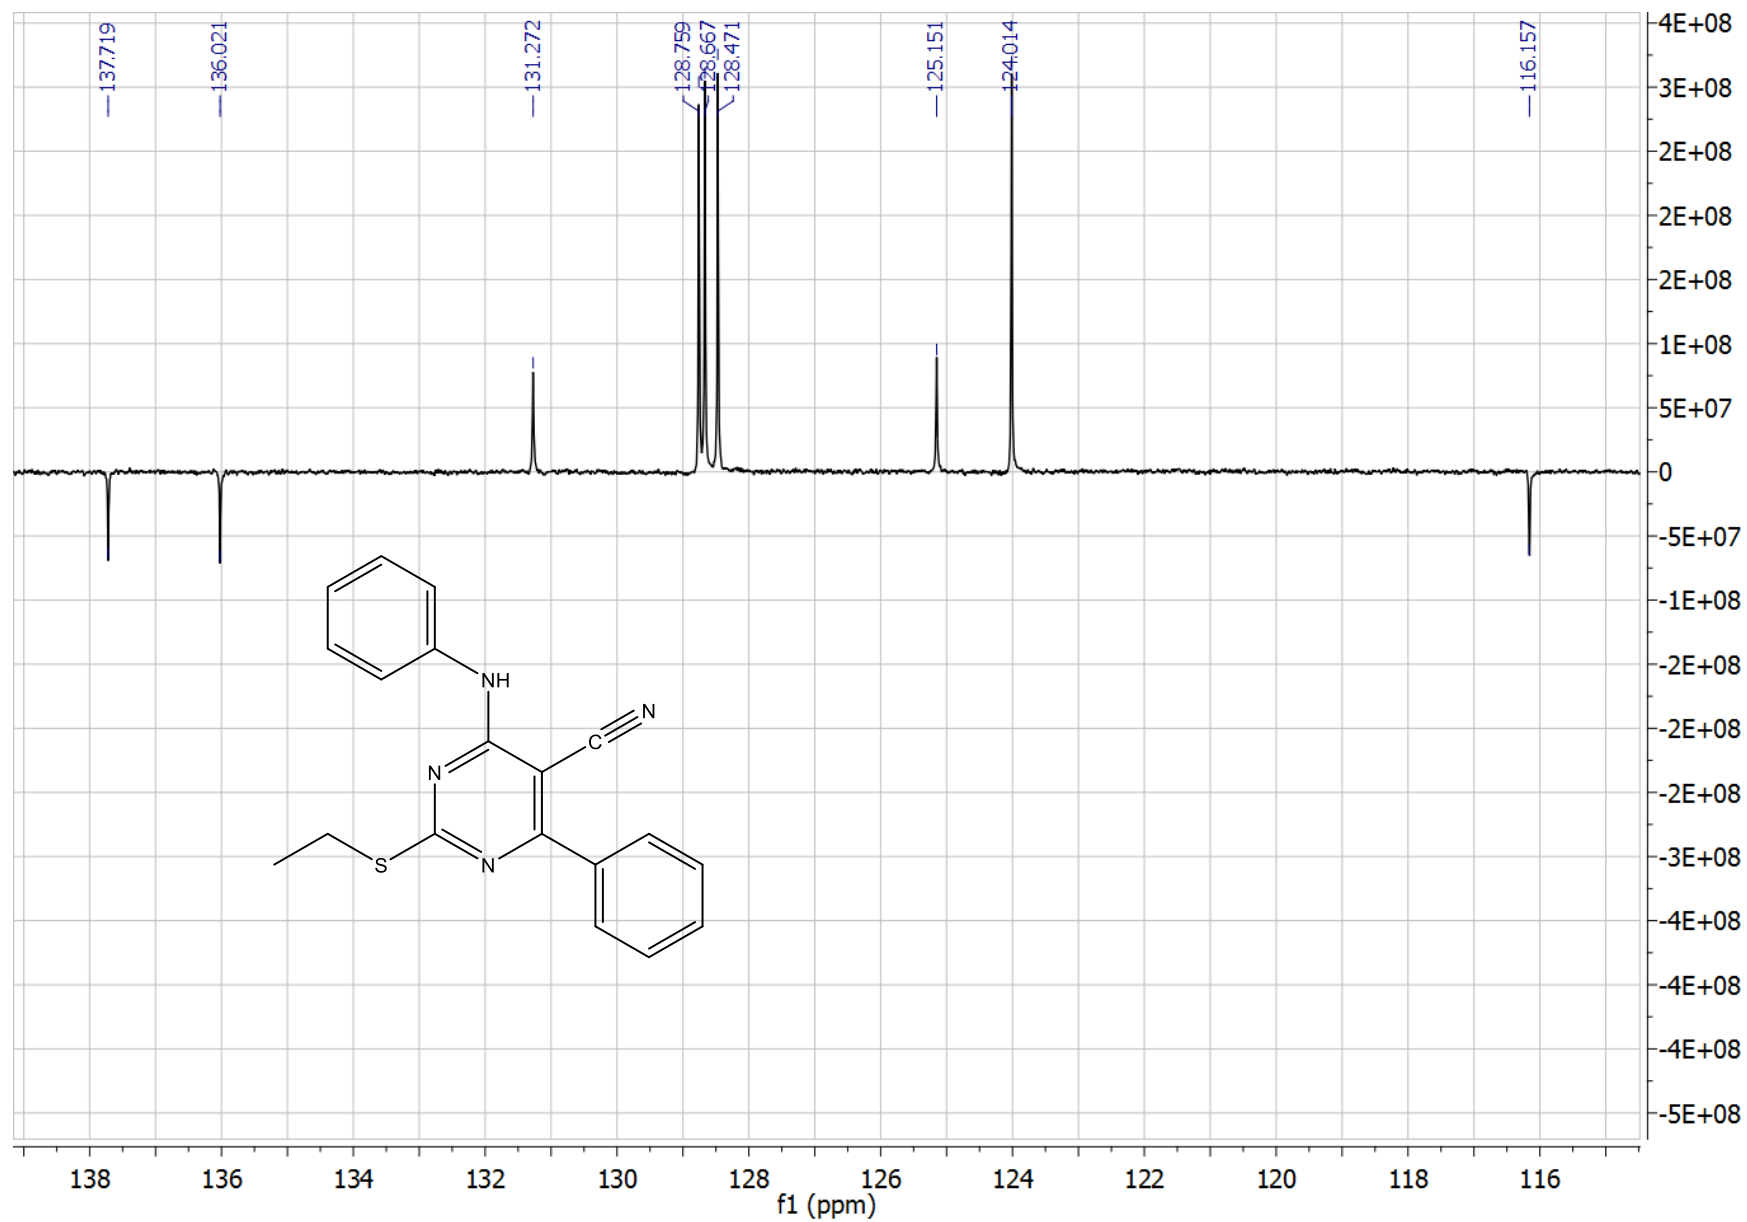

<sup>1</sup>H NMR of compound 10<sub>b</sub>

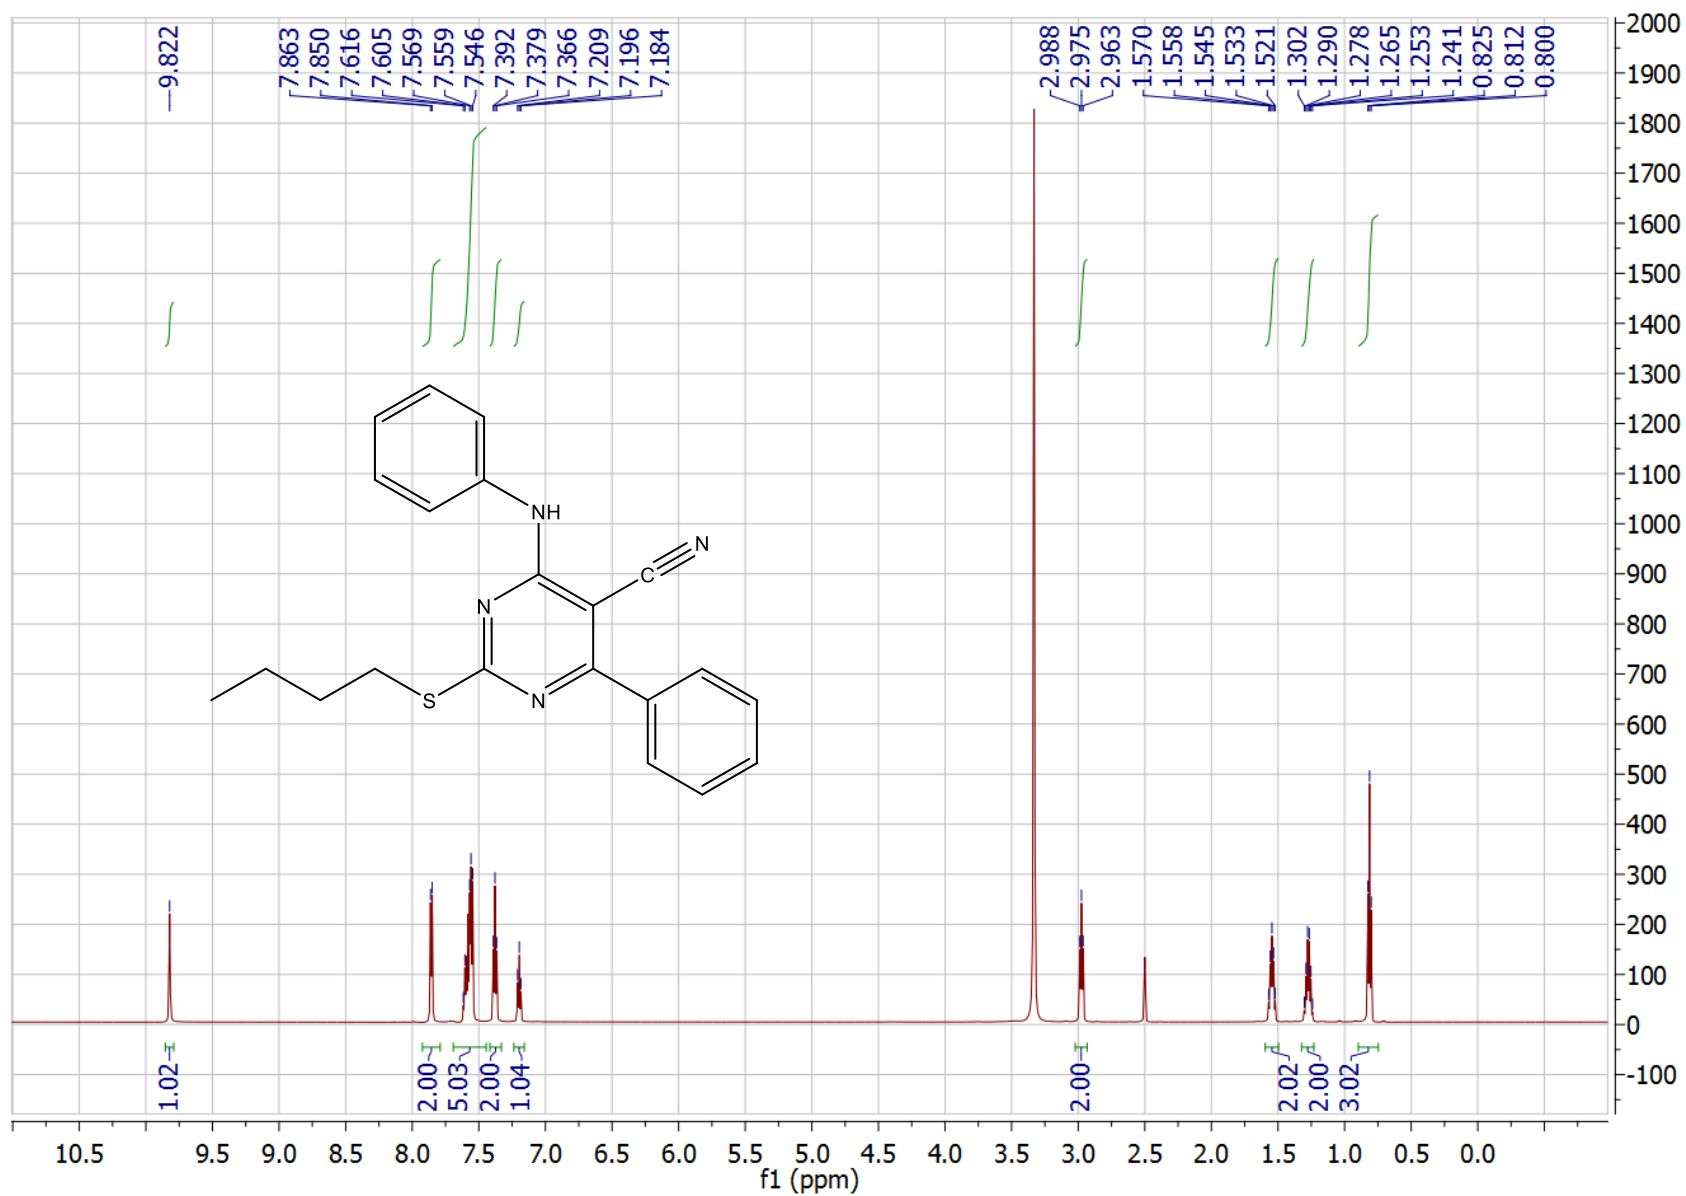

<sup>1</sup>H NMR of compound 10<sub>b</sub>

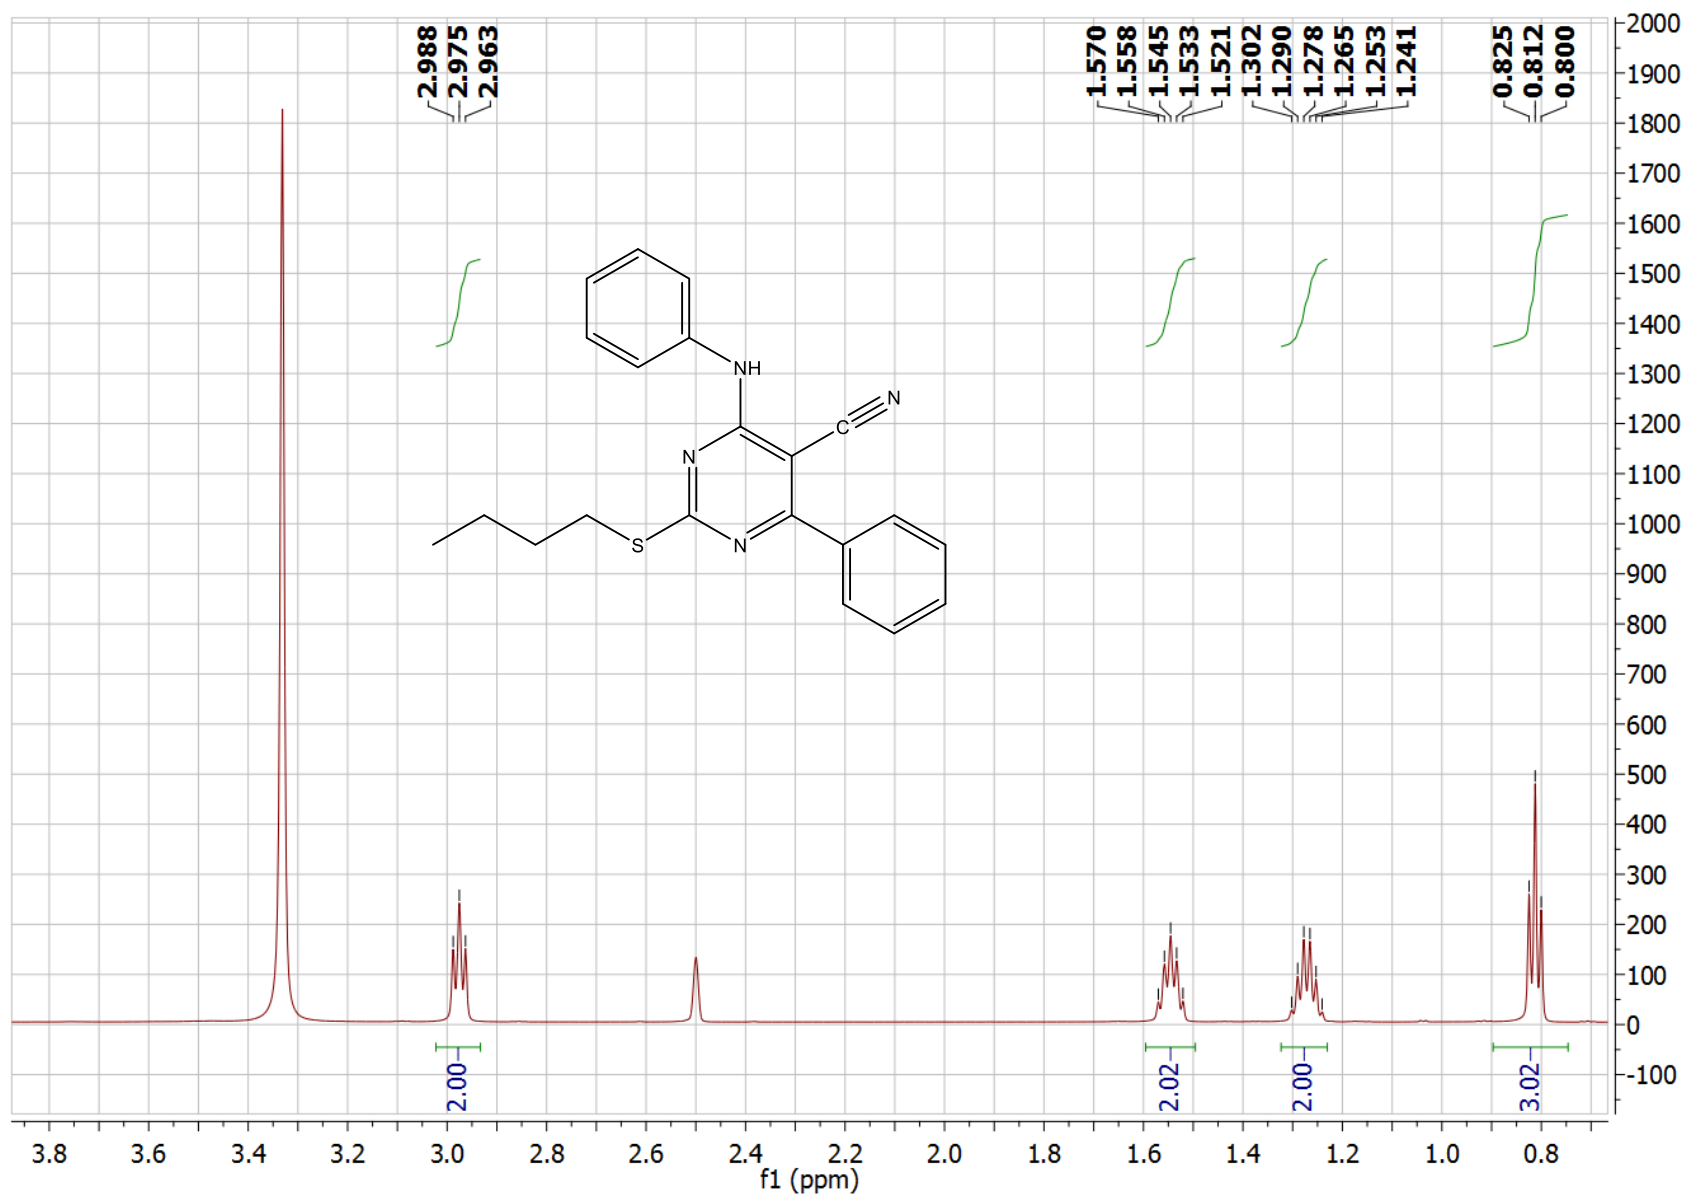

<sup>1</sup>H NMR of compound 10<sub>b</sub>

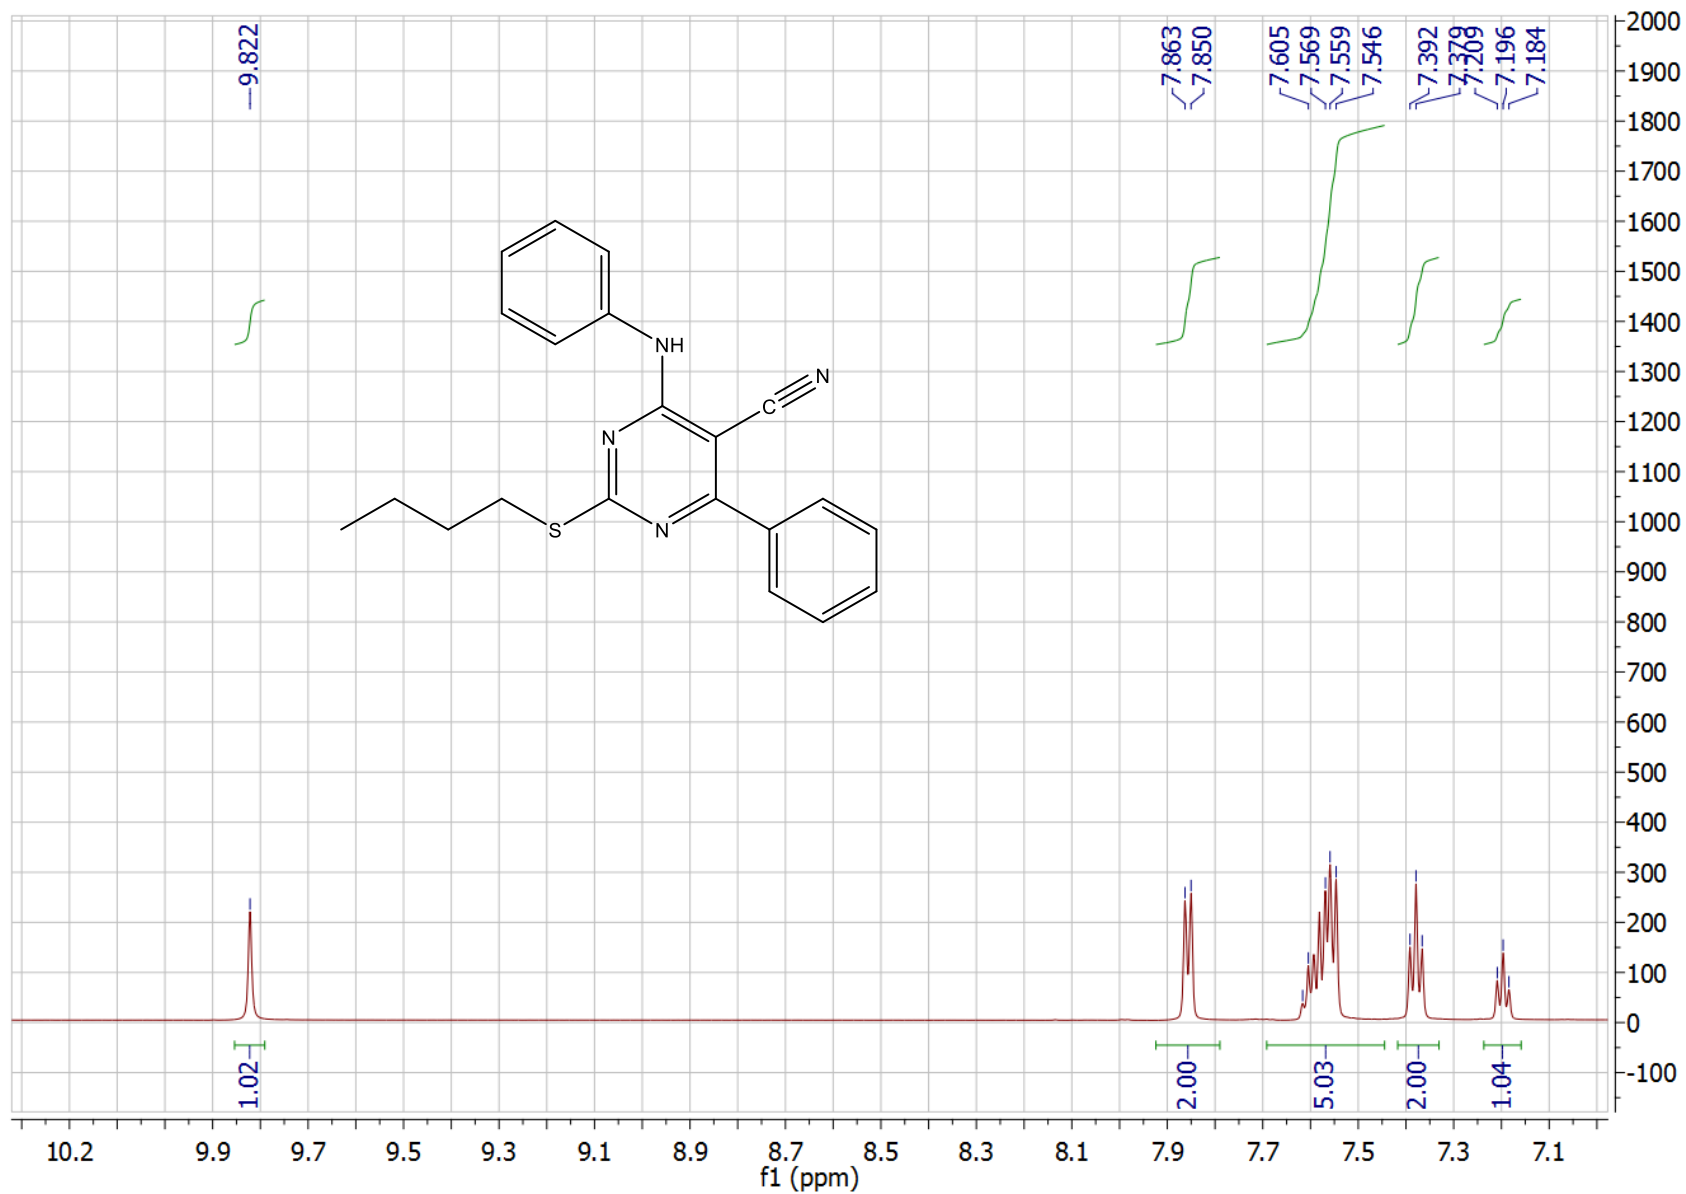

<sup>13</sup>C NMR of compound 10<sub>b</sub>

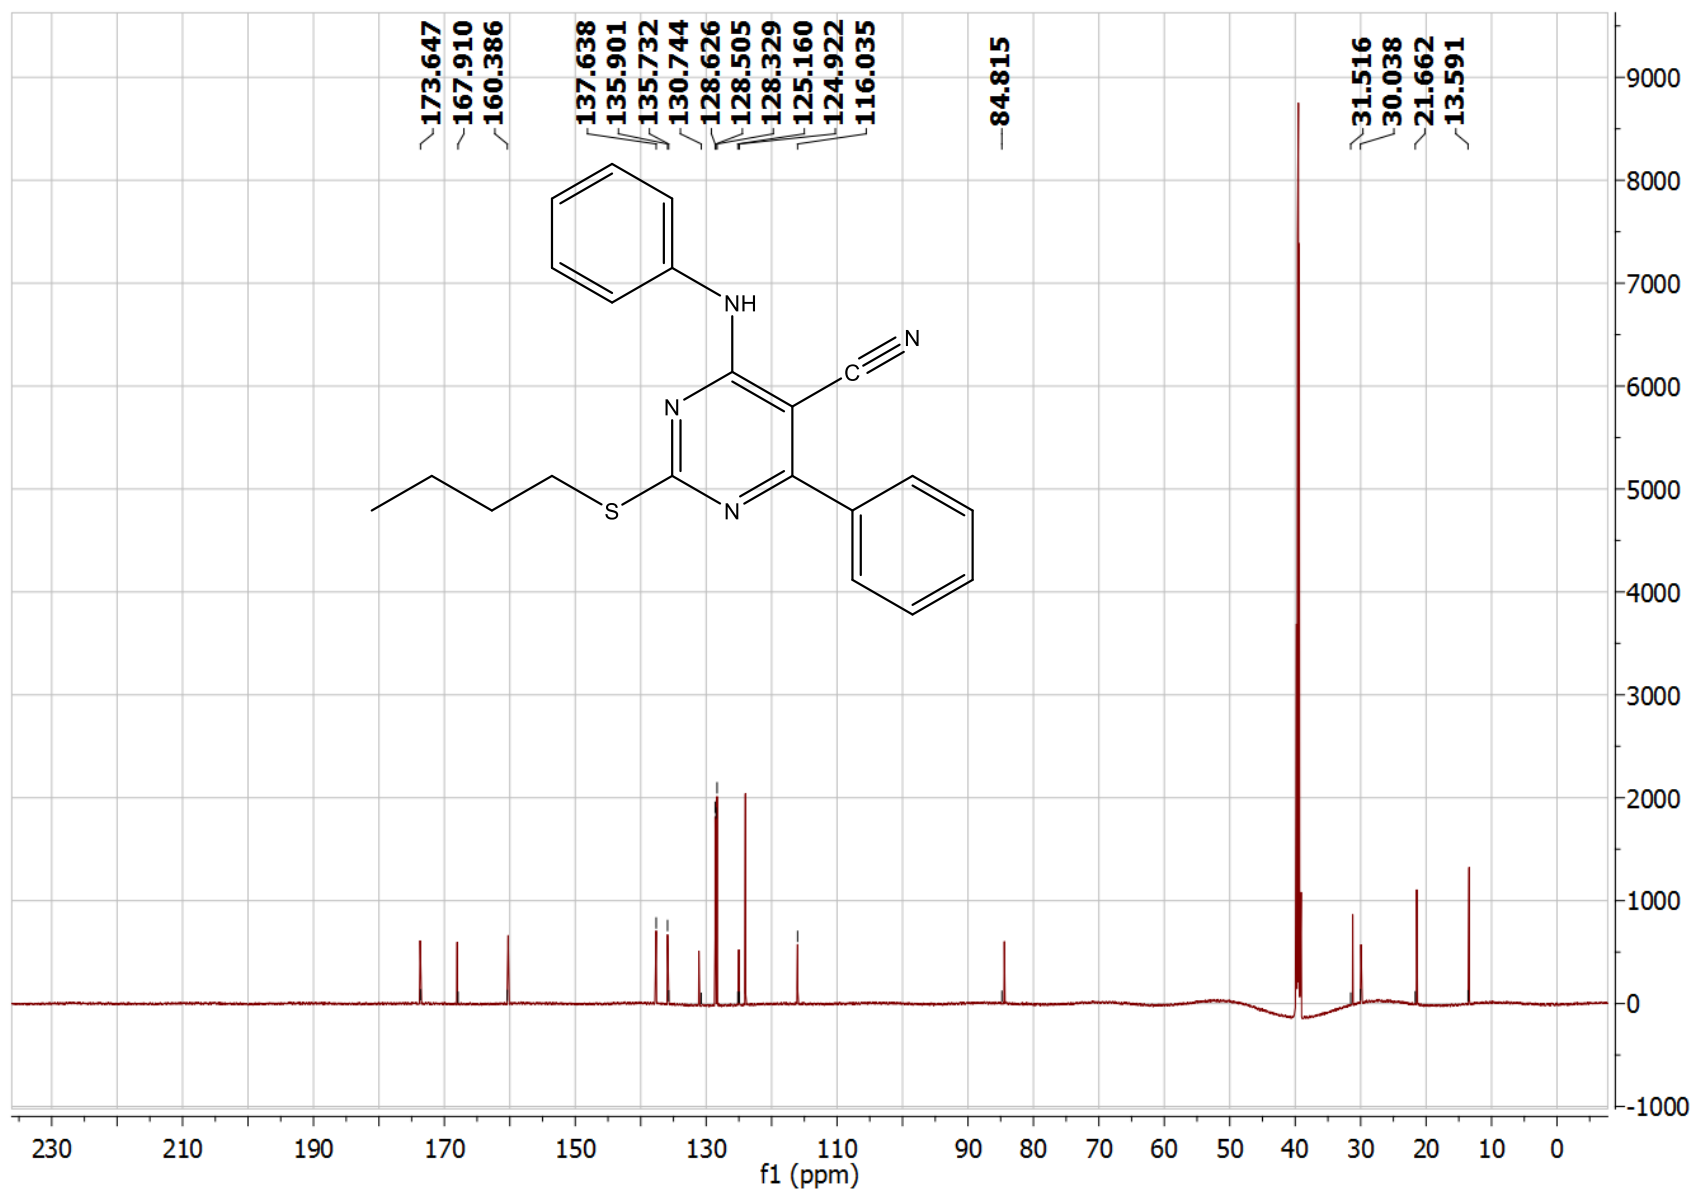



<sup>13</sup>C NMR of compound 10<sub>b</sub>

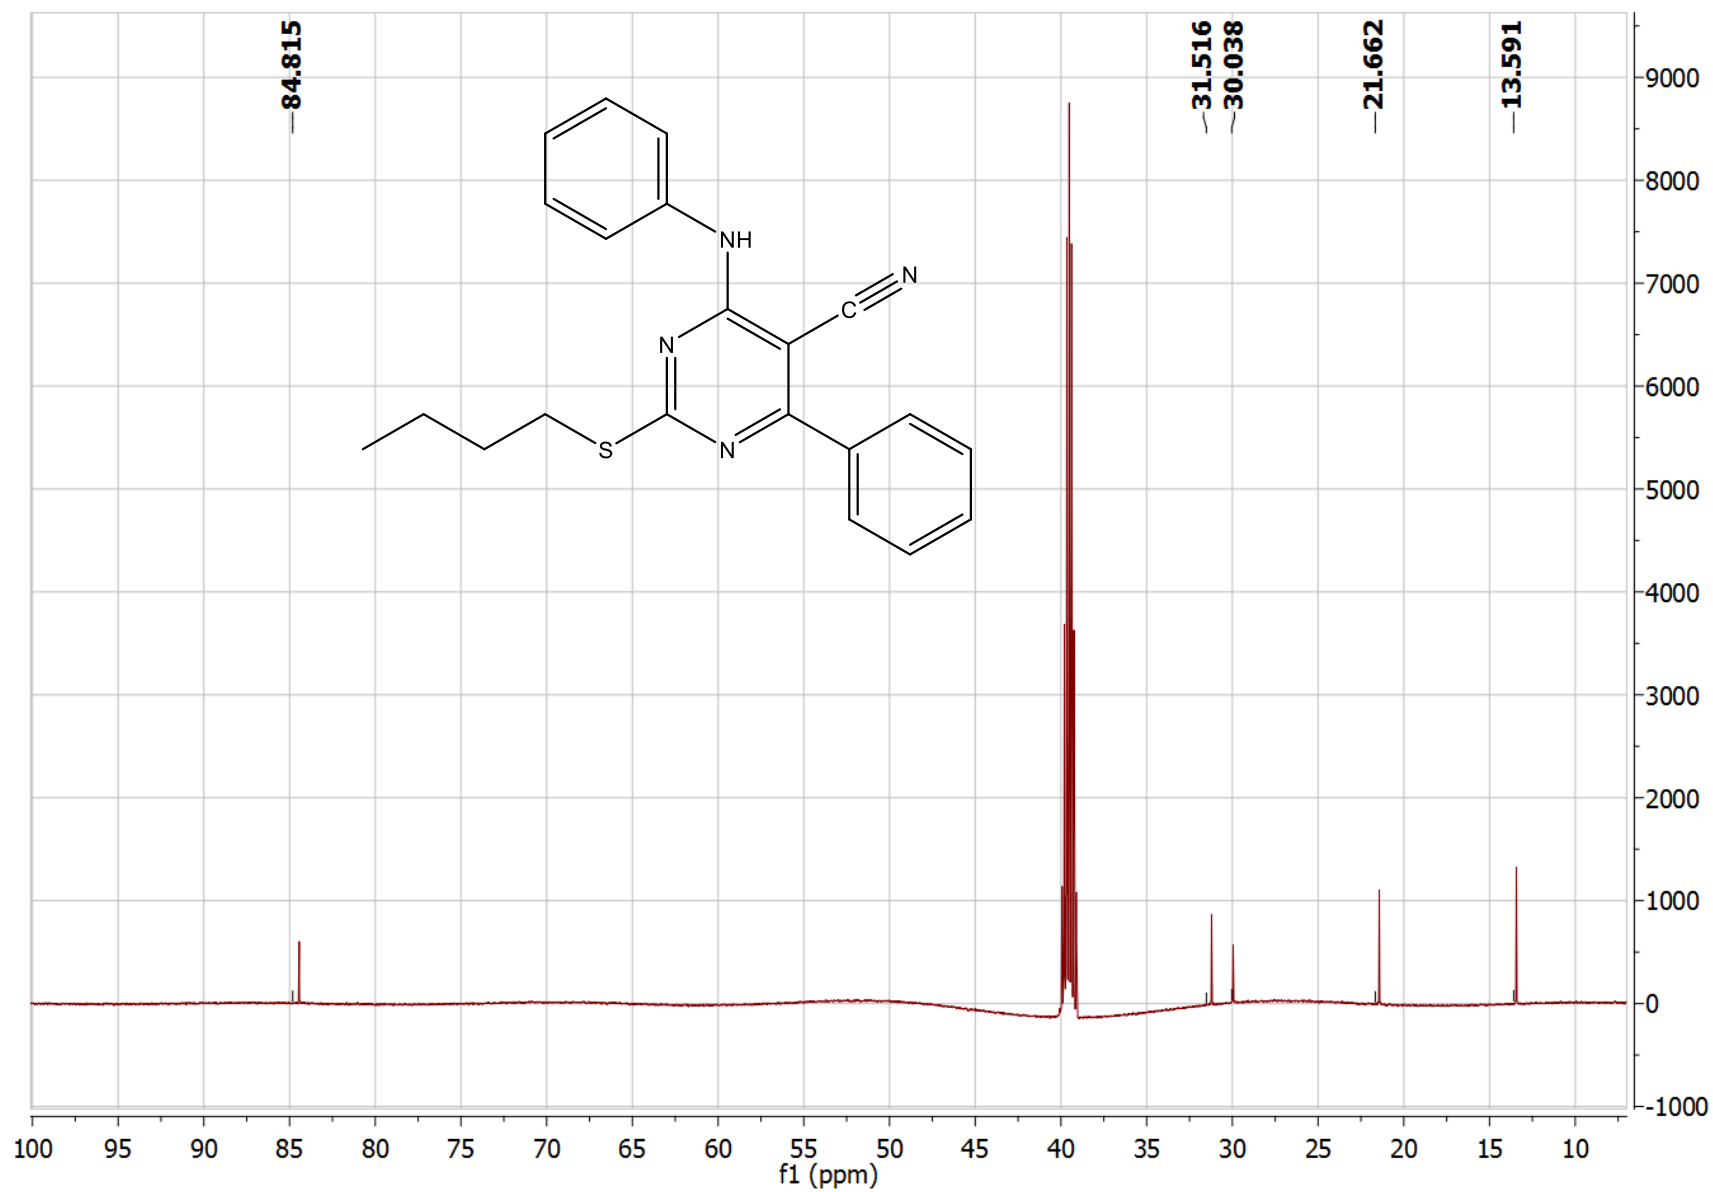

<sup>13</sup>C NMR of compound 10<sub>b</sub>

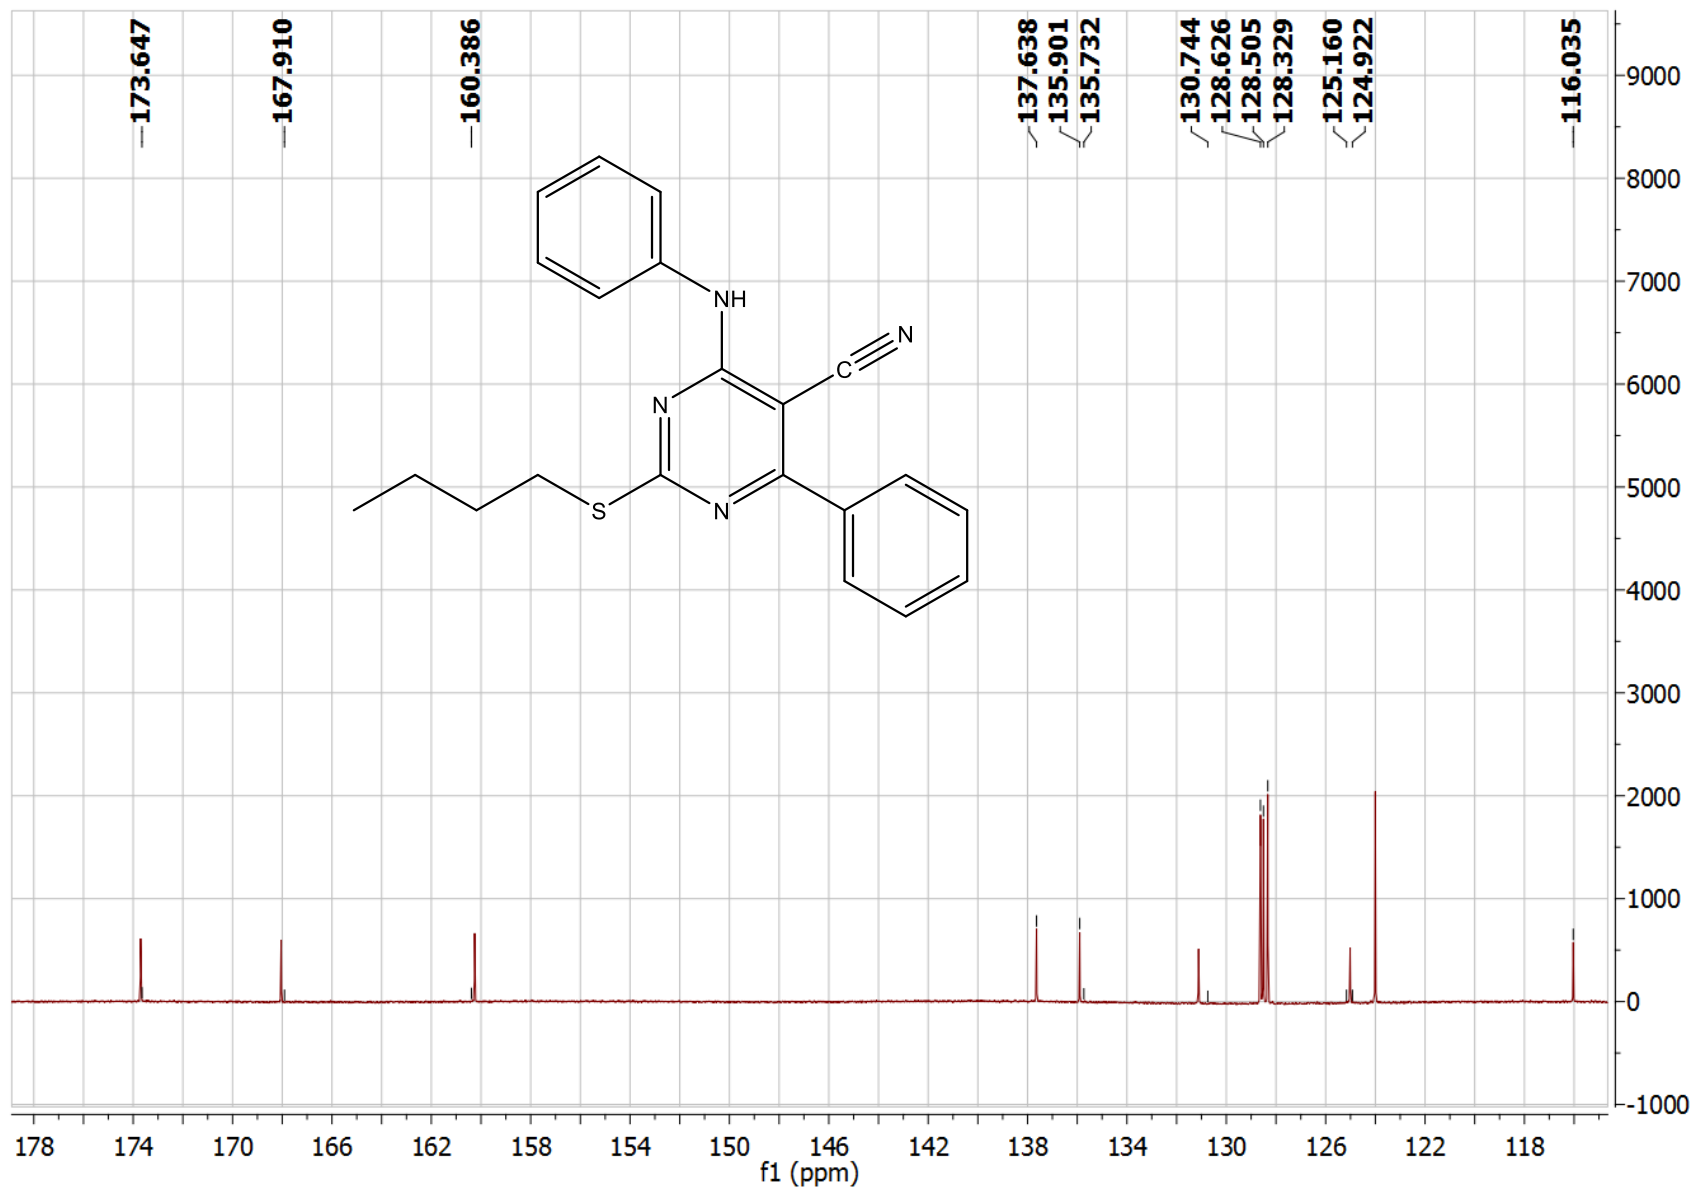

APT of compound 10<sub>b</sub>

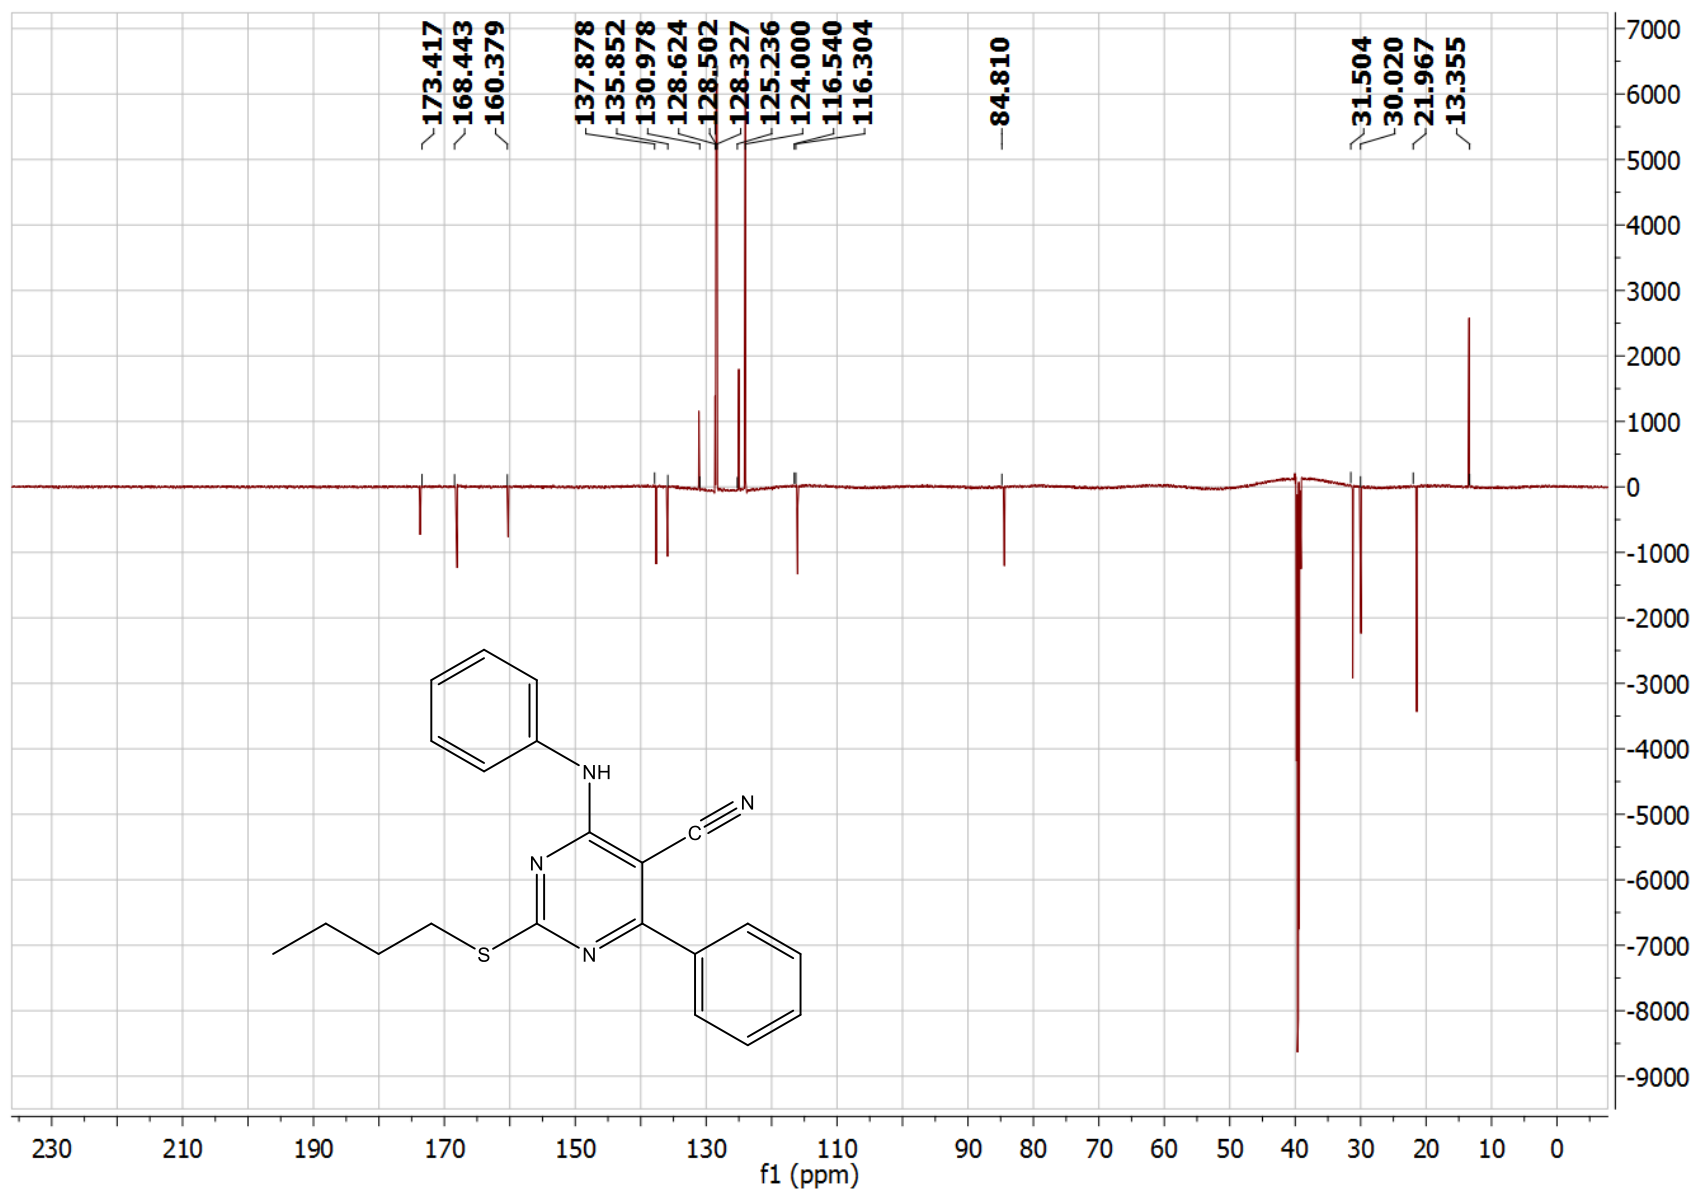

APT of compound 10<sub>b</sub>

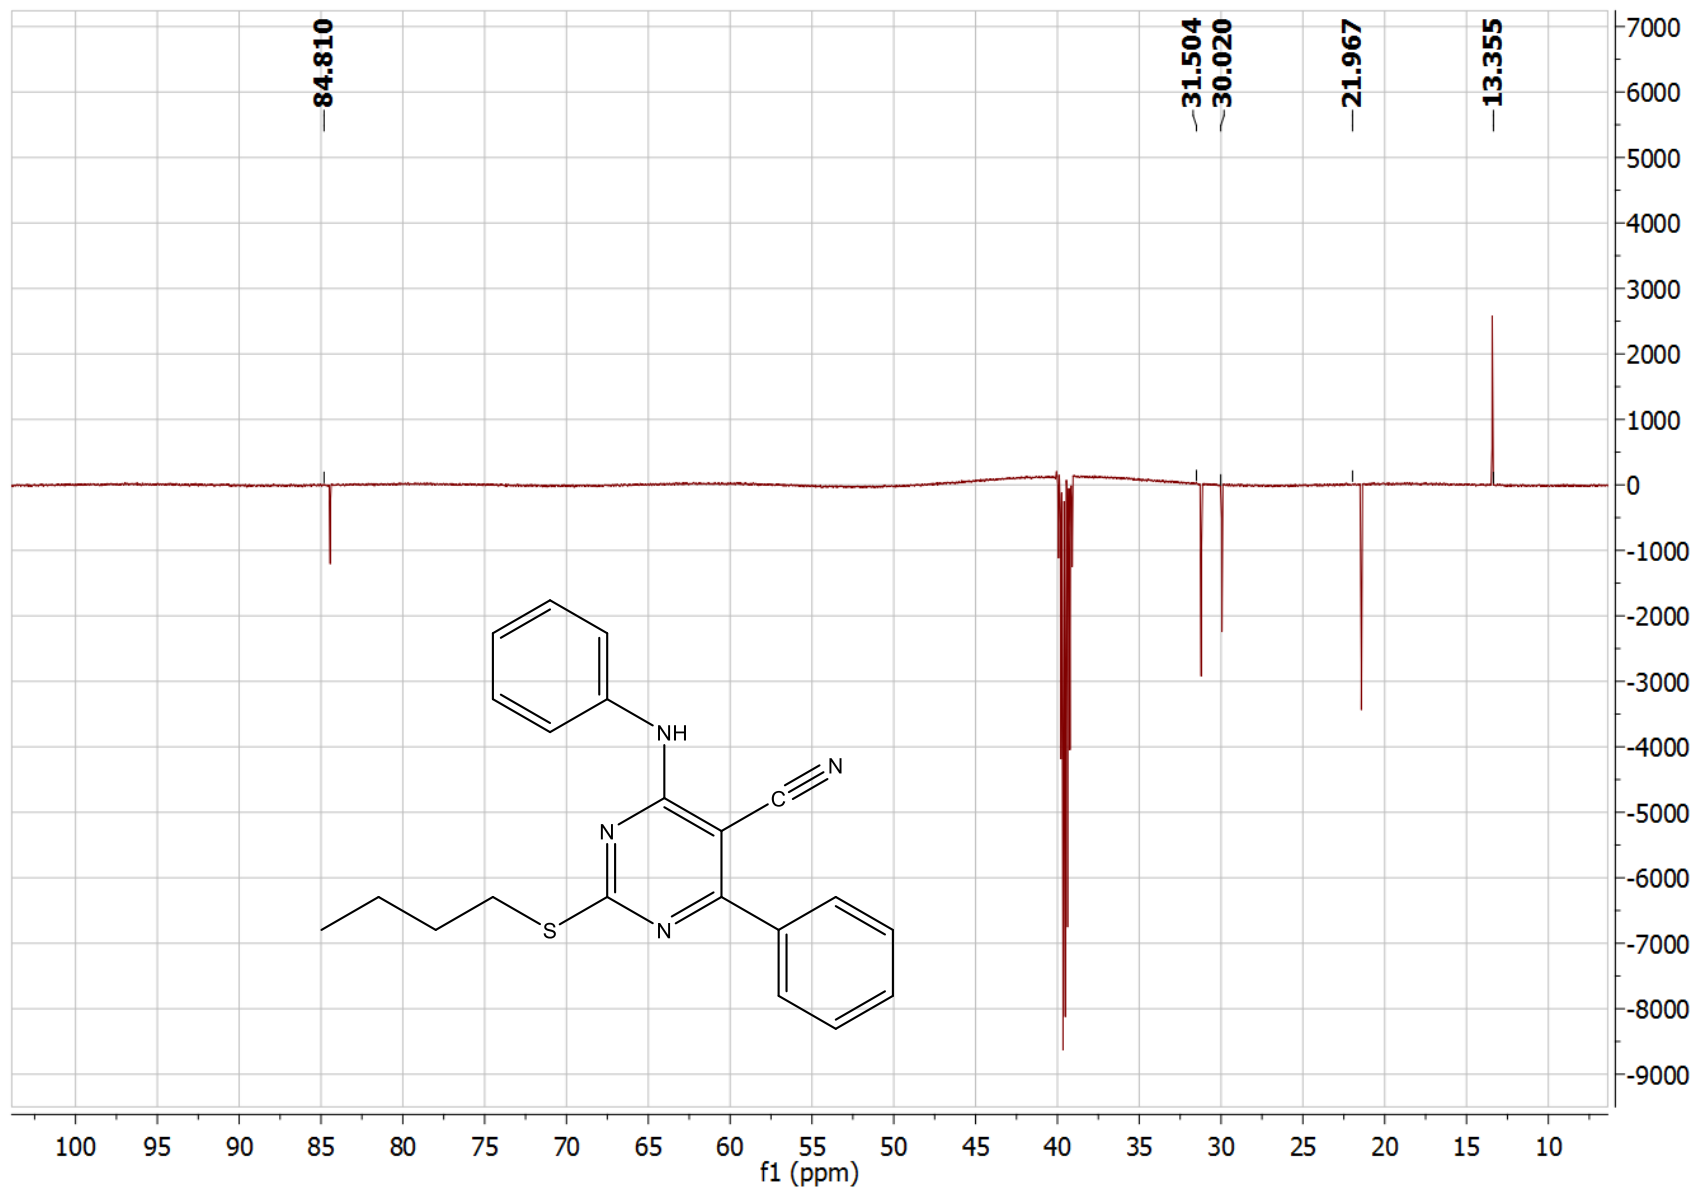

APT of compound 10<sub>b</sub>

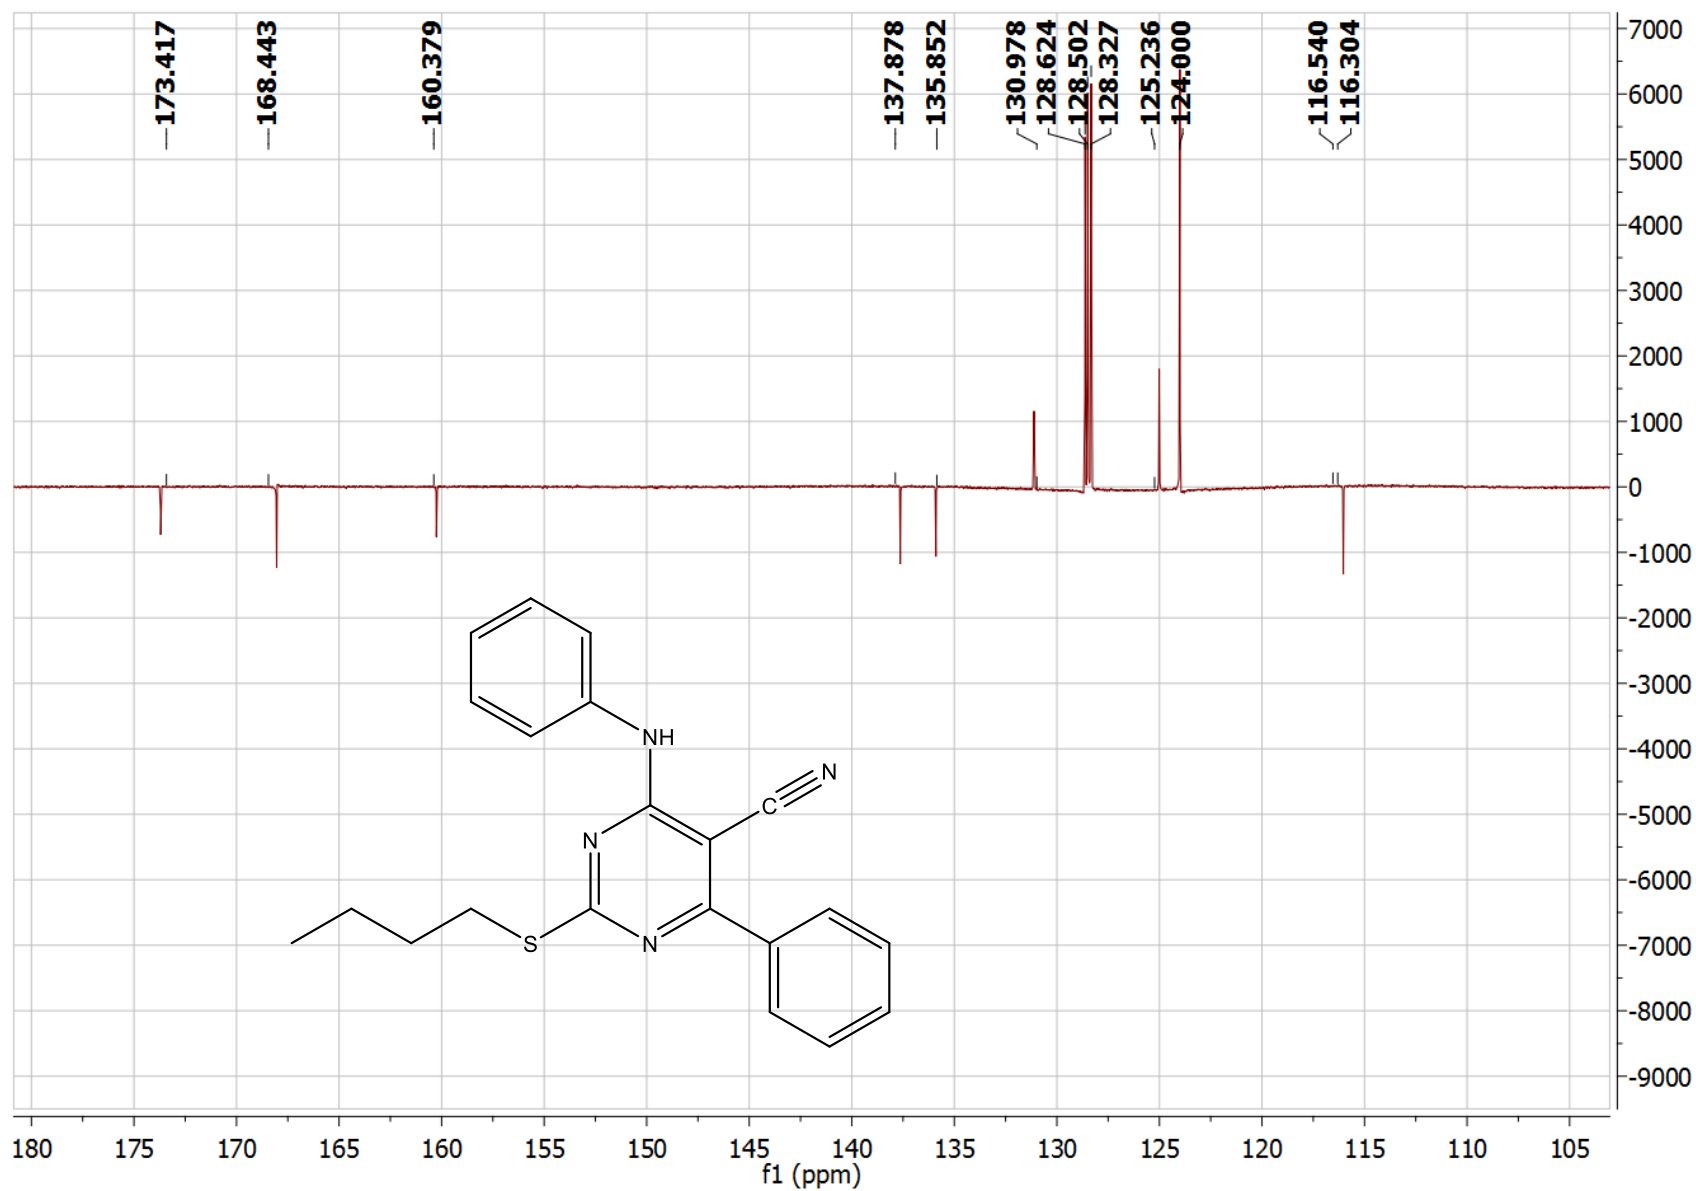

<sup>1</sup>H NMR of compound 10c

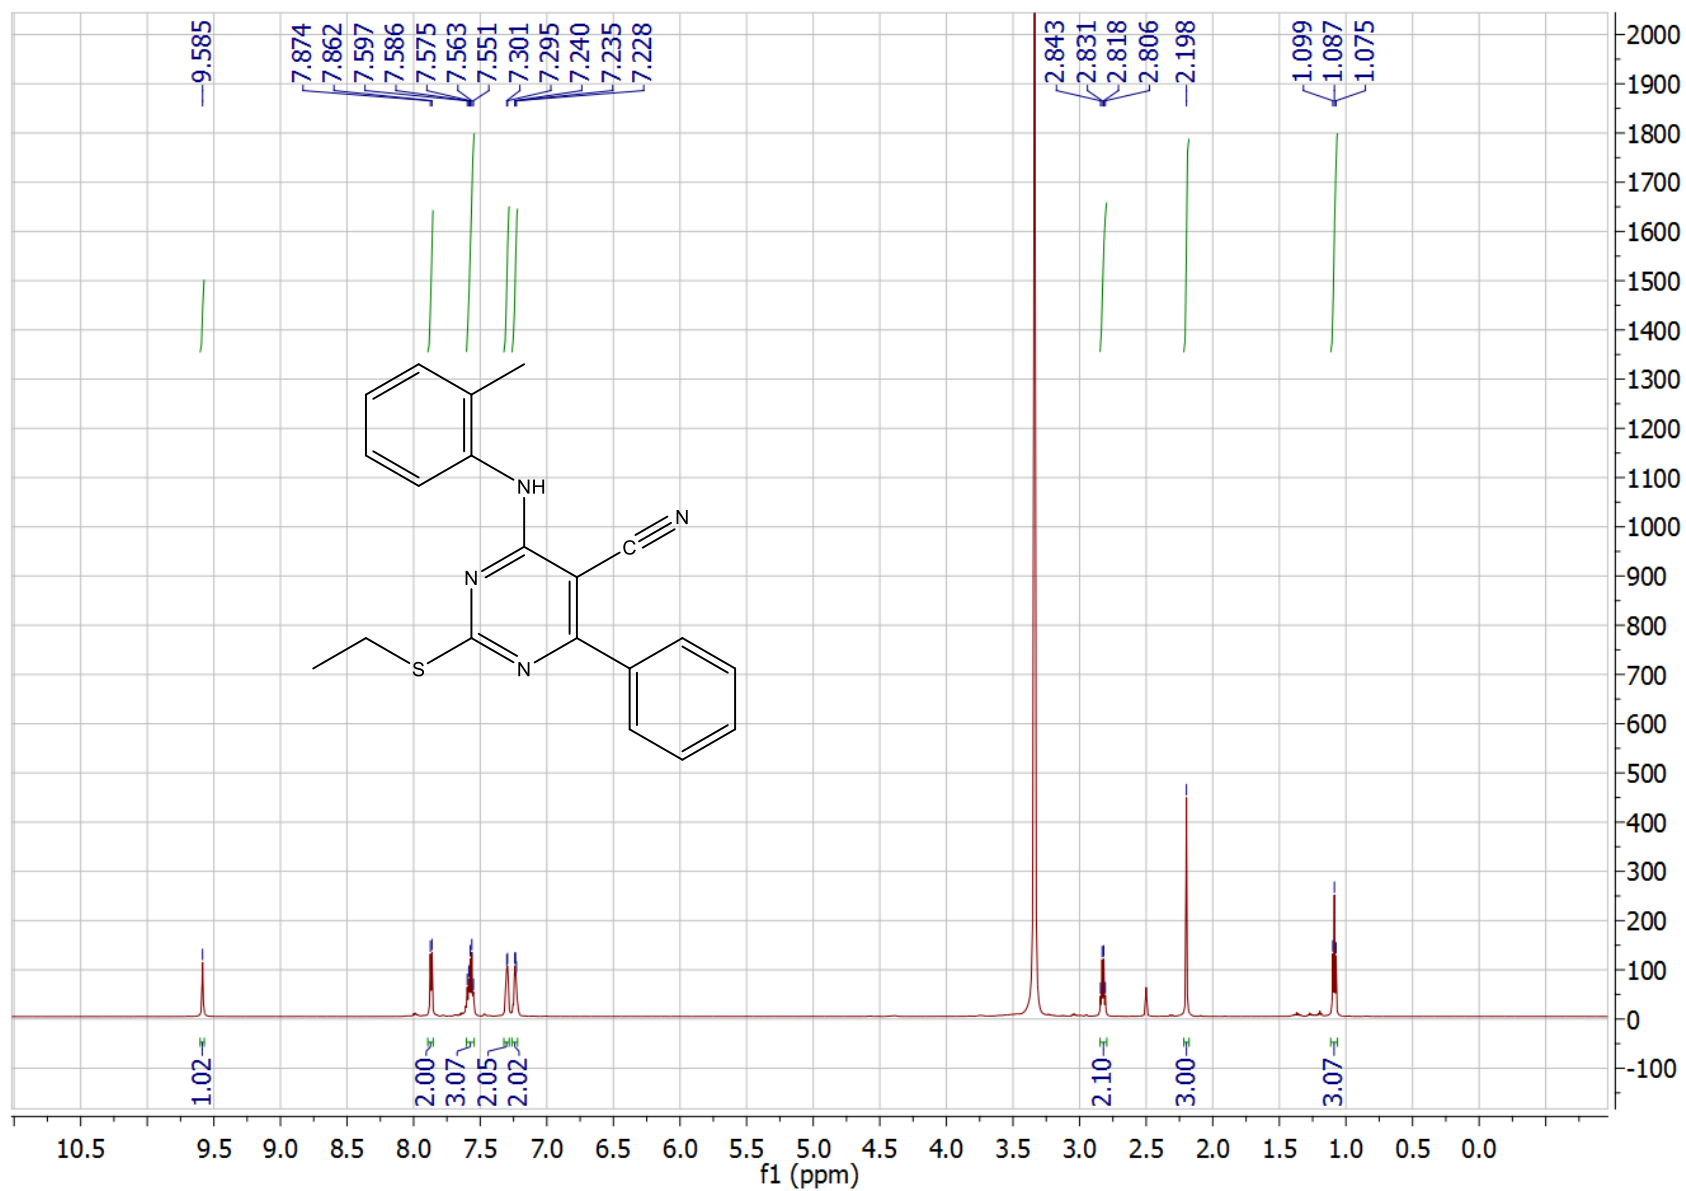

<sup>1</sup>H NMR of compound 10c

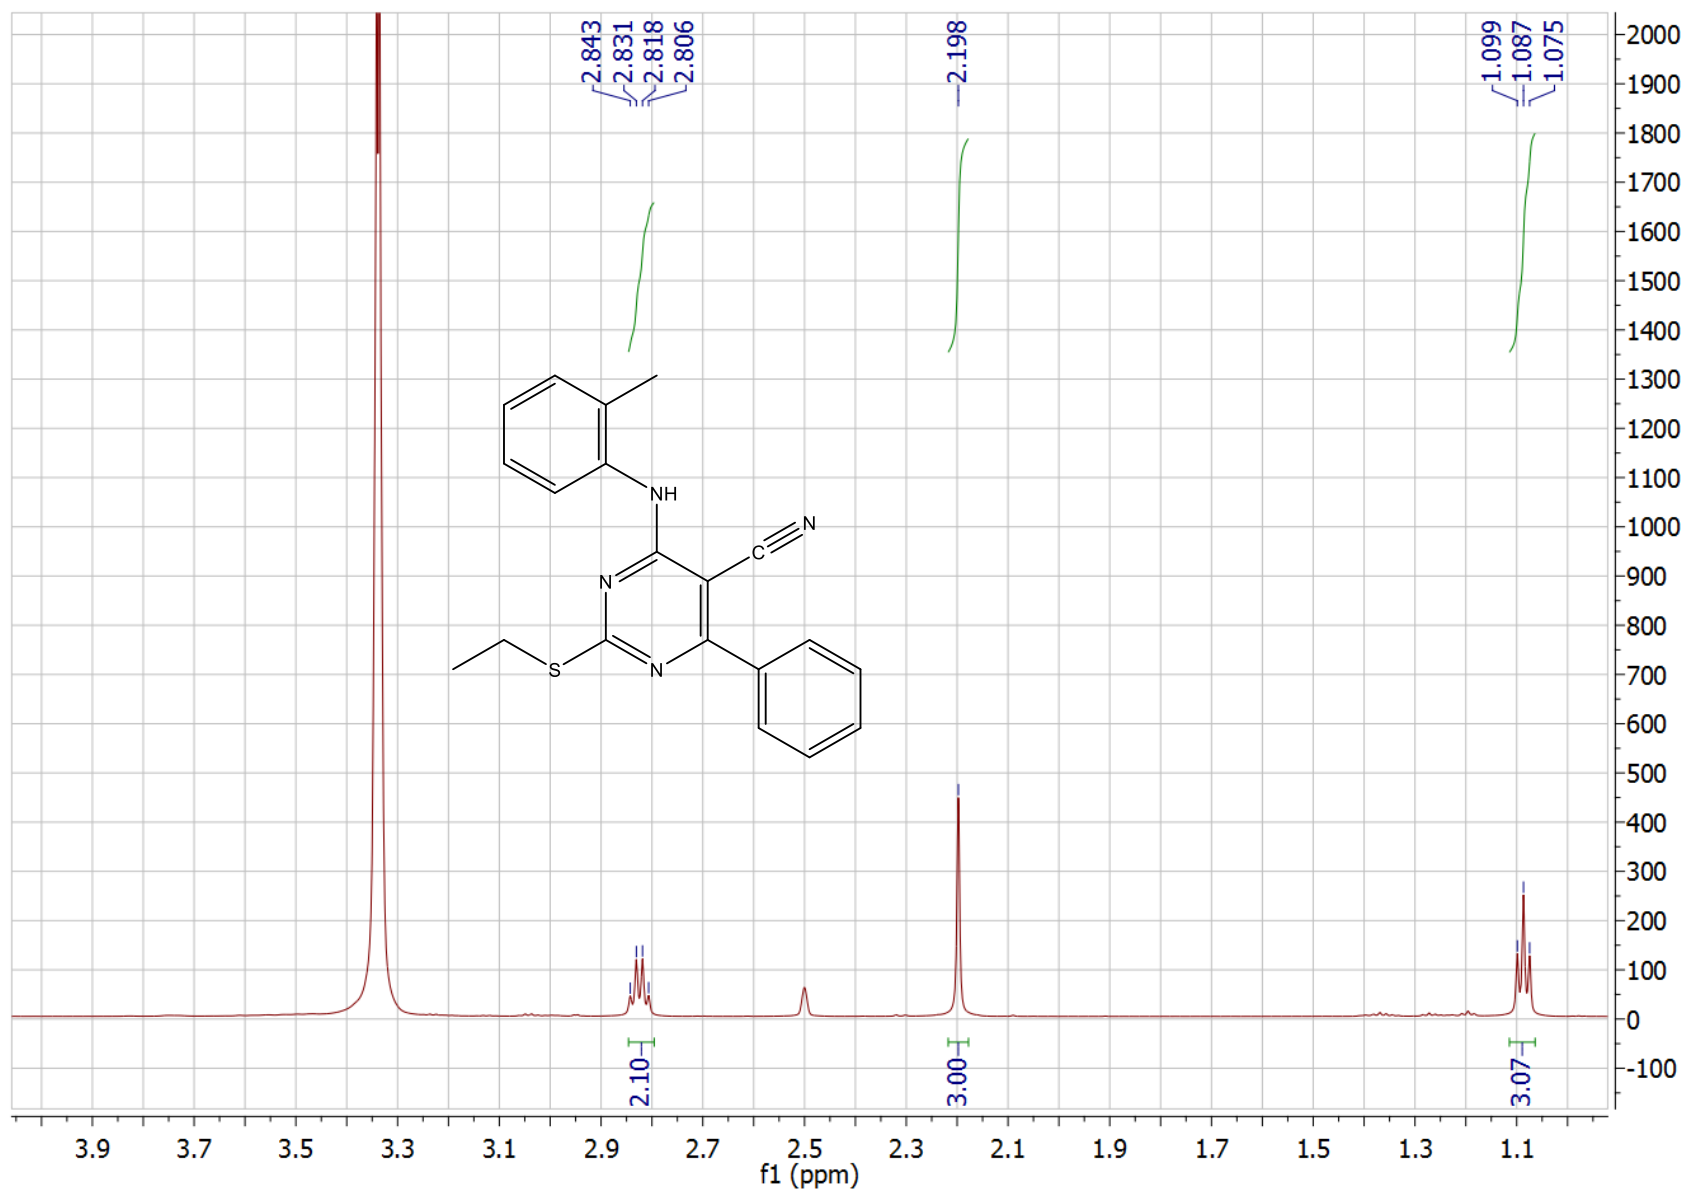

<sup>1</sup>H NMR of compound 10c

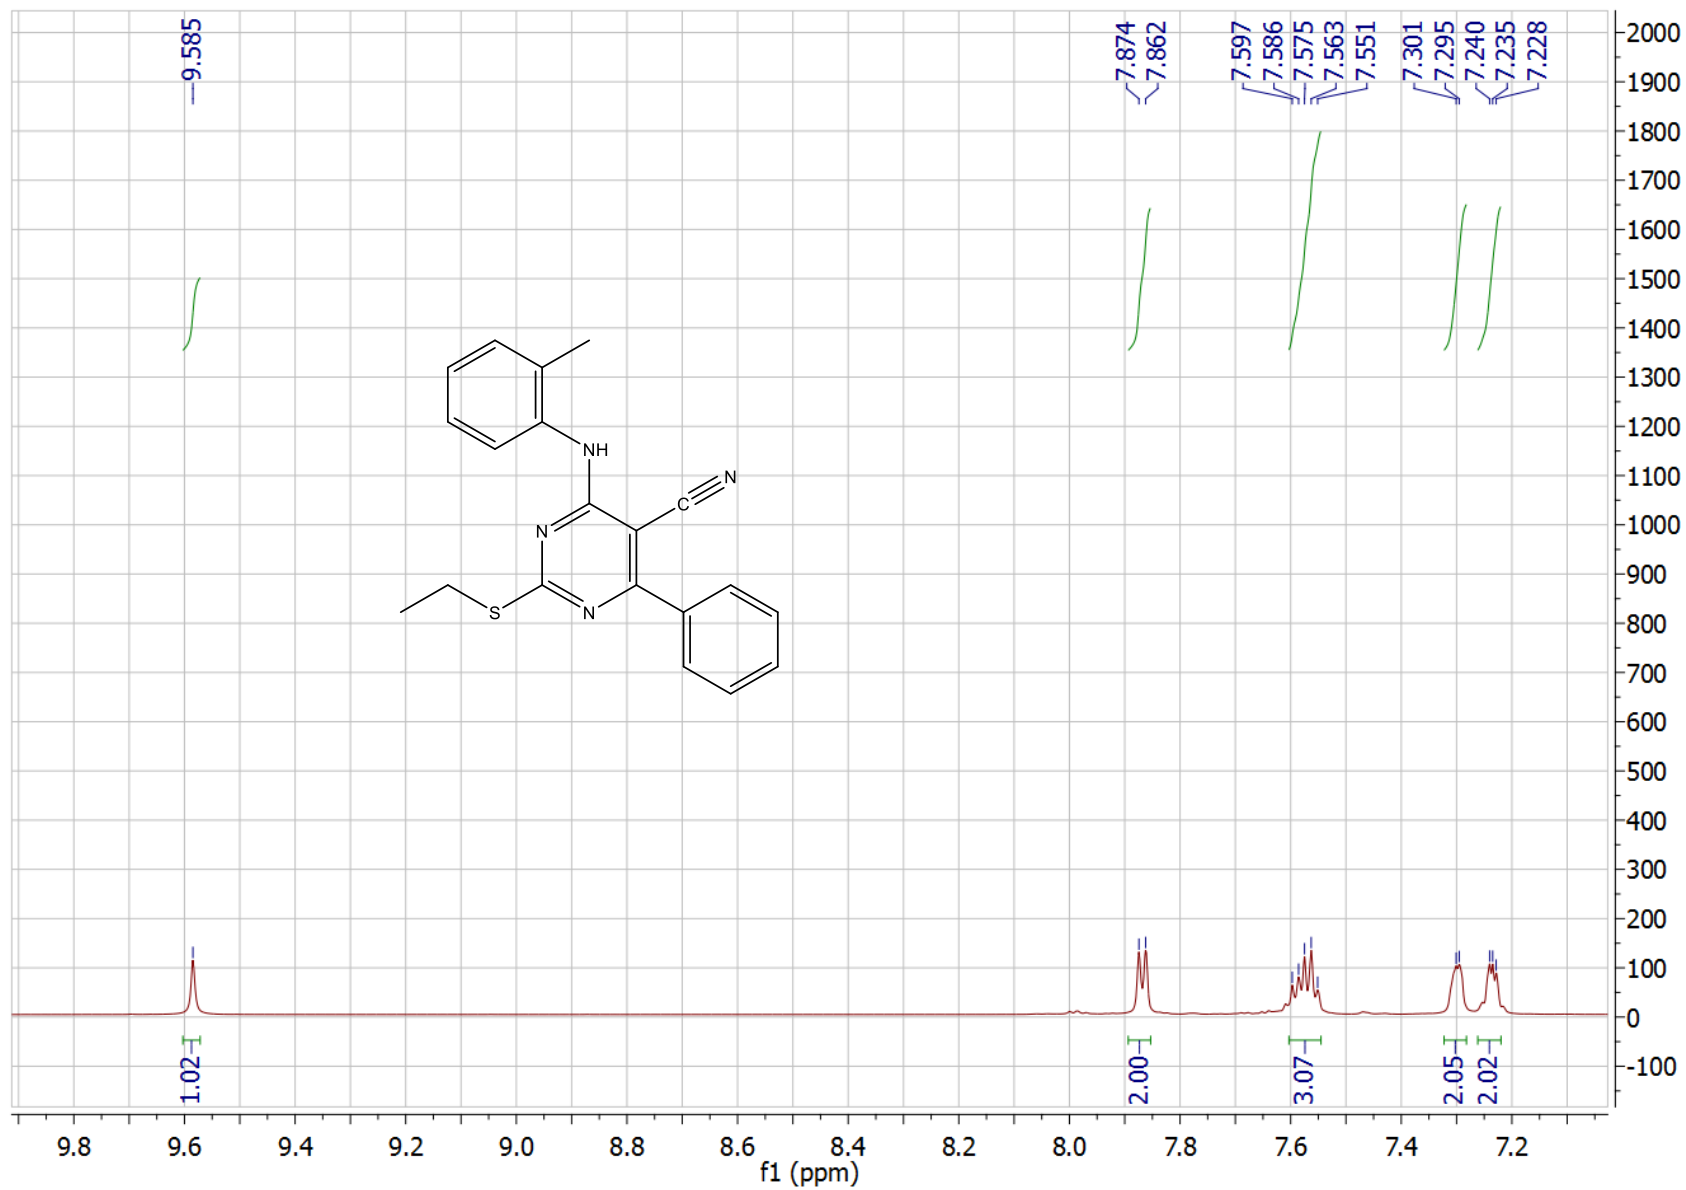



<sup>13</sup>C NMR of compound 10c

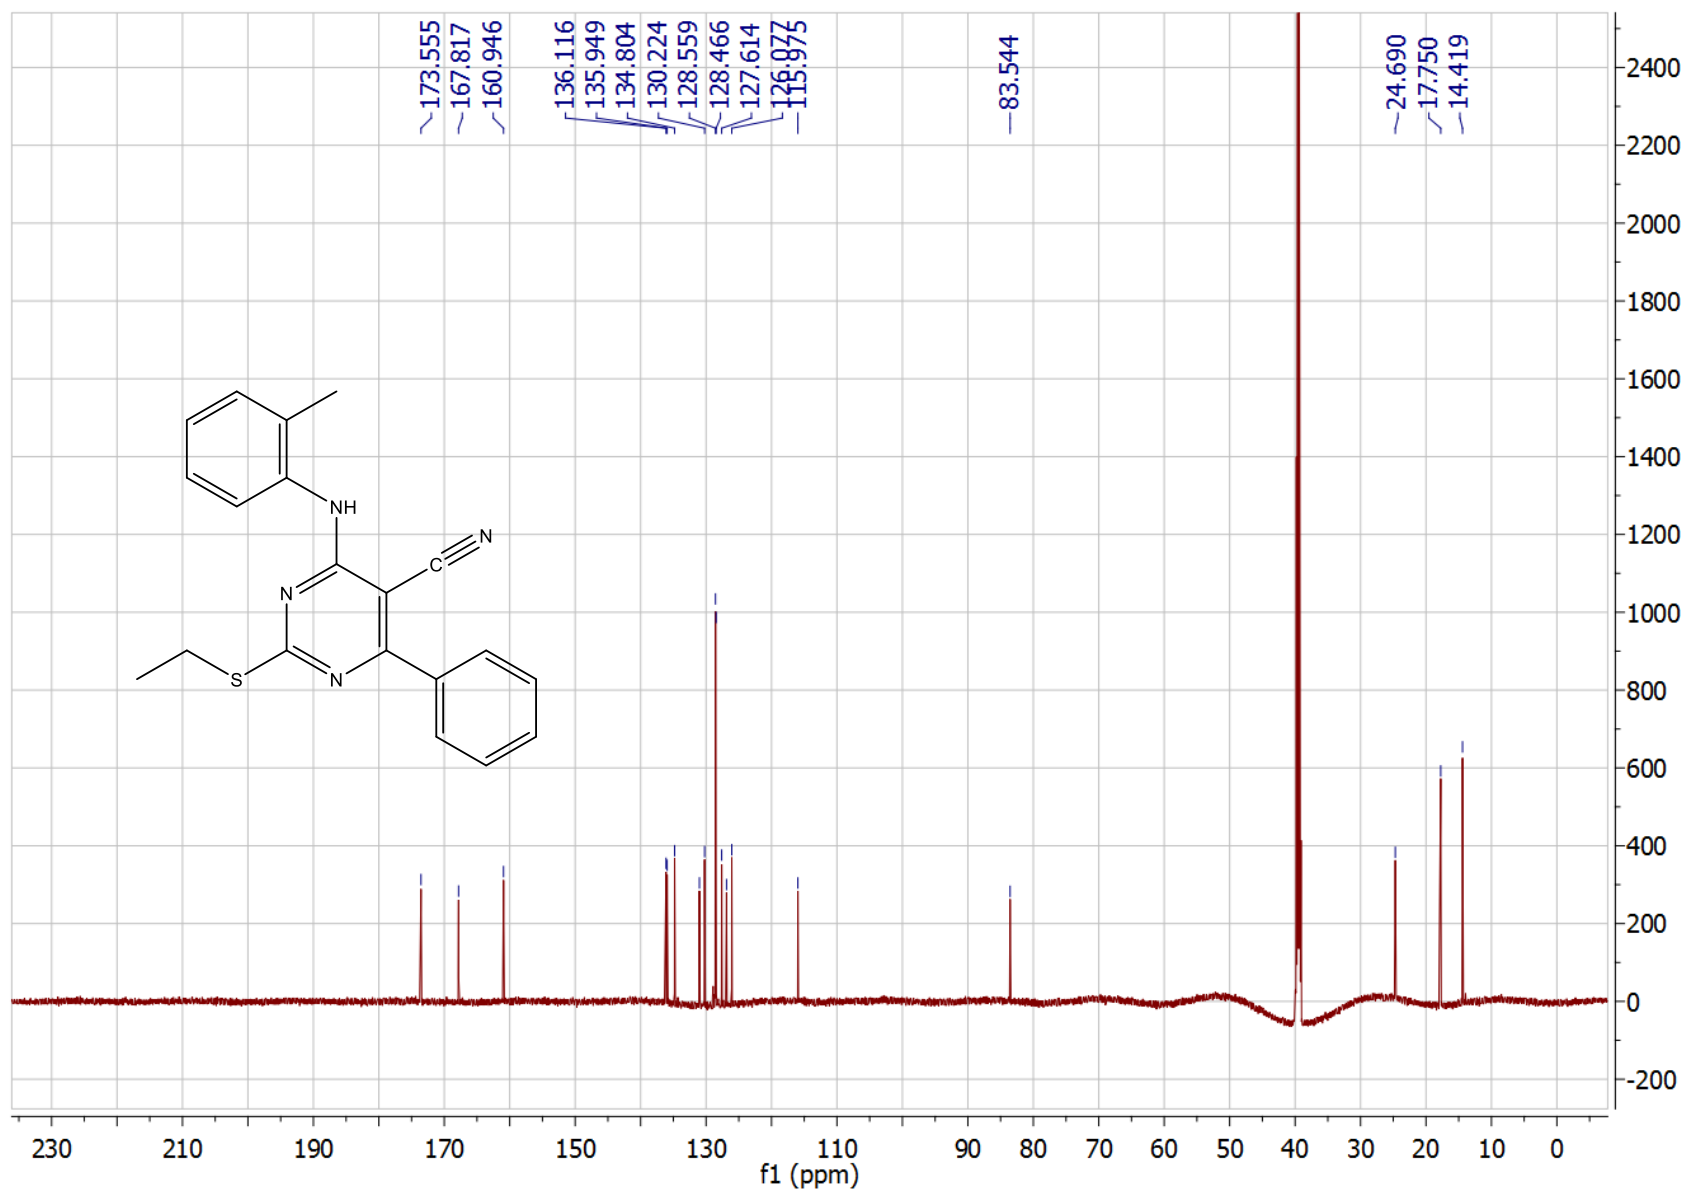

**<sup>13</sup>C NMR of compound 10c**

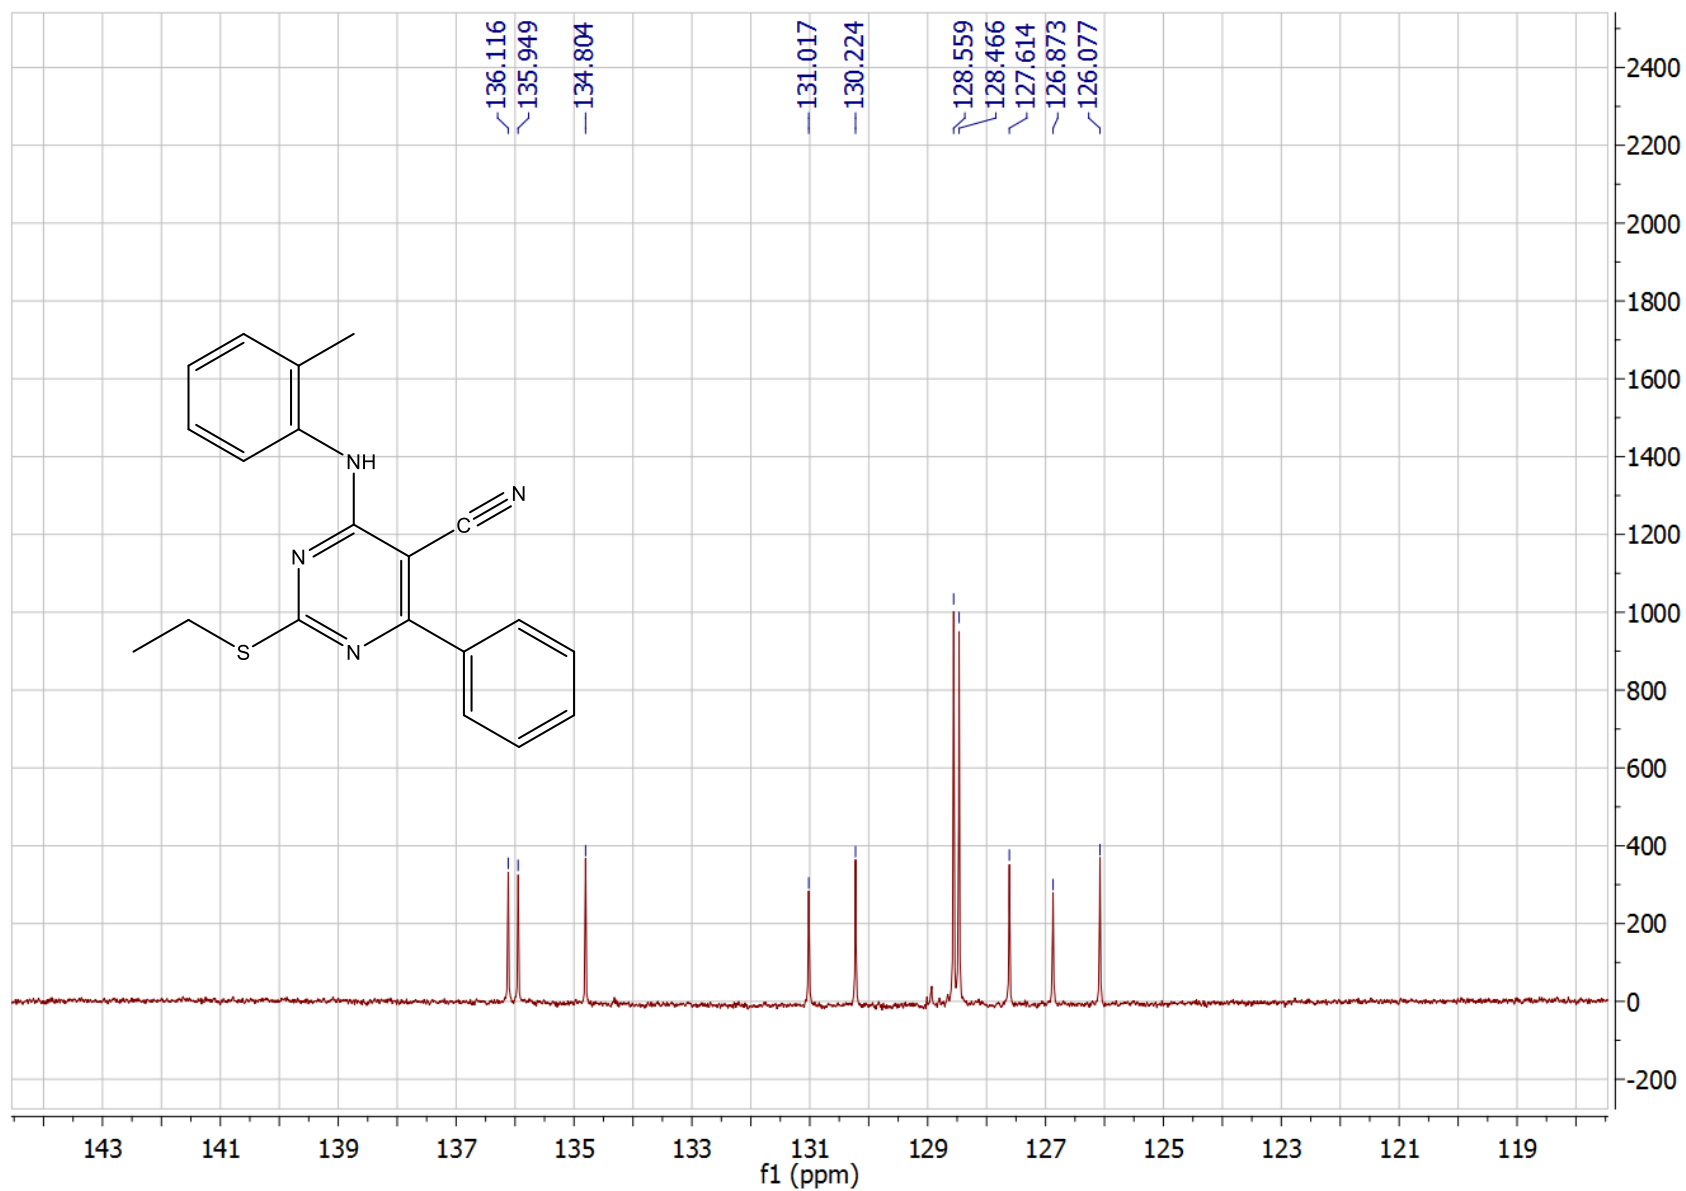

APT of compound 10c

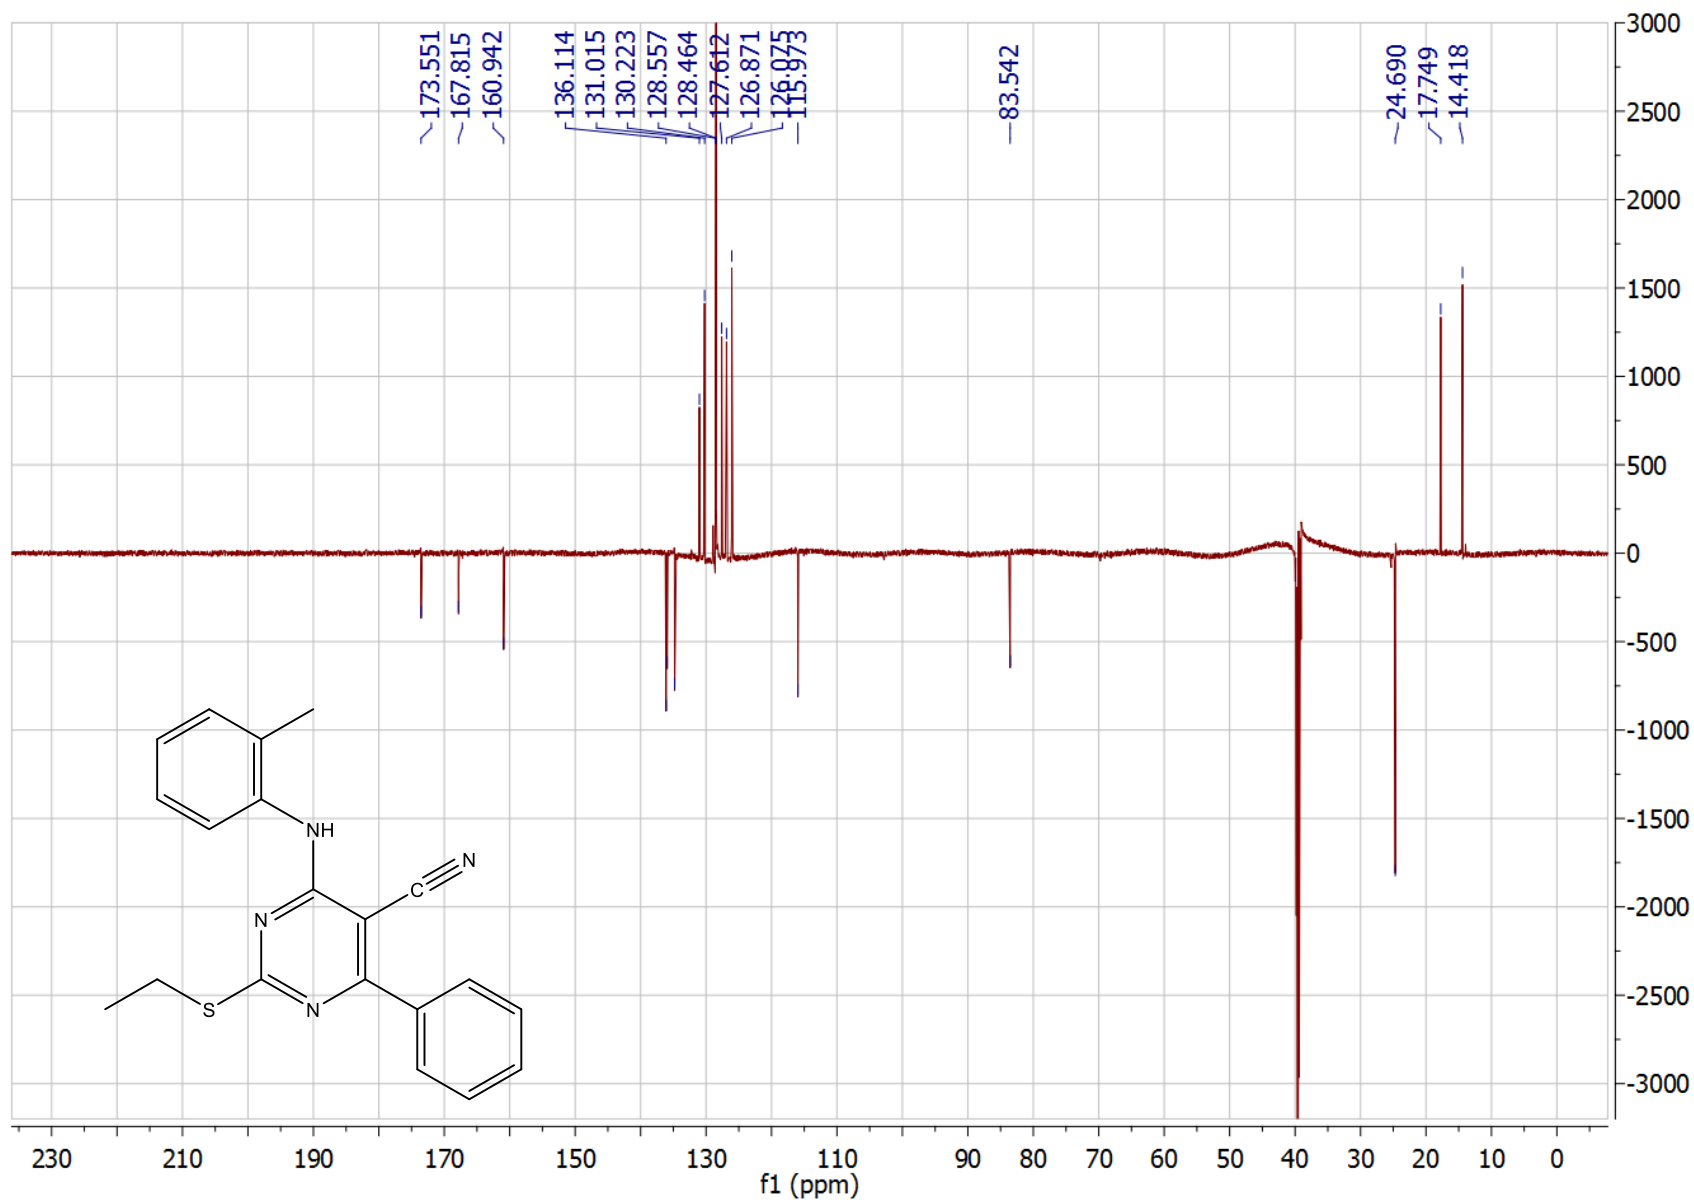

# APT of compound 10c

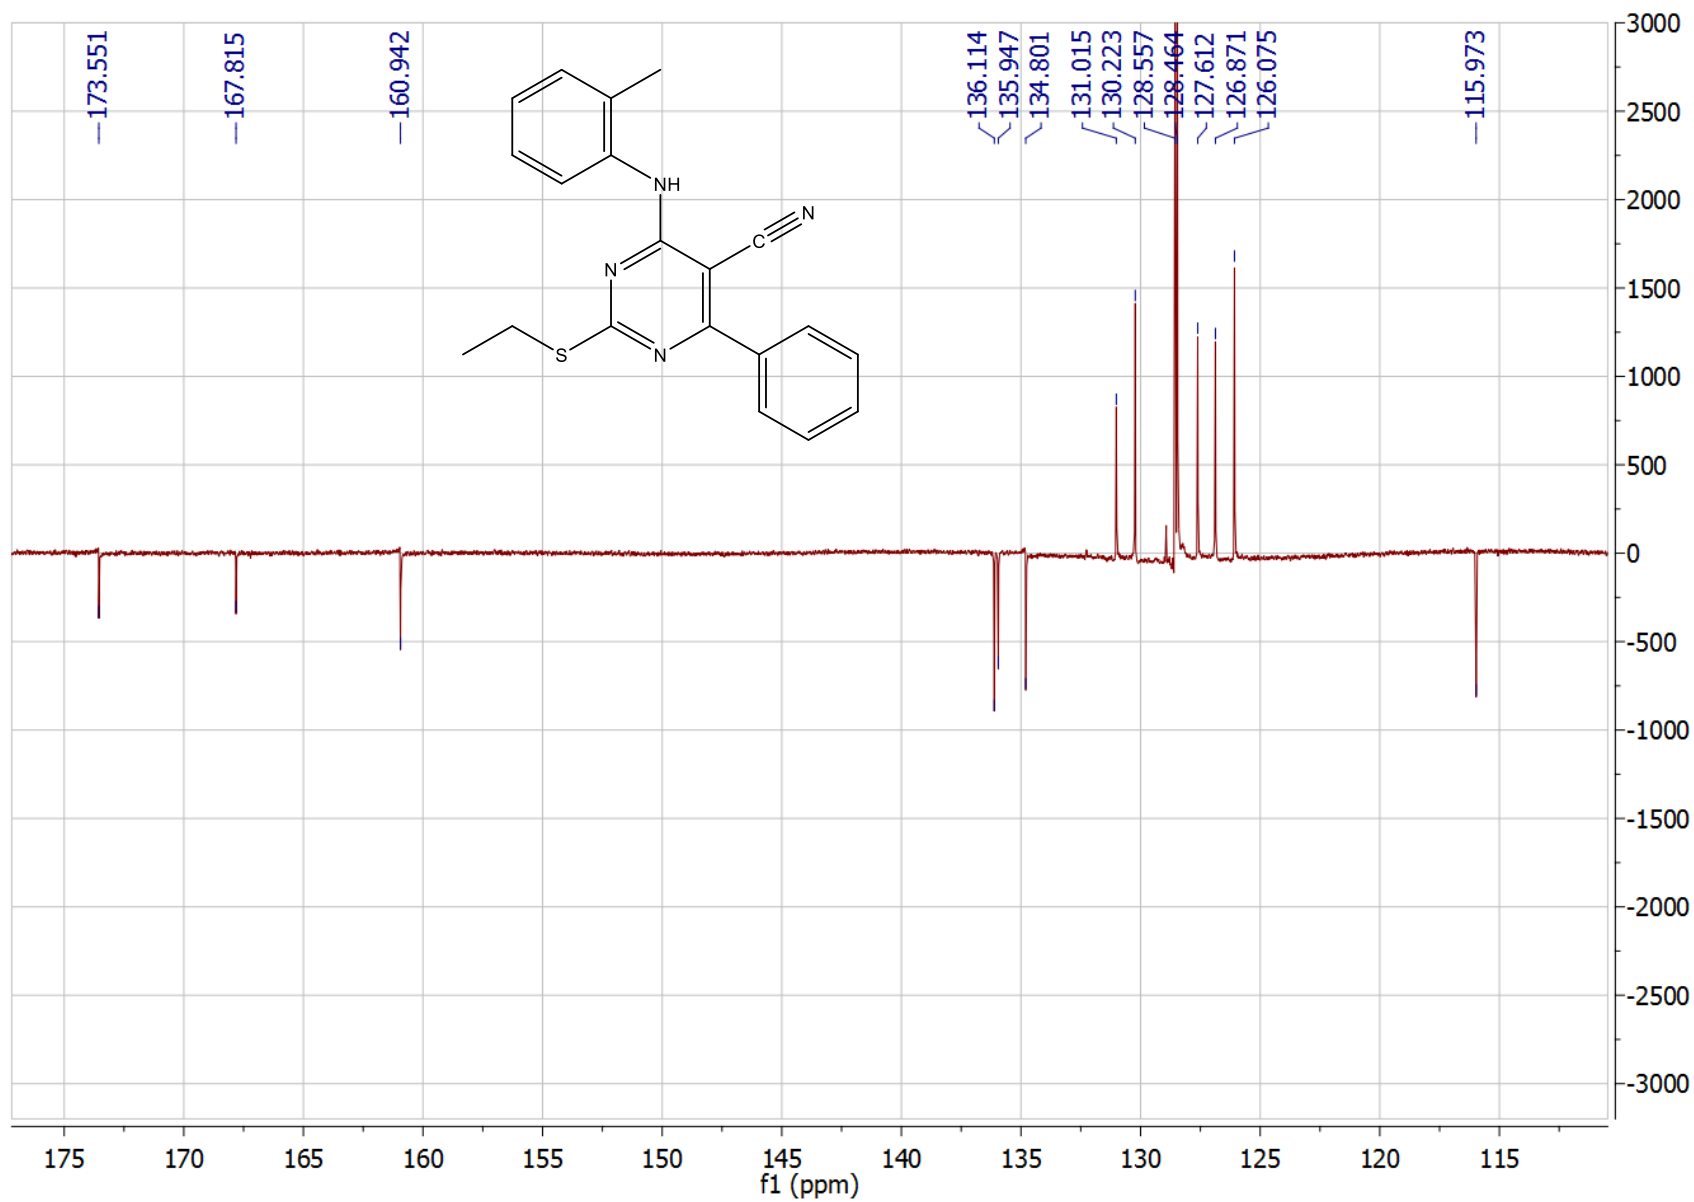

<sup>1</sup>H NMR of compound 10<sub>d</sub>

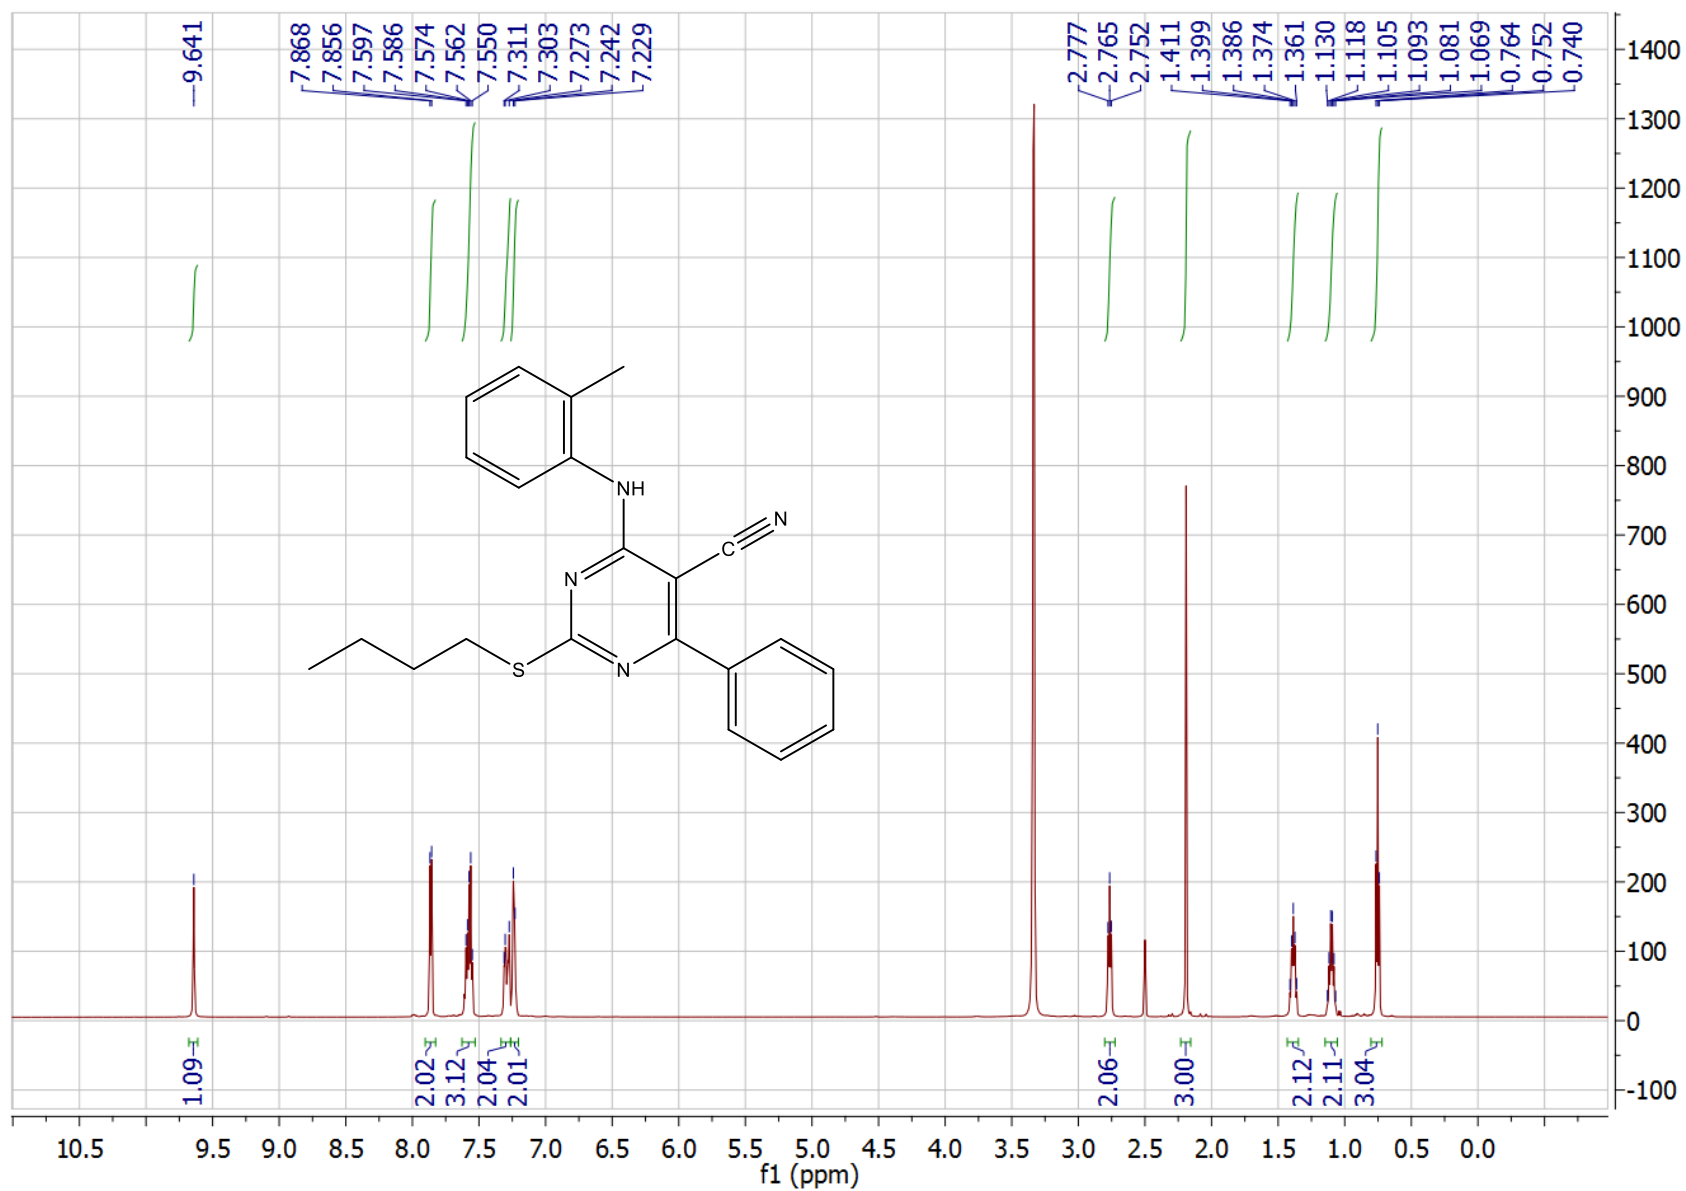

<sup>1</sup>H NMR of compound 10<sub>d</sub>

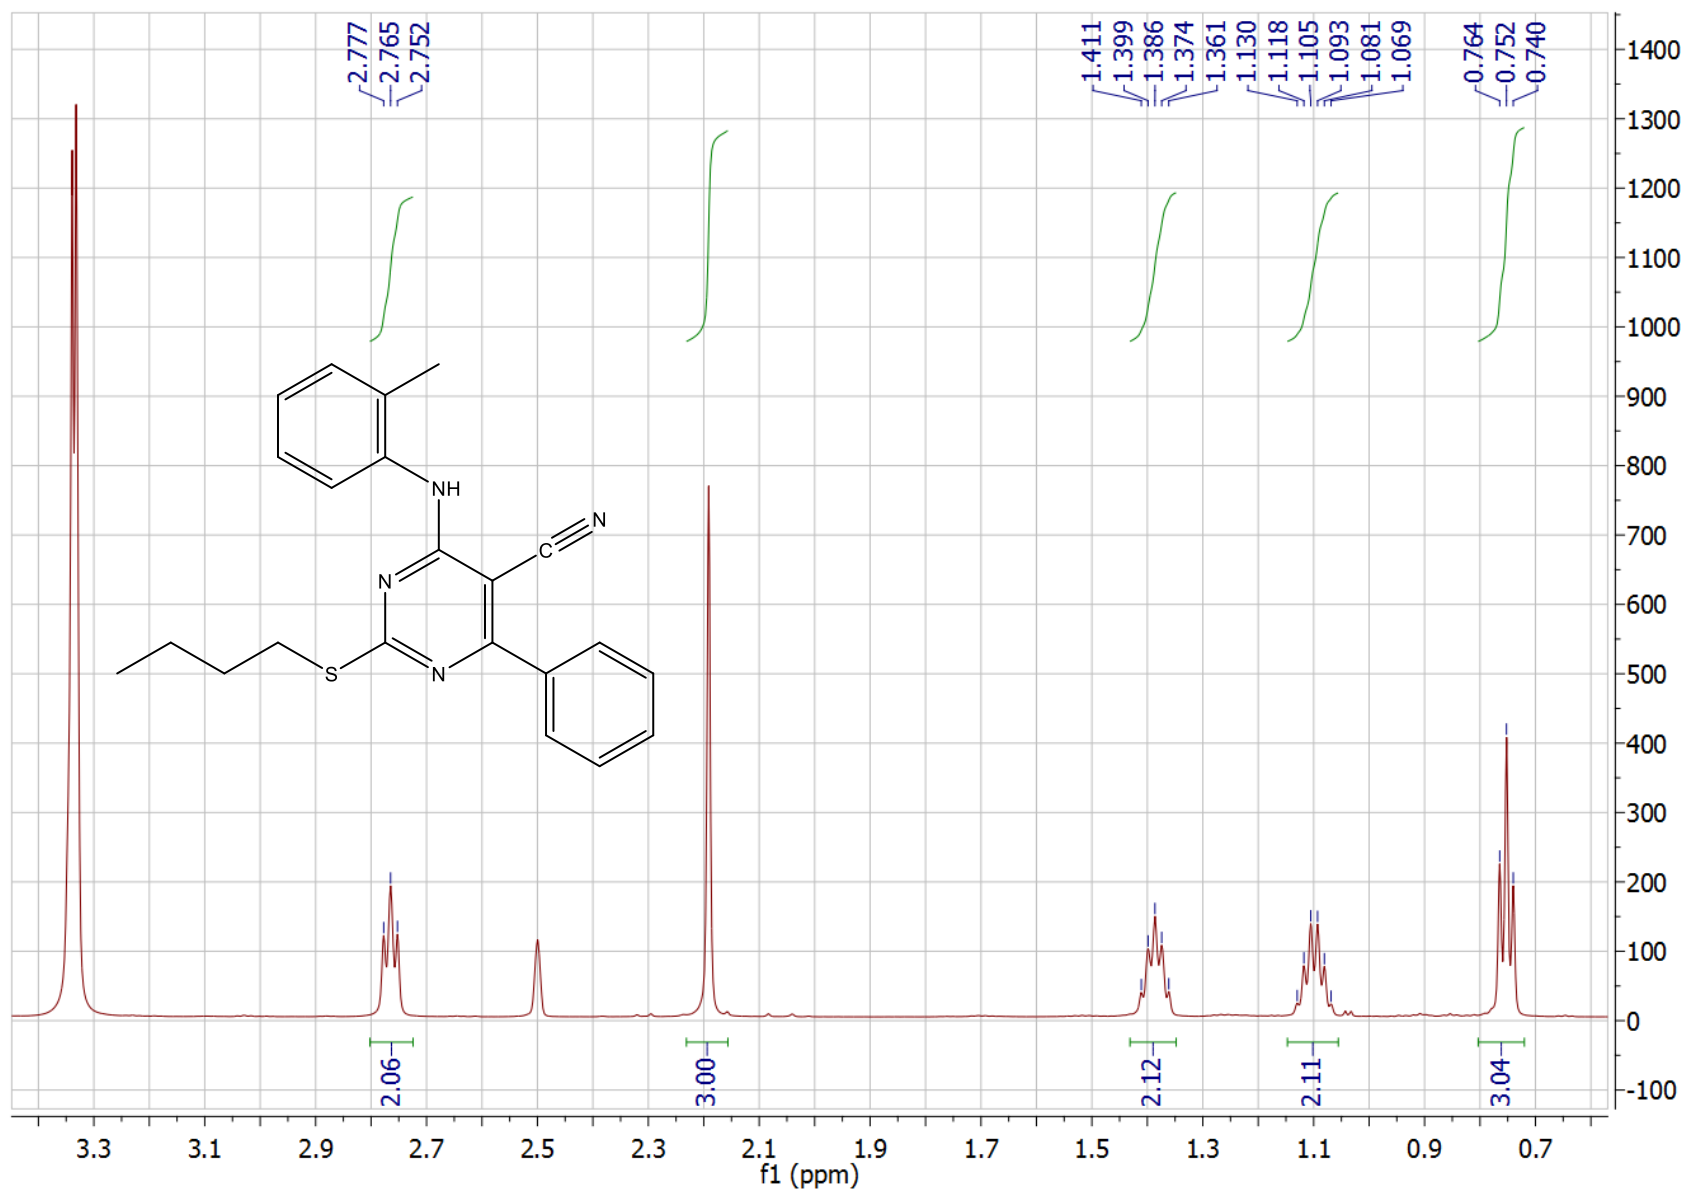

<sup>1</sup>H NMR of compound 10<sub>d</sub>

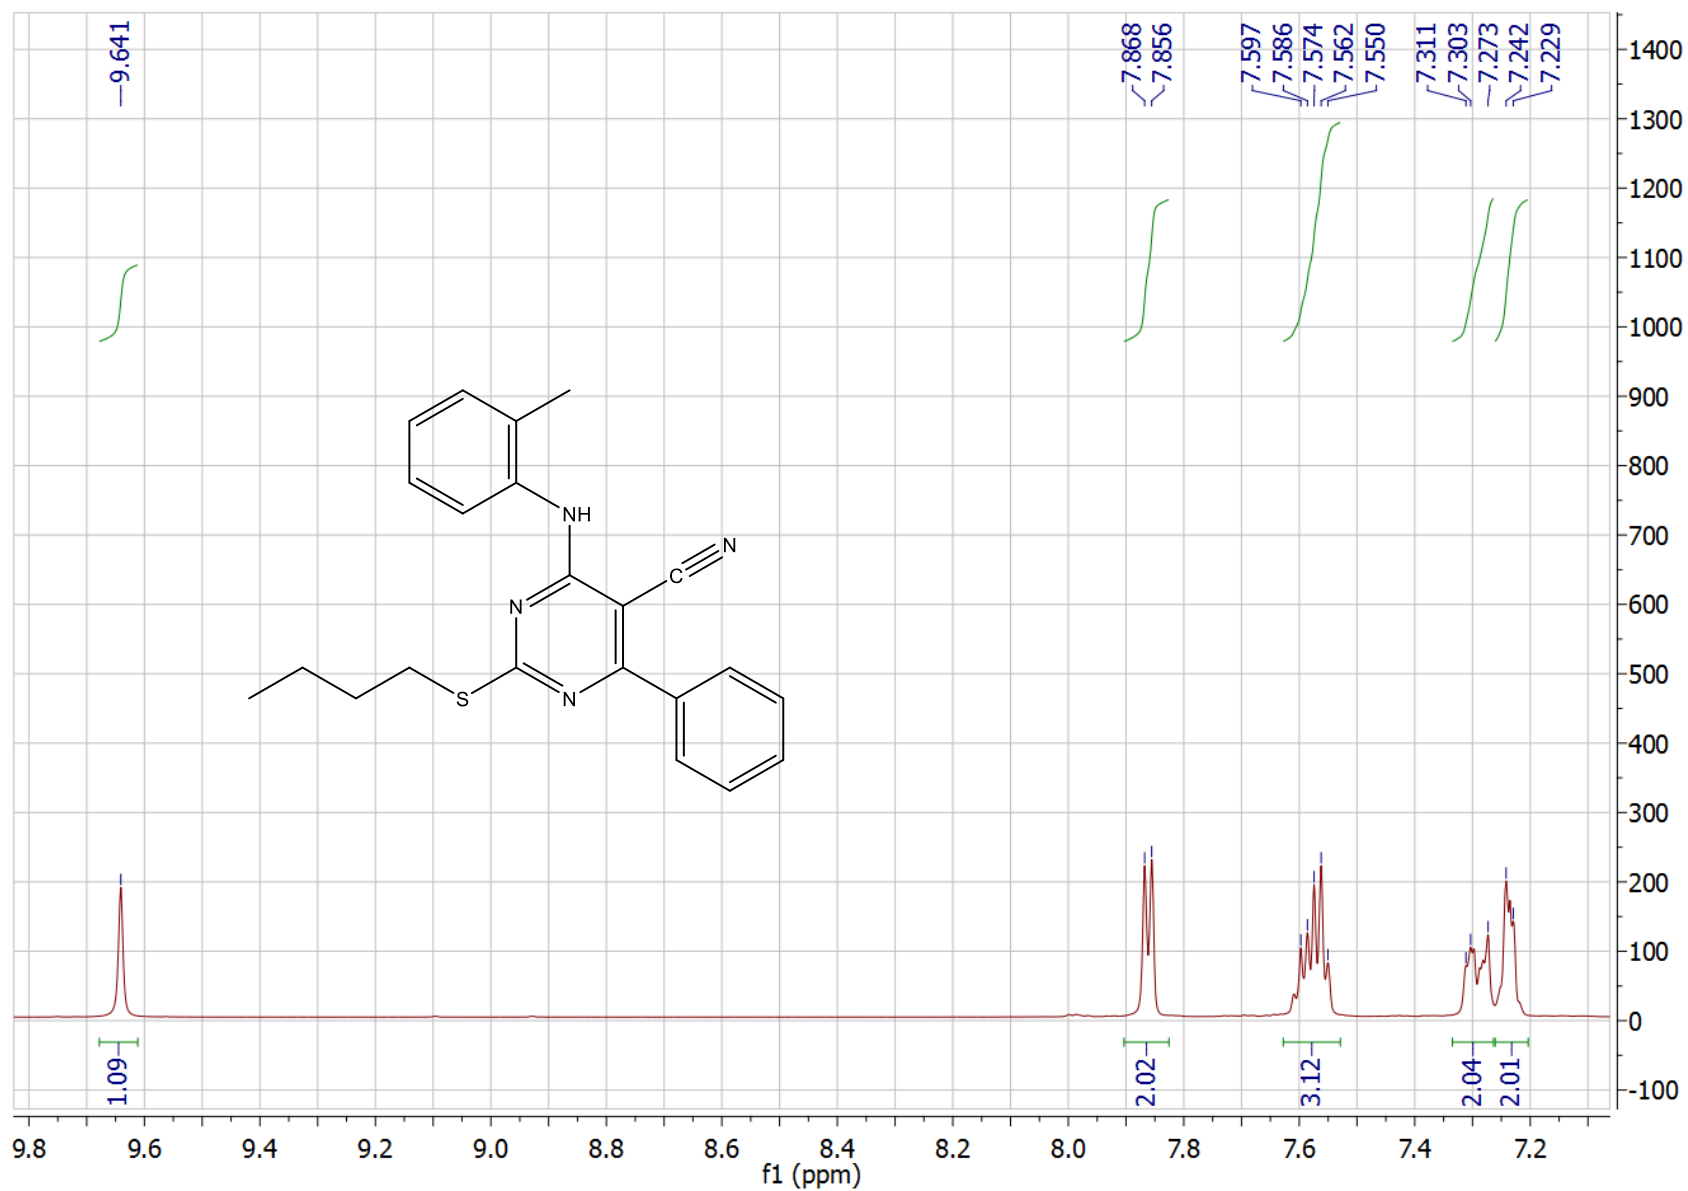

<sup>13</sup>C NMR of compound 10<sub>d</sub>

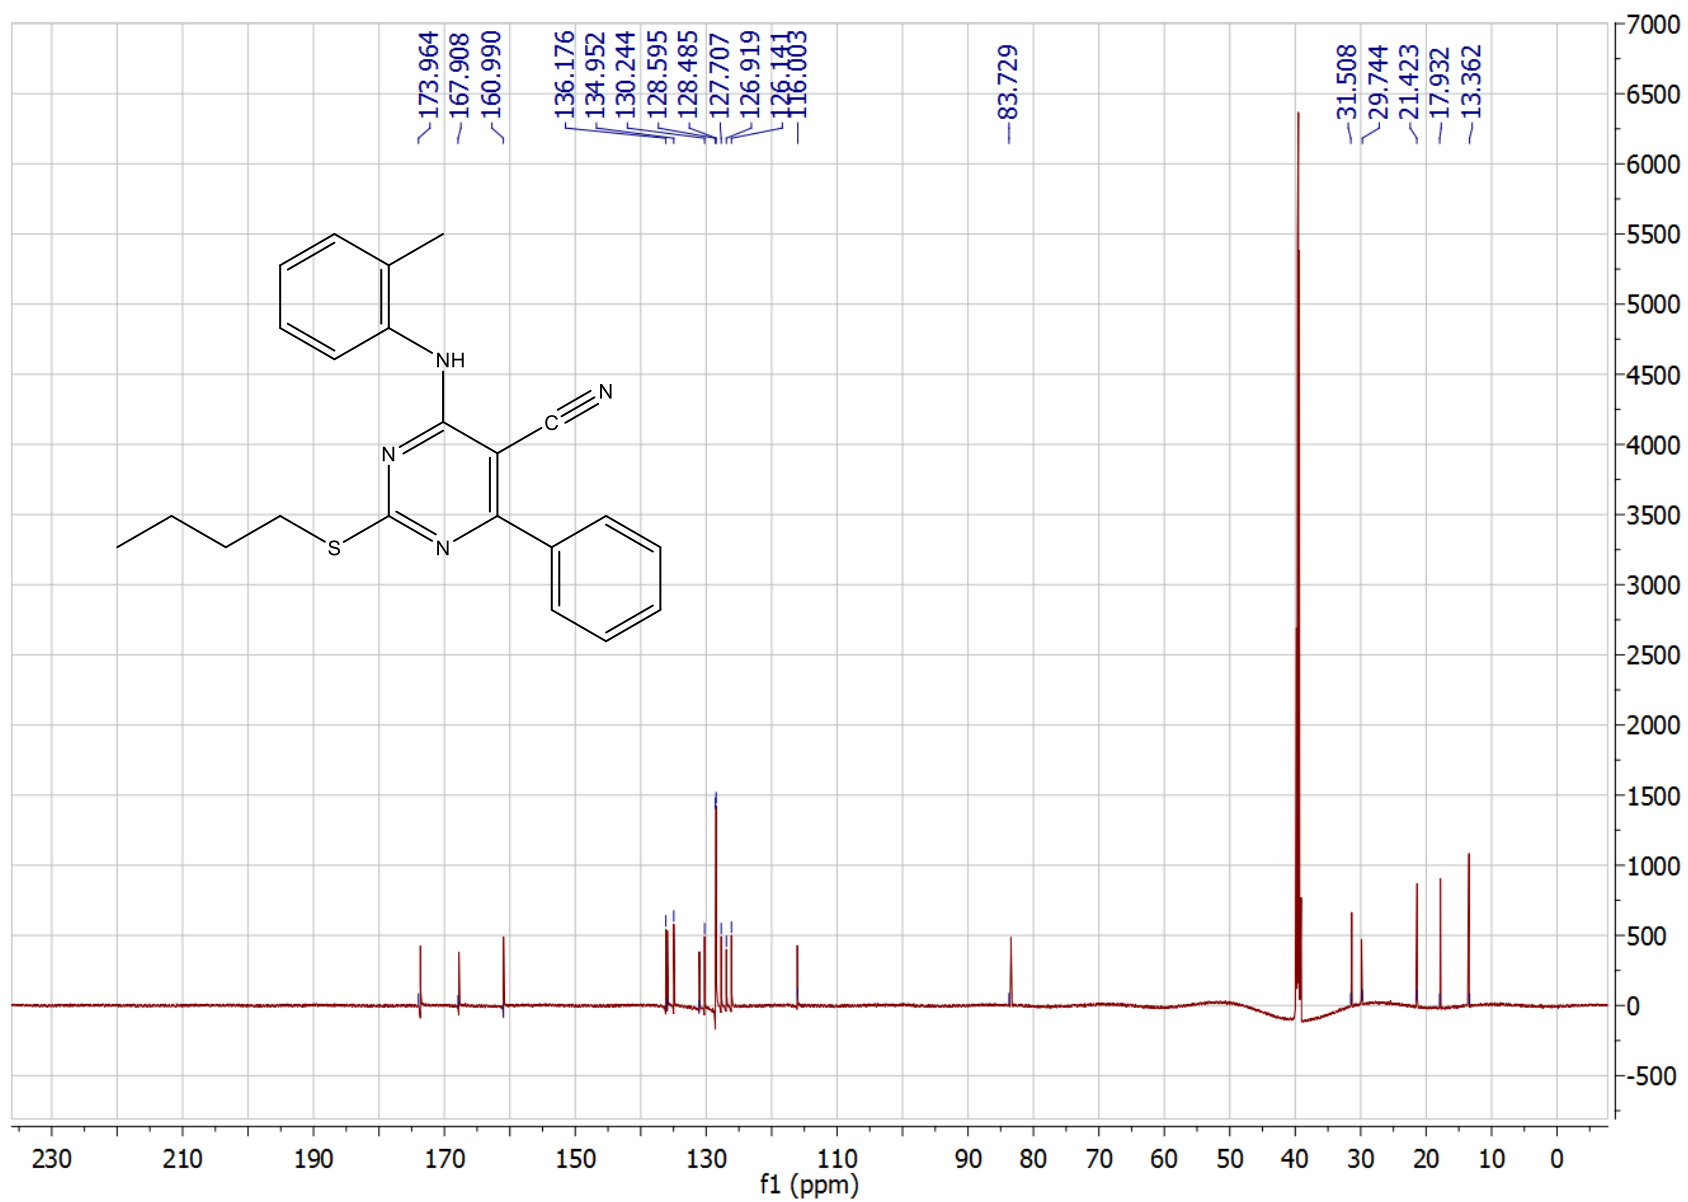



<sup>13</sup>C NMR of compound 10<sub>d</sub>

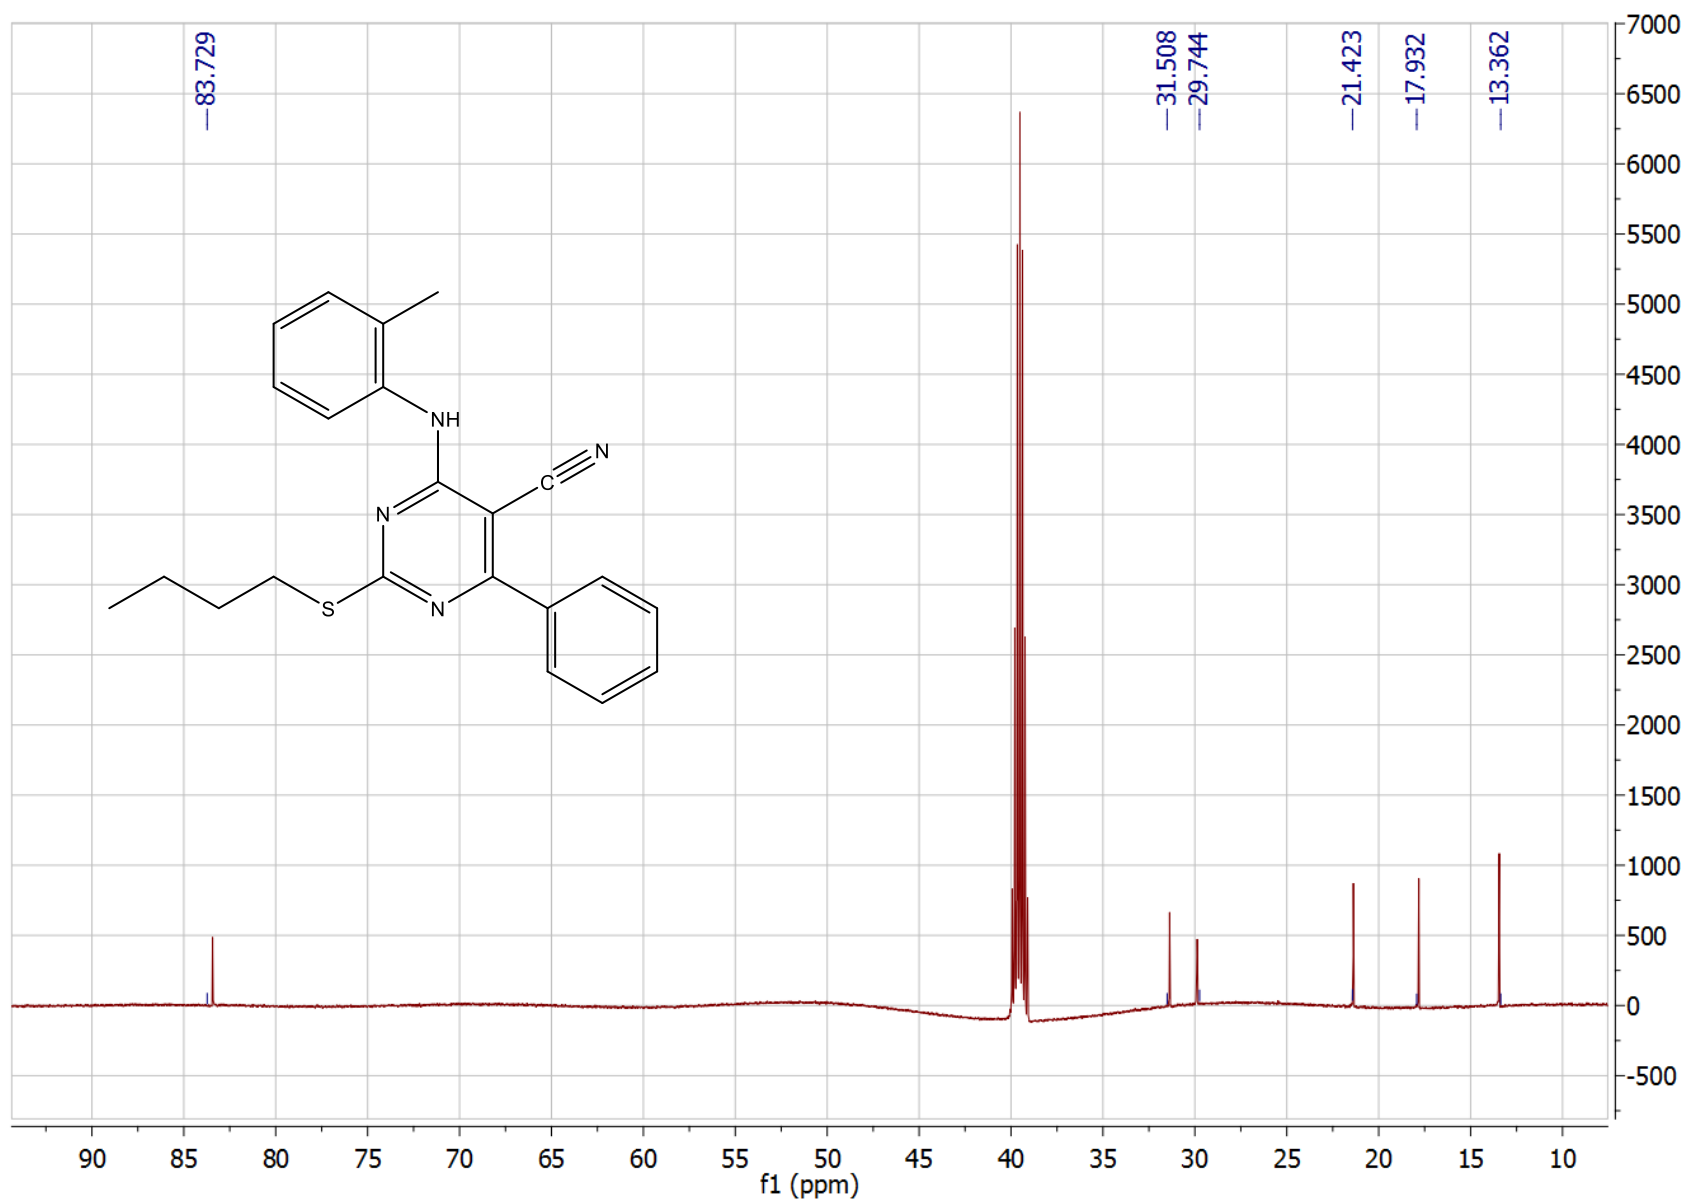

<sup>13</sup>C NMR of compound 10<sub>d</sub>

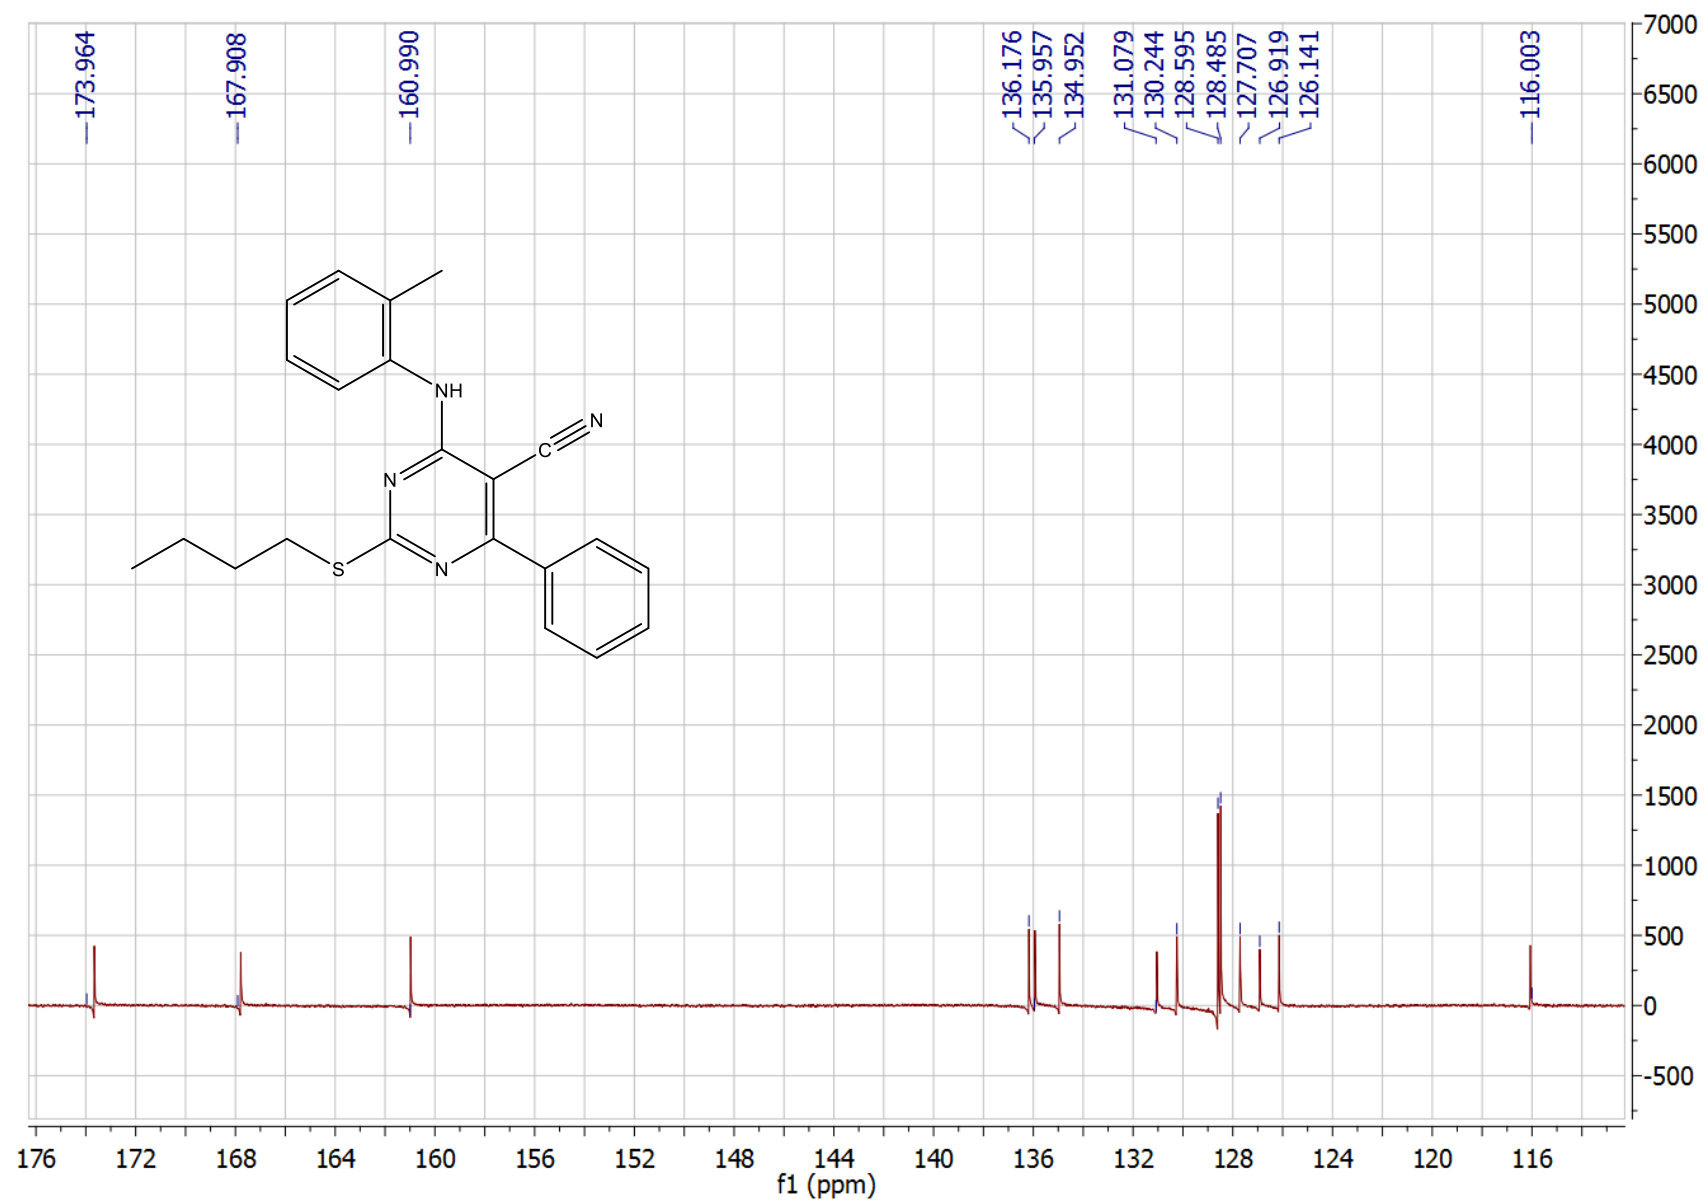

APT of compound 10<sub>d</sub>

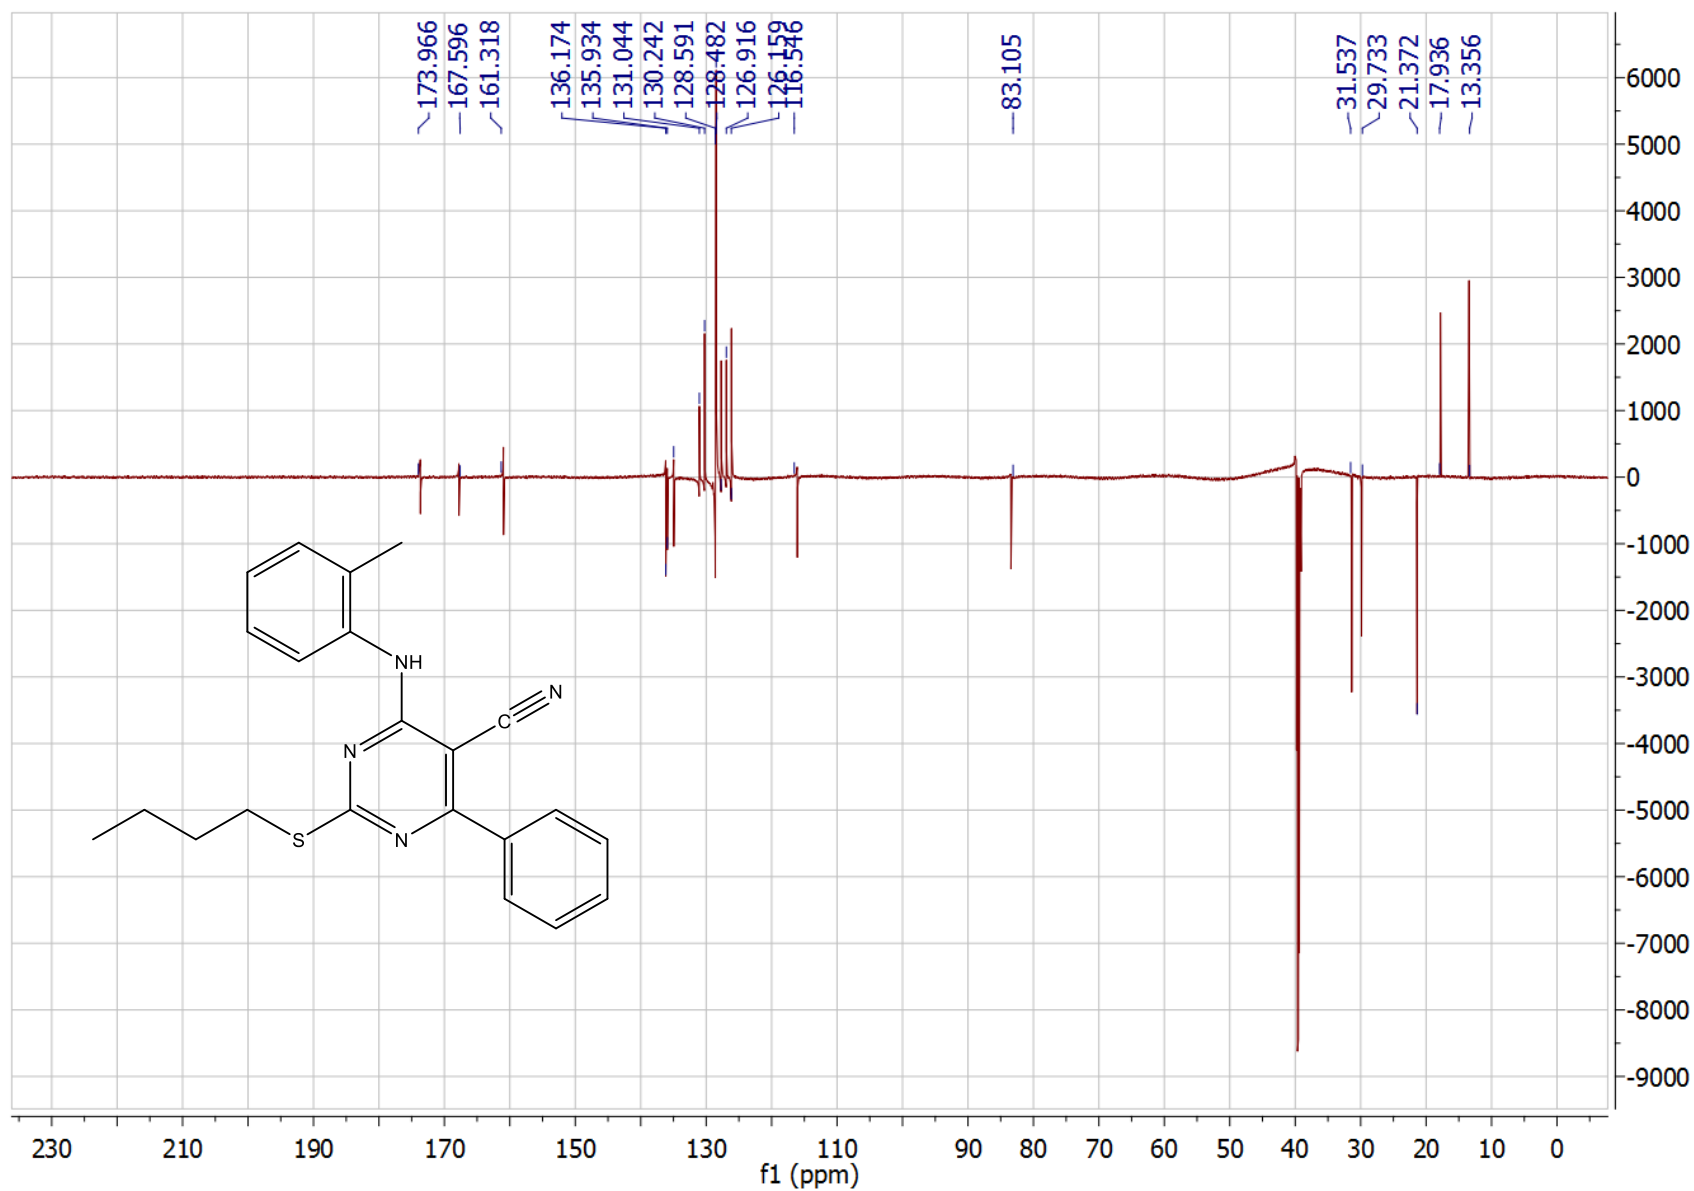

APT of compound 10<sub>d</sub>

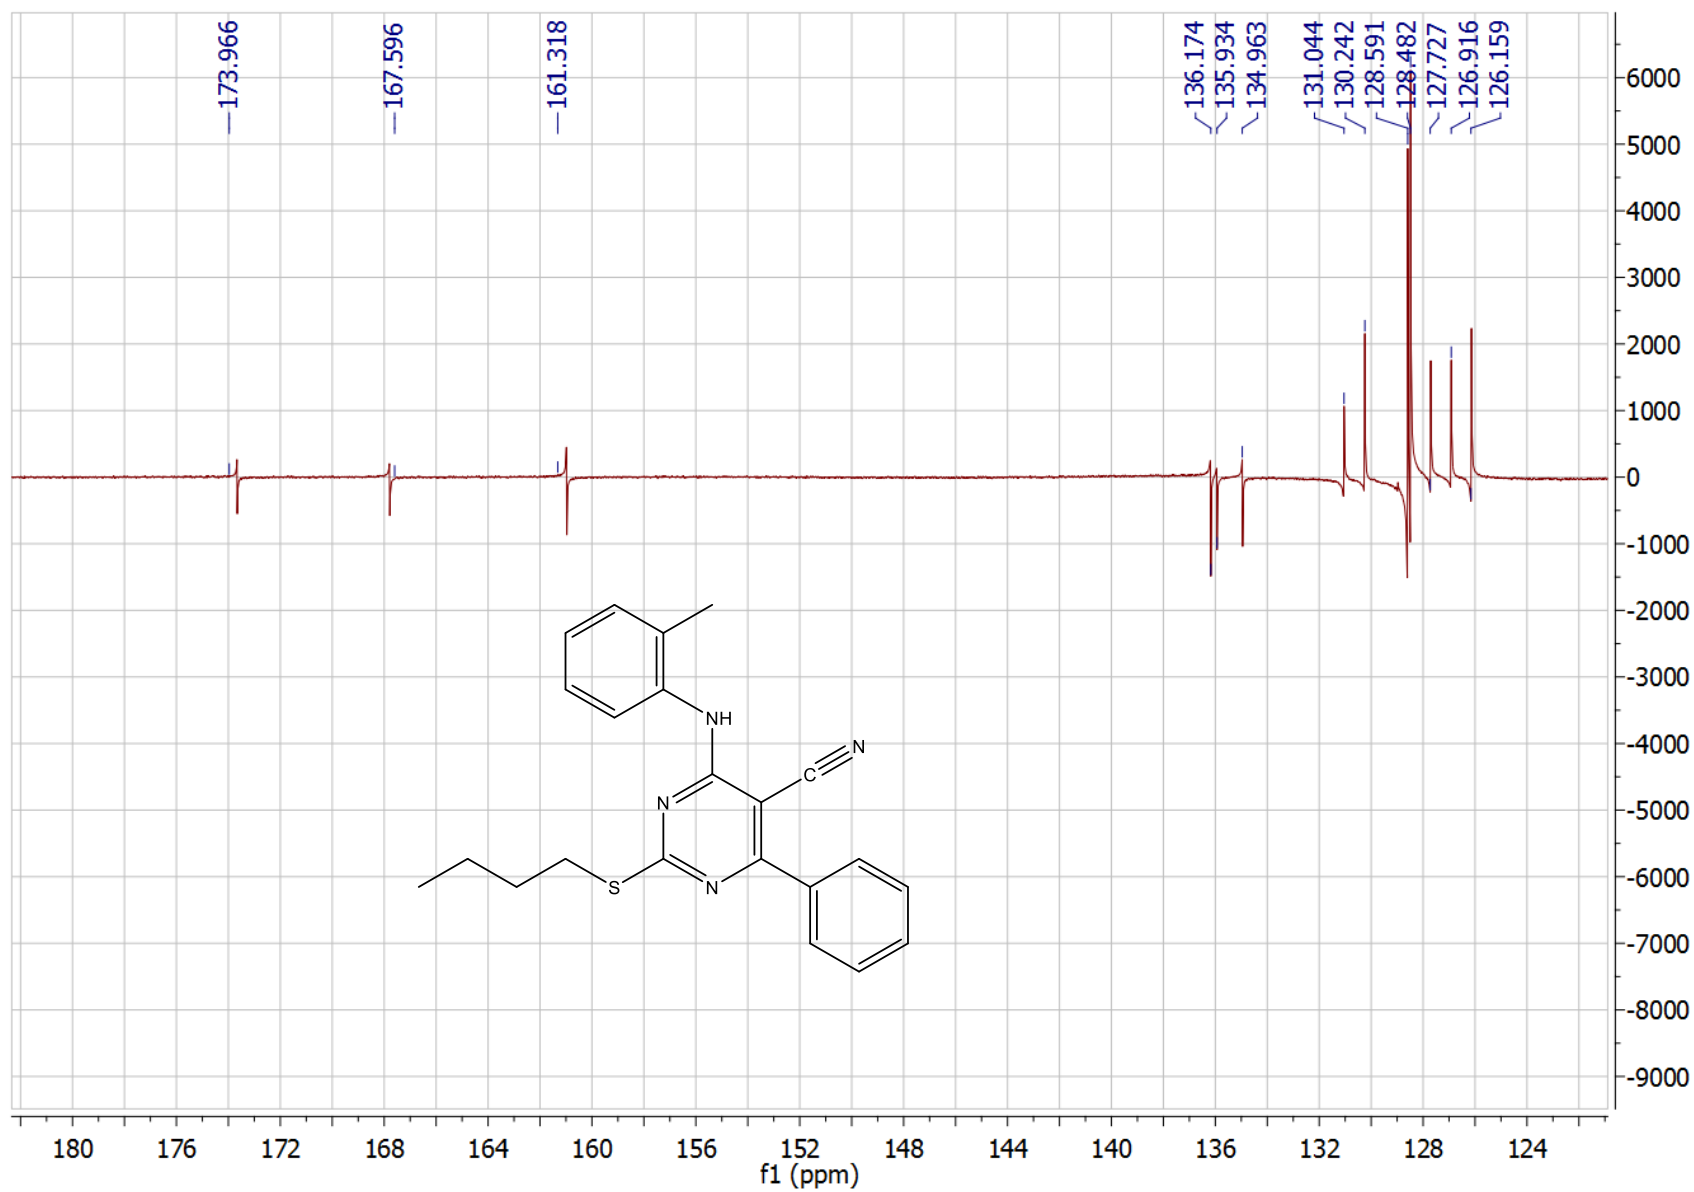

<sup>1</sup>H NMR of compound 10e

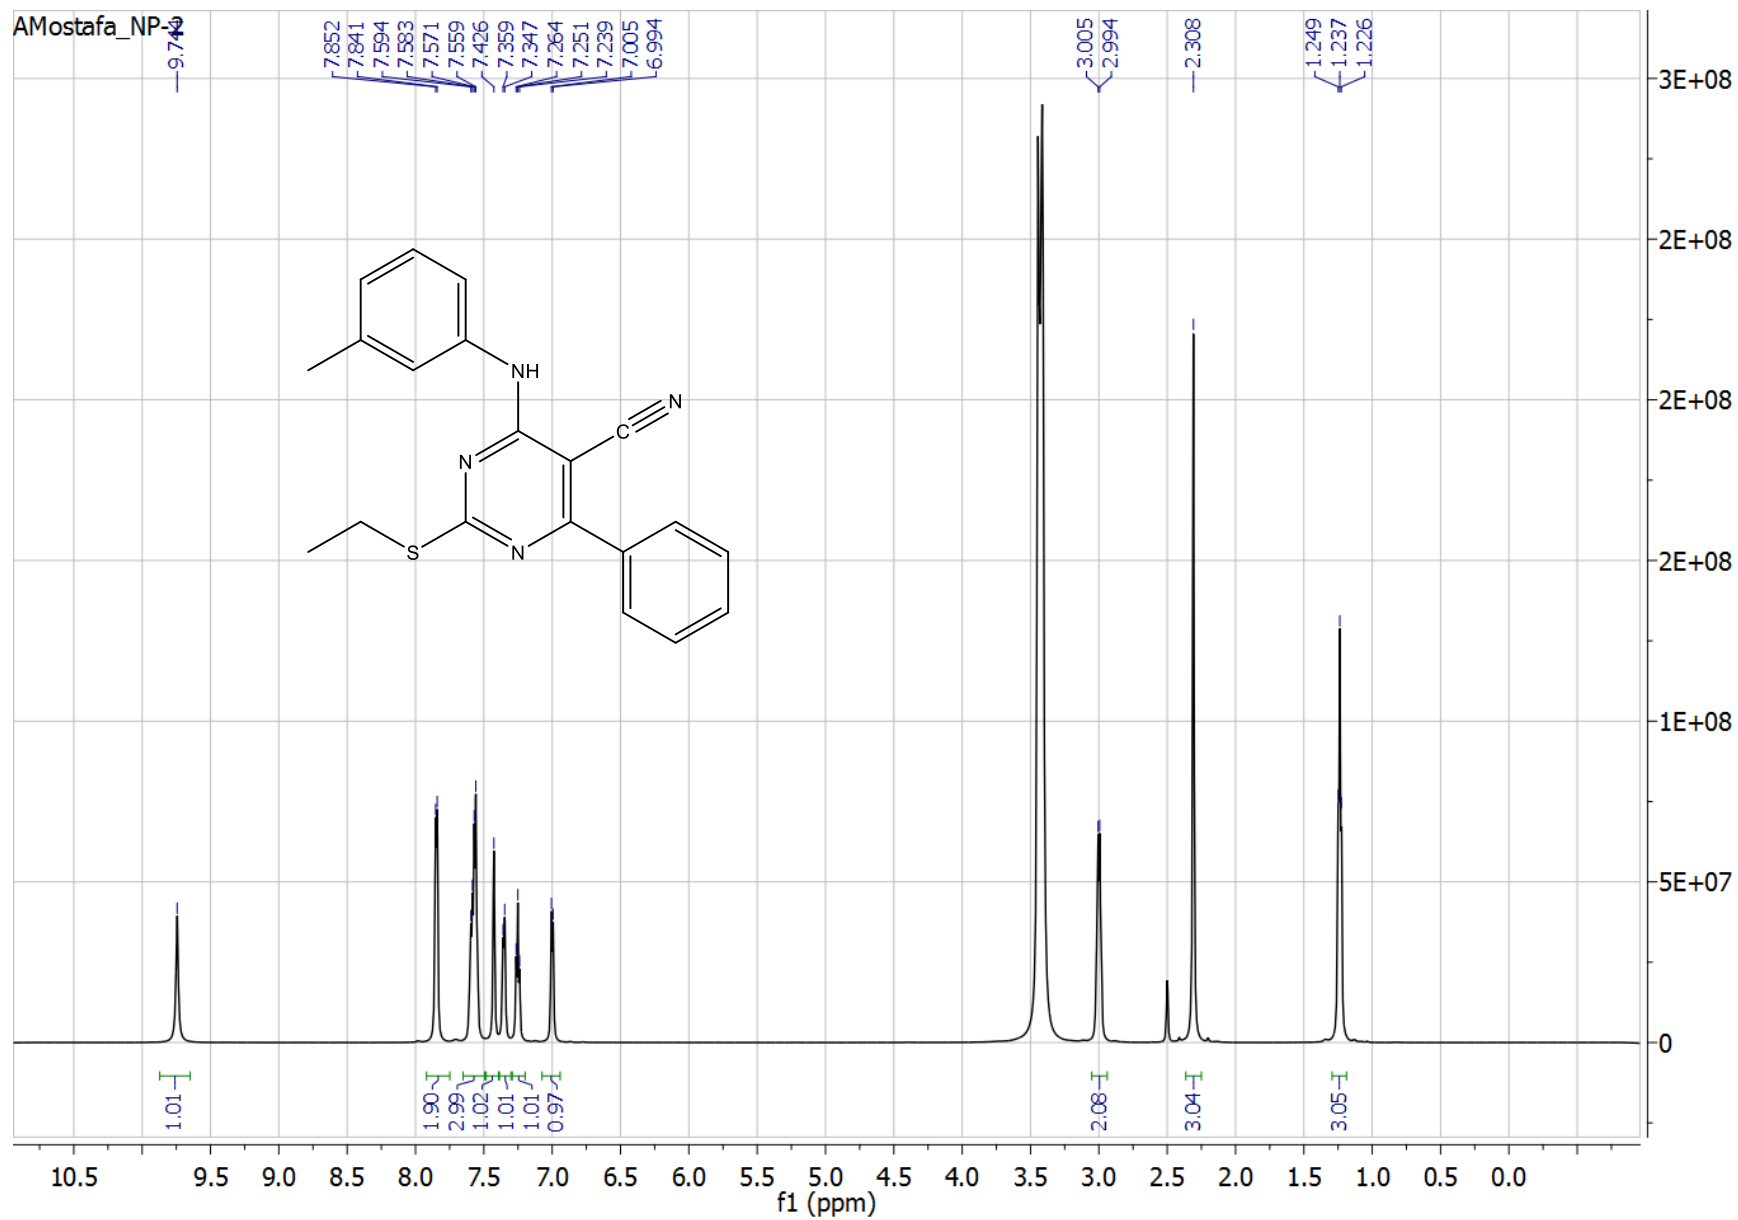

<sup>1</sup>H NMR of compound 10<sub>e</sub>

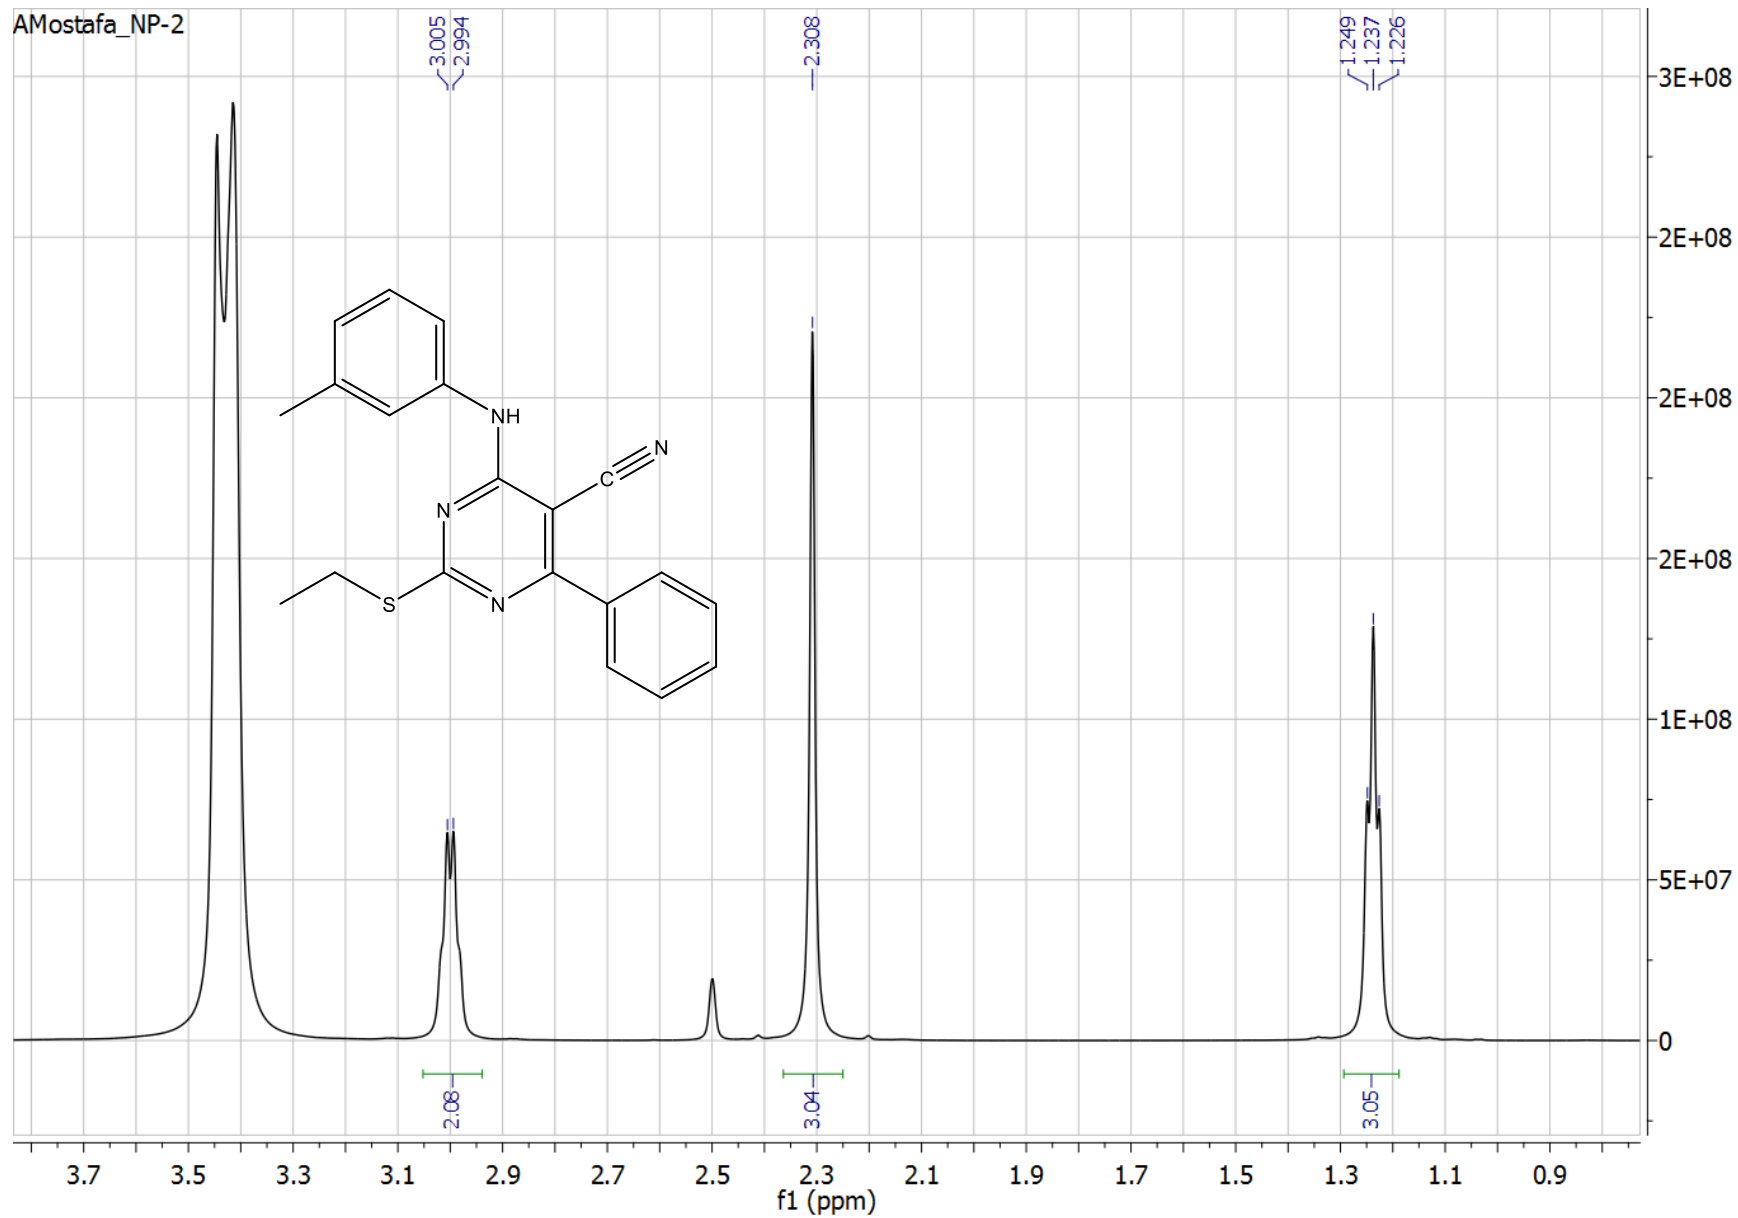

<sup>1</sup>H NMR of compound 10<sub>e</sub>

AMostafa\_NP-2

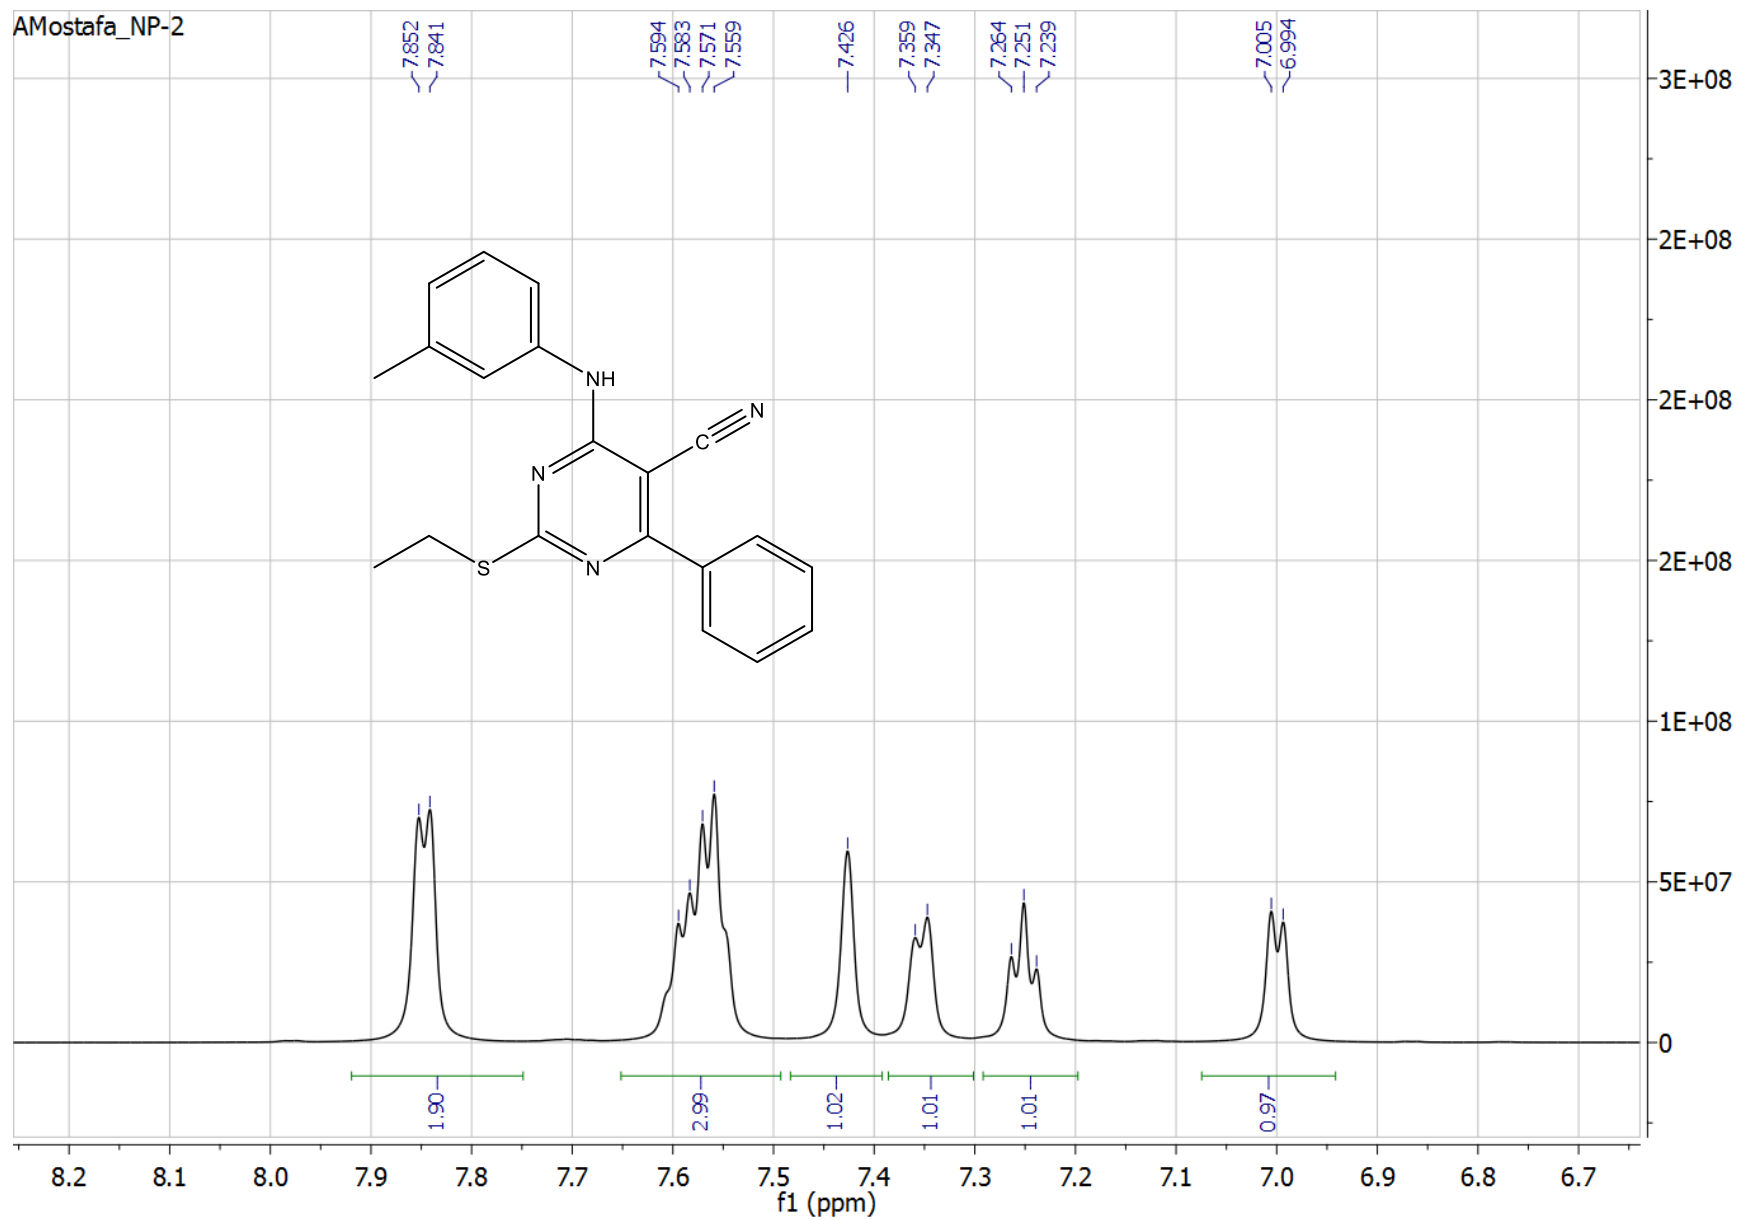

<sup>13</sup>C NMR of compound 10<sub>e</sub>

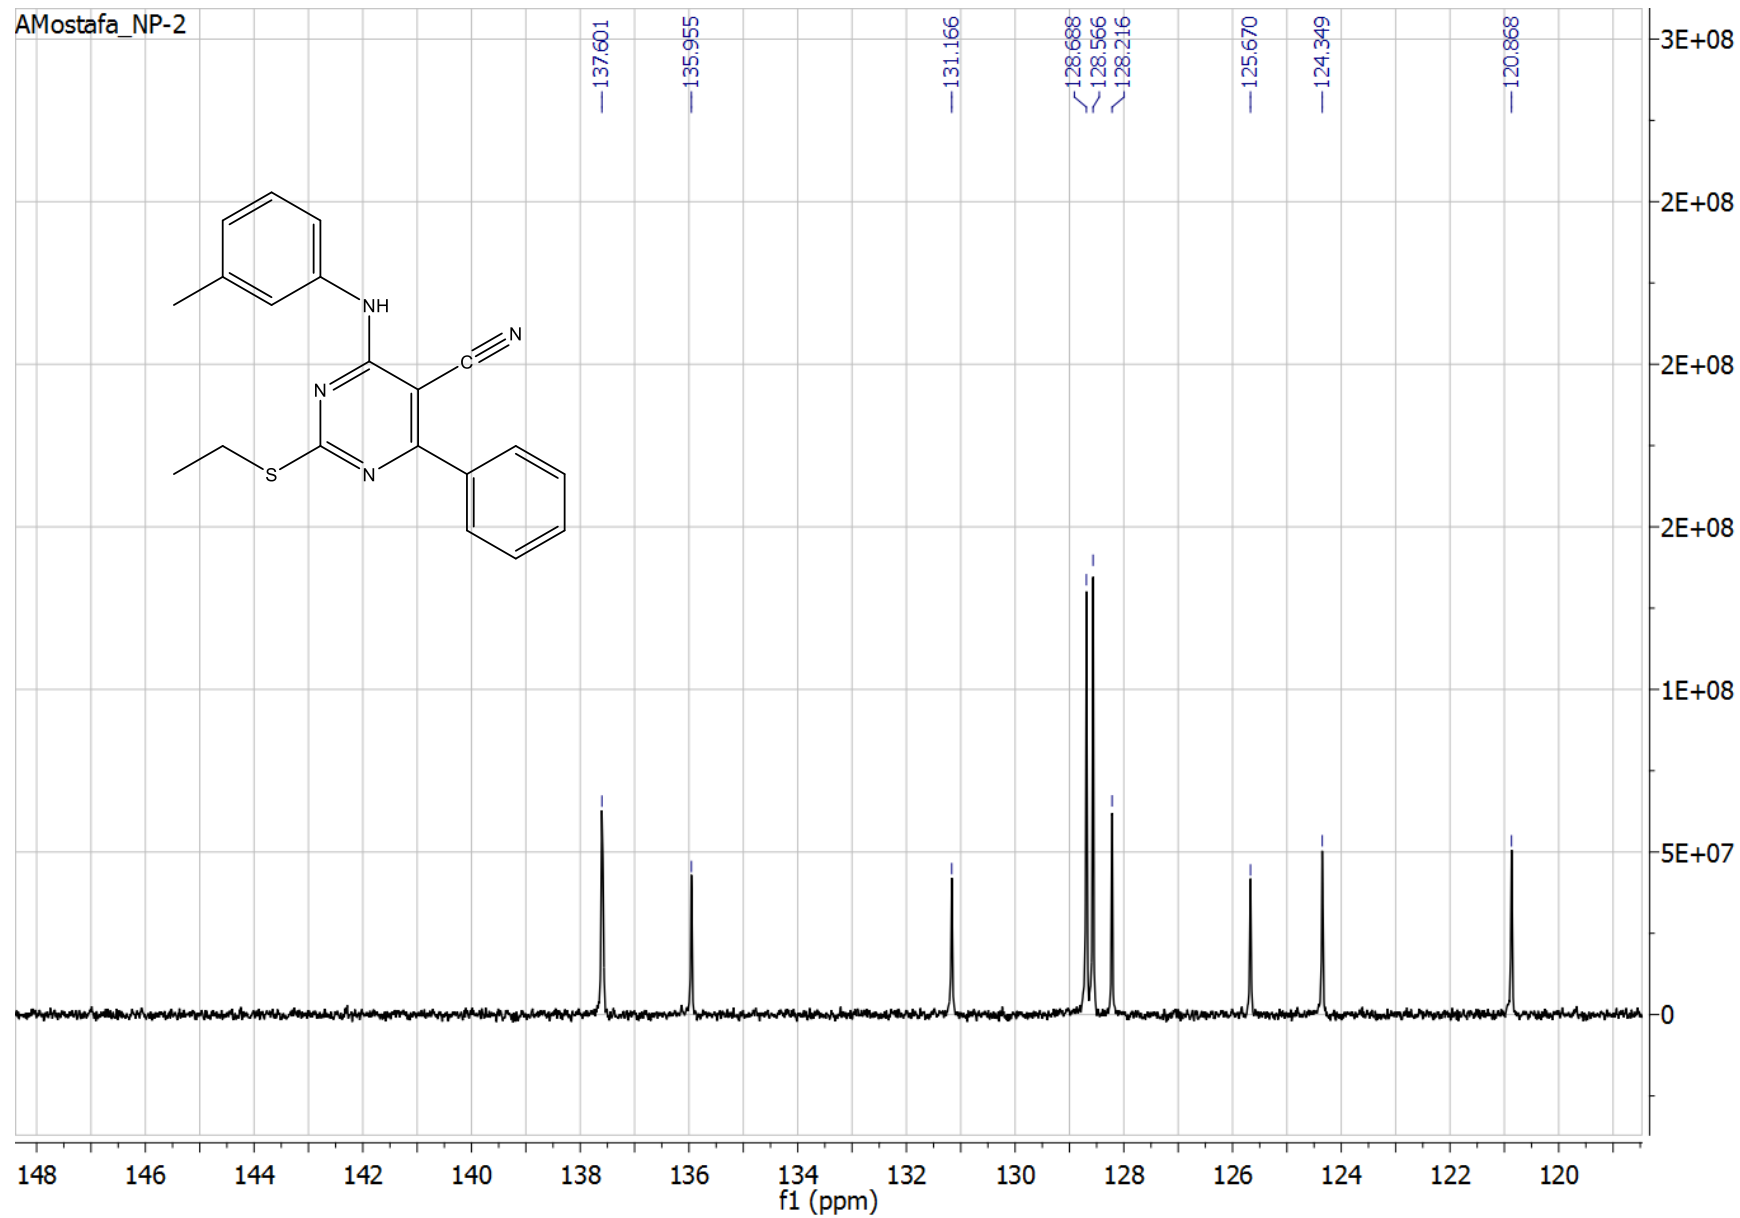



<sup>13</sup>C NMR of compound 10<sub>e</sub>

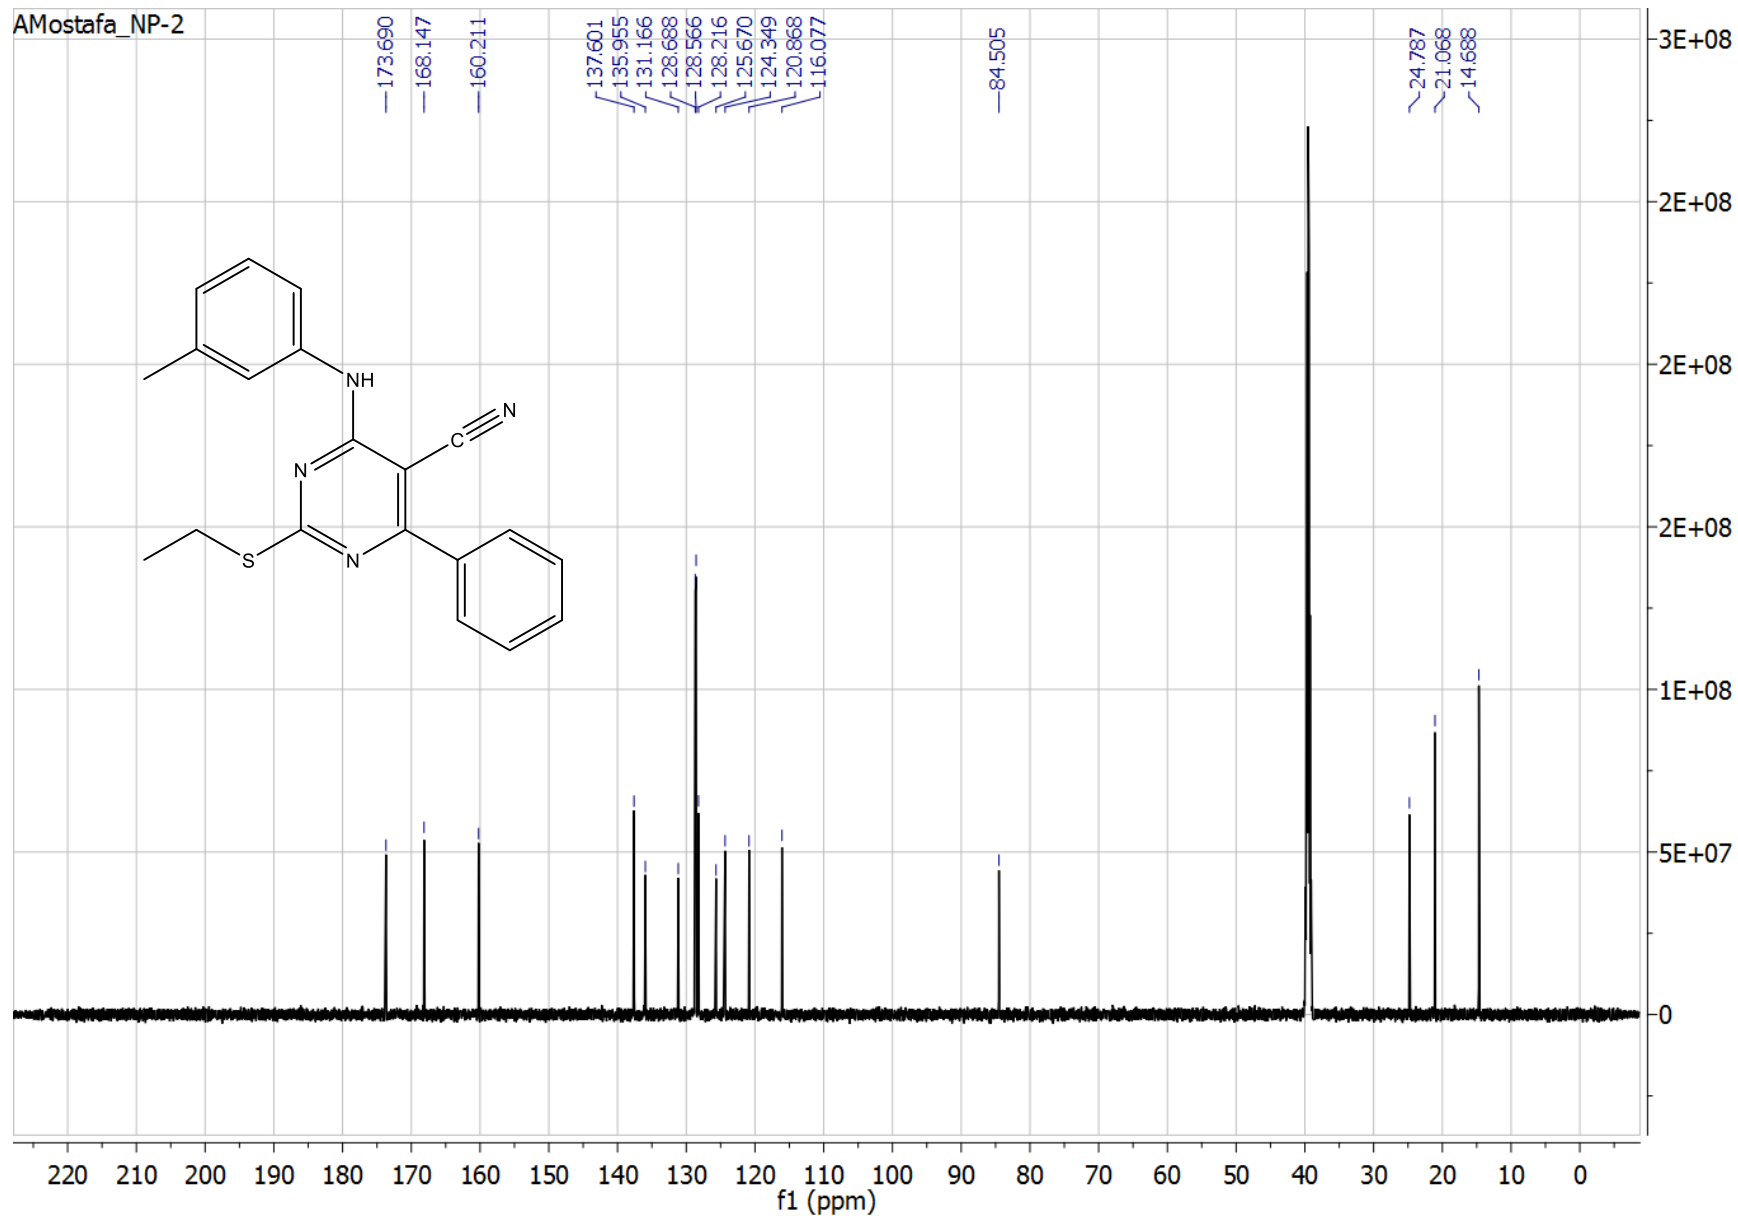

# APT of compound 10<sub>e</sub>

AMostafa\_NP-2

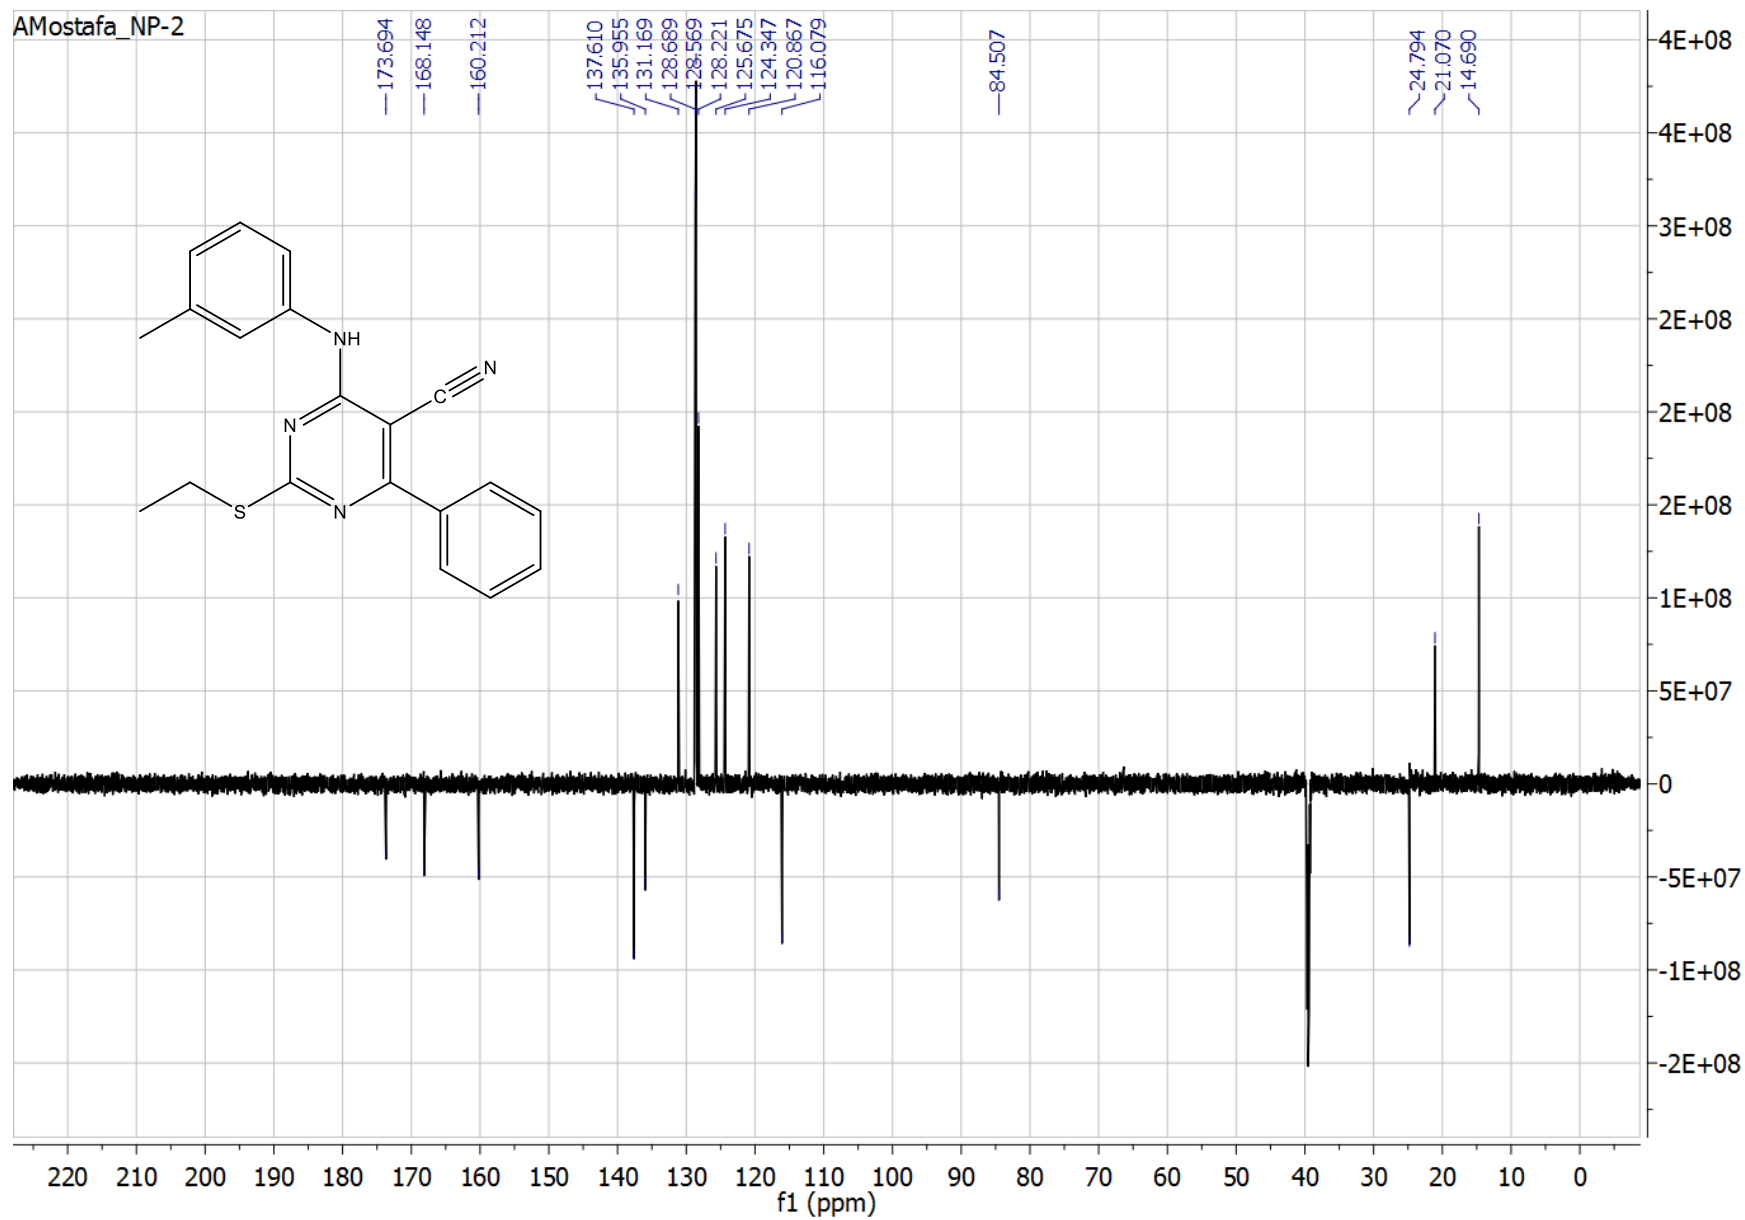

# APT of compound 10<sub>e</sub>

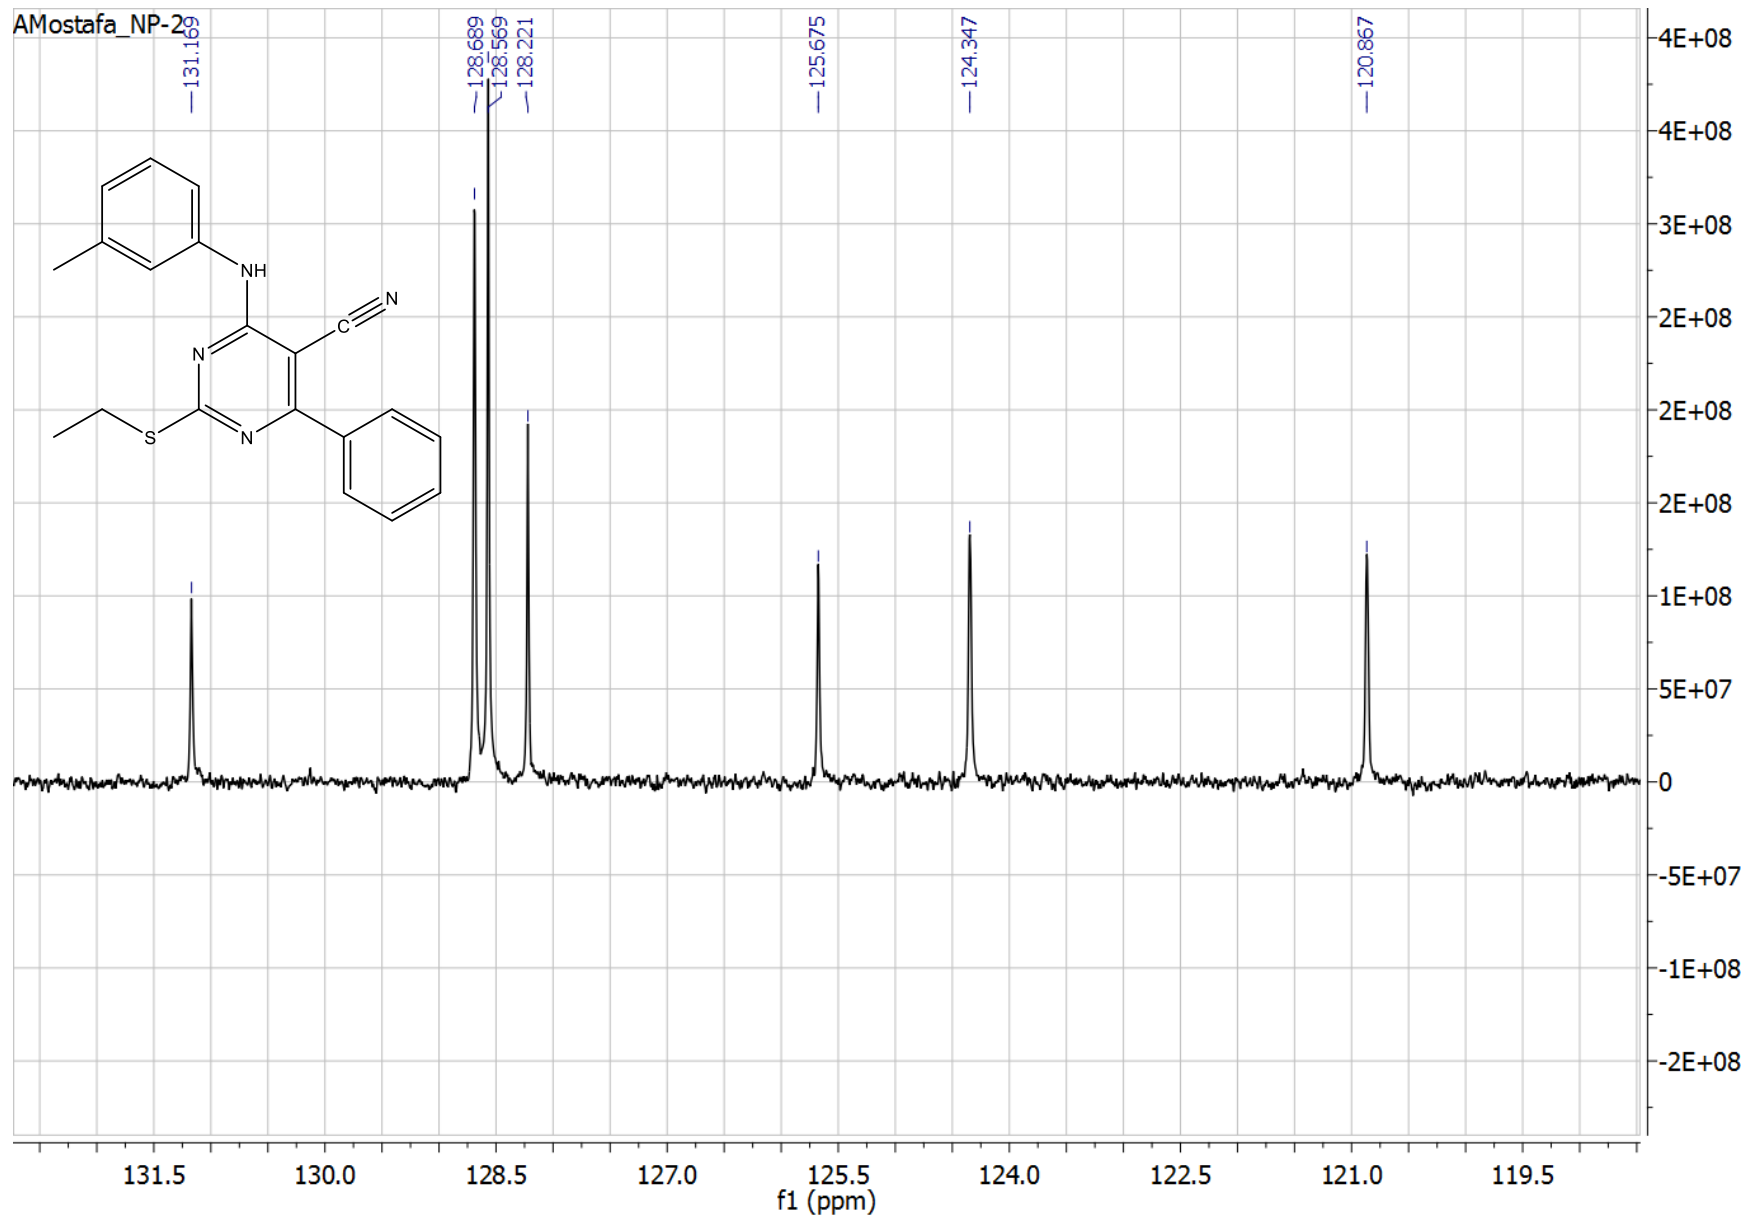

<sup>1</sup>H NMR of compound 10f

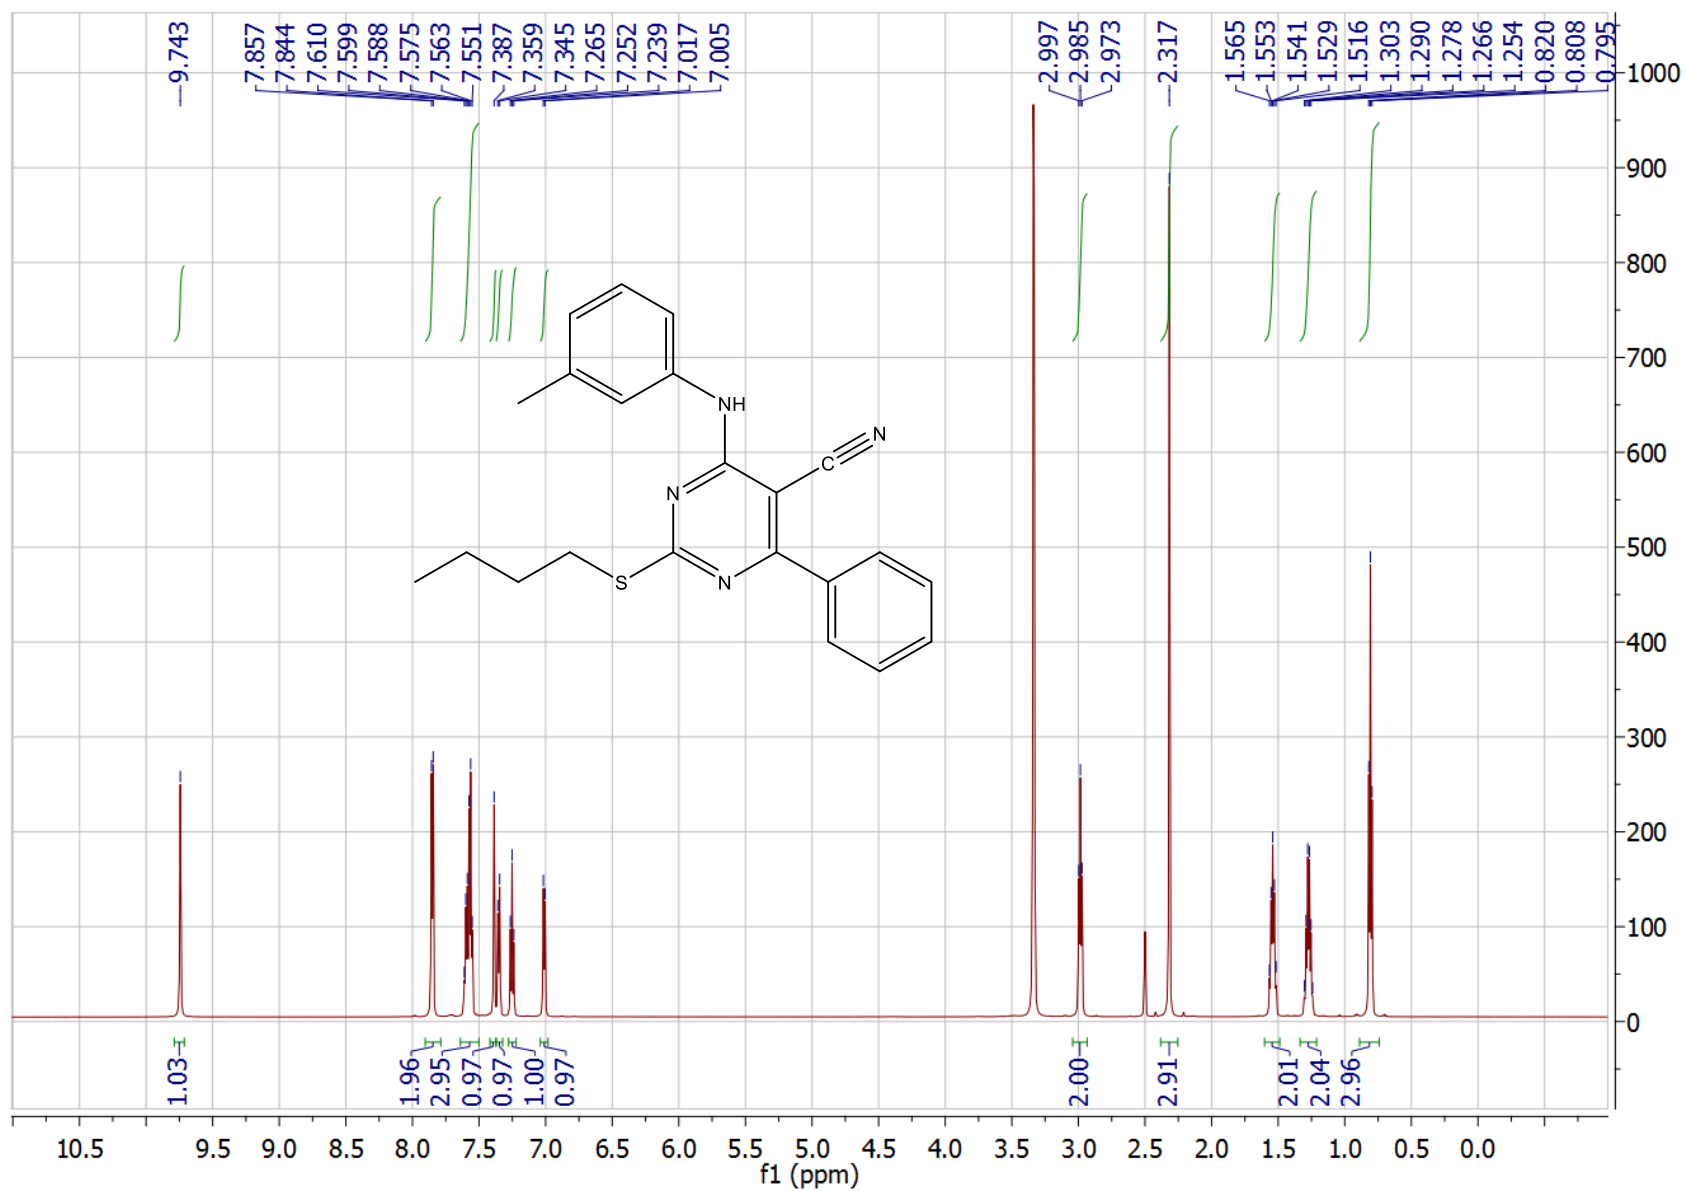

<sup>1</sup>H NMR of compound 10f

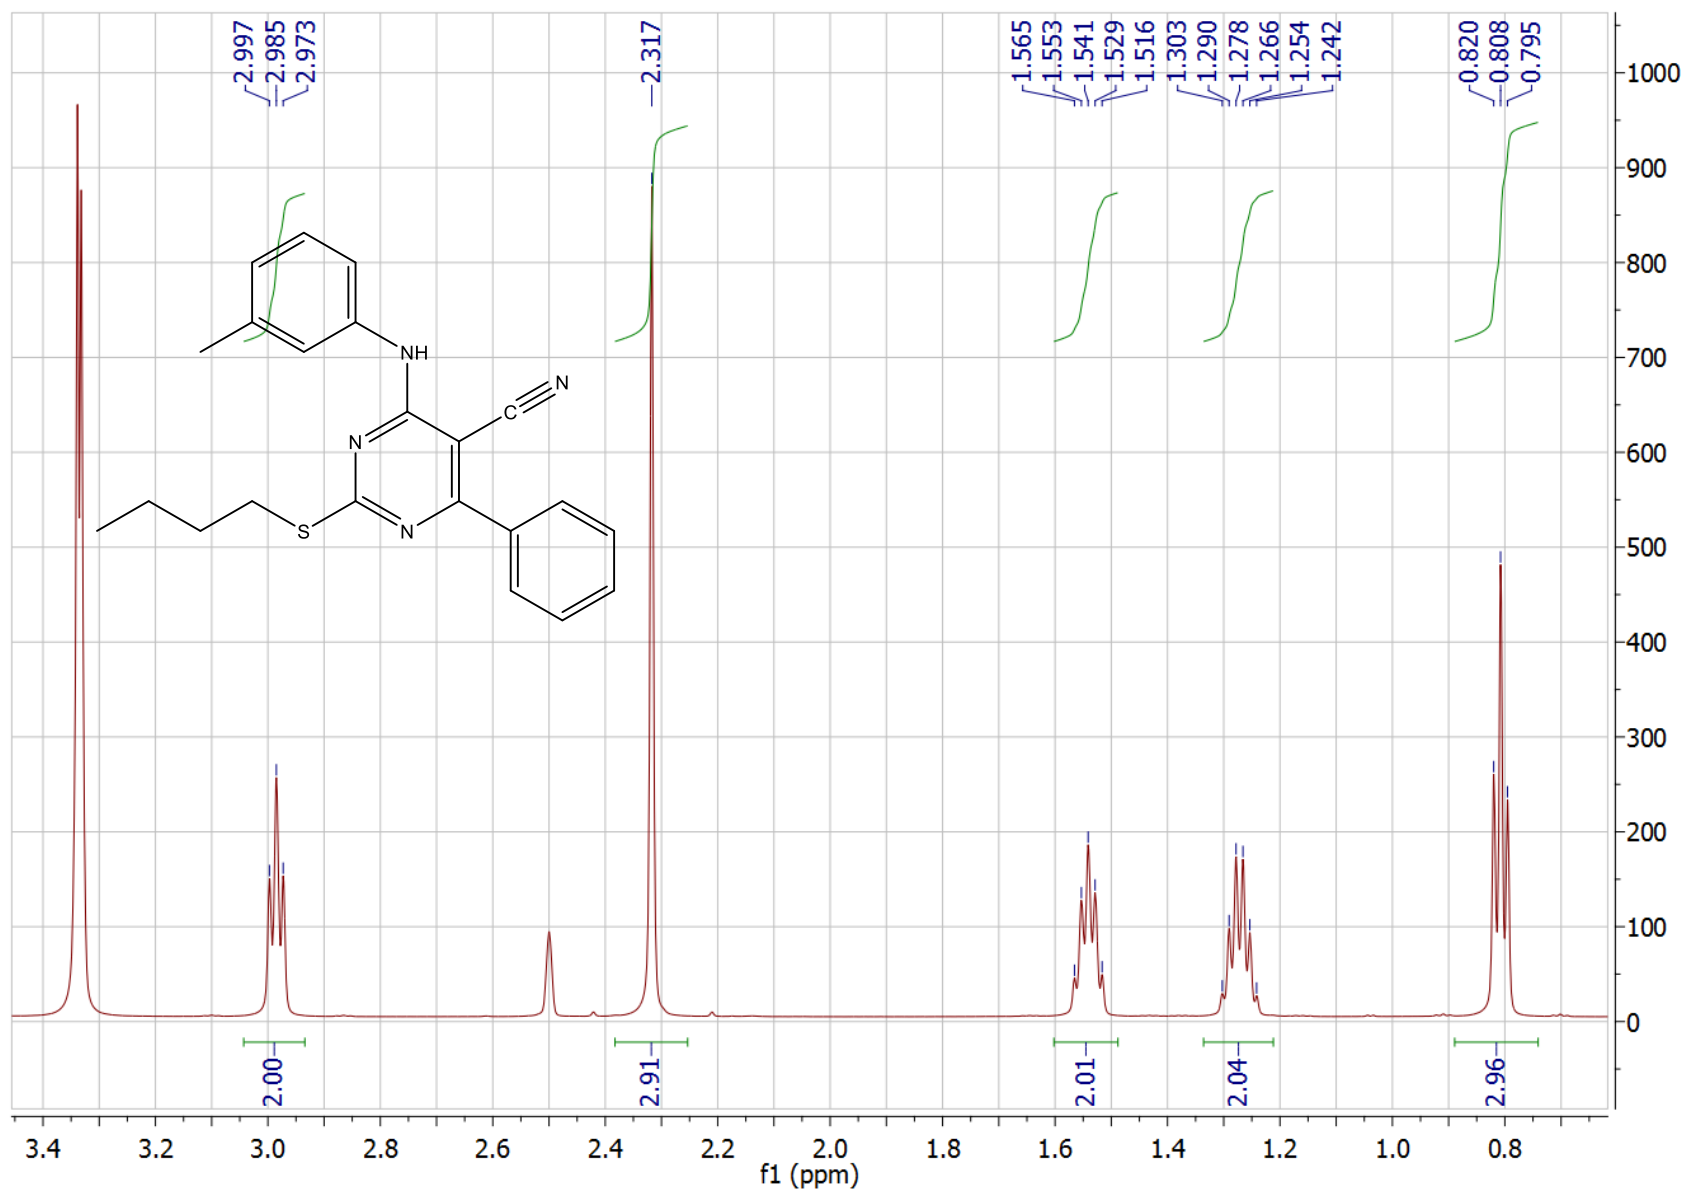

<sup>1</sup>H NMR of compound 10f

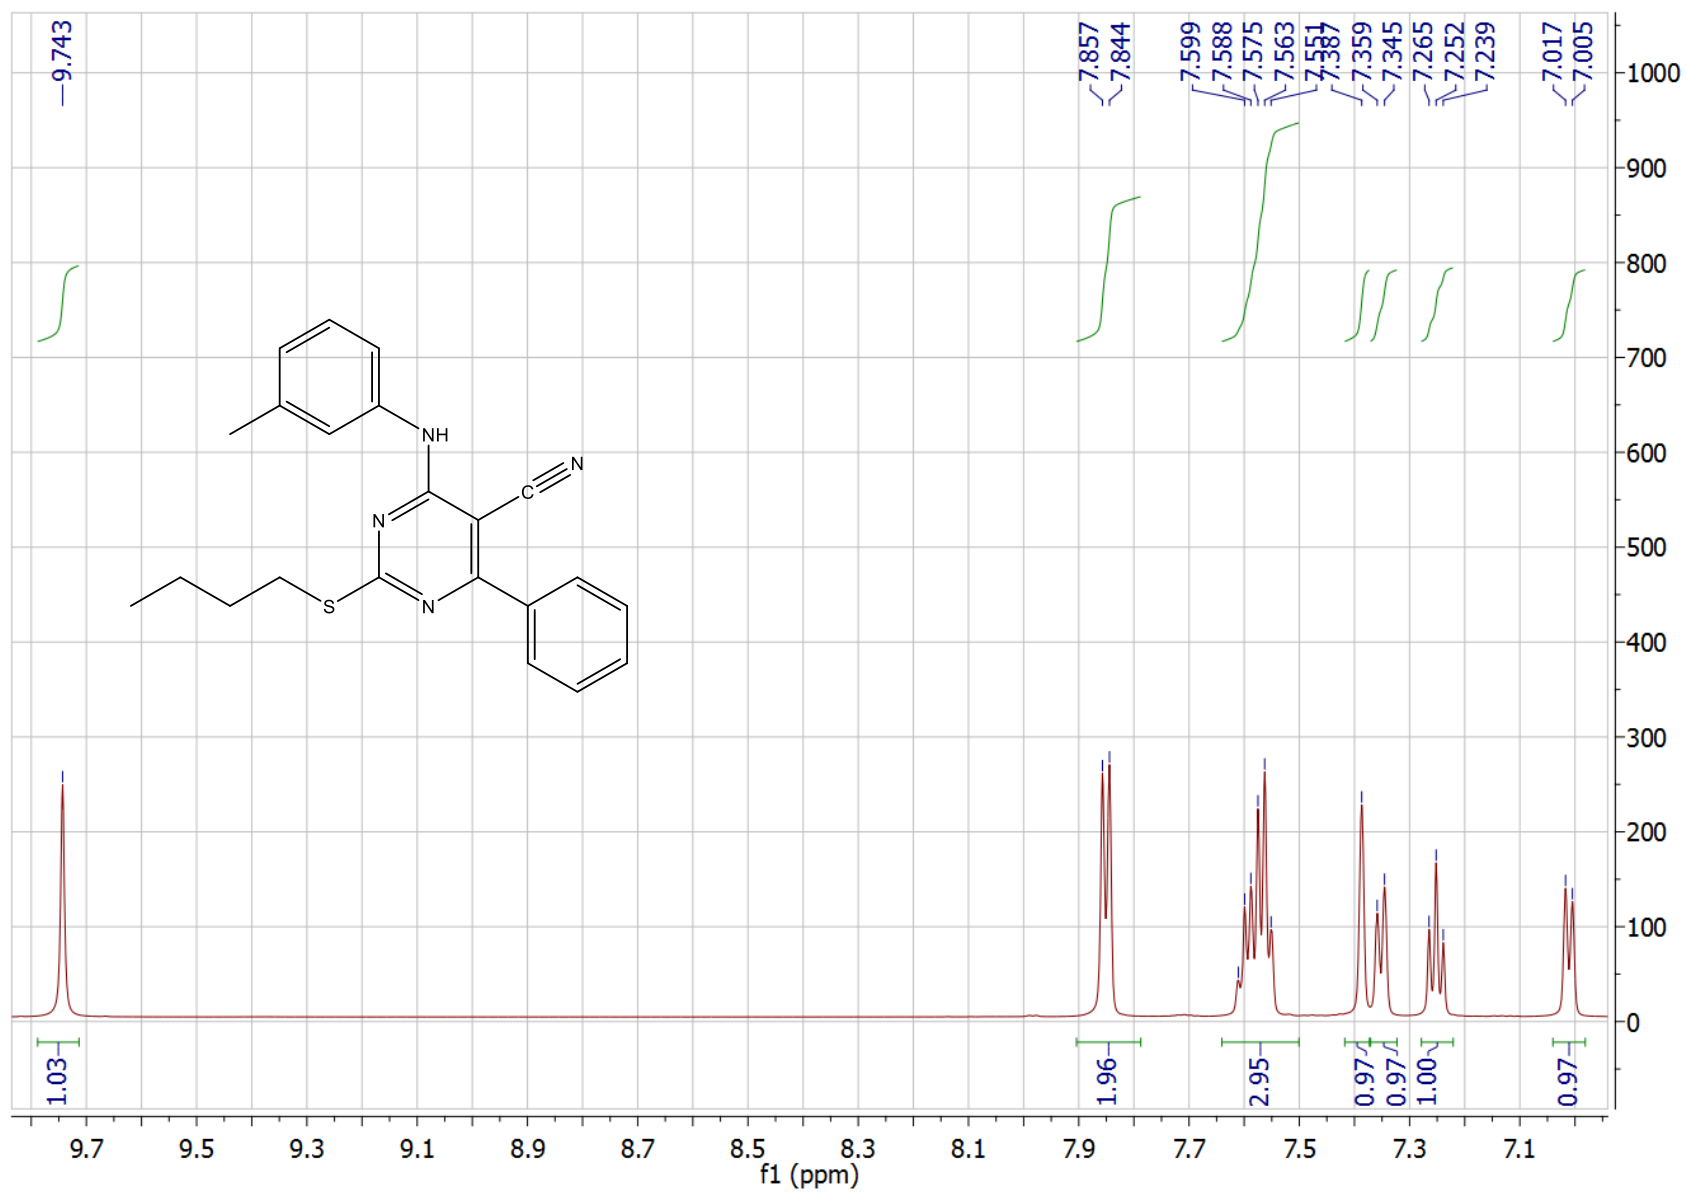

<sup>13</sup>C NMR of compound 10<sub>f</sub>

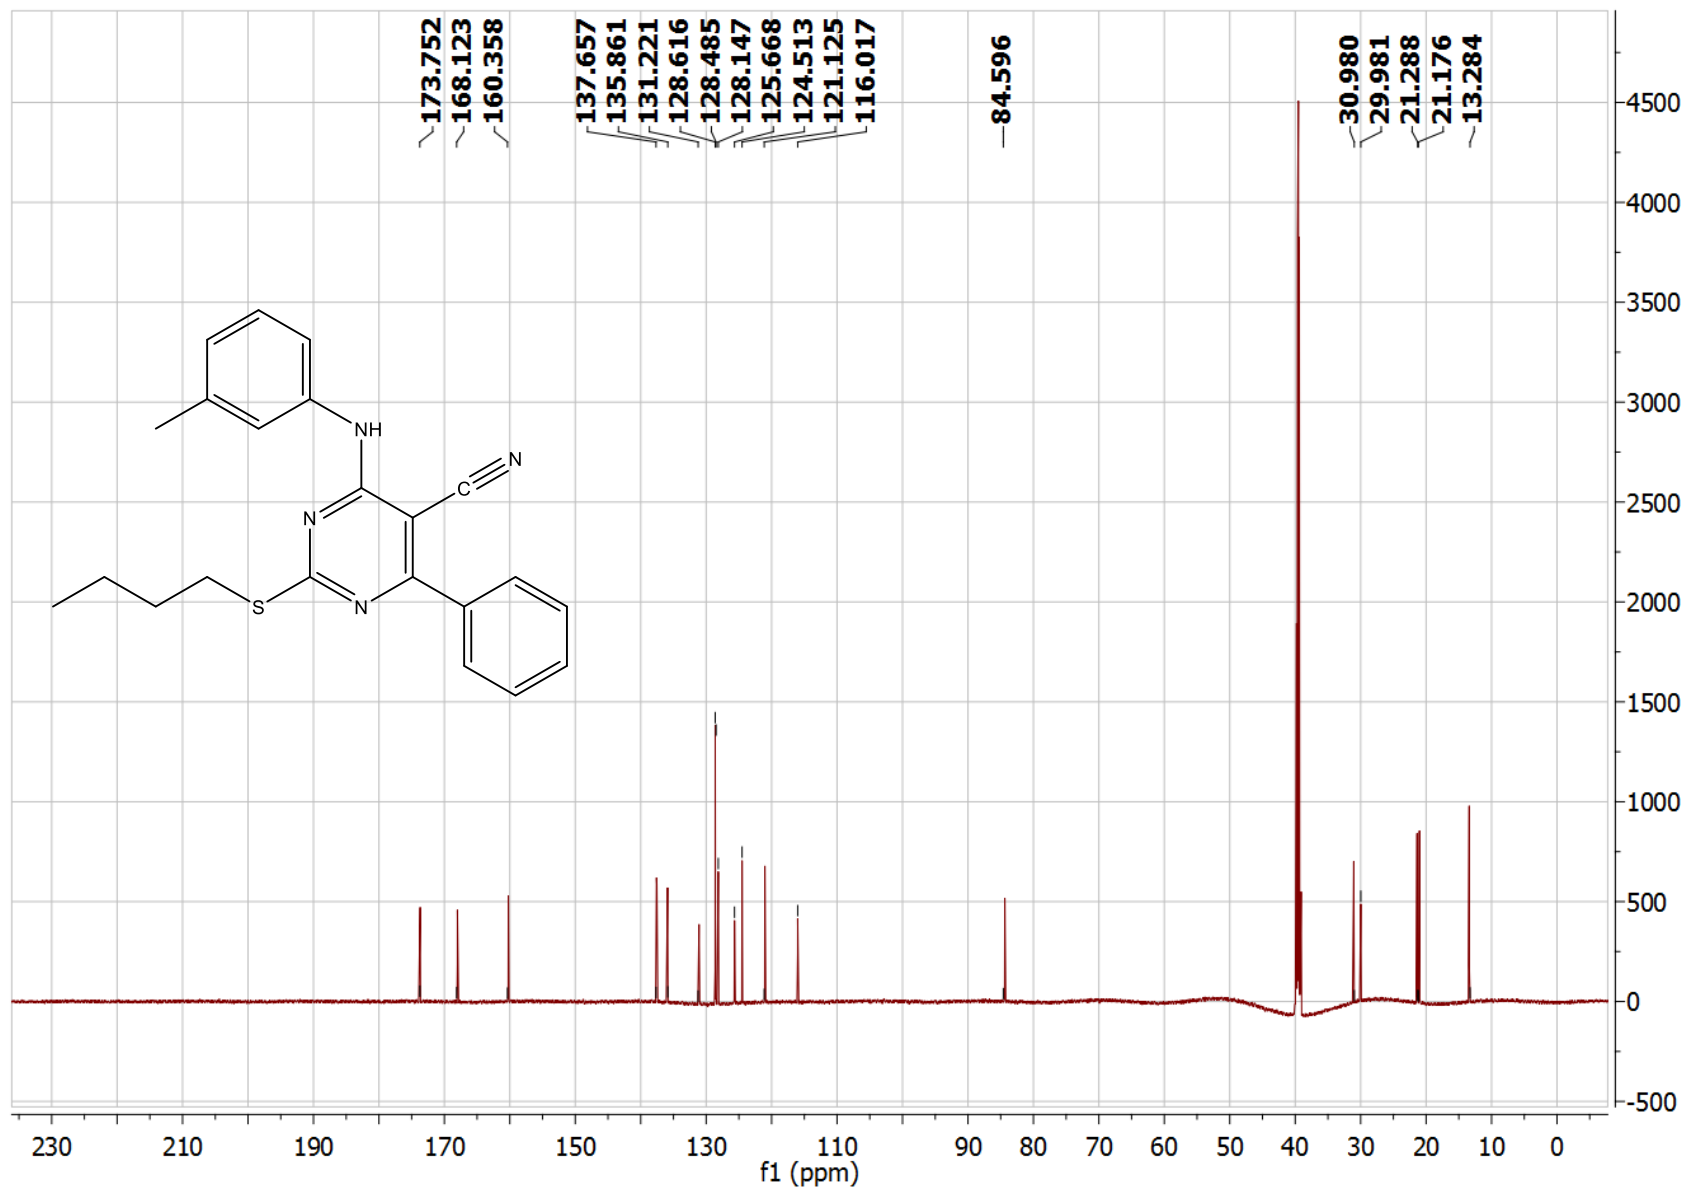

<sup>13</sup>C NMR of compound 10<sub>f</sub>

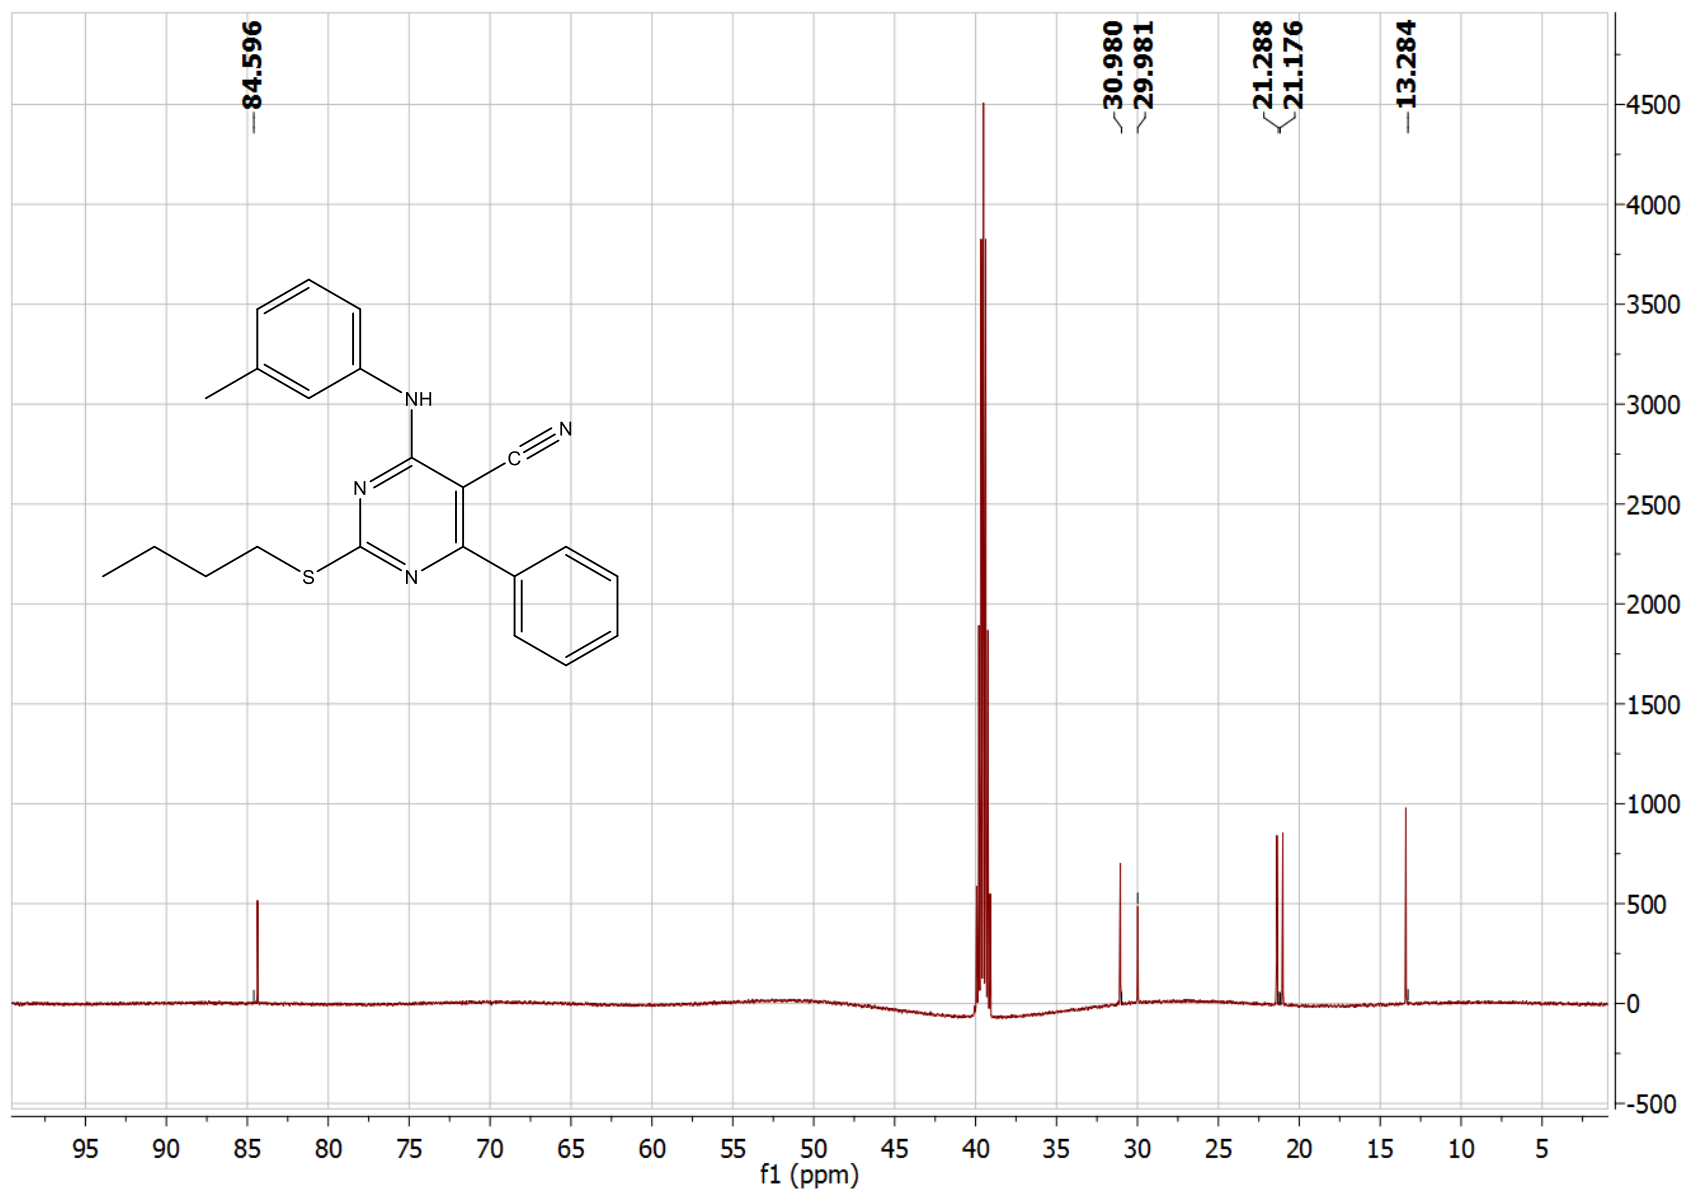



<sup>13</sup>C NMR of compound 10<sub>f</sub>

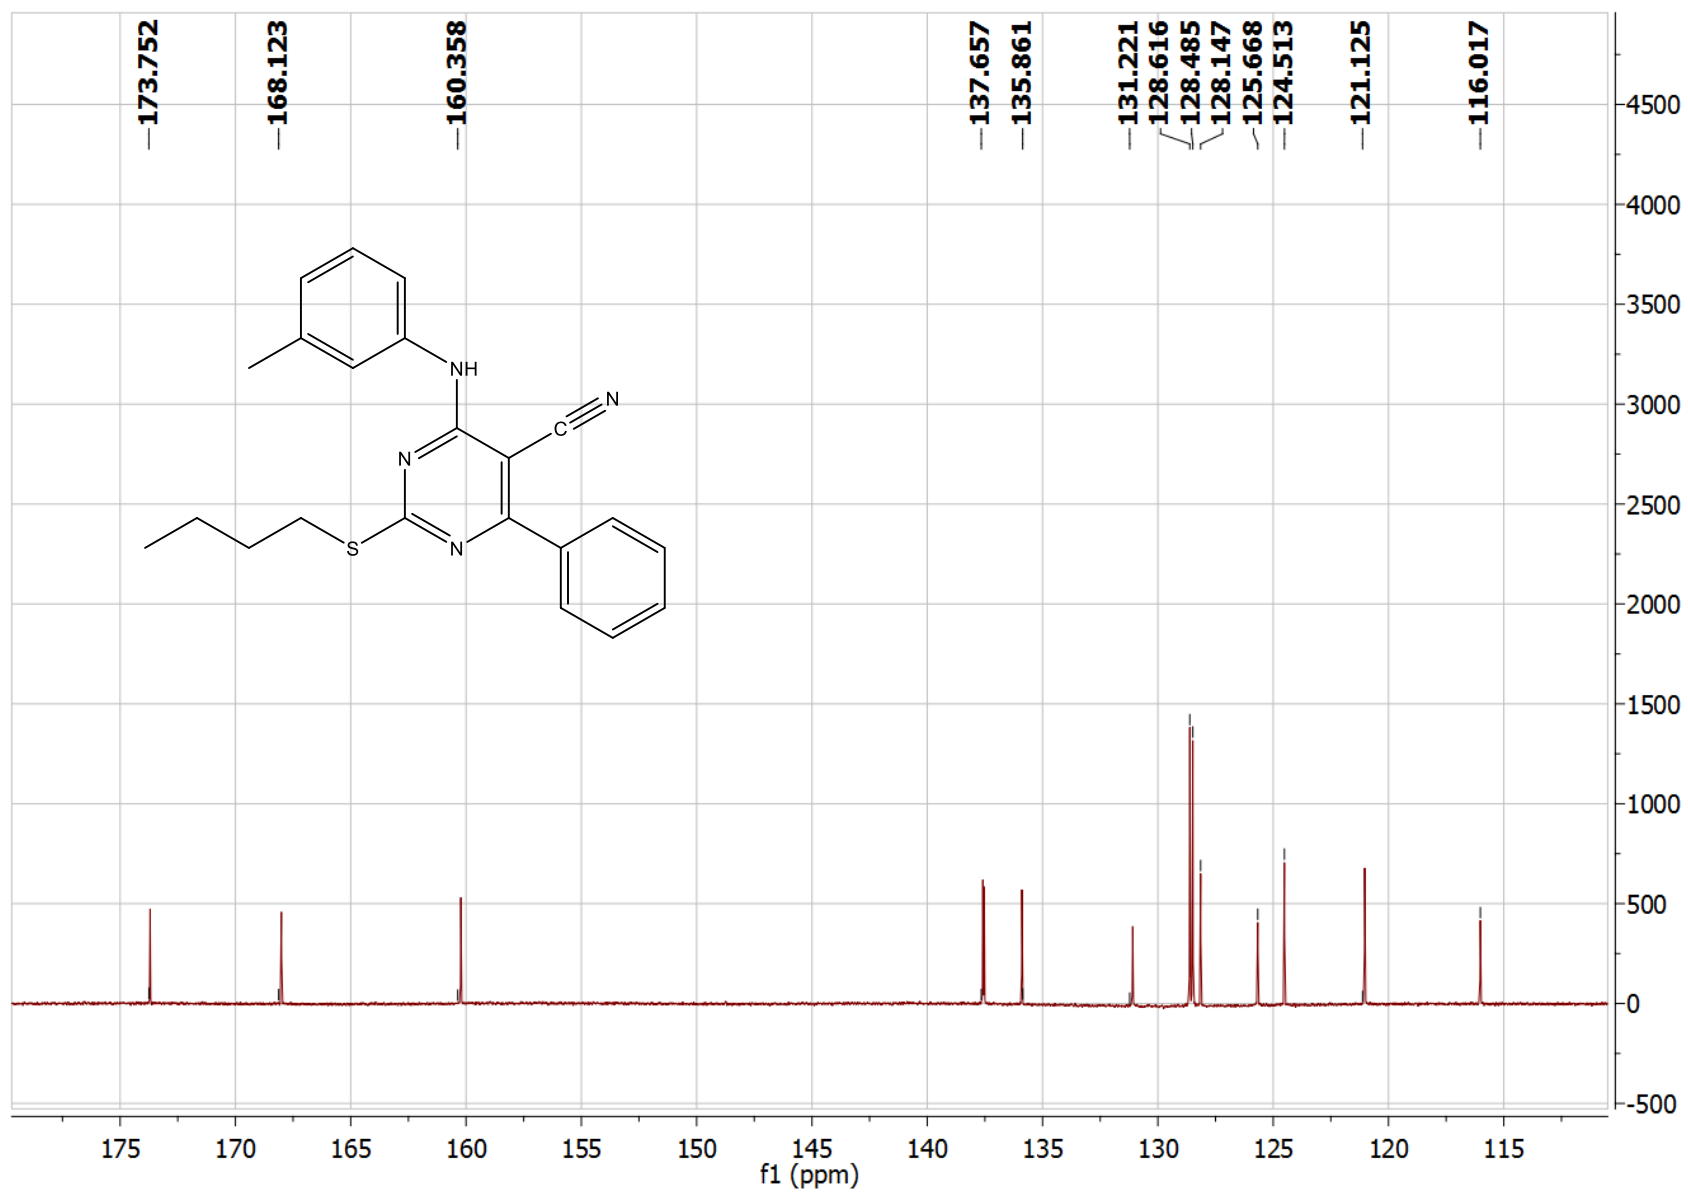

APT of compound 10f

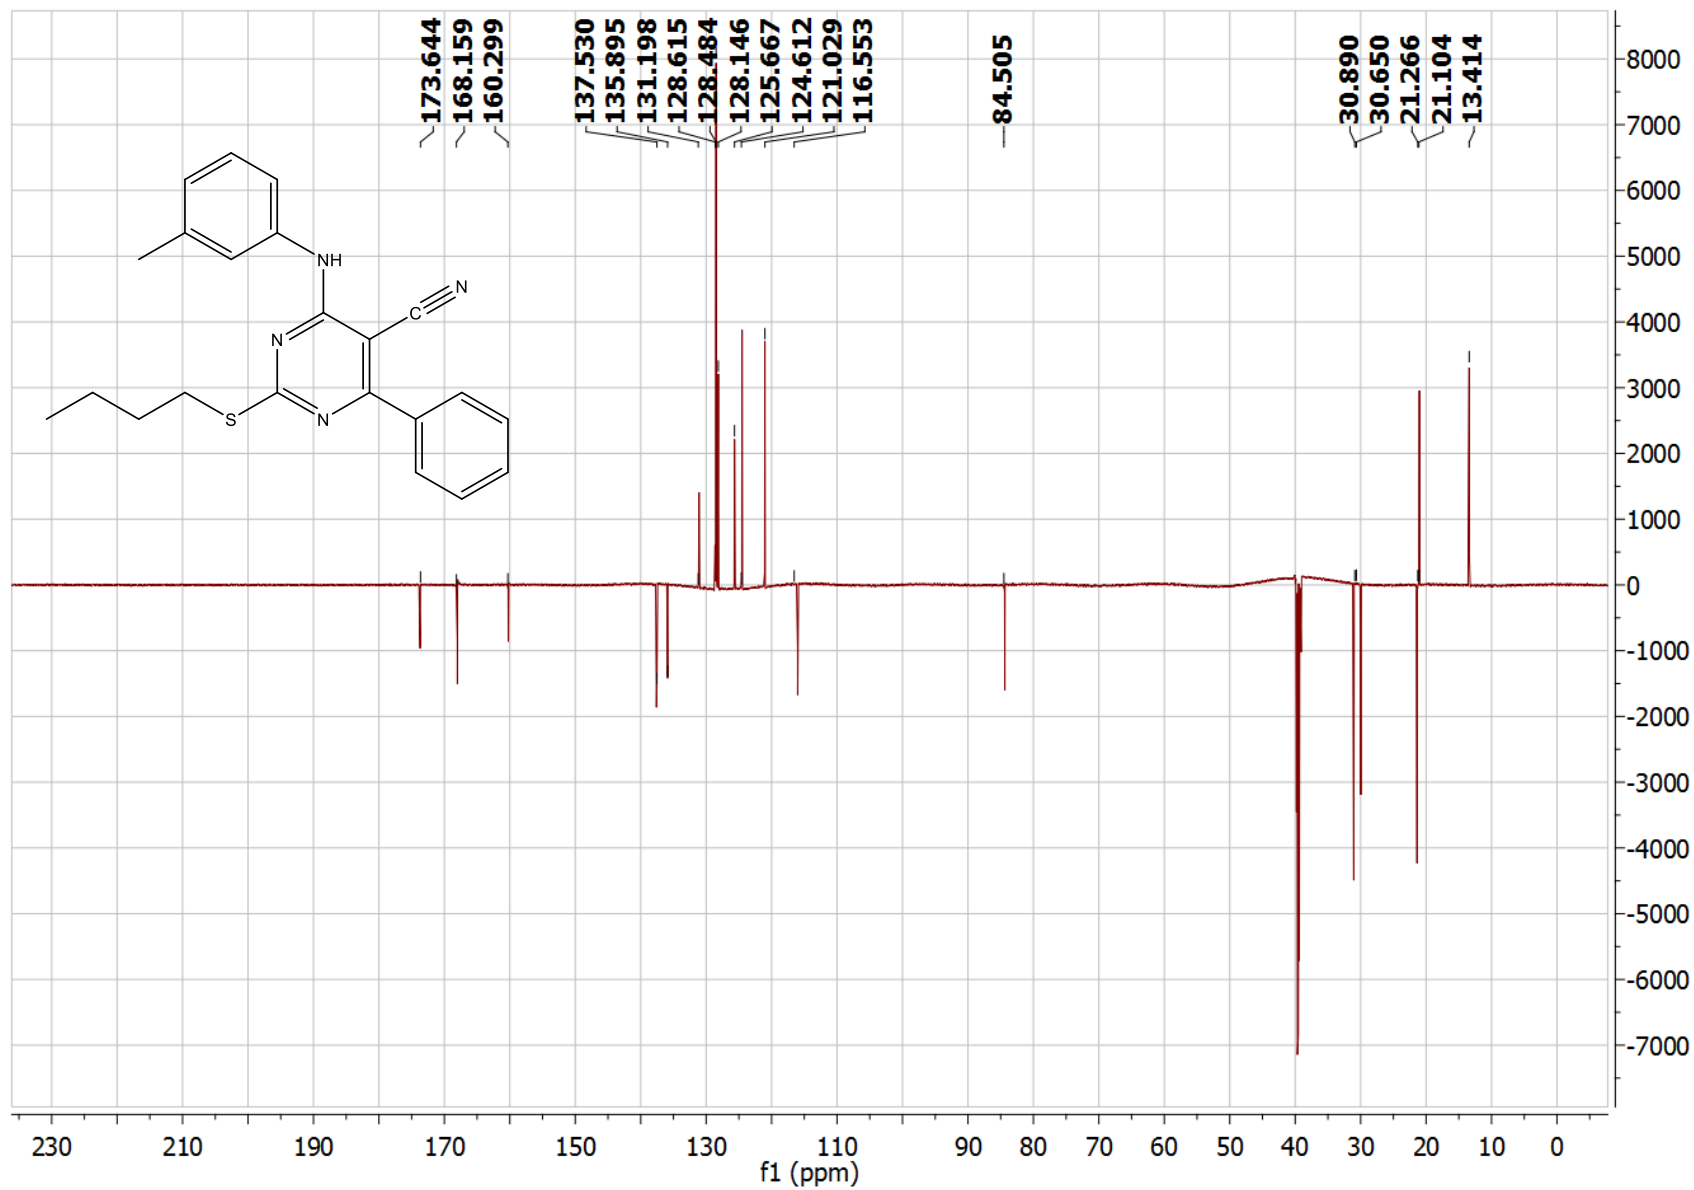

APT of compound 10<sub>f</sub>

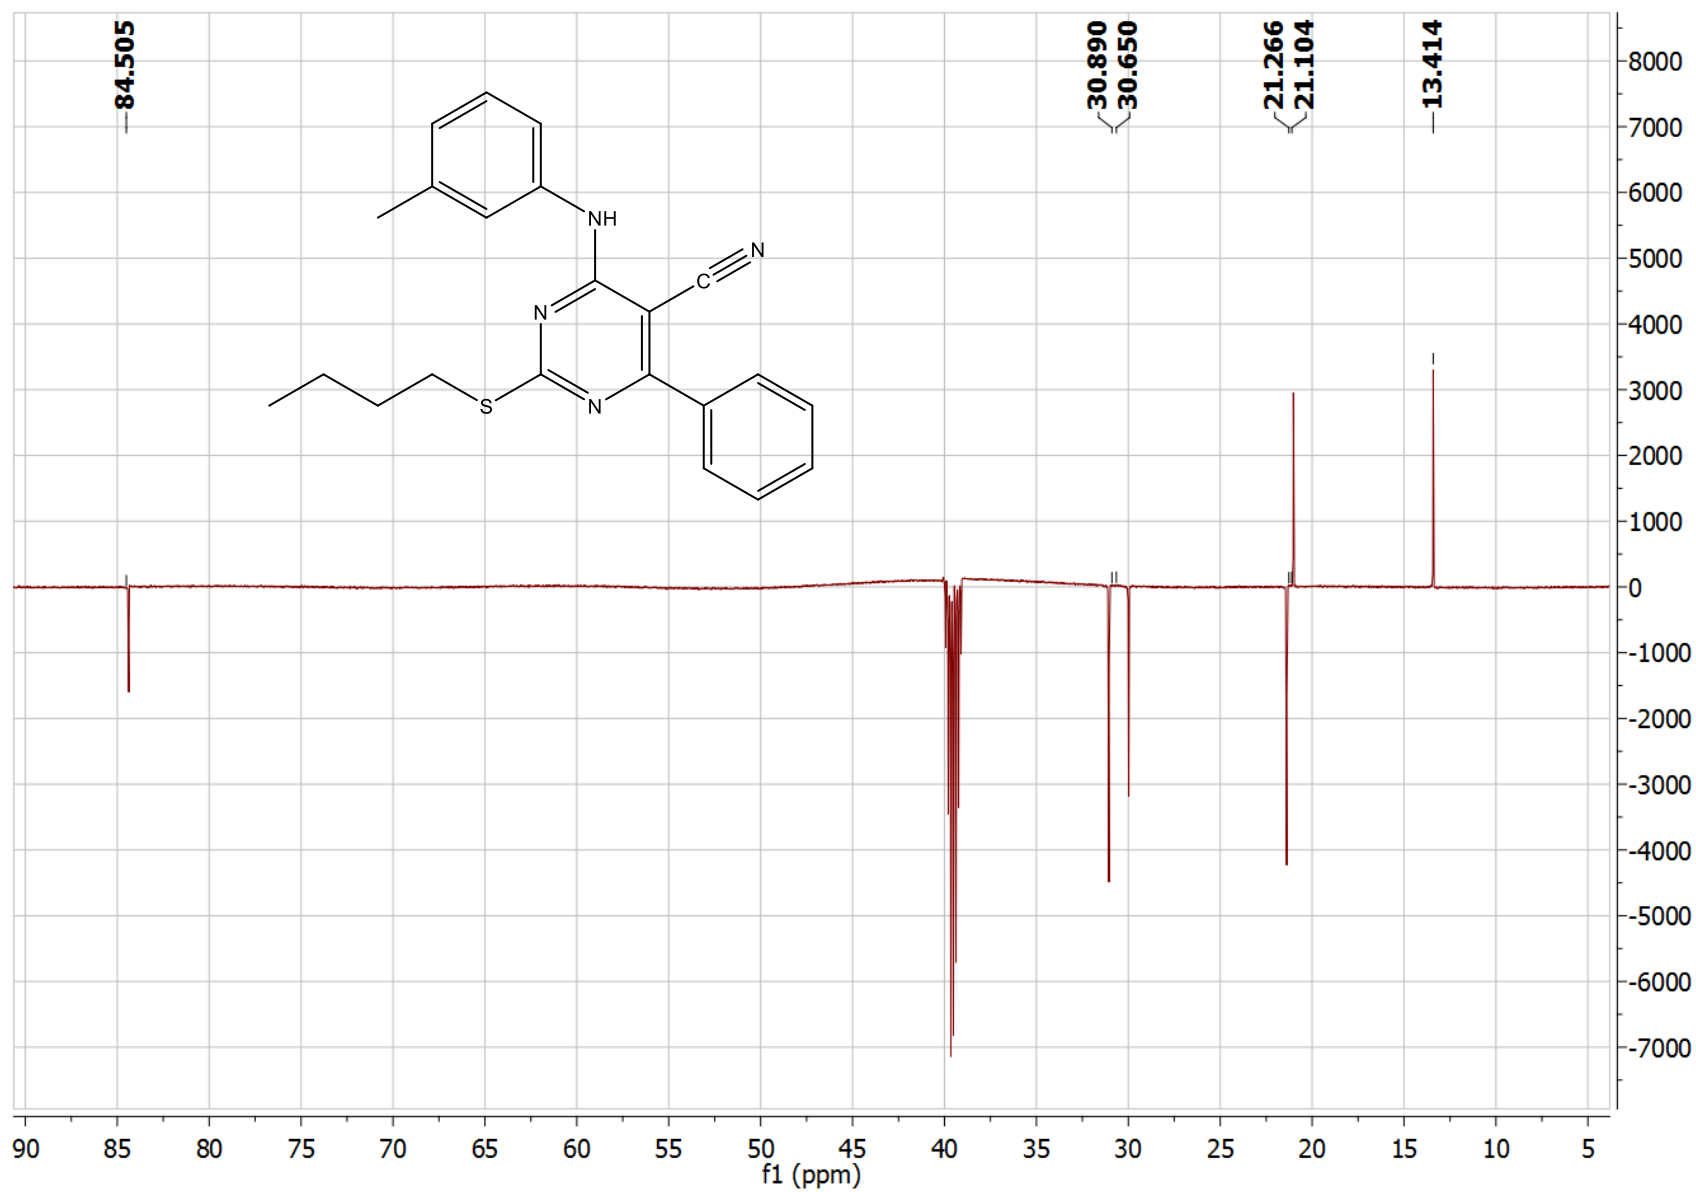

APT of compound 10<sub>f</sub>

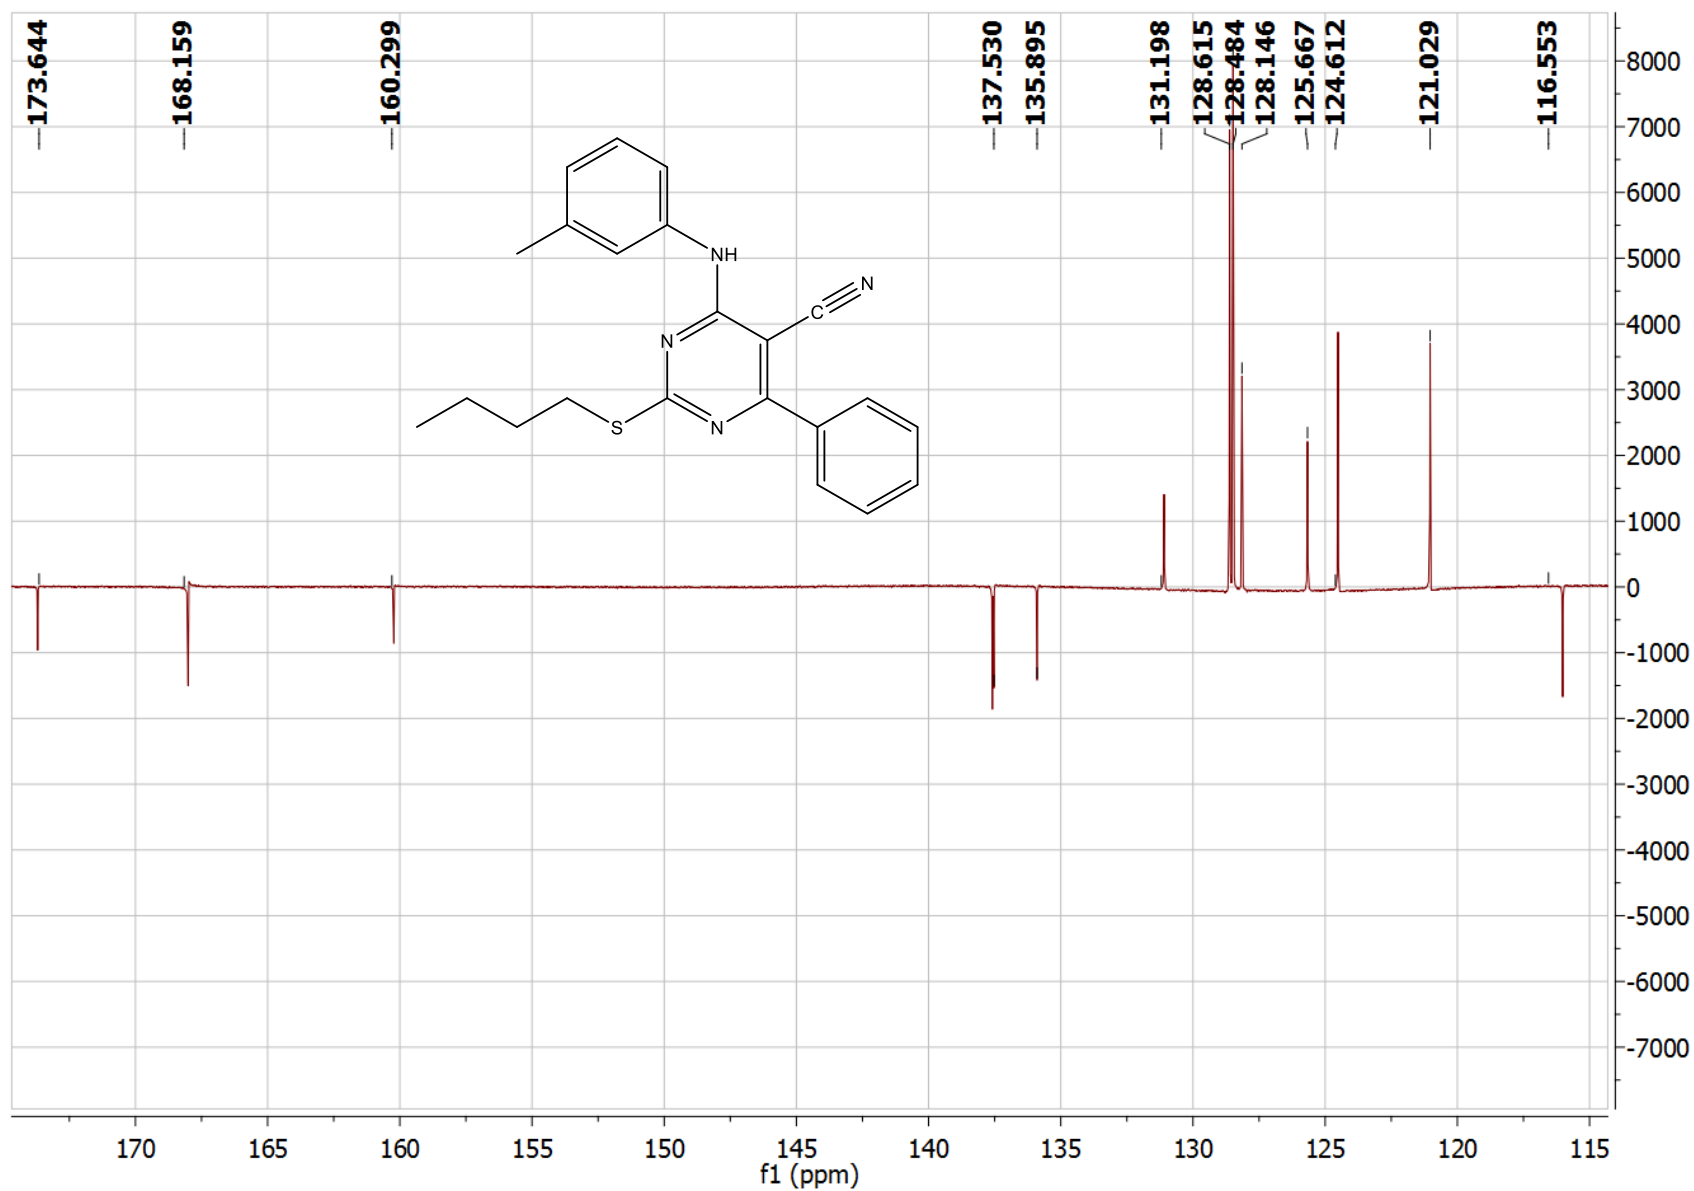

<sup>1</sup>H NMR of compound 10<sub>g</sub>

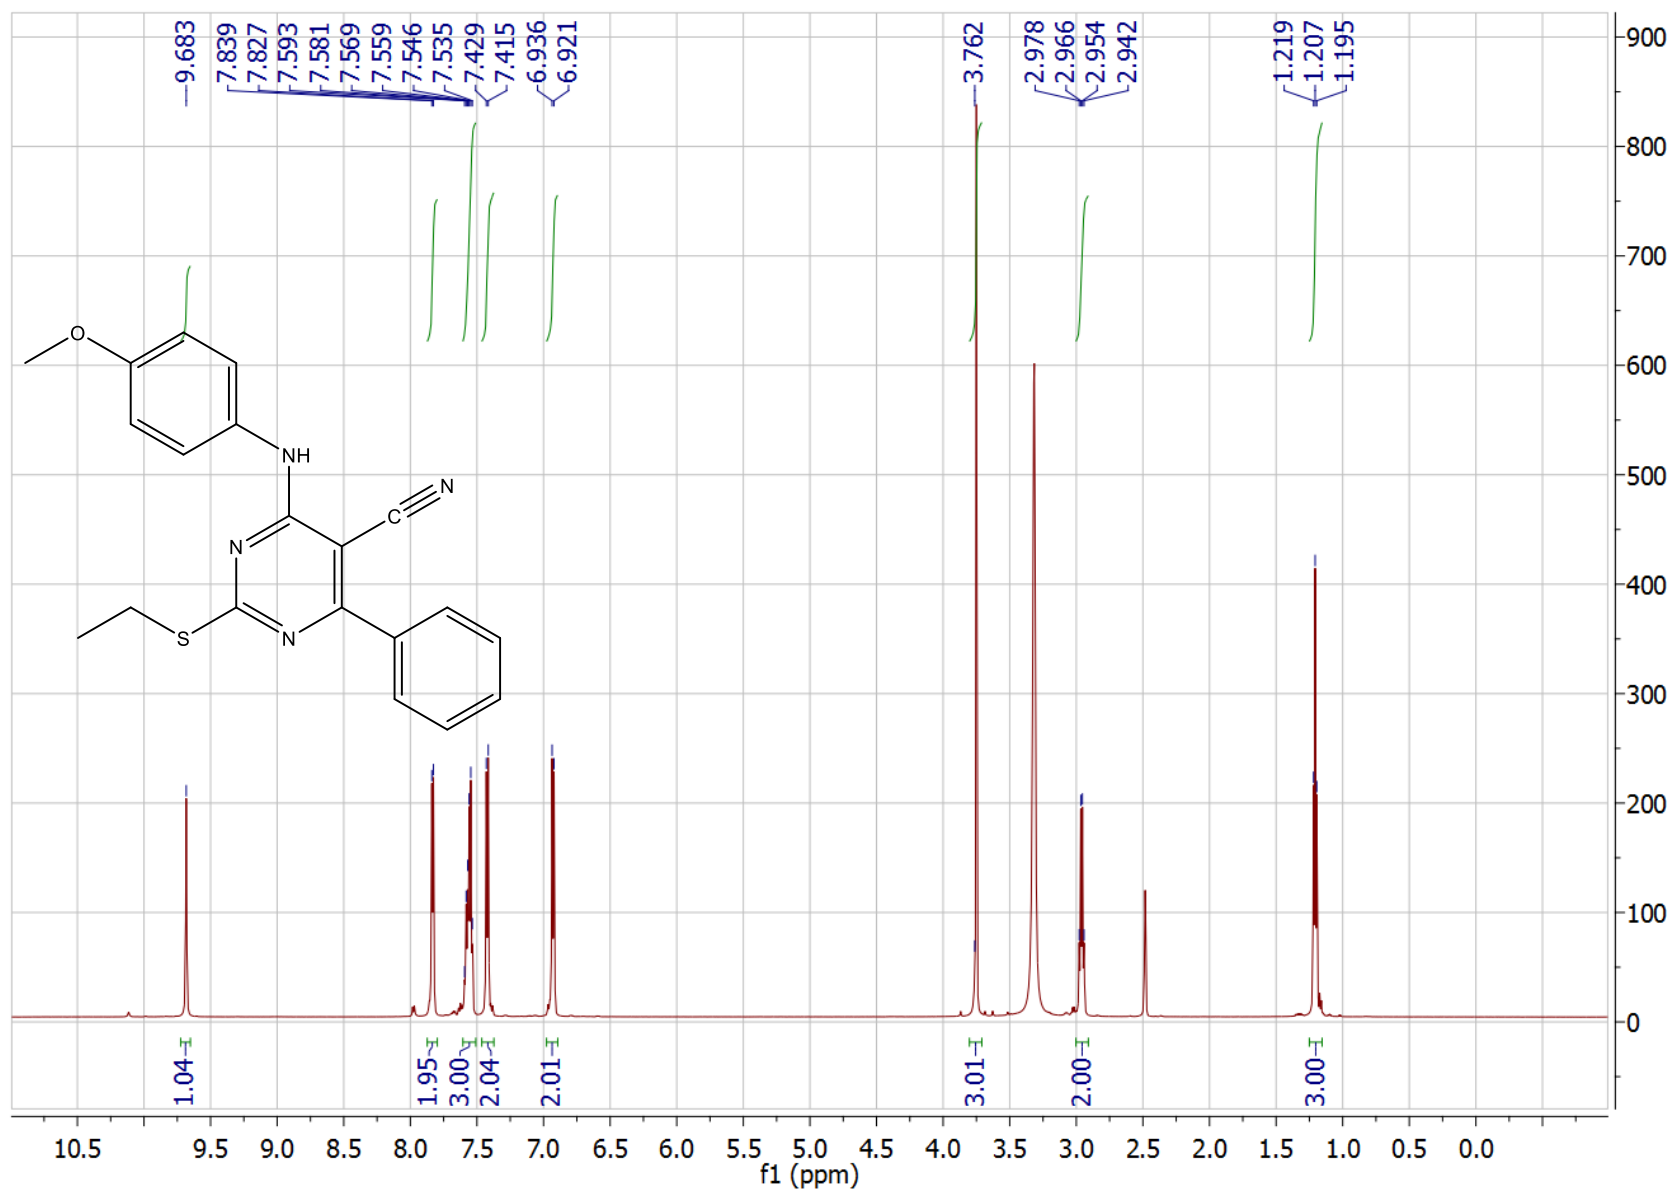

<sup>1</sup>H NMR of compound 10<sub>g</sub>

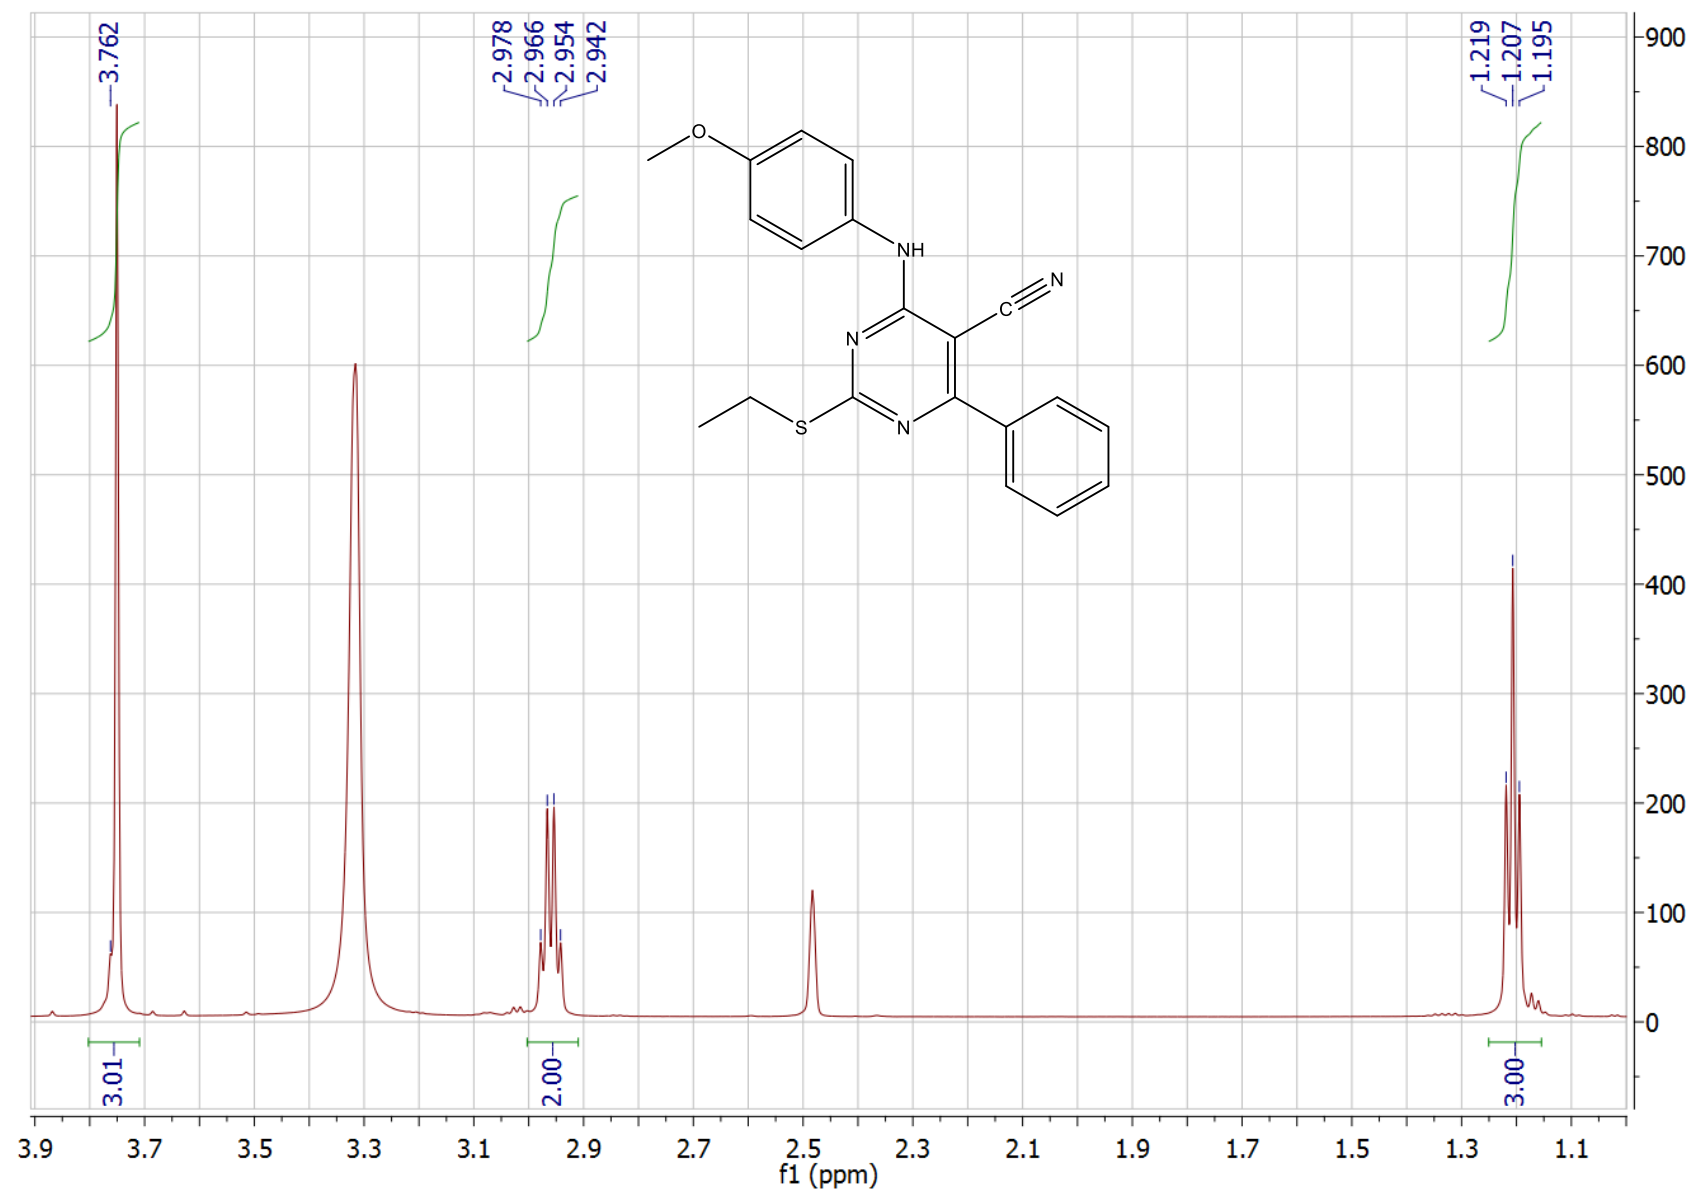

<sup>1</sup>H NMR of compound 10<sub>g</sub>

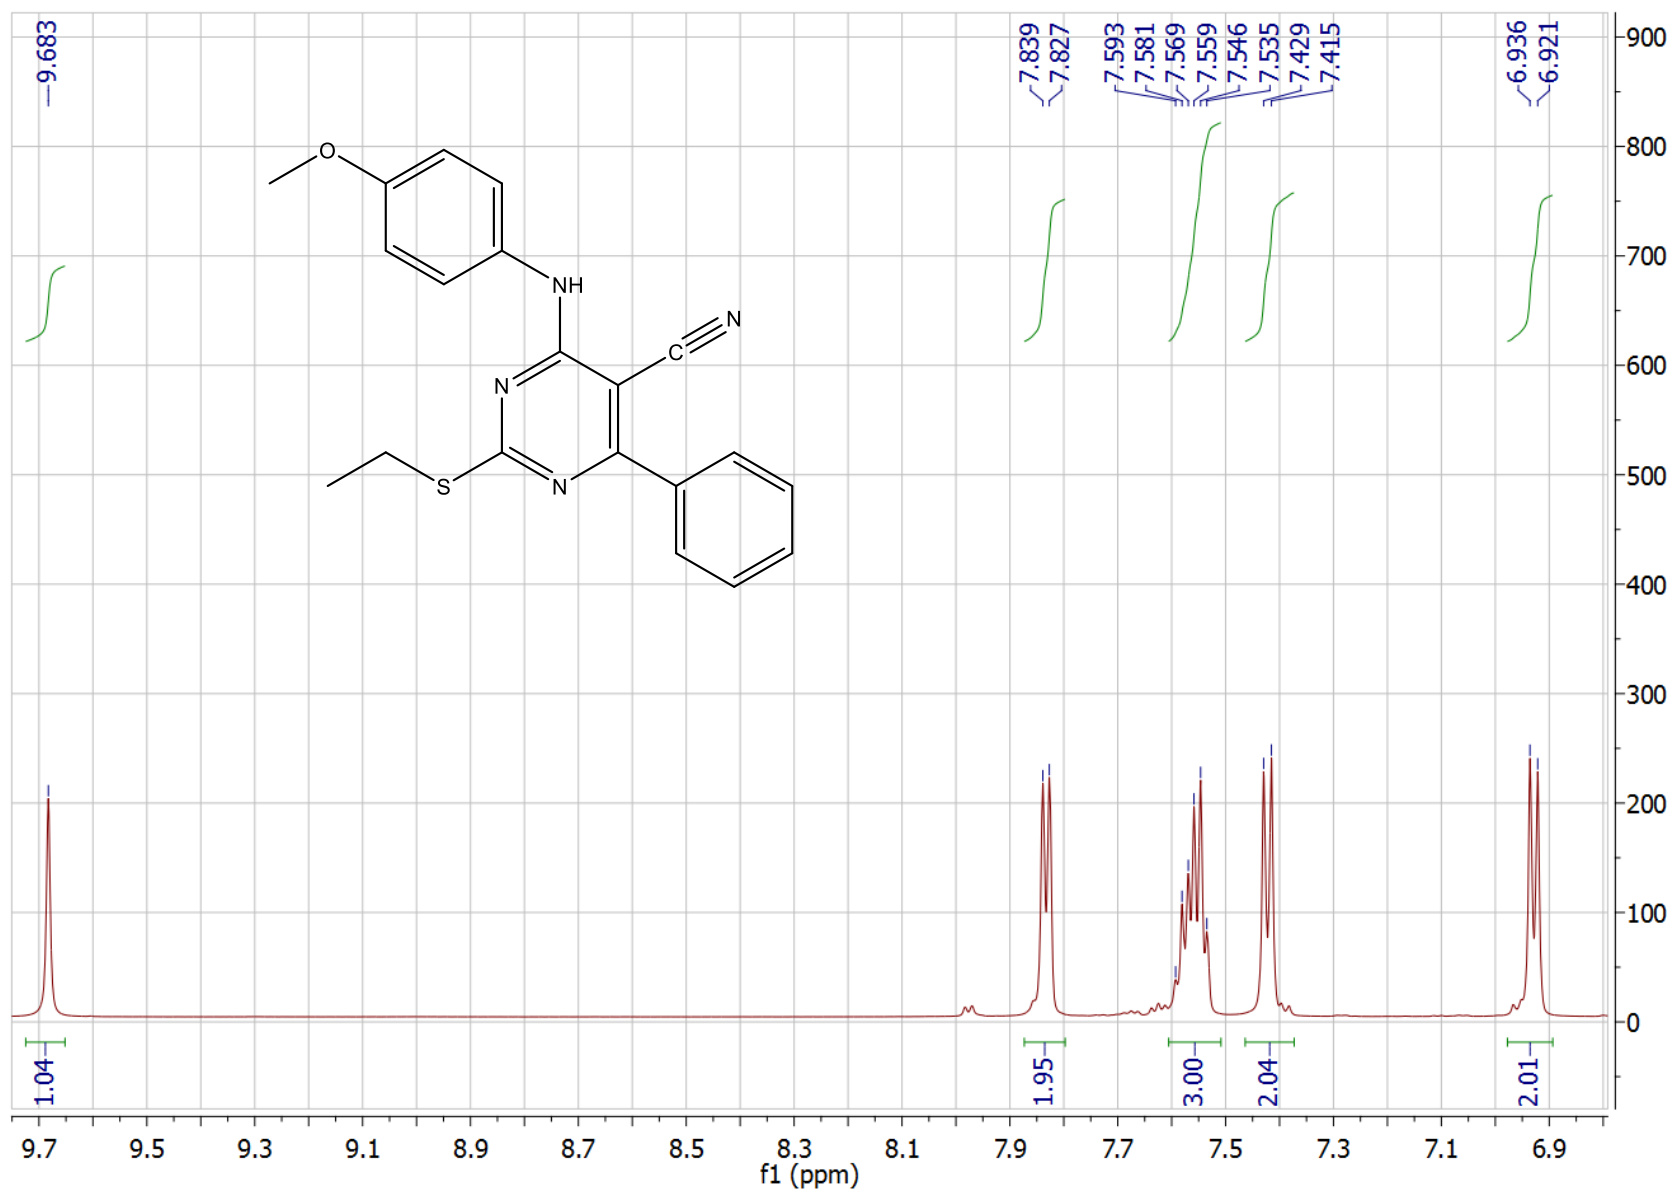

| Chemical Shift (ppm)                                   | Integration |
|--------------------------------------------------------|-------------|
| 9.683                                                  | 1.04        |
| 7.839, 7.827                                           | 1.95        |
| 7.593, 7.581, 7.569, 7.559, 7.546, 7.535, 7.429, 7.415 | 3.00        |
| 7.415                                                  | 2.04        |
| 6.936, 6.921                                           | 2.01        |

<sup>13</sup>C NMR of compound 10<sub>g</sub>

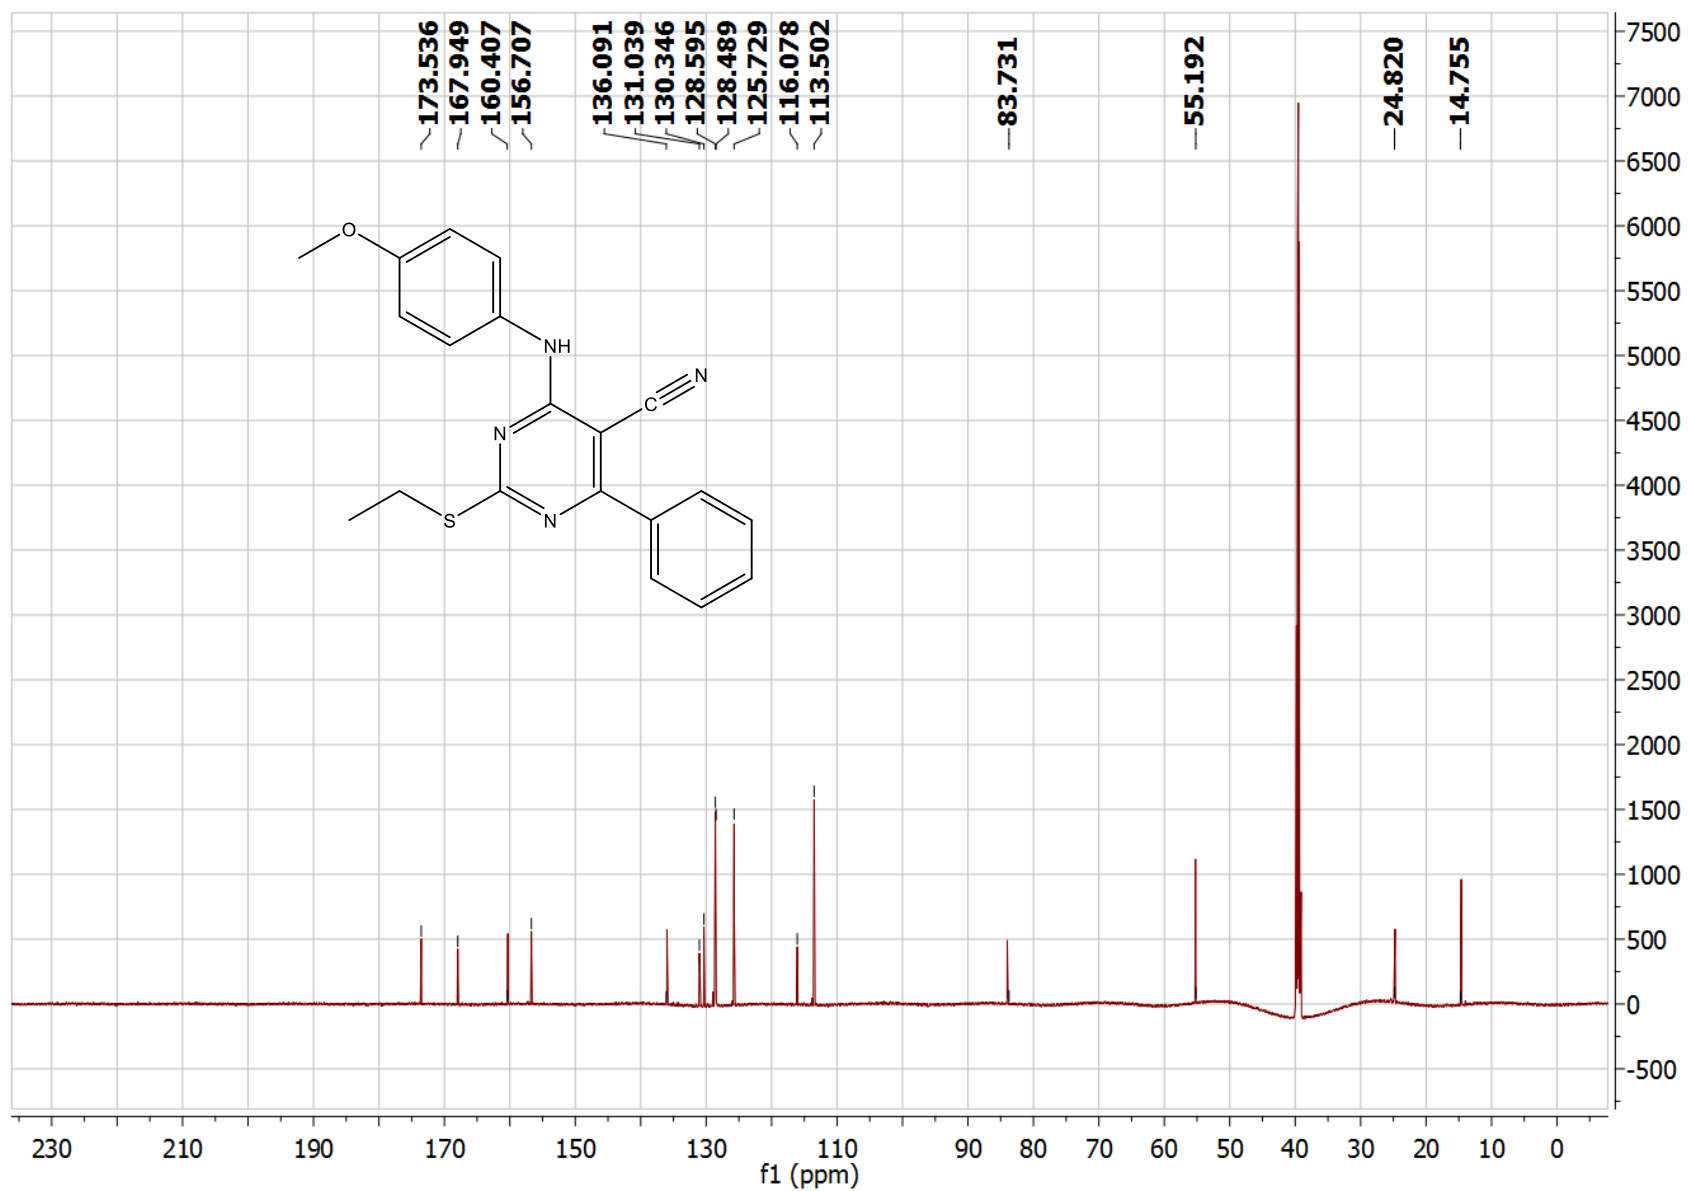



<sup>13</sup>C NMR of compound 10<sub>g</sub>

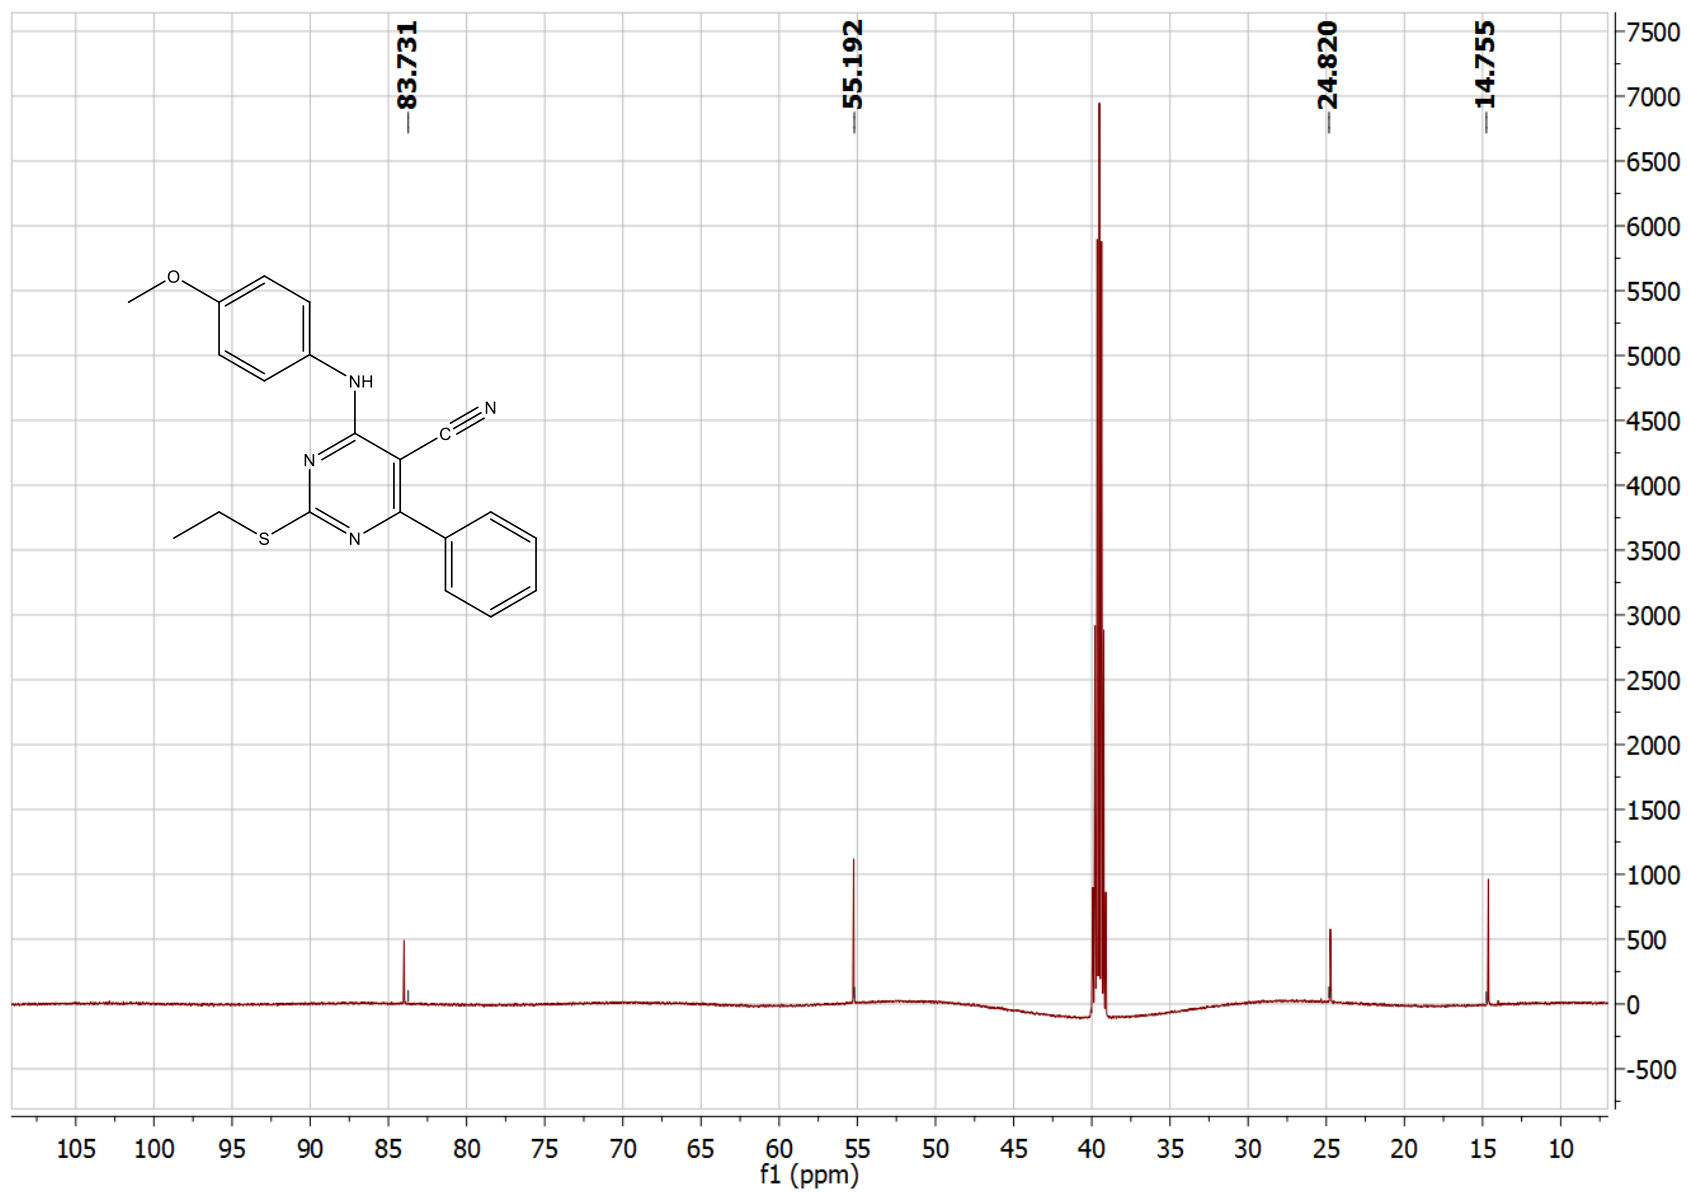

<sup>13</sup>C NMR of compound 10<sub>g</sub>

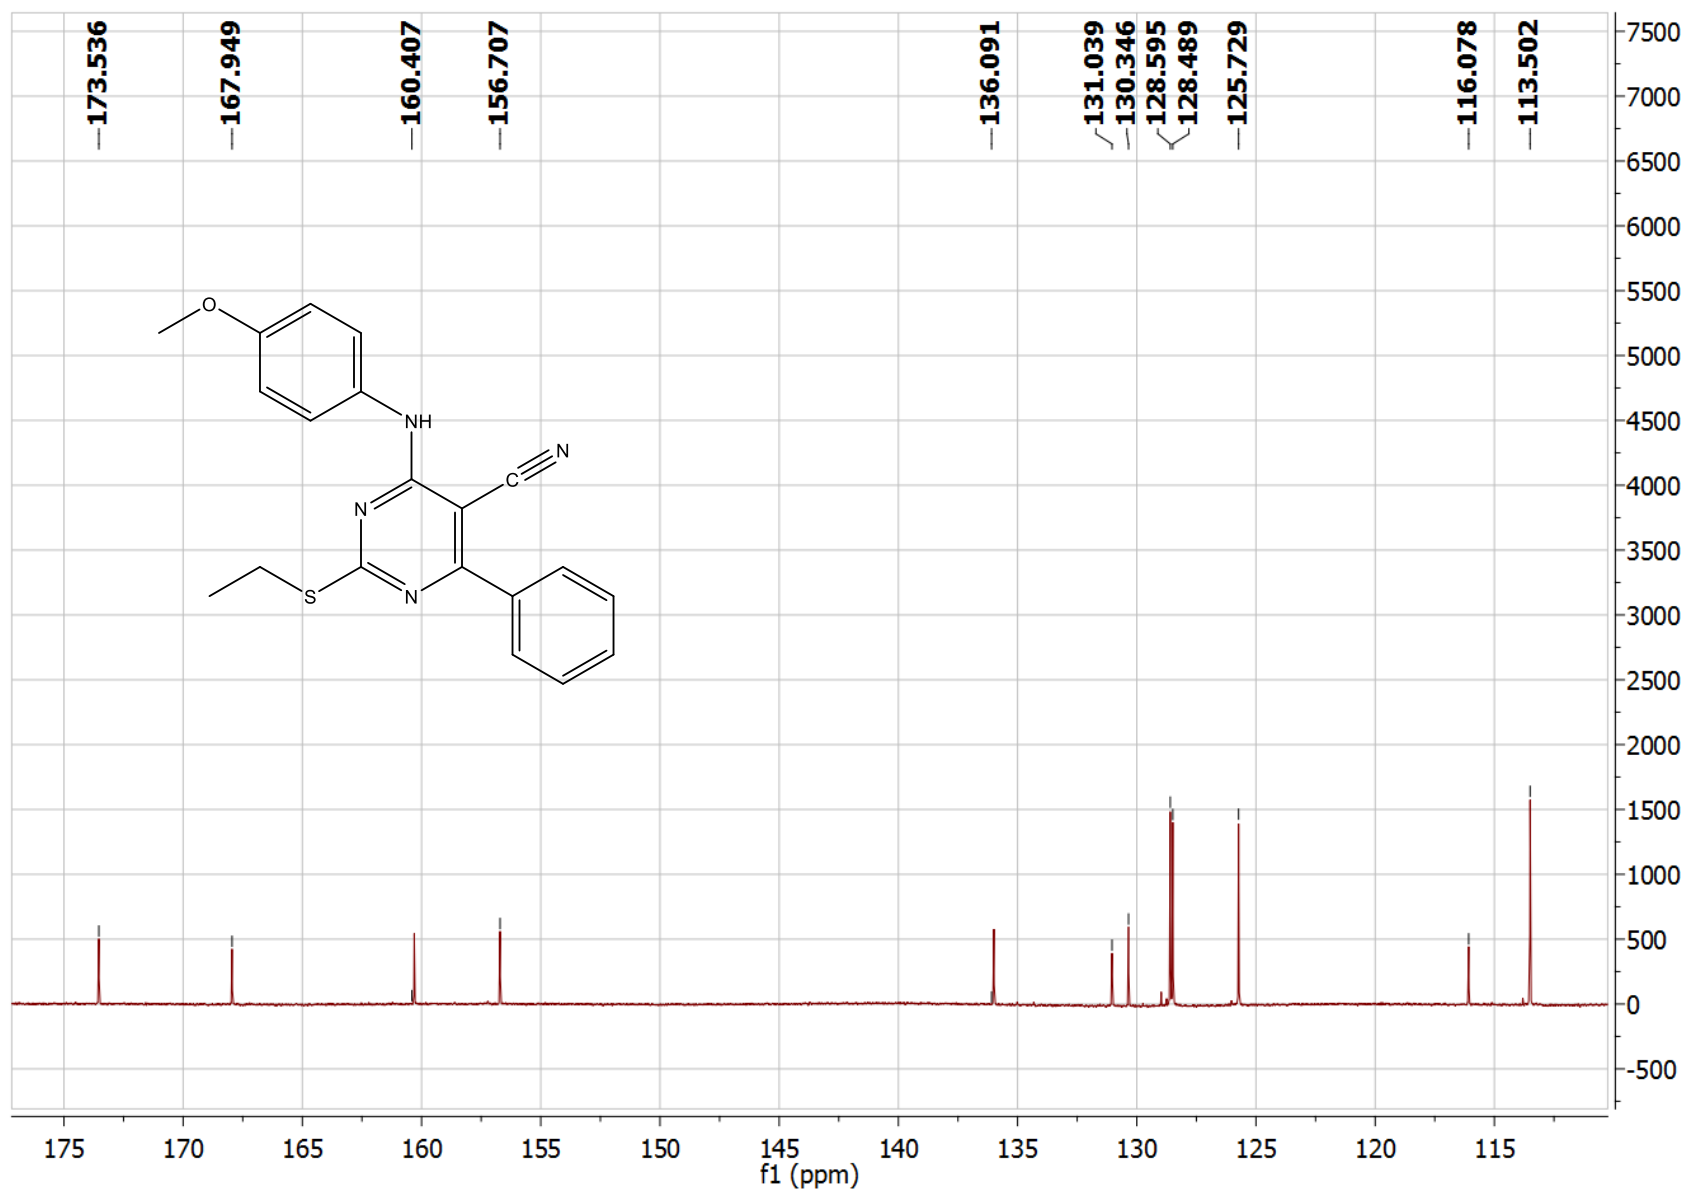

APT of compound 10<sub>g</sub>

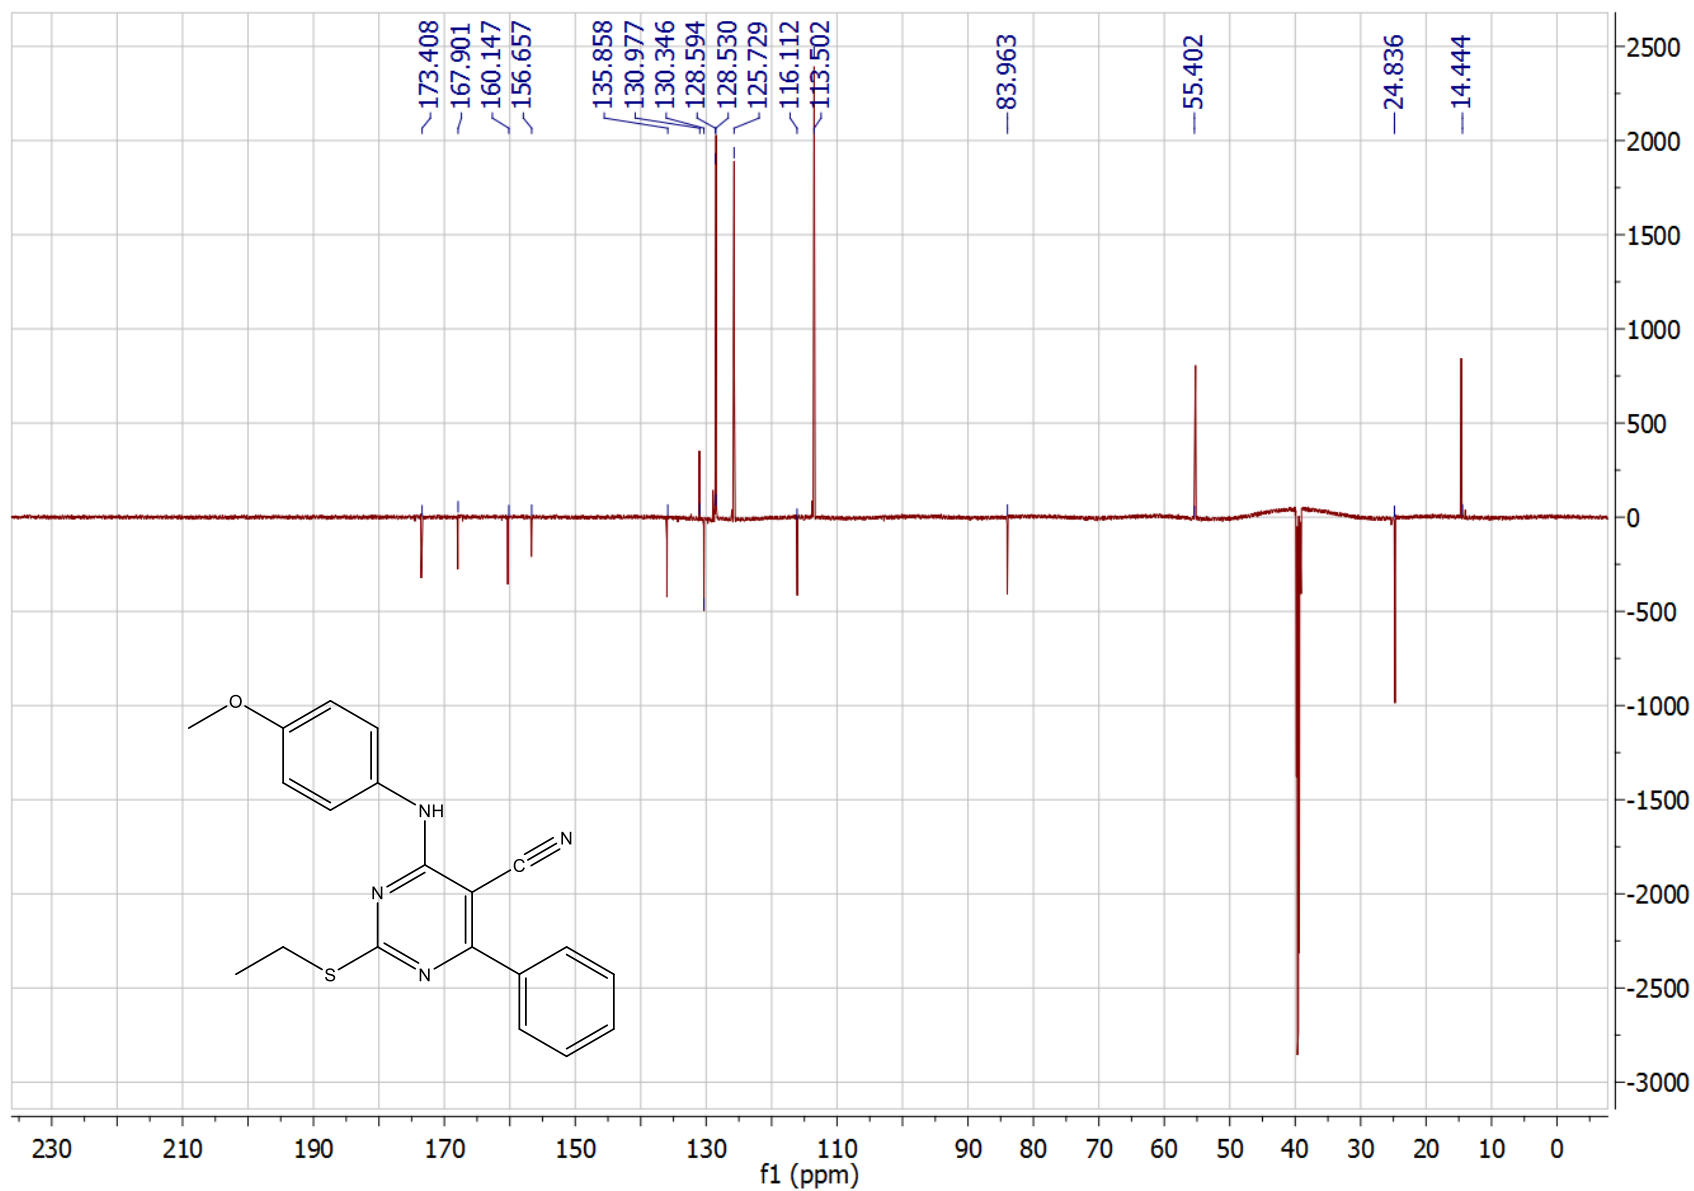

<sup>1</sup>H NMR of compound 10<sub>h</sub>

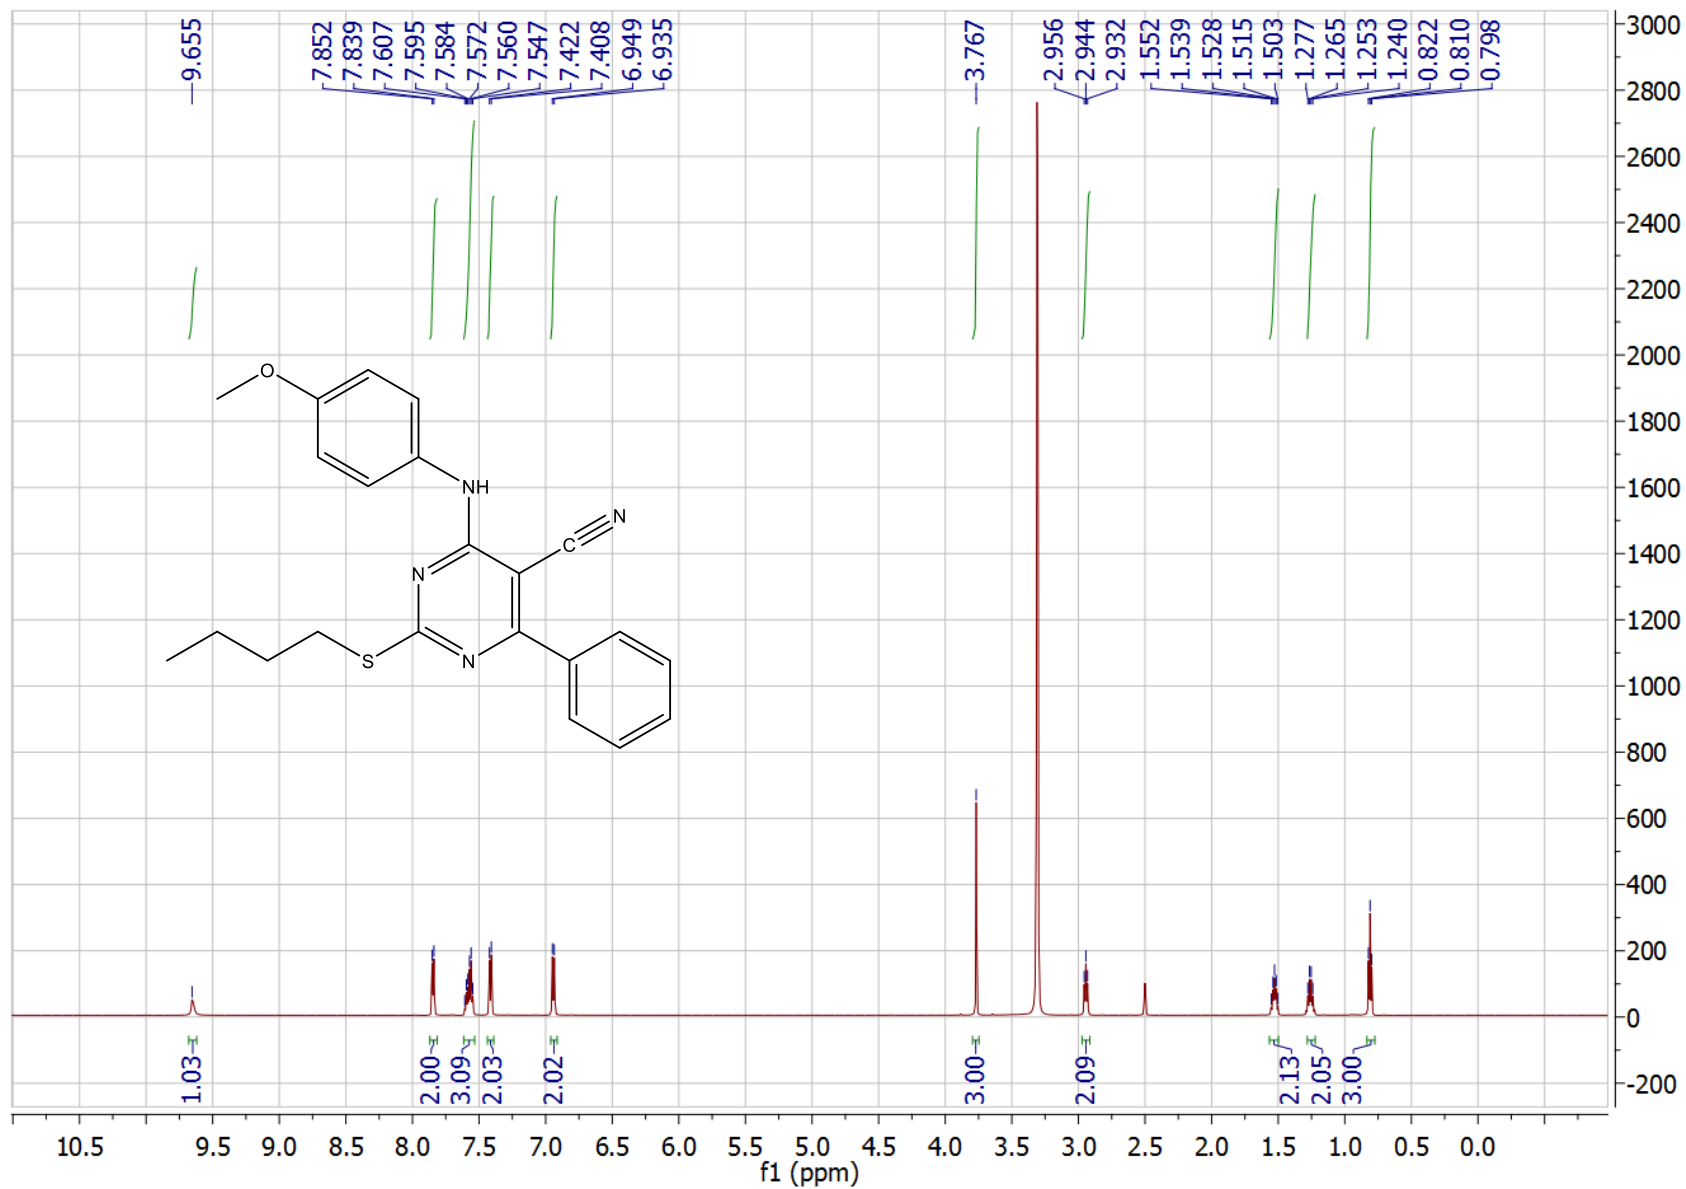

<sup>1</sup>H NMR of compound 10<sub>h</sub>

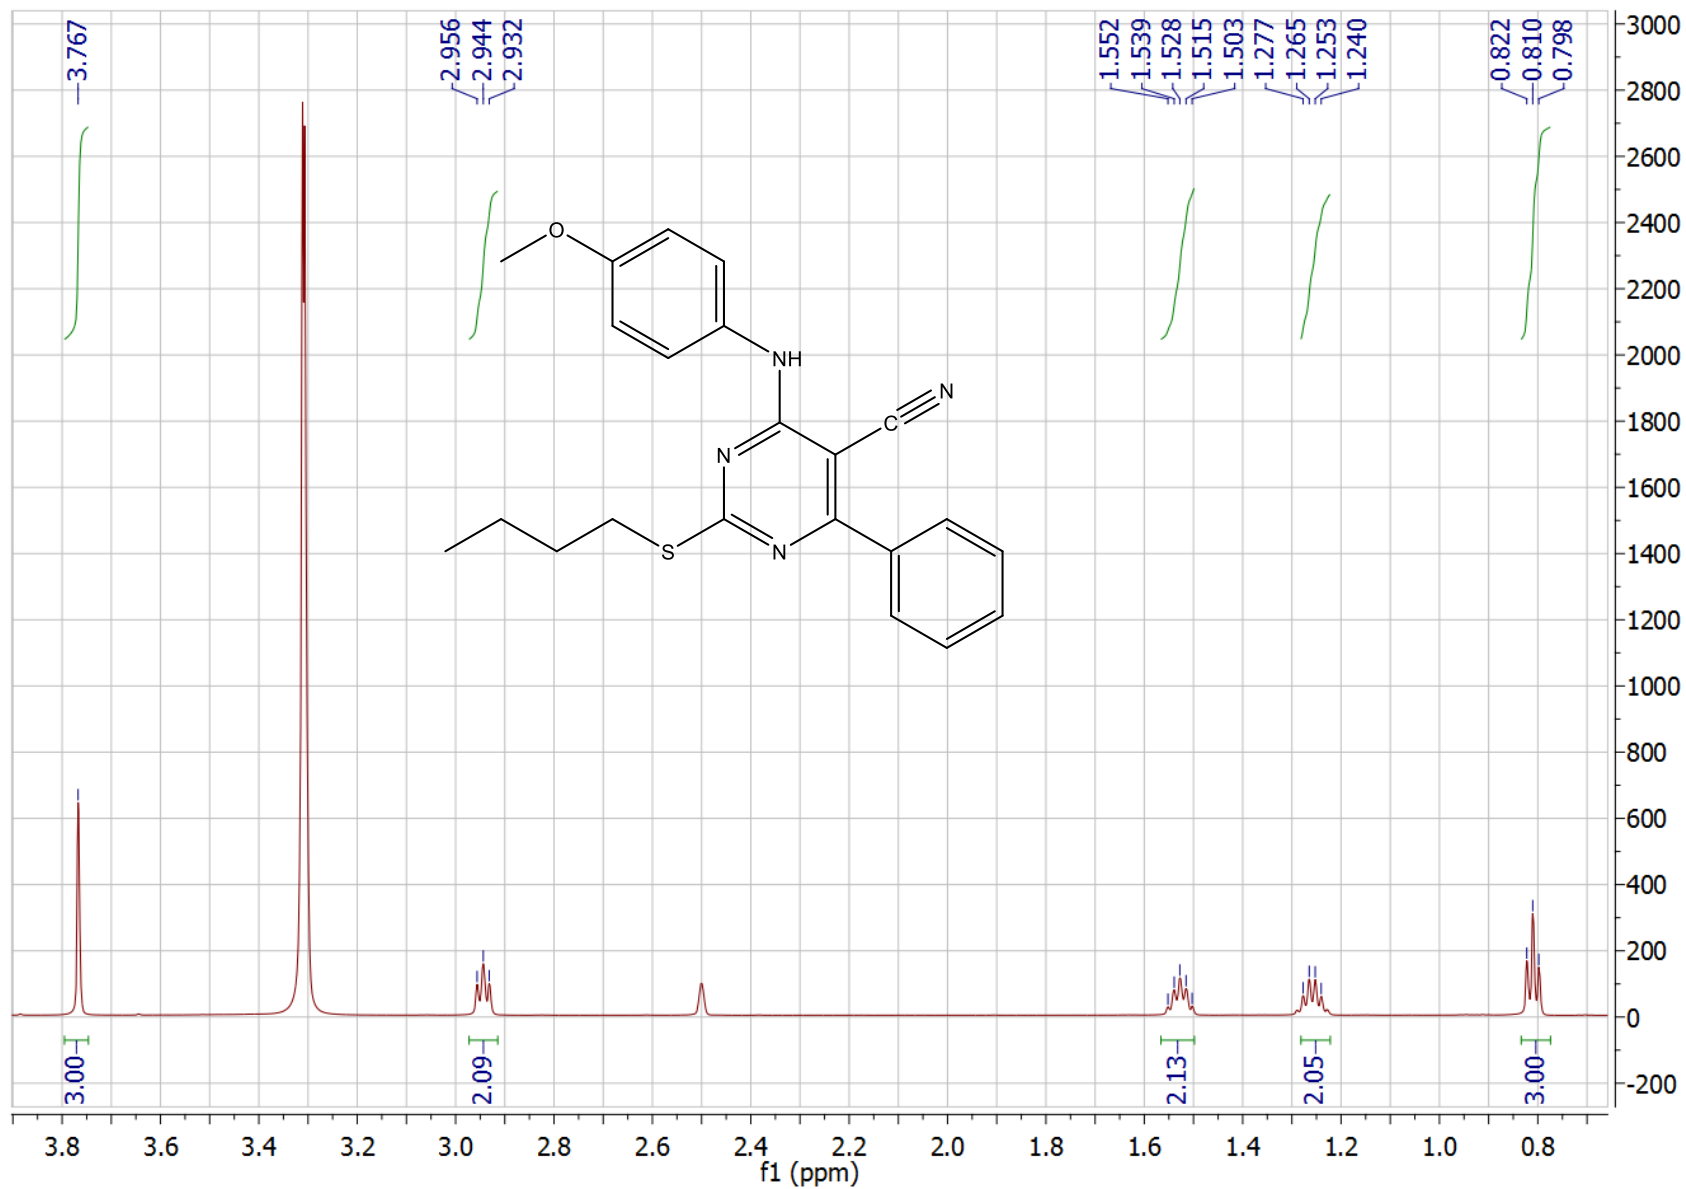

<sup>1</sup>H NMR of compound 10<sub>h</sub>

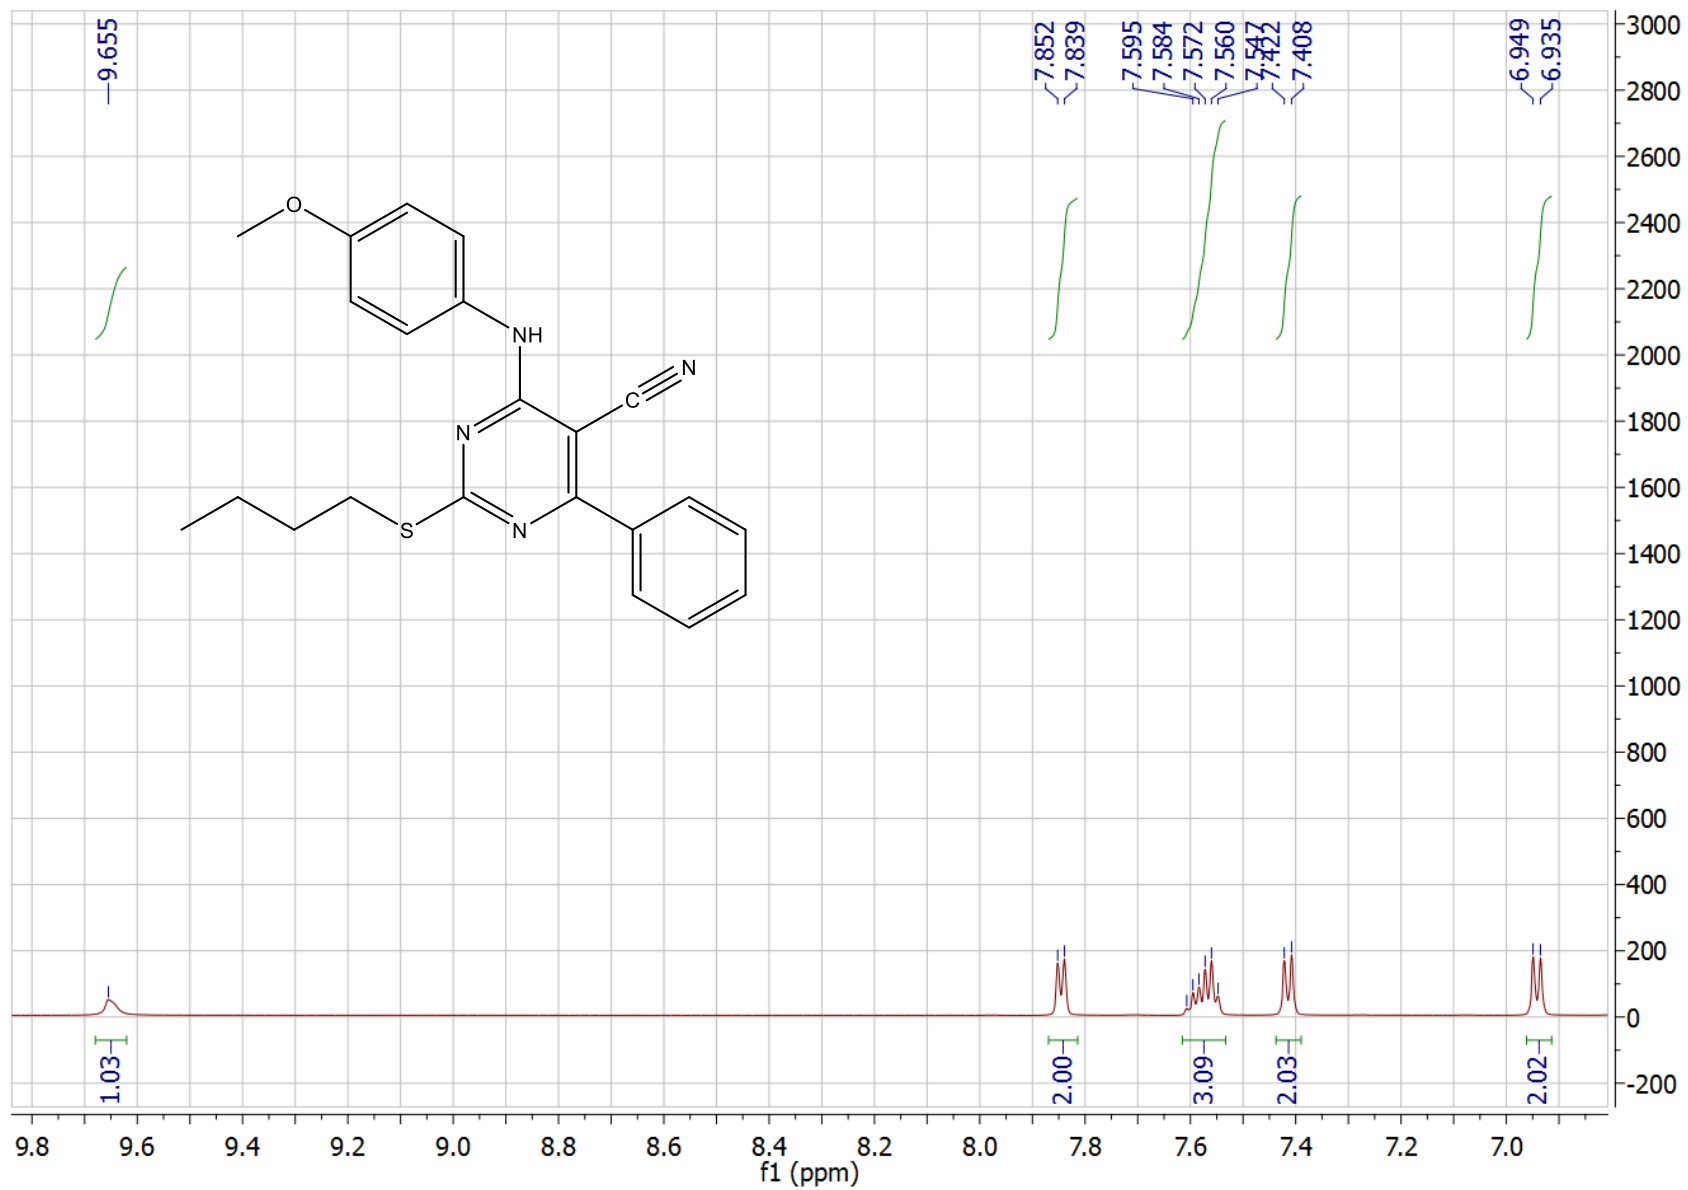

<sup>13</sup>C NMR of compound 10<sub>h</sub>

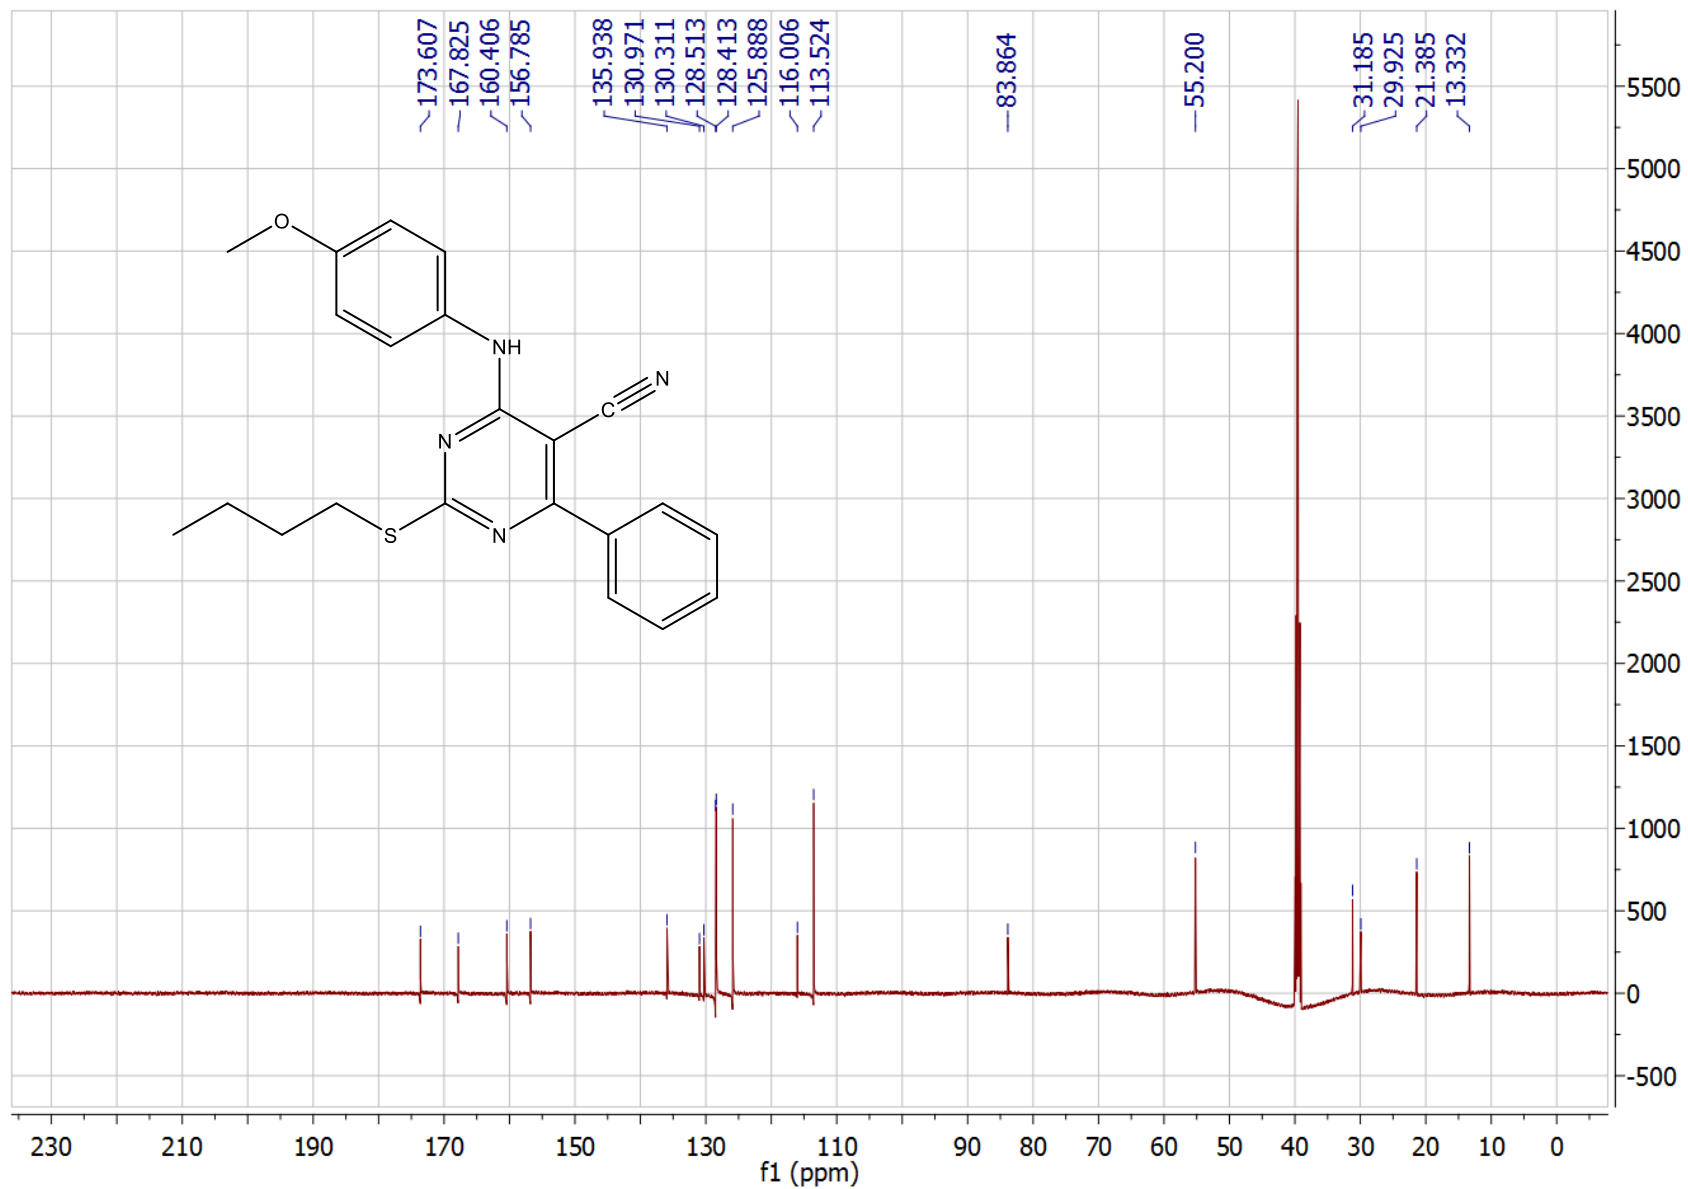

<sup>13</sup>C NMR of compound 10<sub>h</sub>

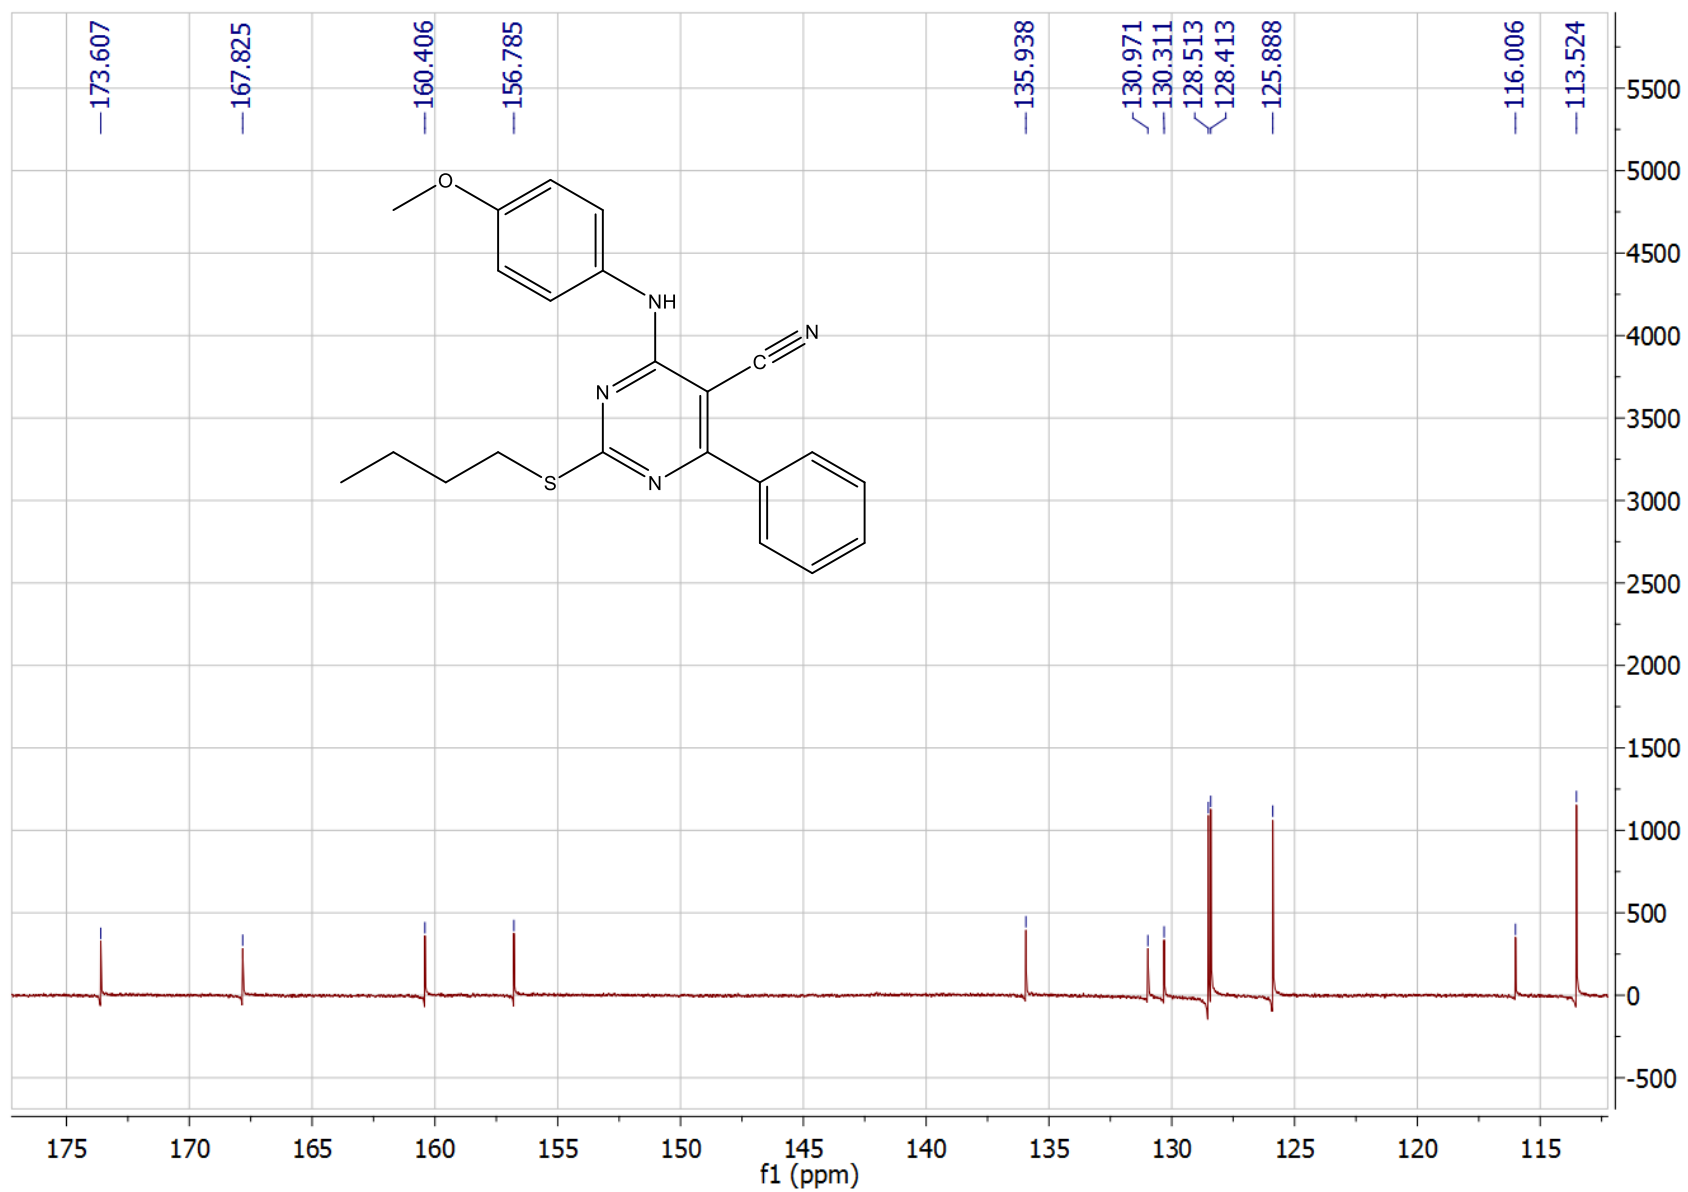



APT of compound 10h

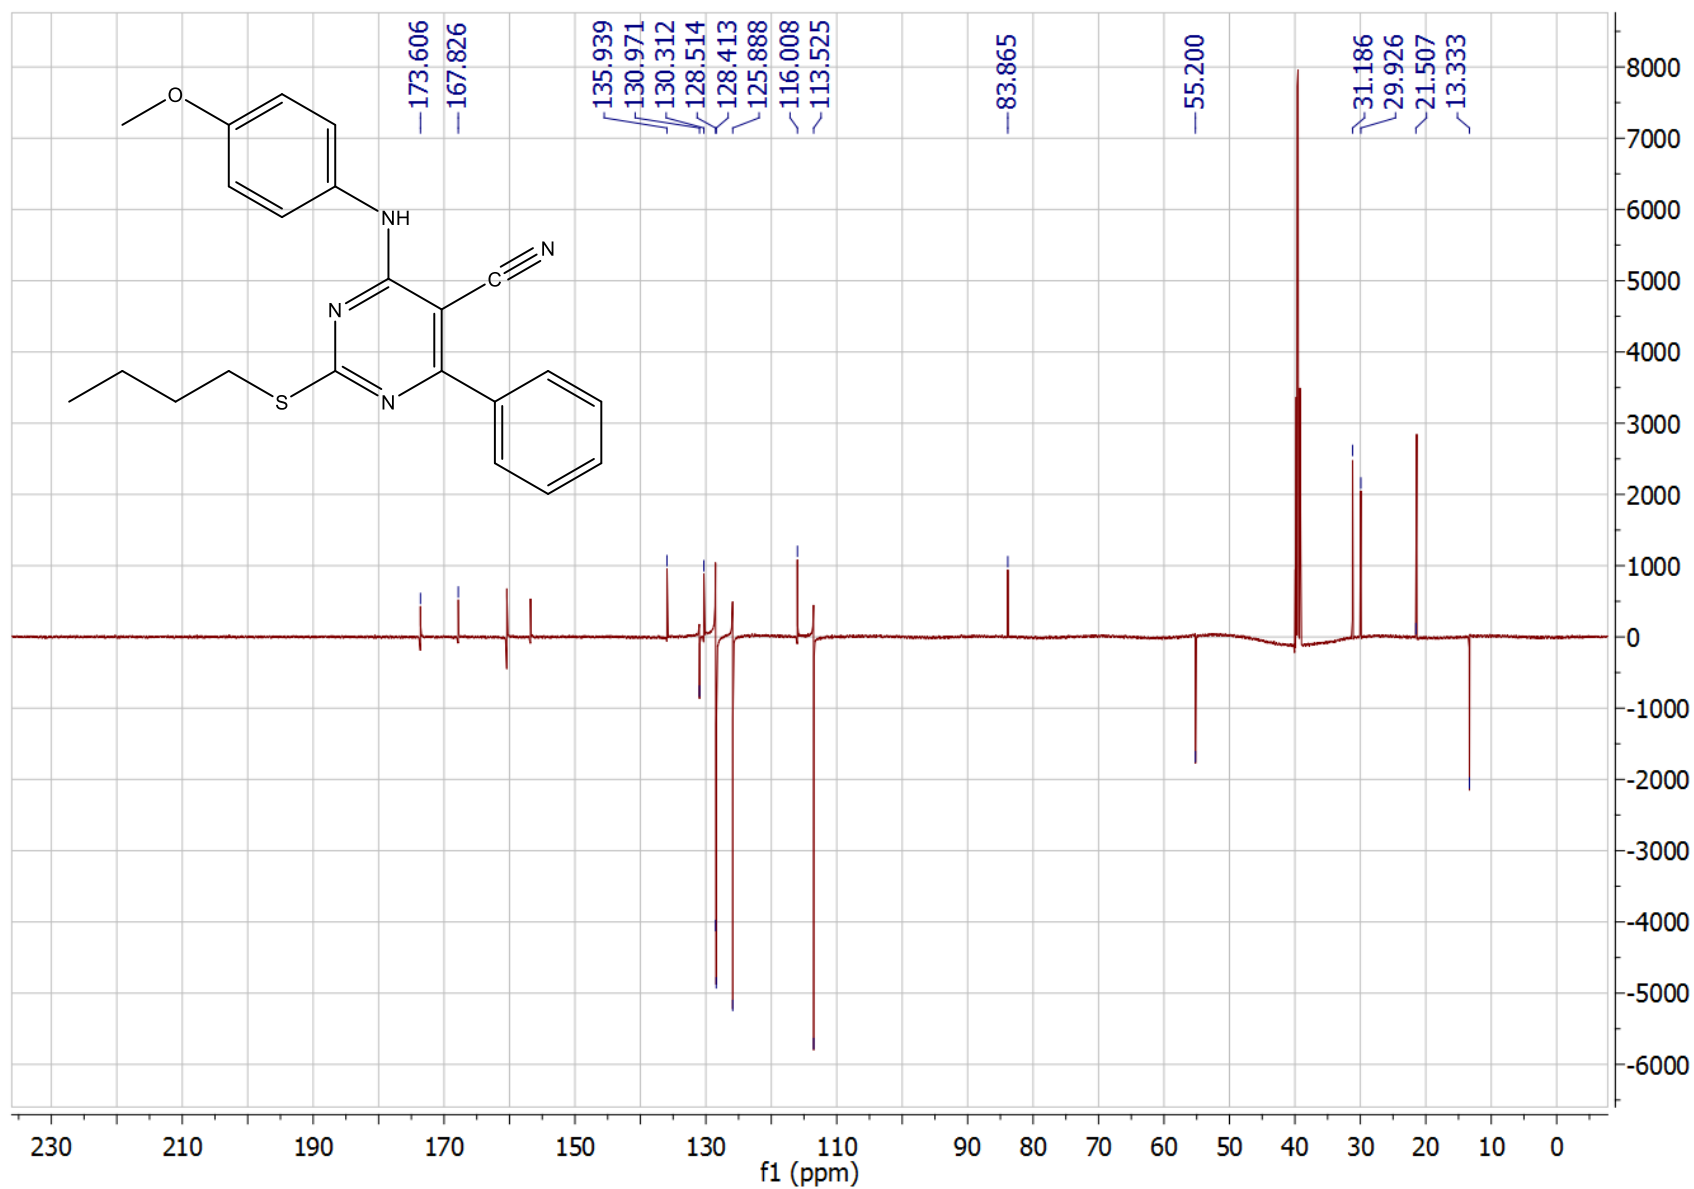

APT of compound 10<sub>h</sub>

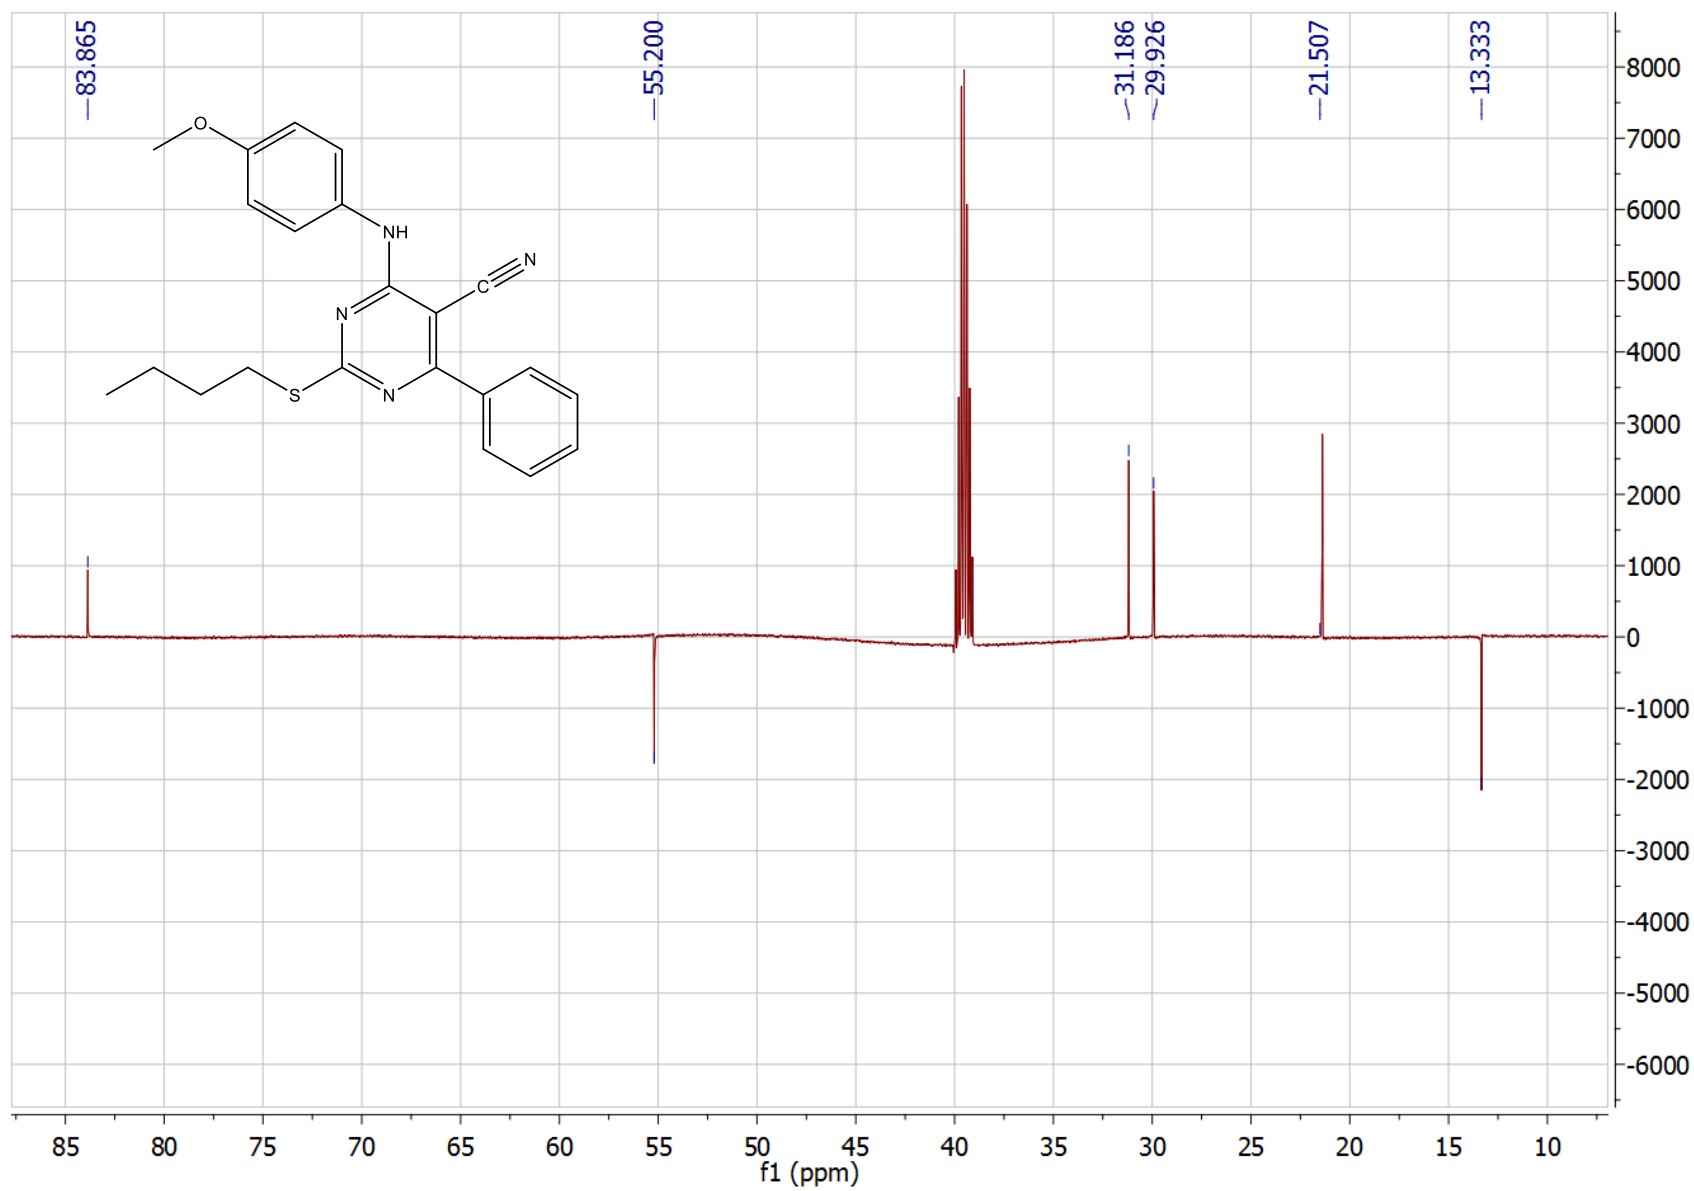

APT of compound 10<sub>h</sub>

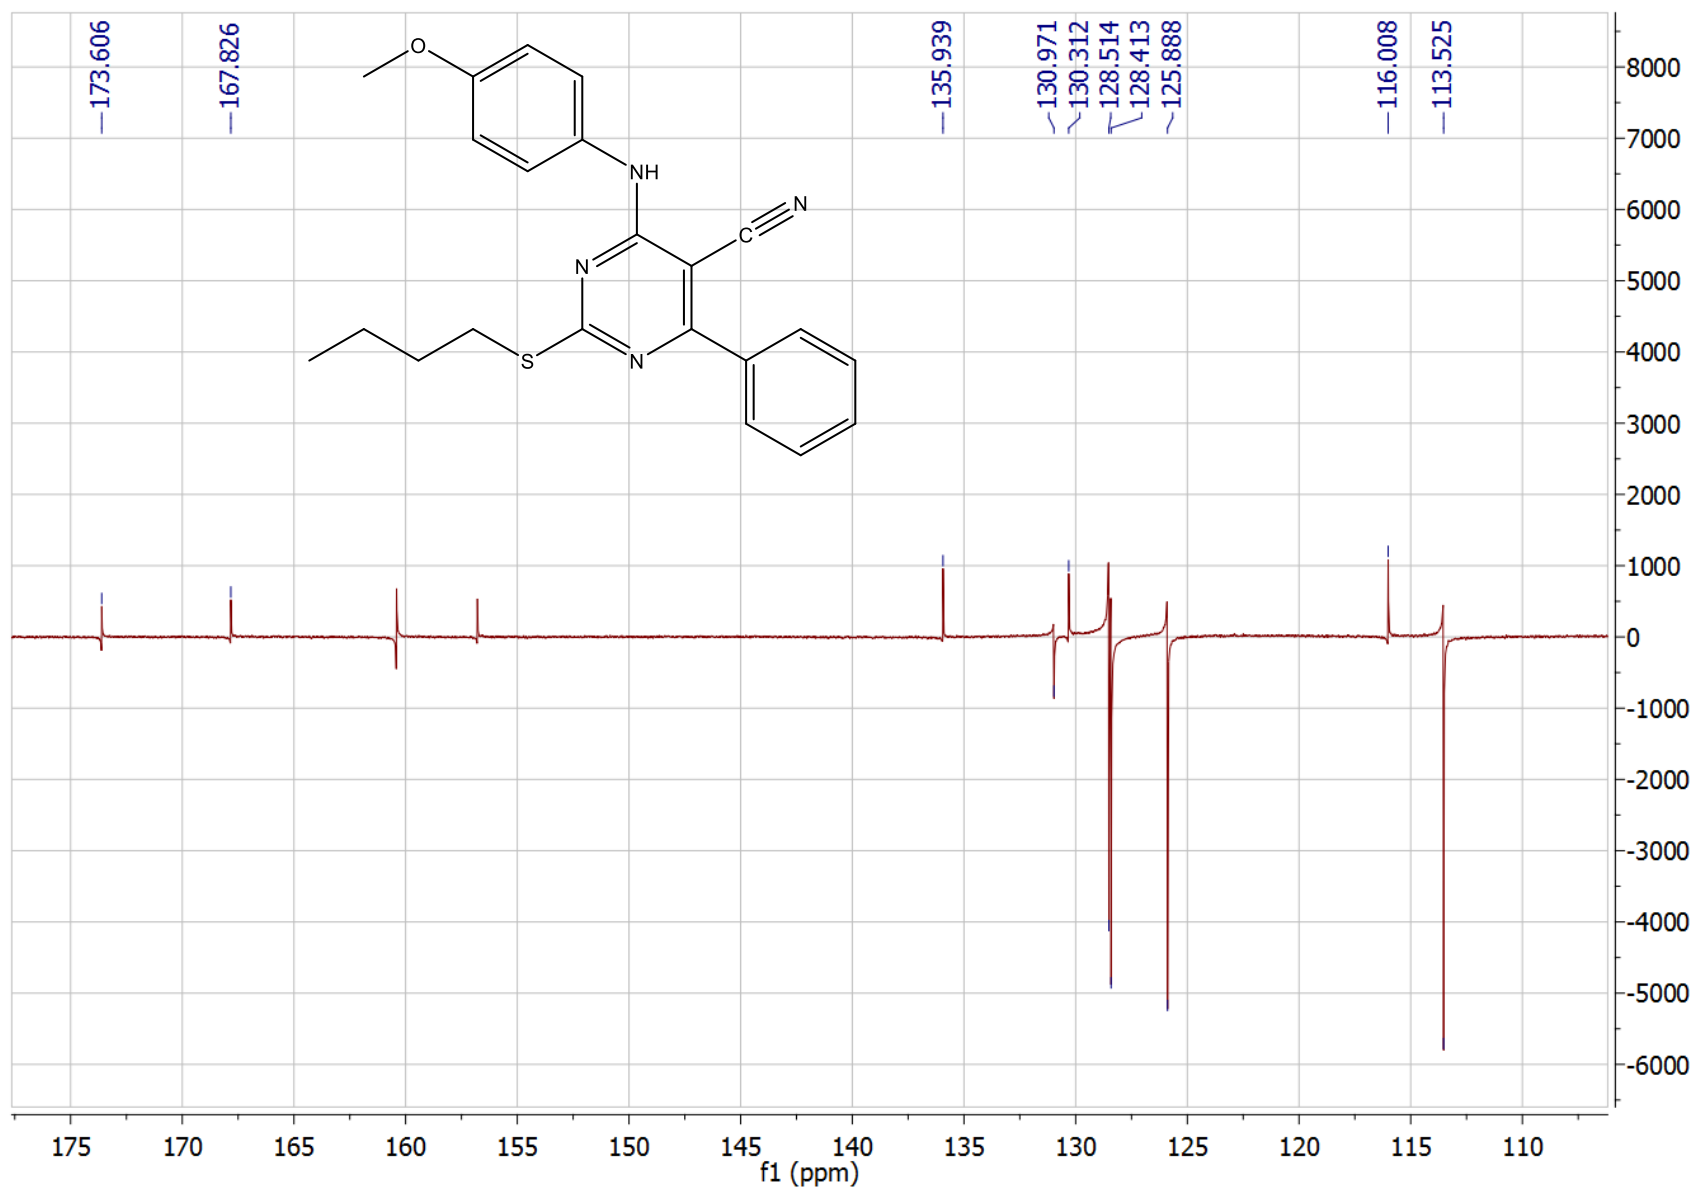

<sup>1</sup>H NMR of compound 11<sub>a</sub>

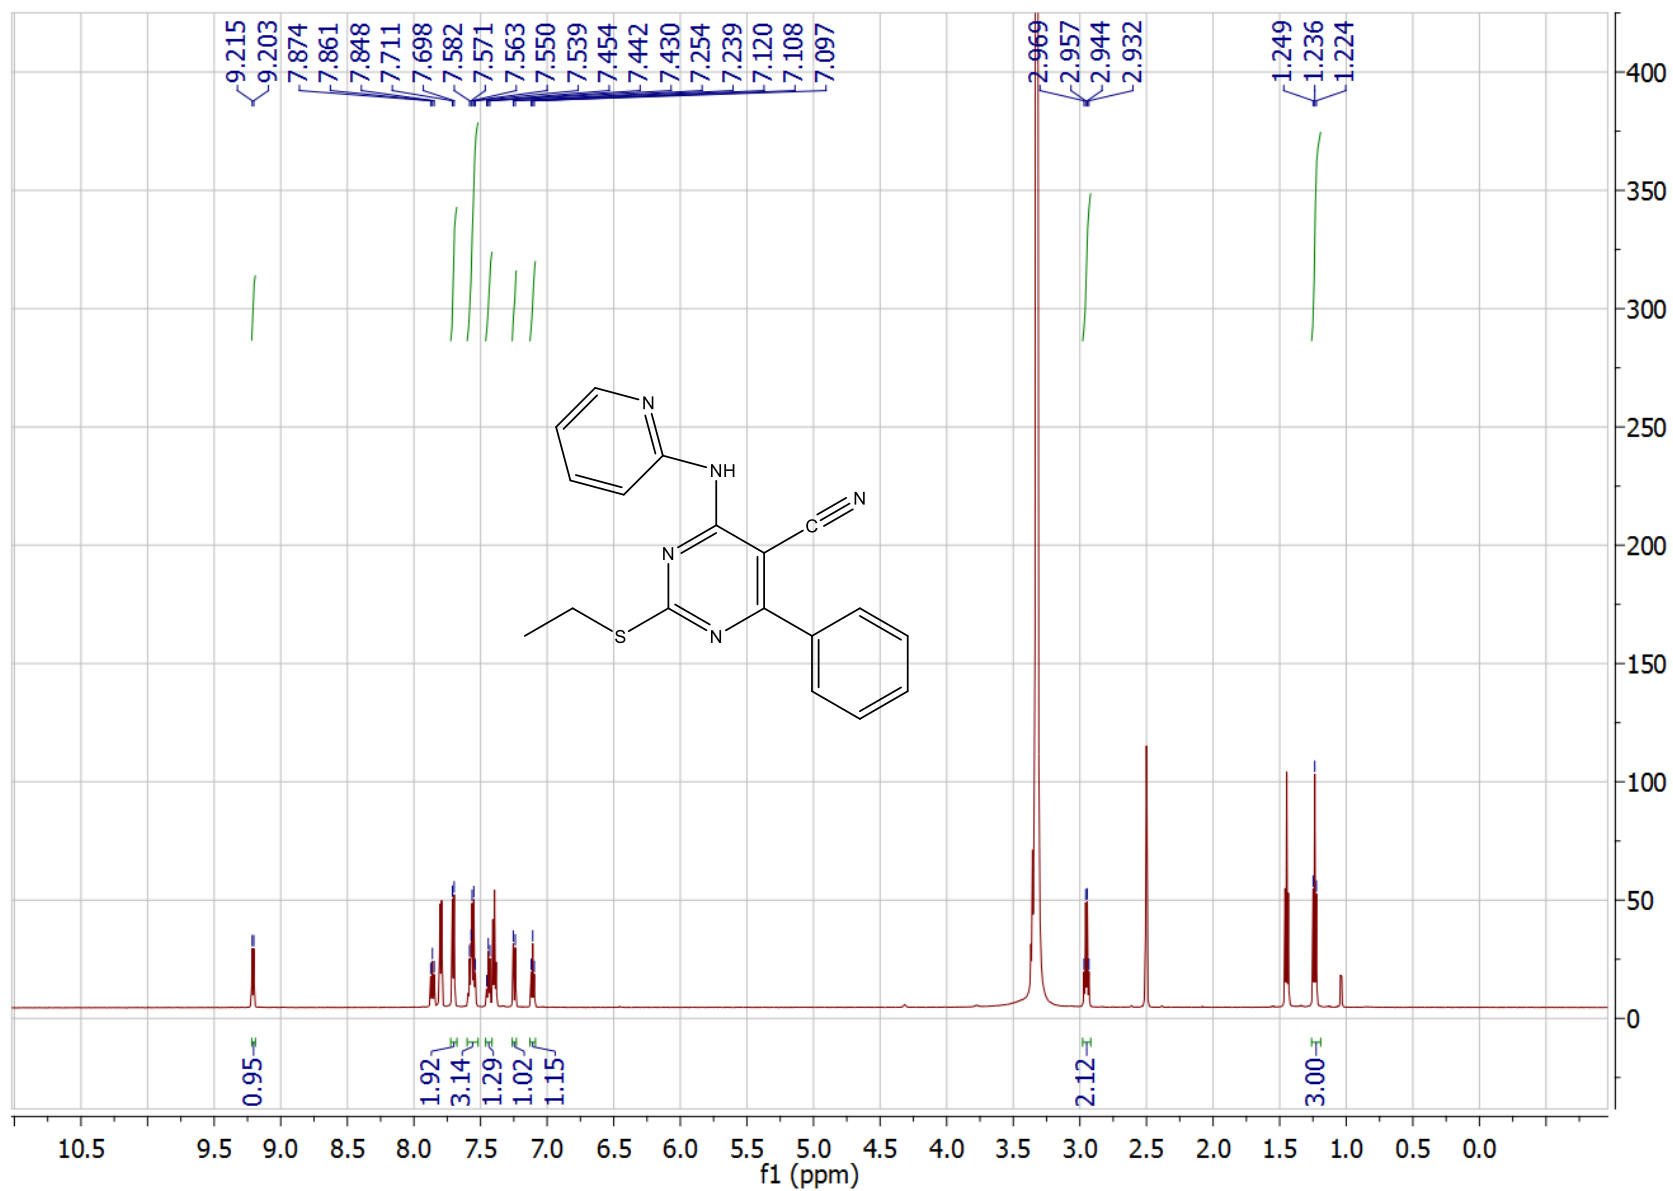

<sup>1</sup>H NMR of compound 11<sub>a</sub>

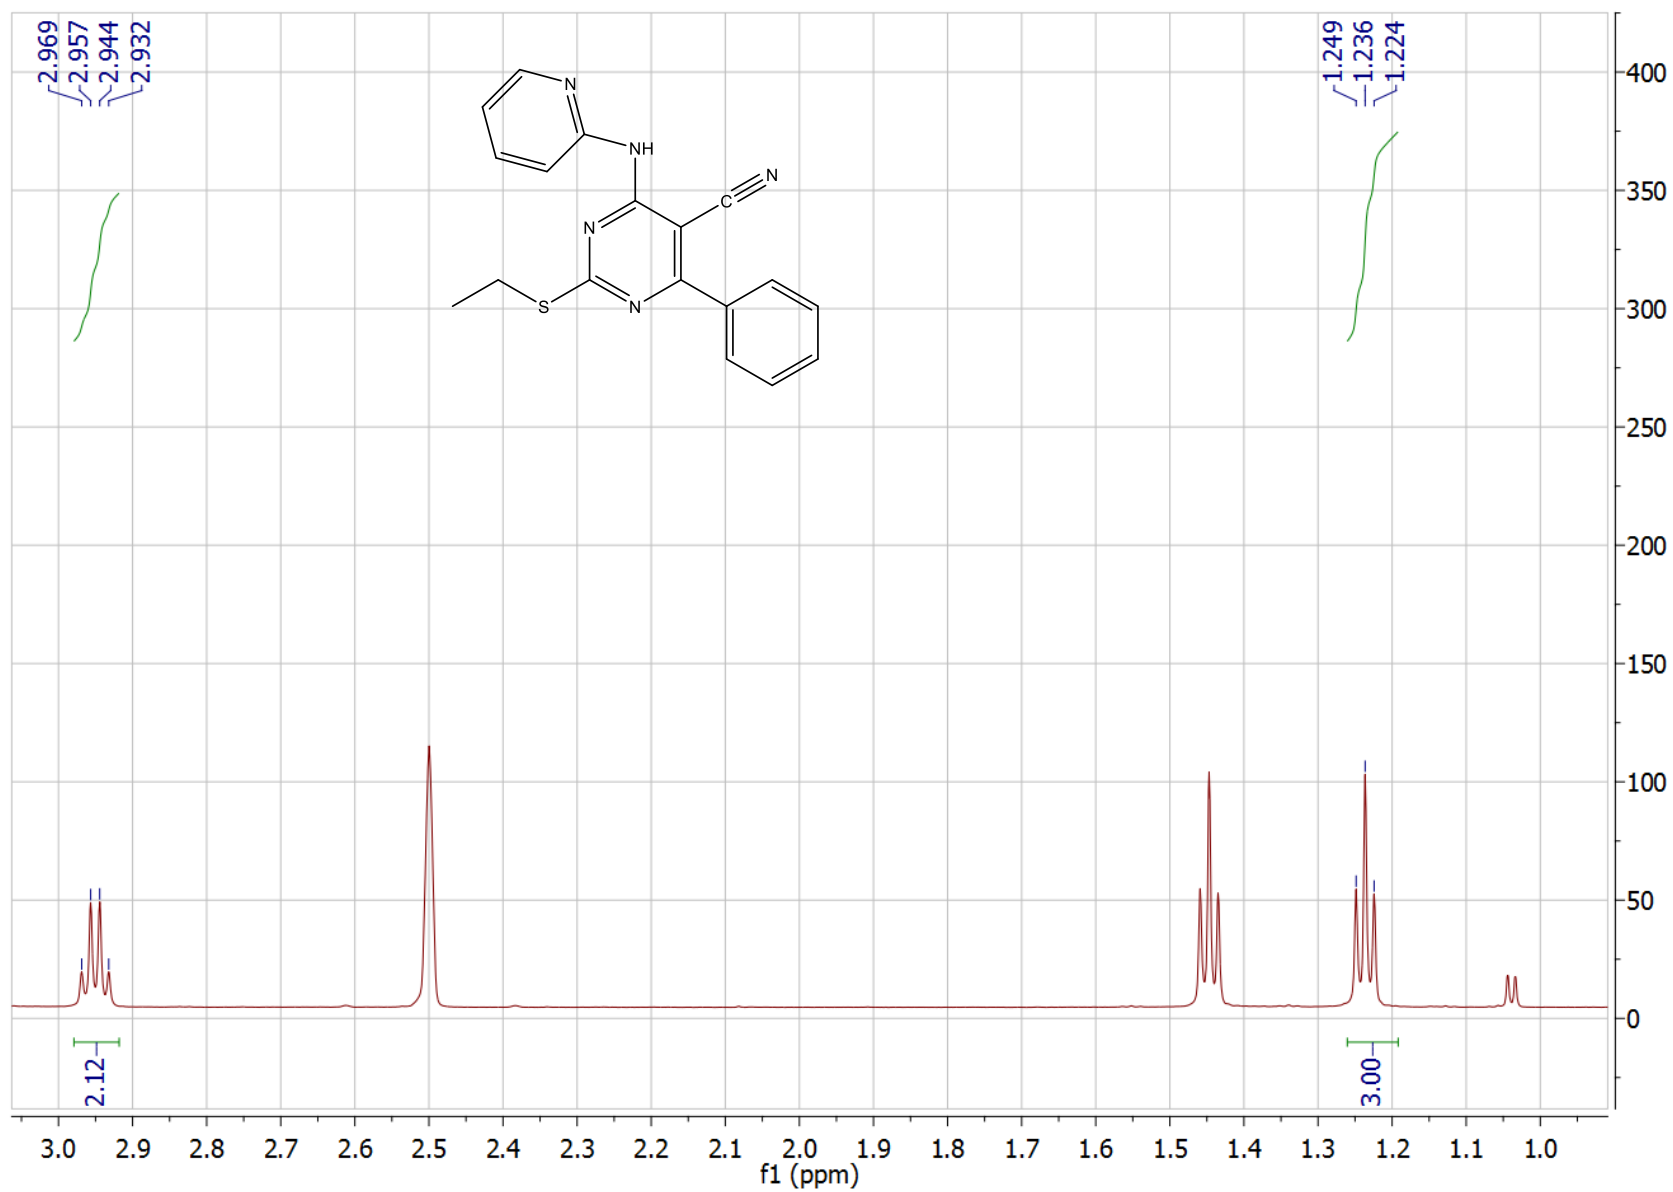

<sup>1</sup>H NMR of compound 11<sub>a</sub>

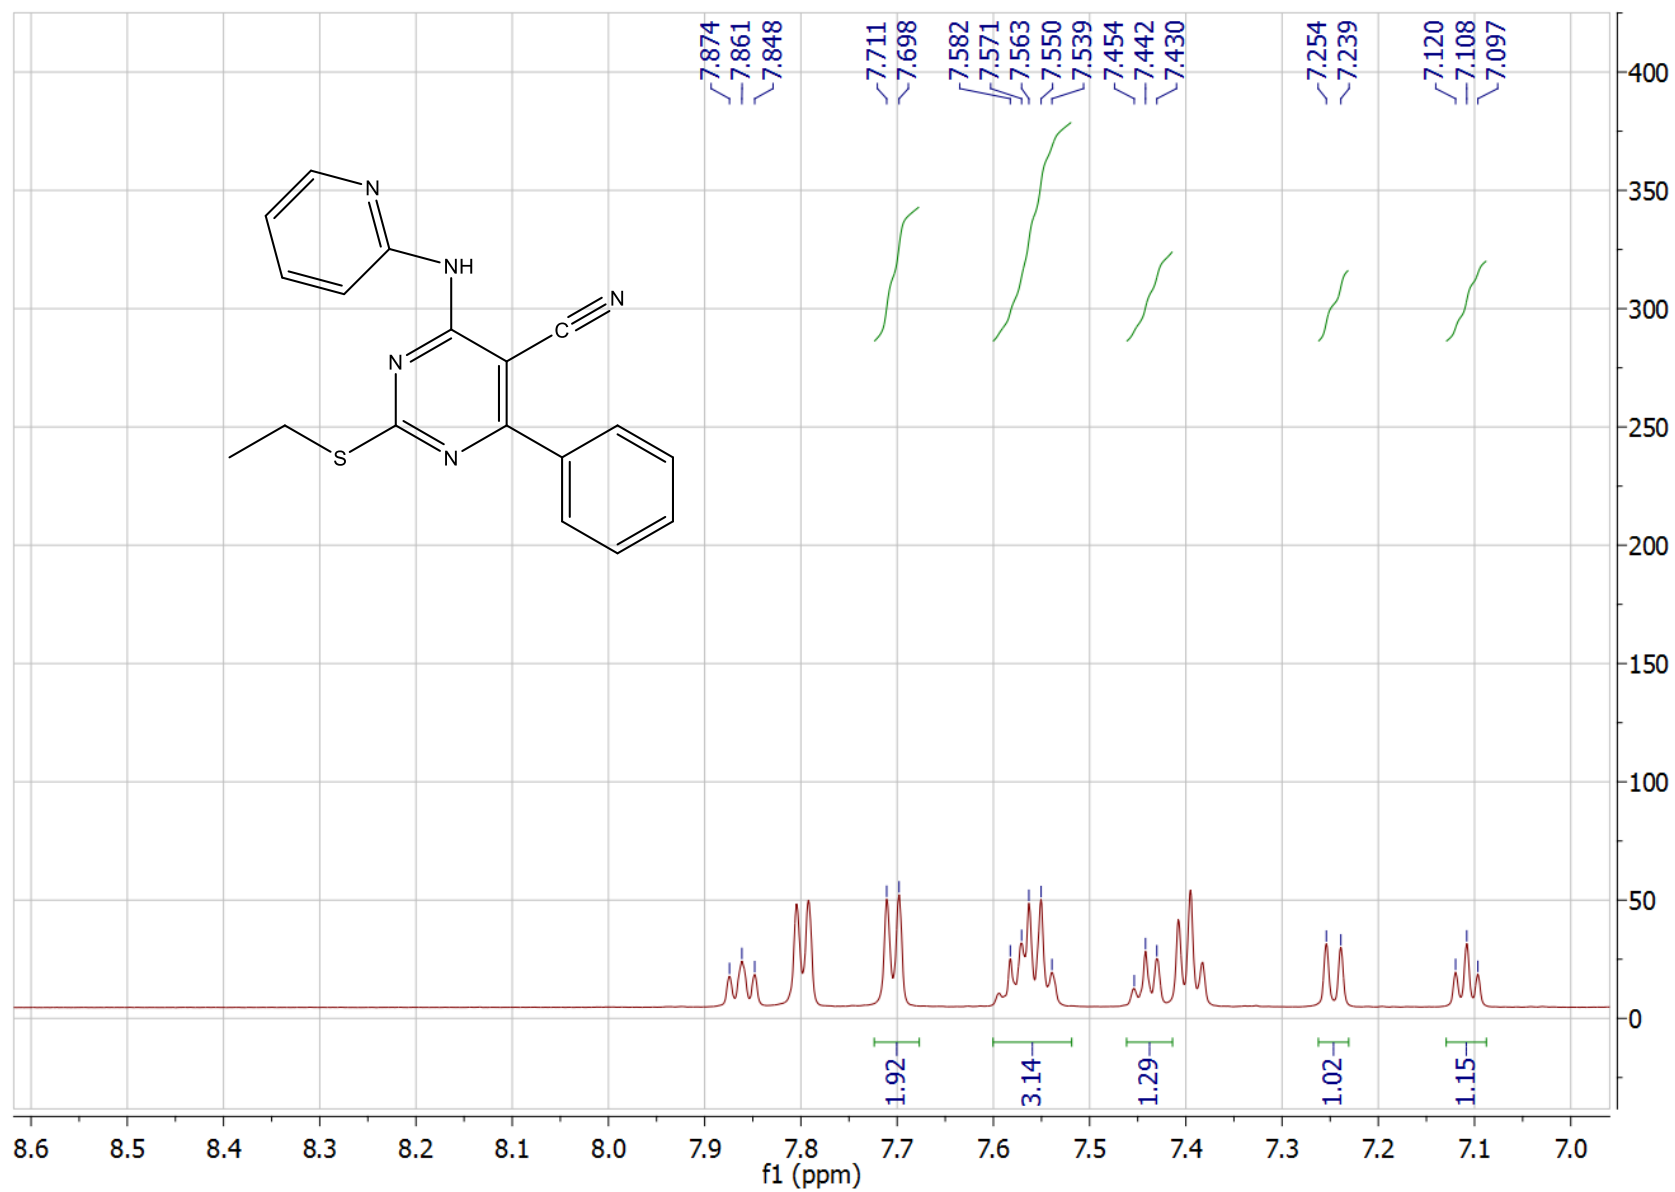

<sup>1</sup>H NMR of compound 11b

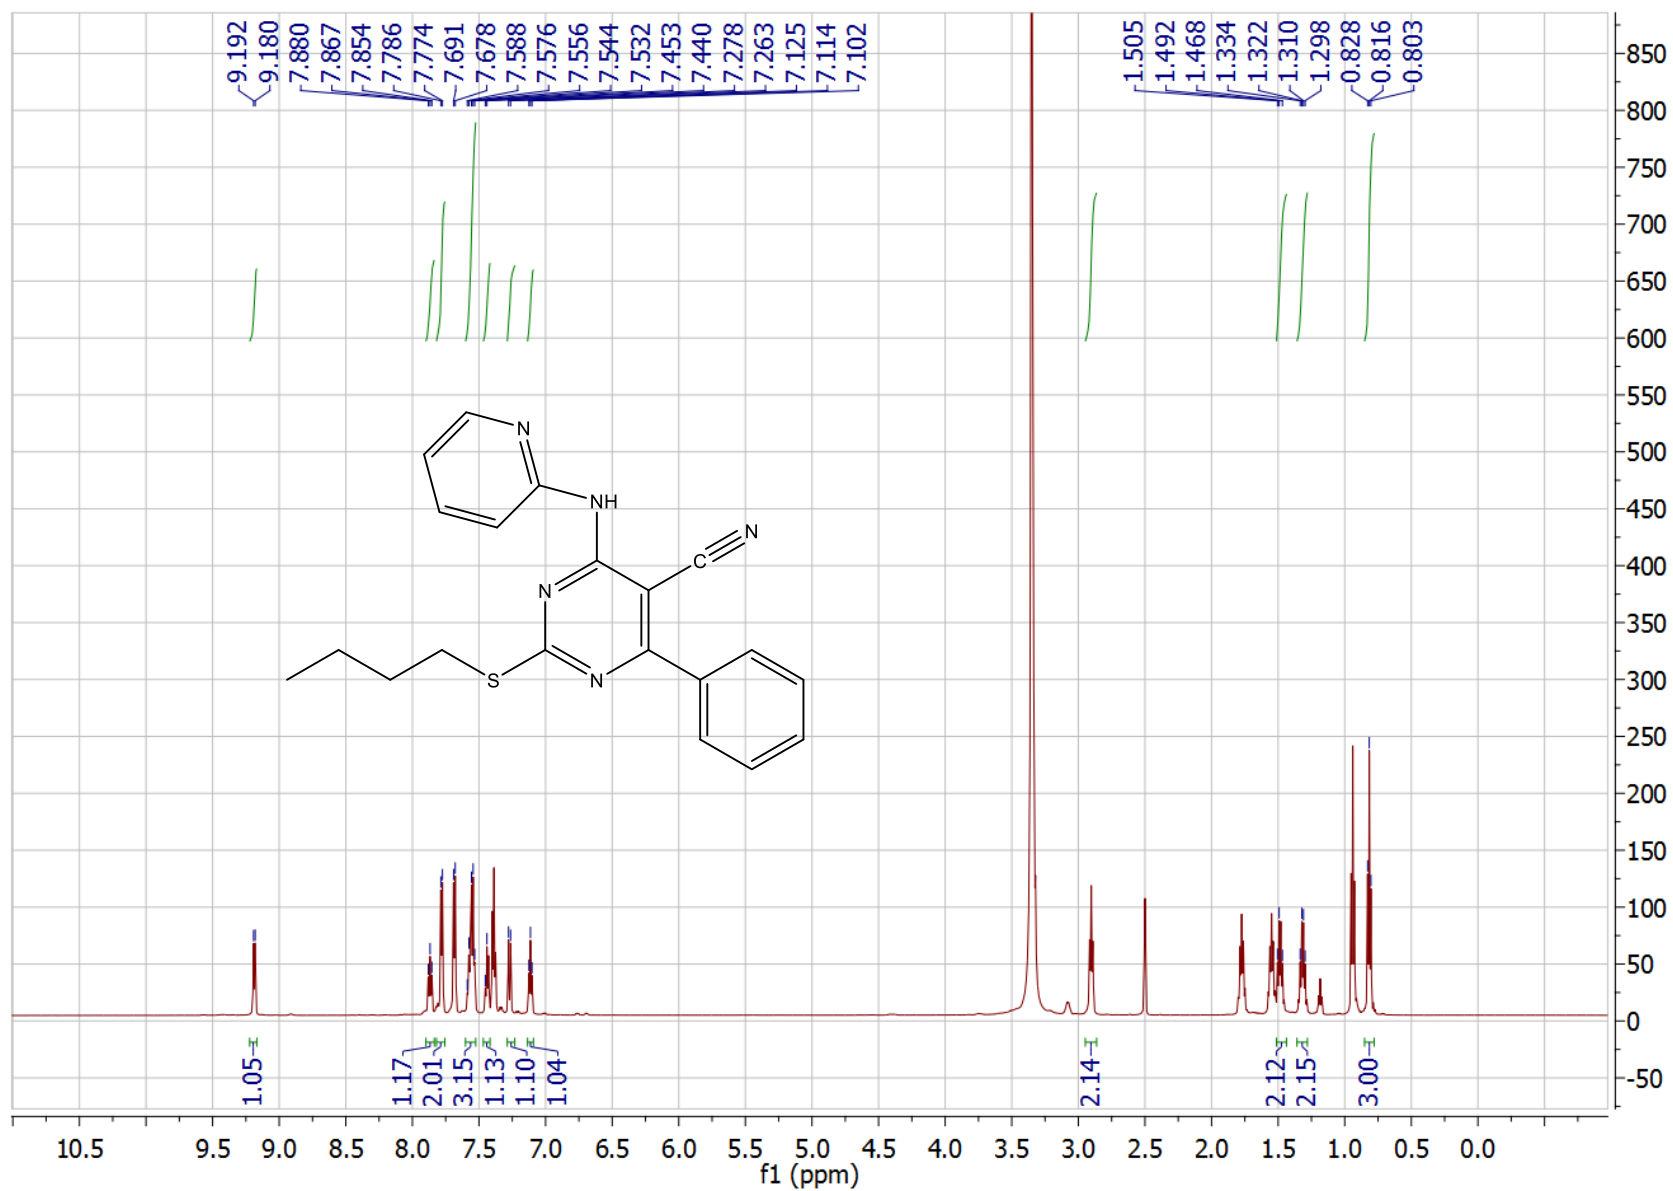

<sup>1</sup>H NMR of compound 11<sub>b</sub>

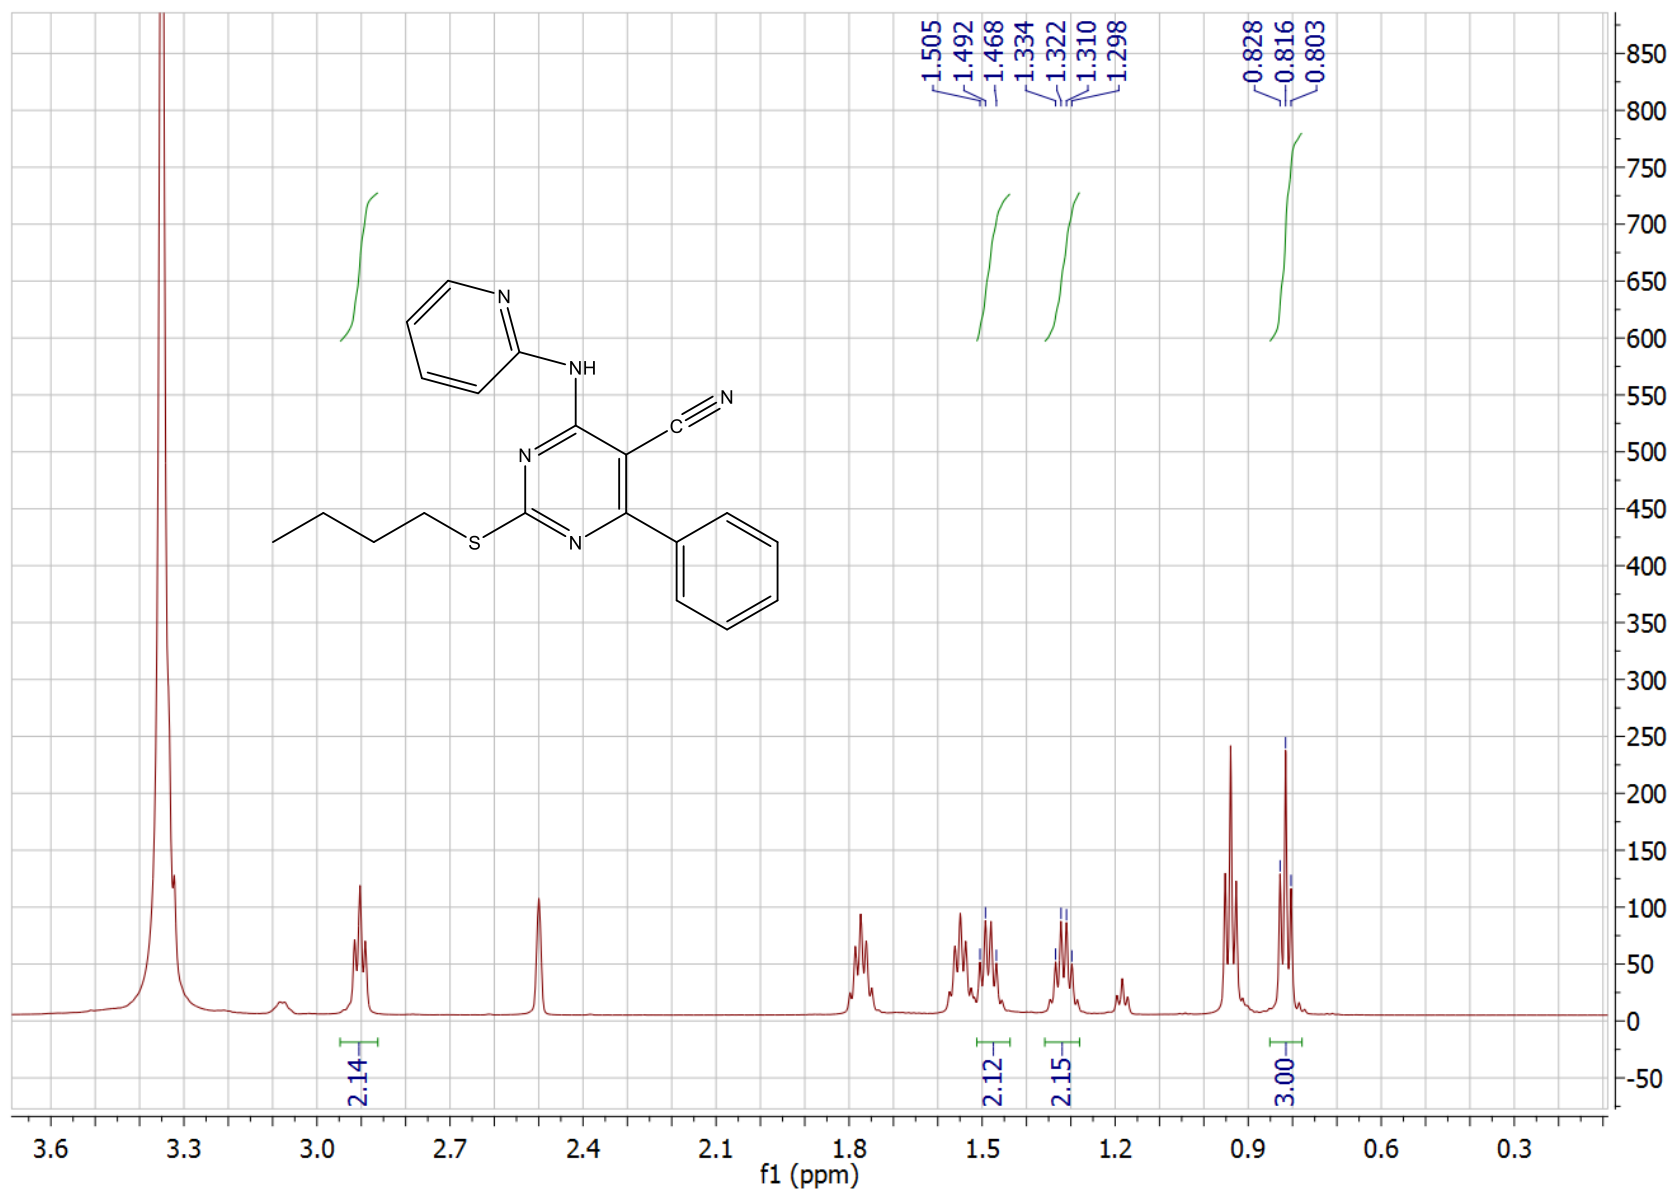



<sup>1</sup>H NMR of compound 11<sub>b</sub>

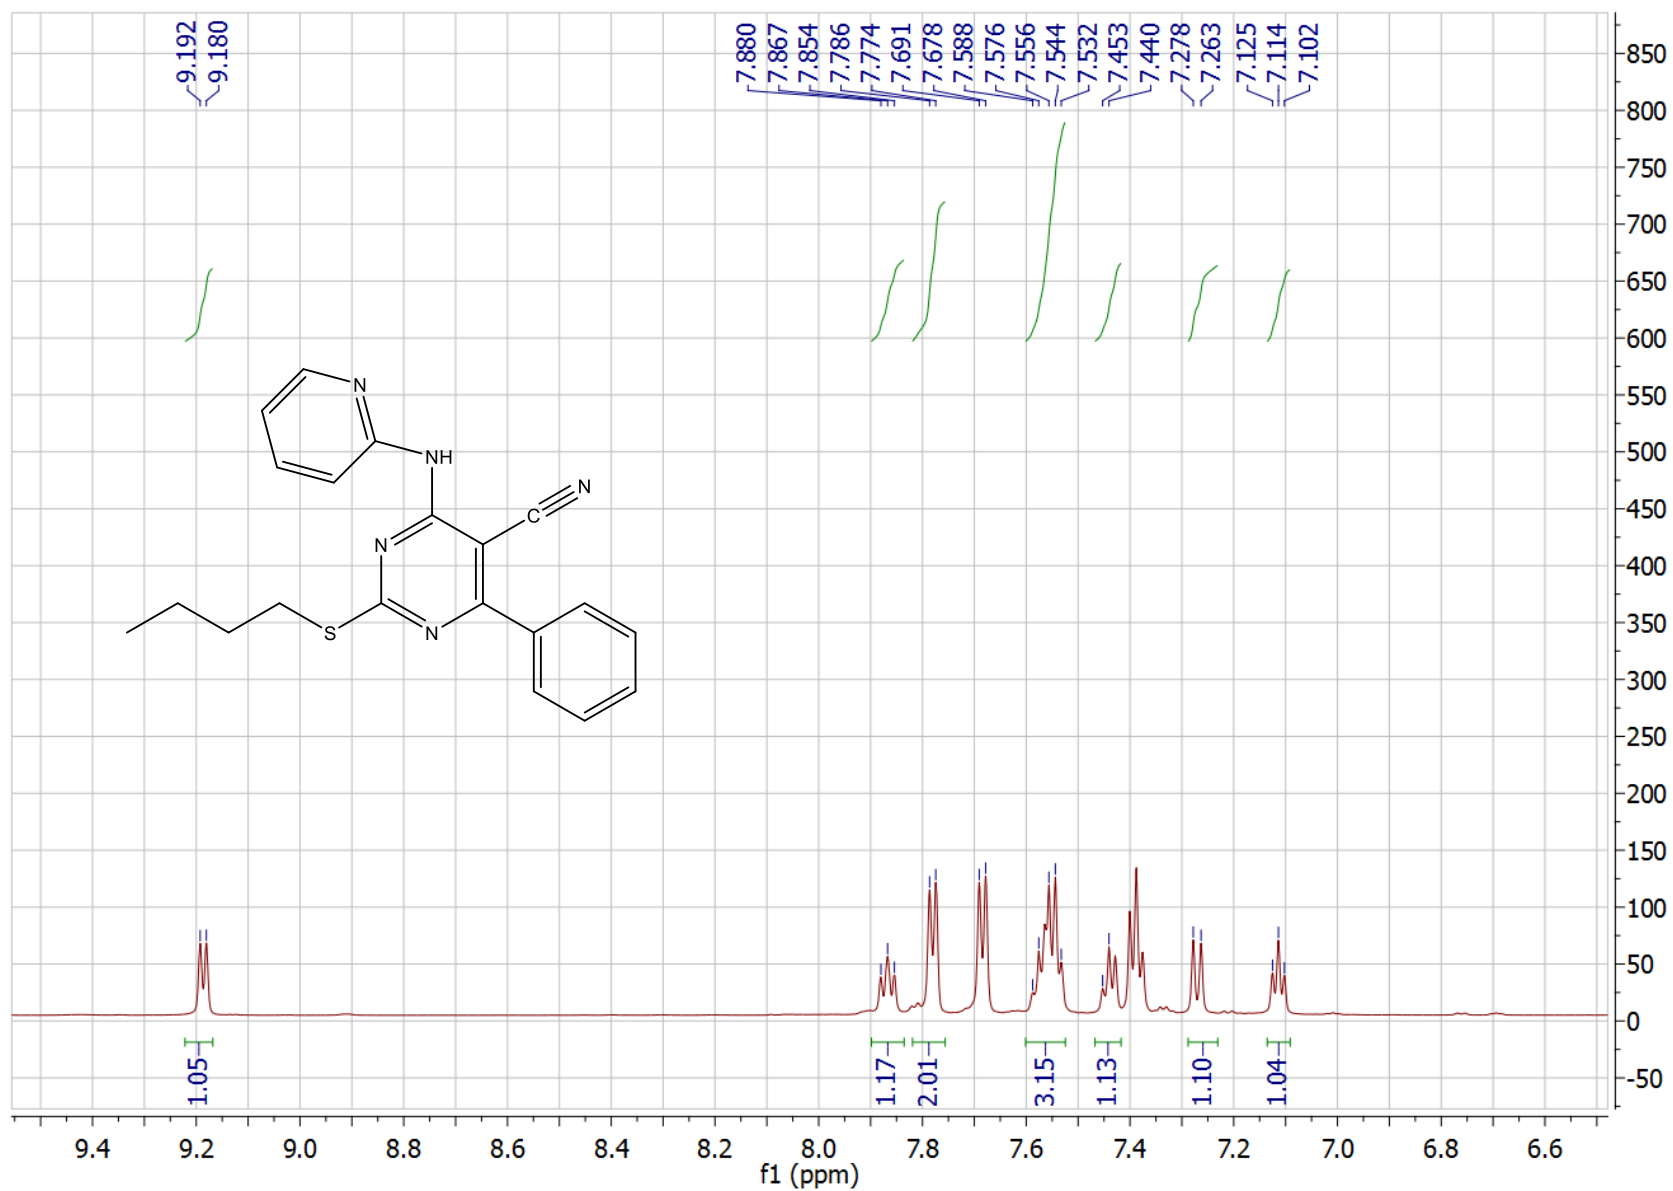

**<sup>13</sup>C NMR of compound 11<sub>b</sub>**

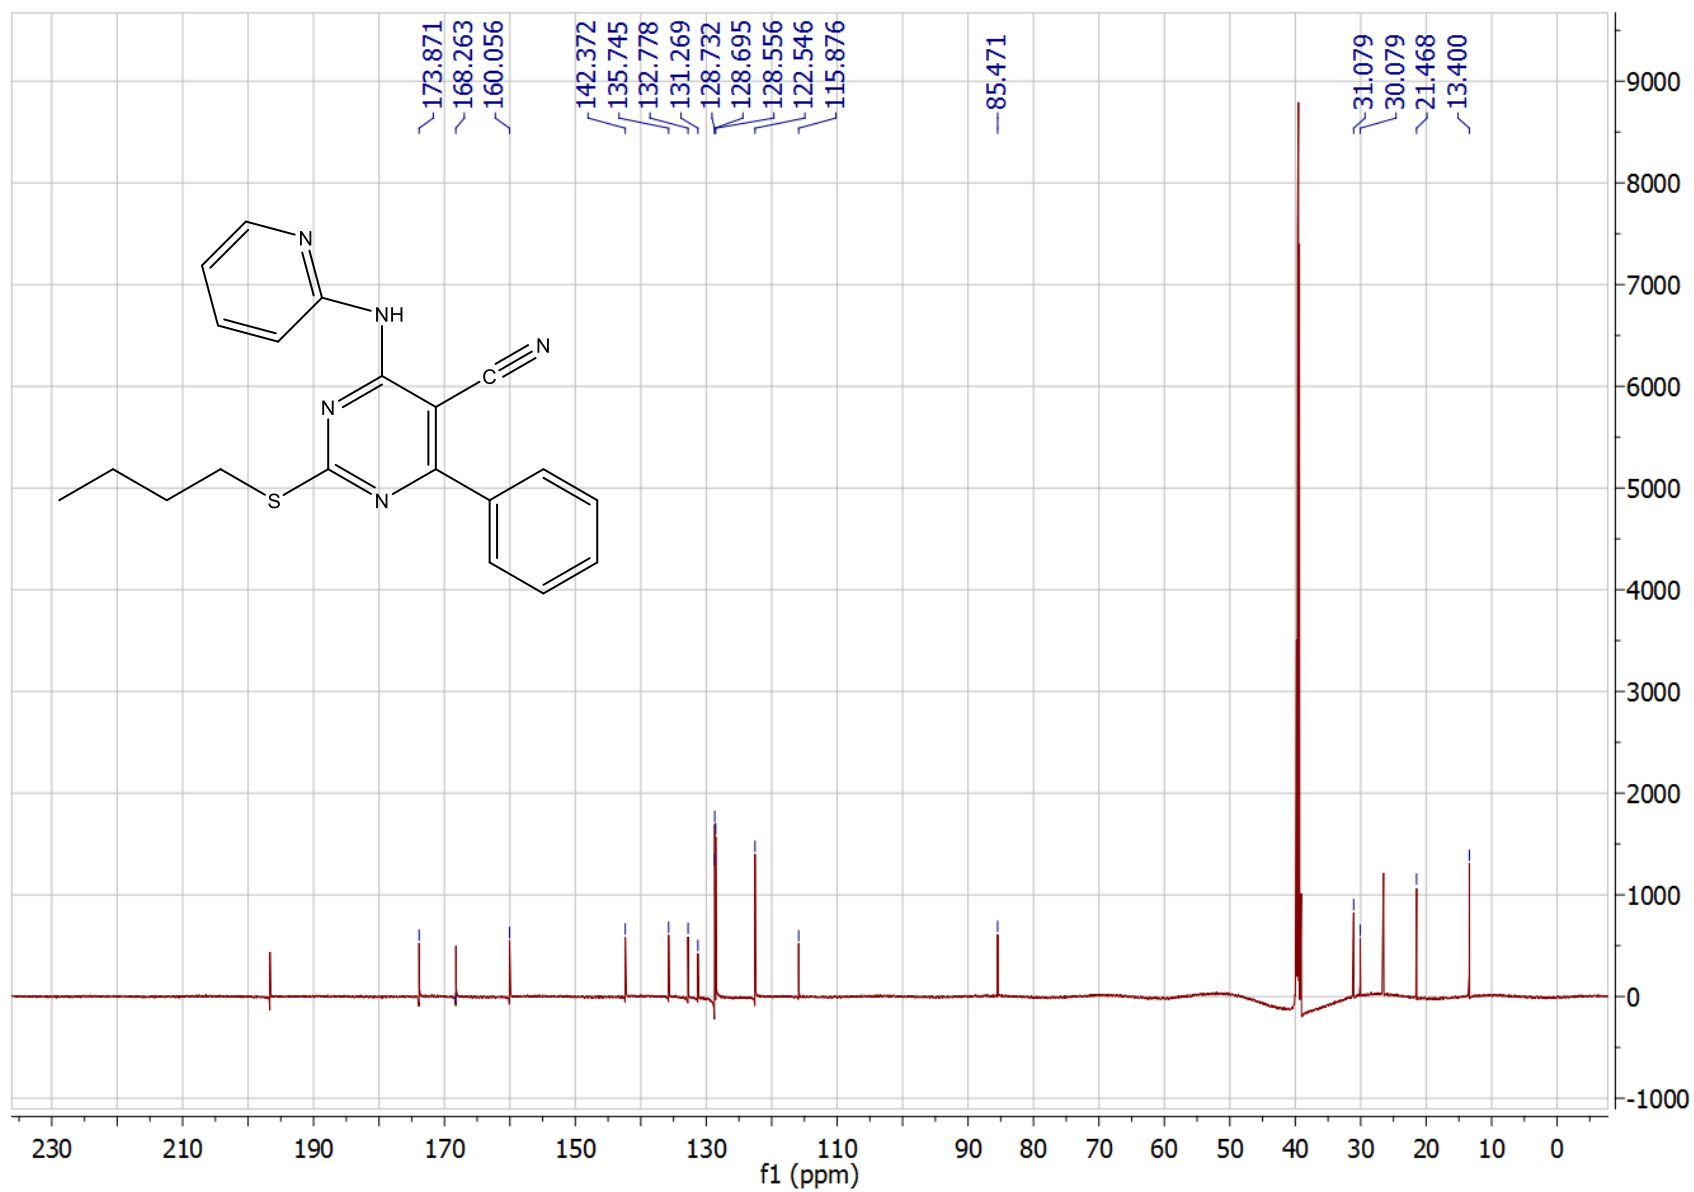

<sup>13</sup>C NMR of compound 11b

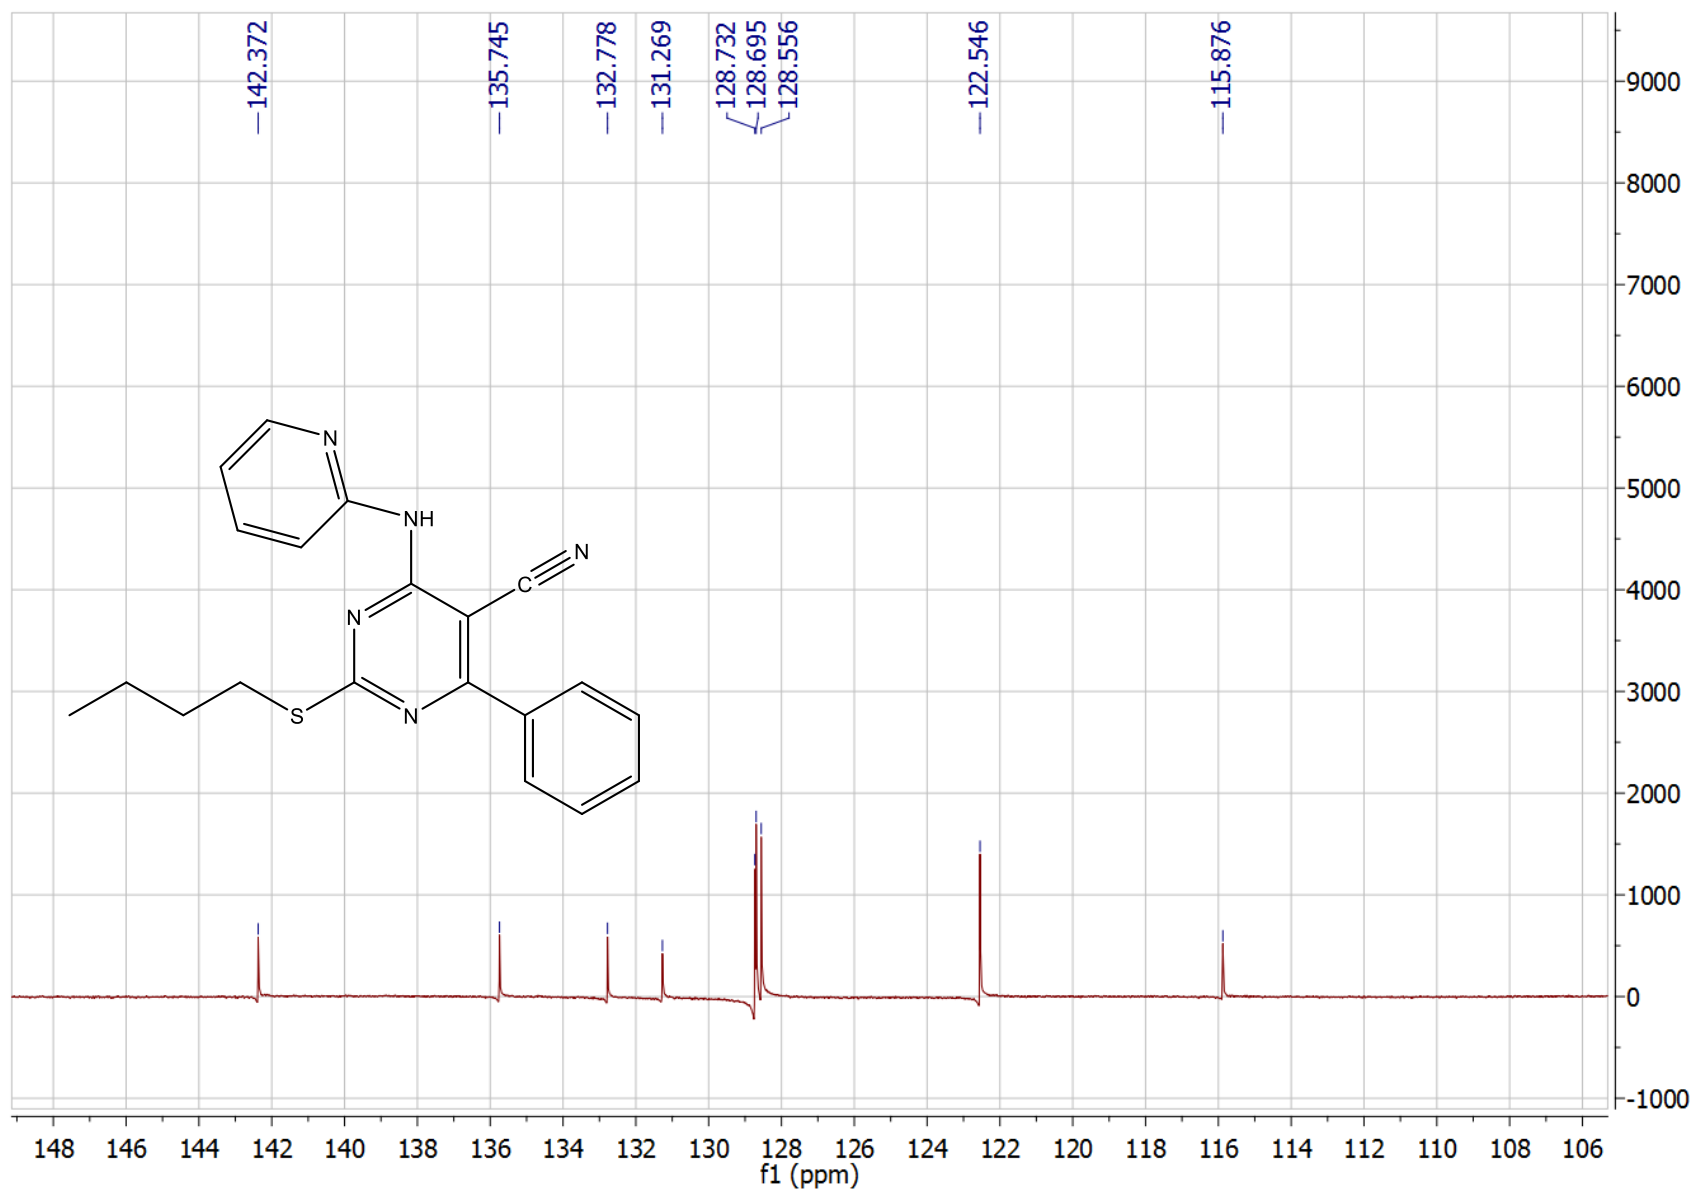

APT of compound 11<sub>b</sub>

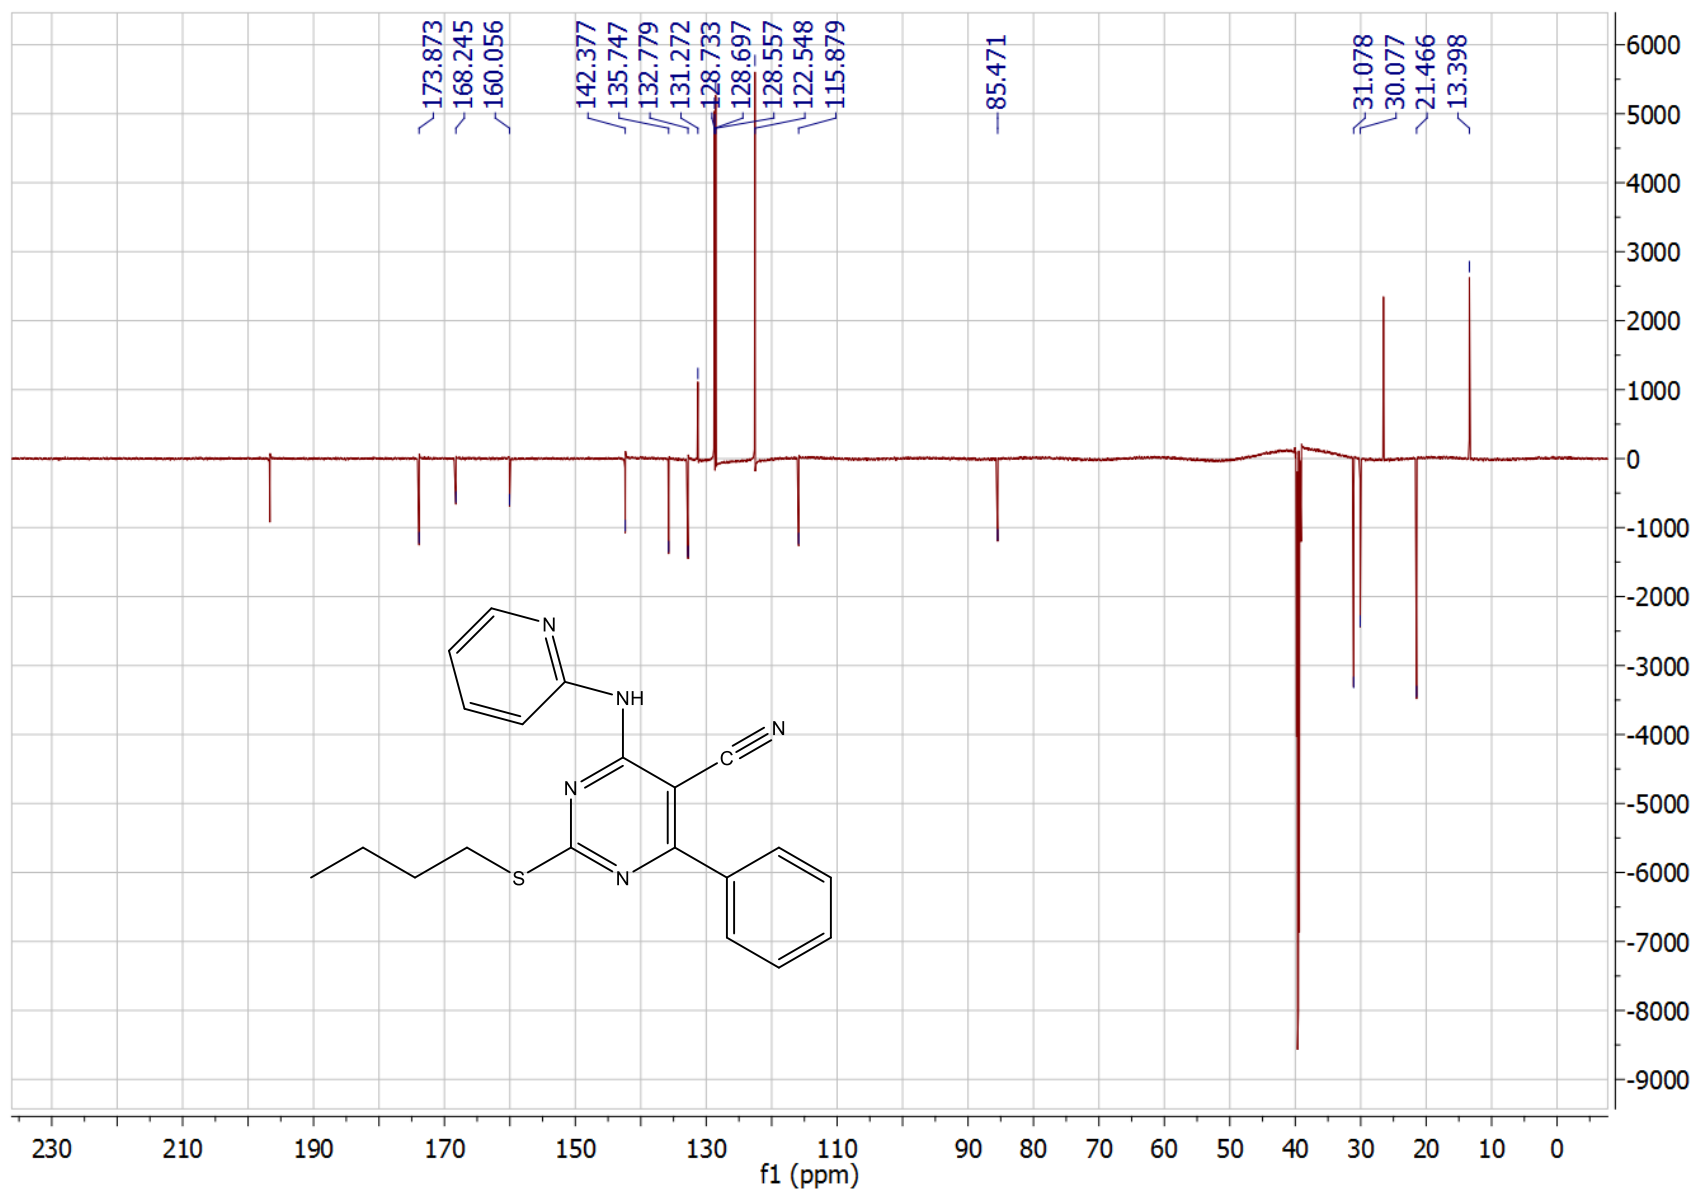

APT of compound 11<sub>b</sub>

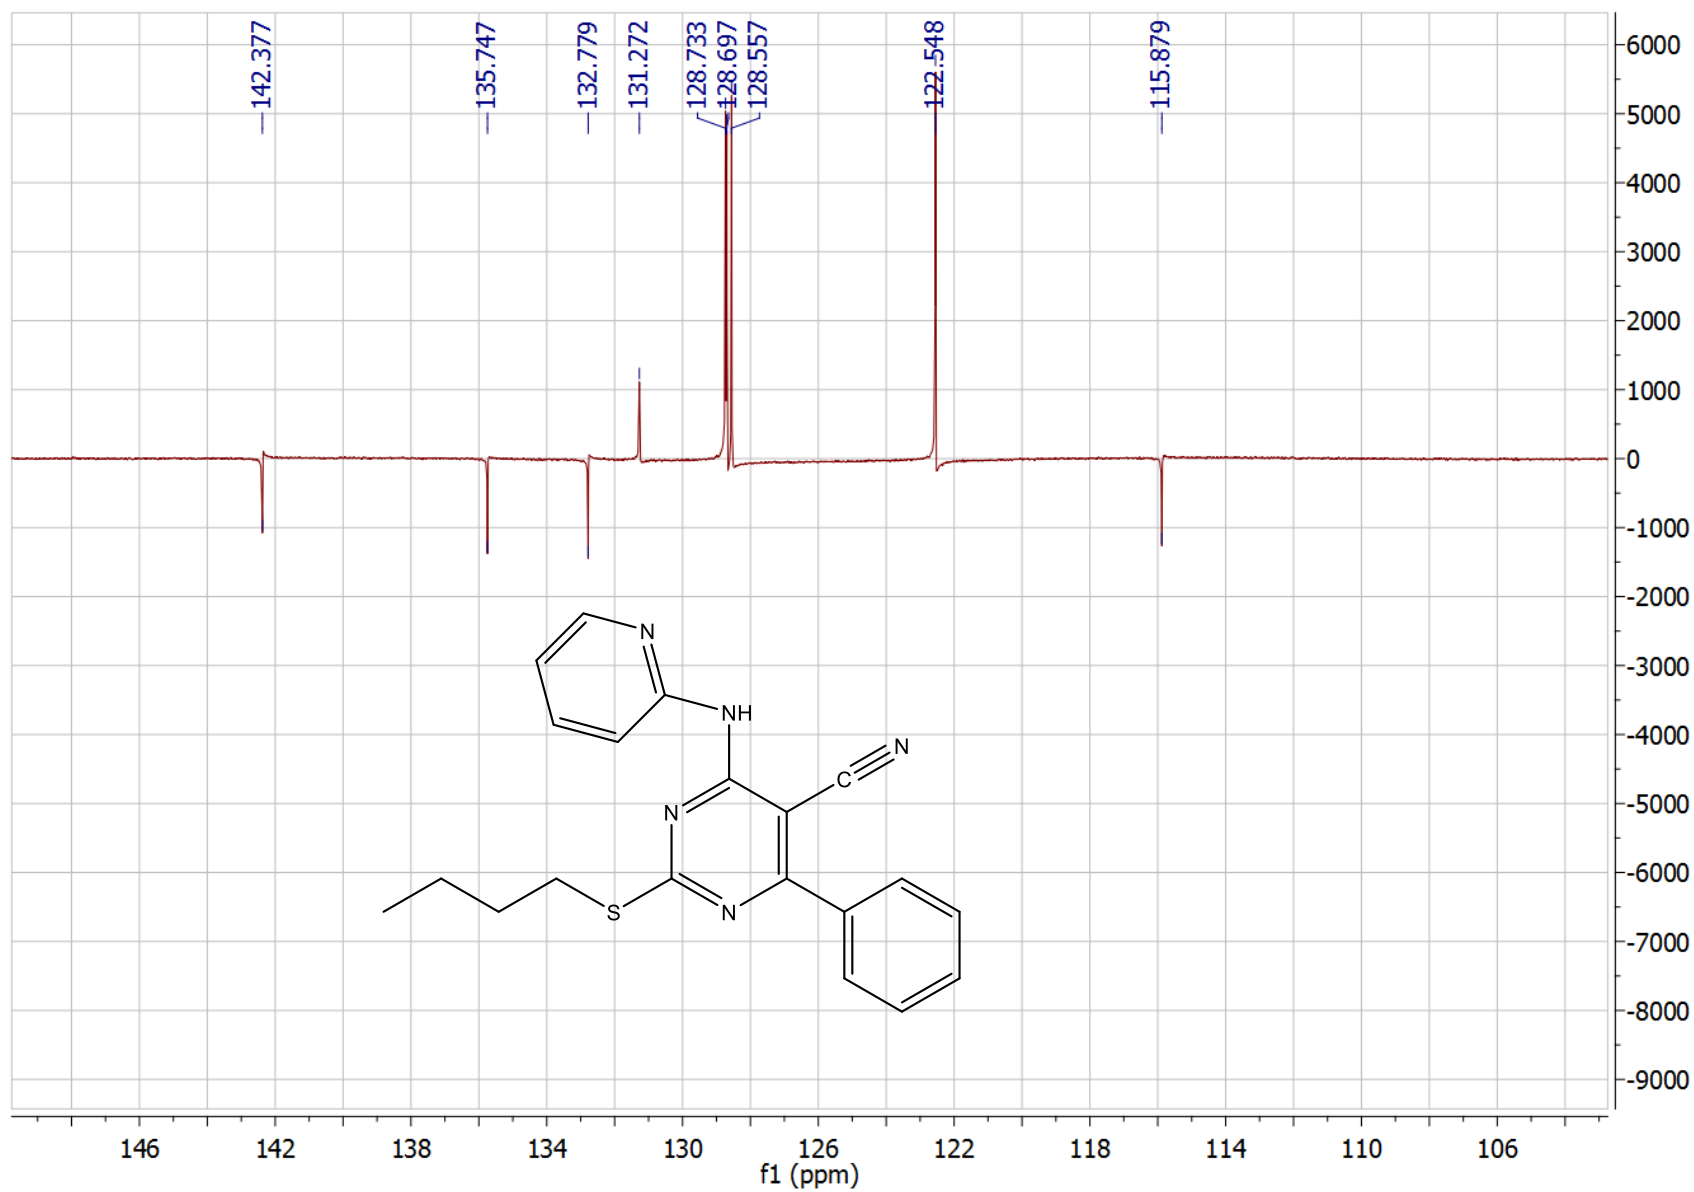

<sup>1</sup>H NMR of compound 12<sub>a</sub>

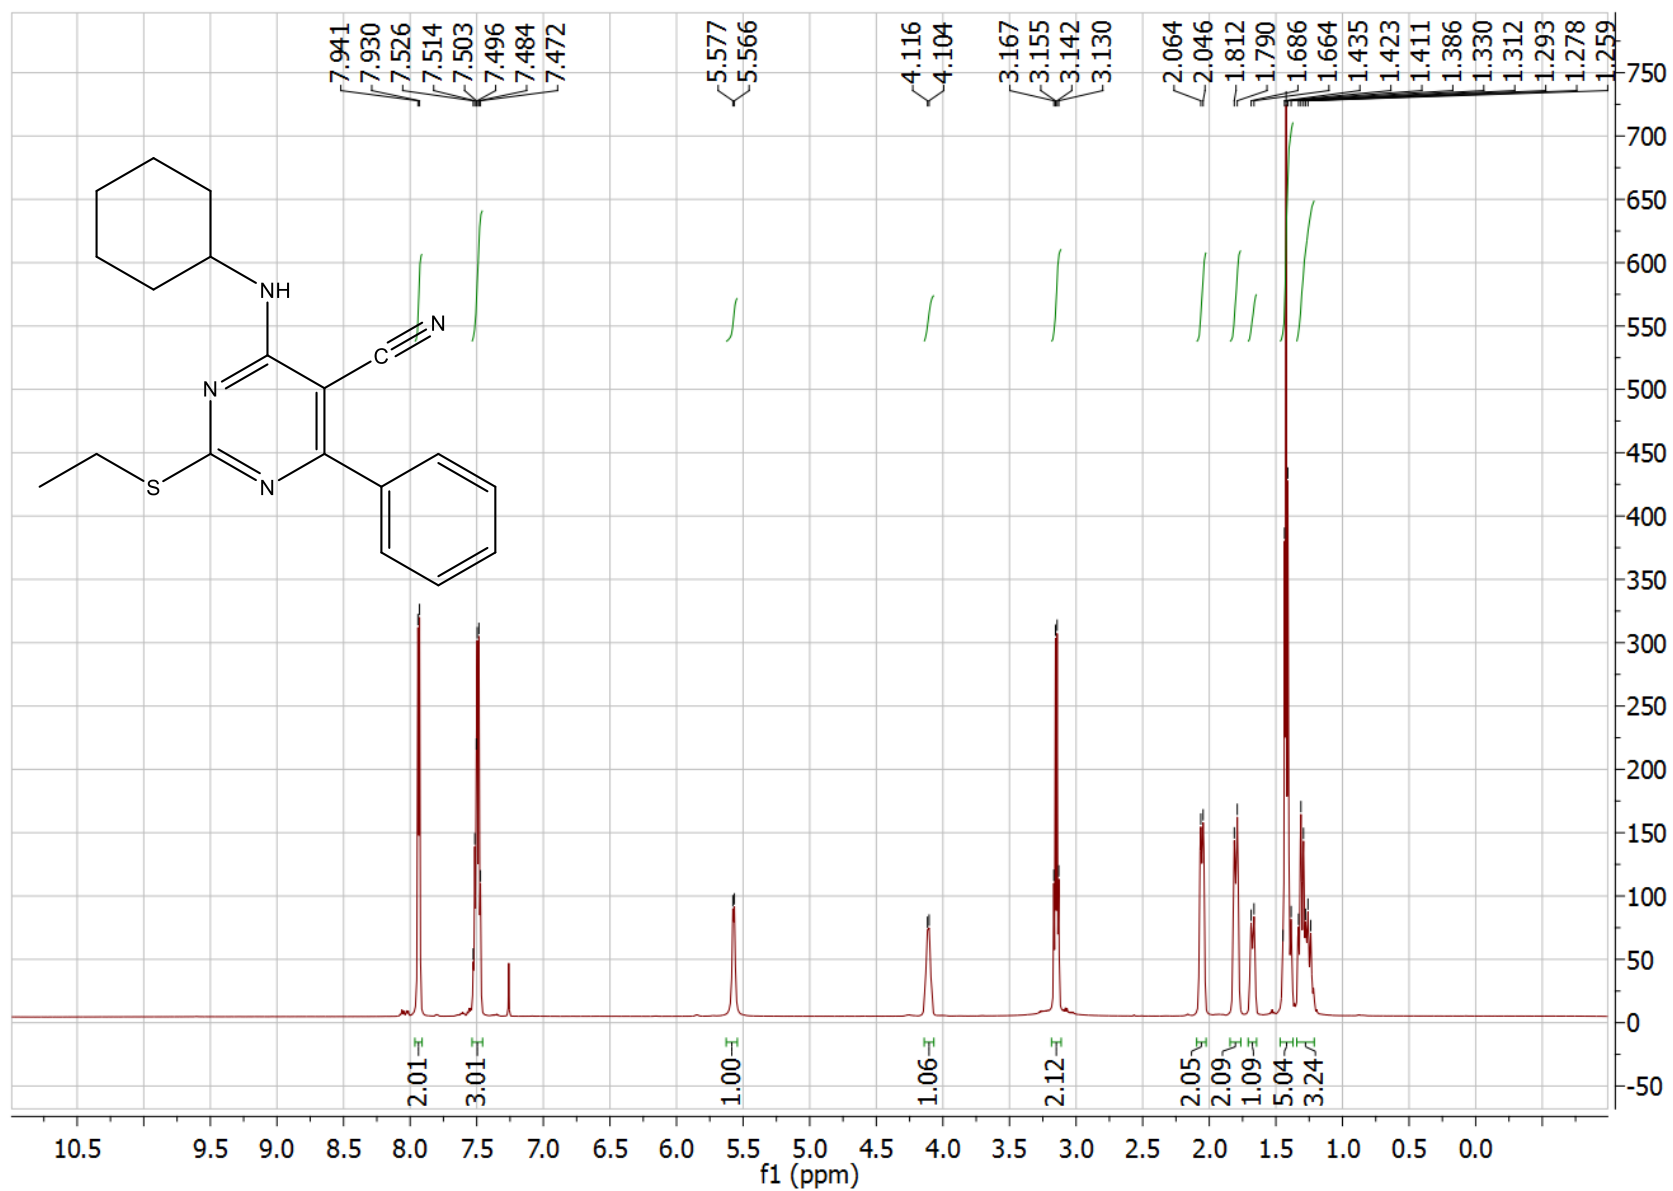

<sup>1</sup>H NMR of compound 12<sub>a</sub>

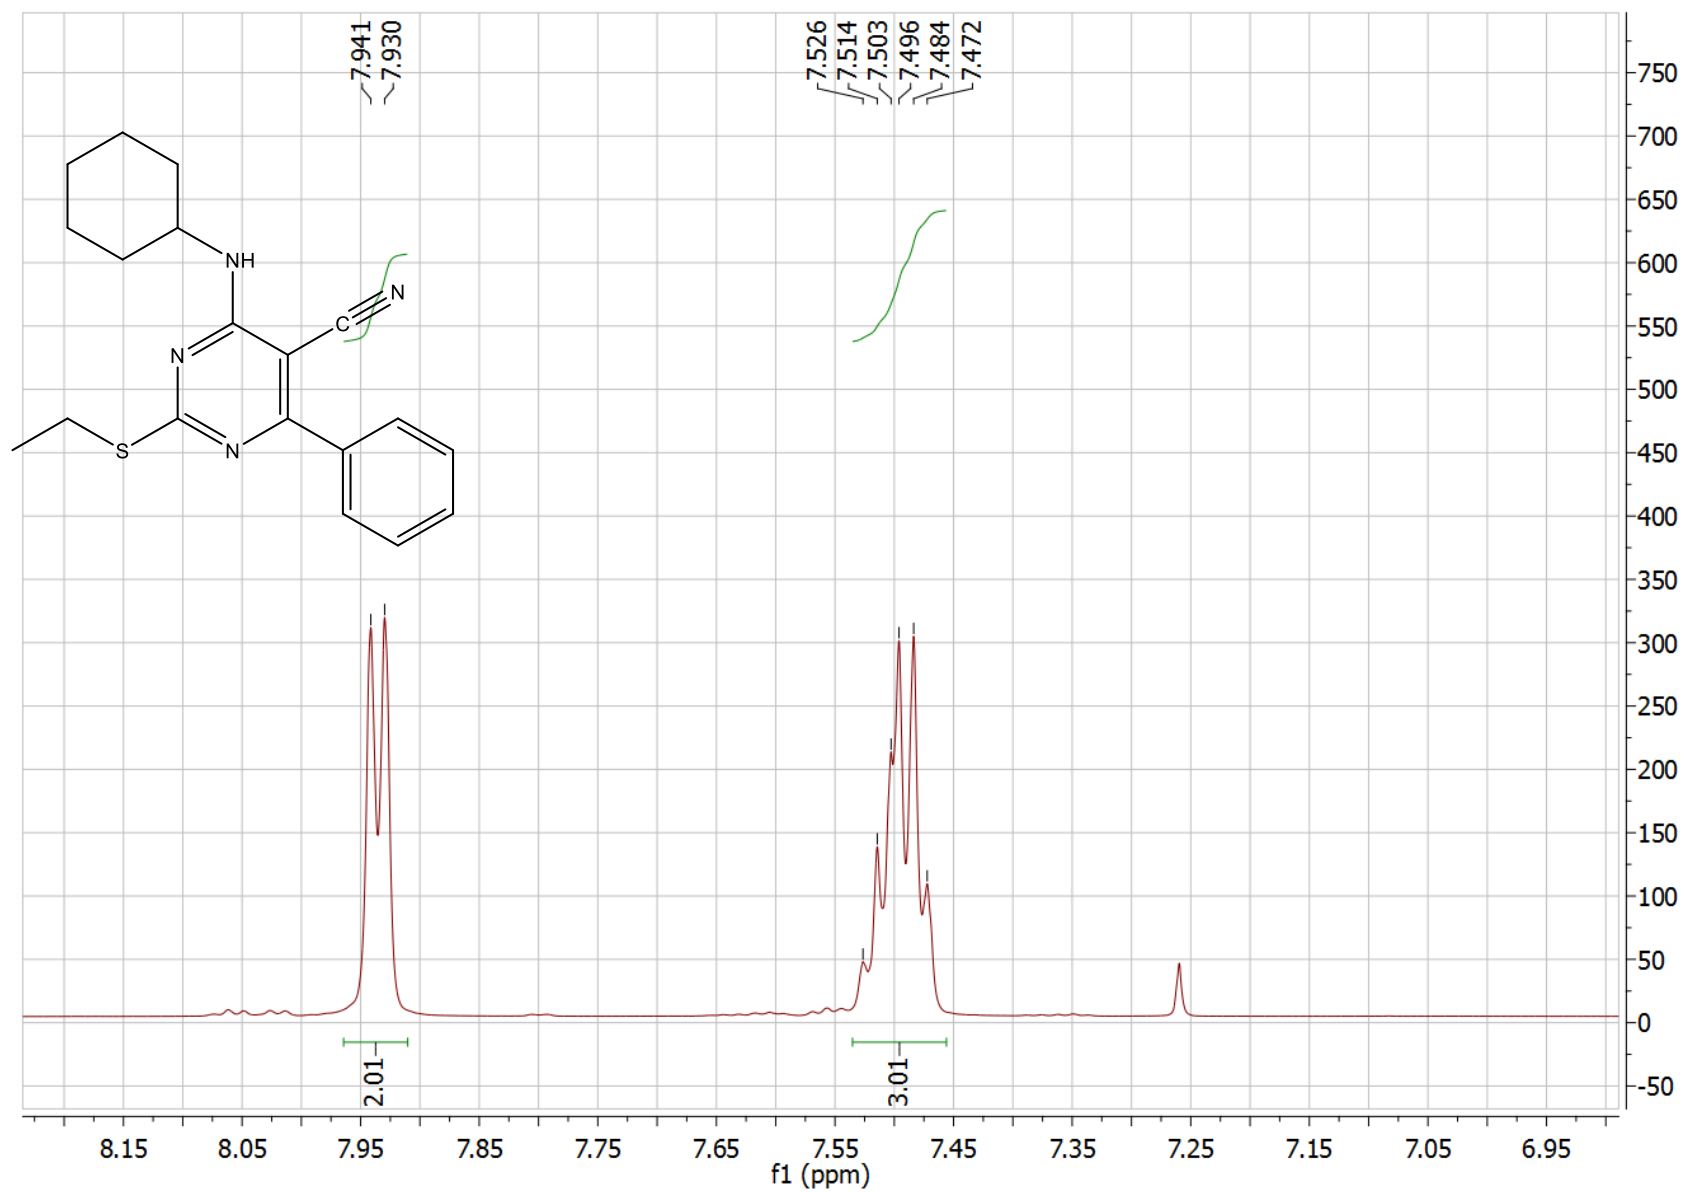

<sup>1</sup>H NMR of compound 12<sub>a</sub>

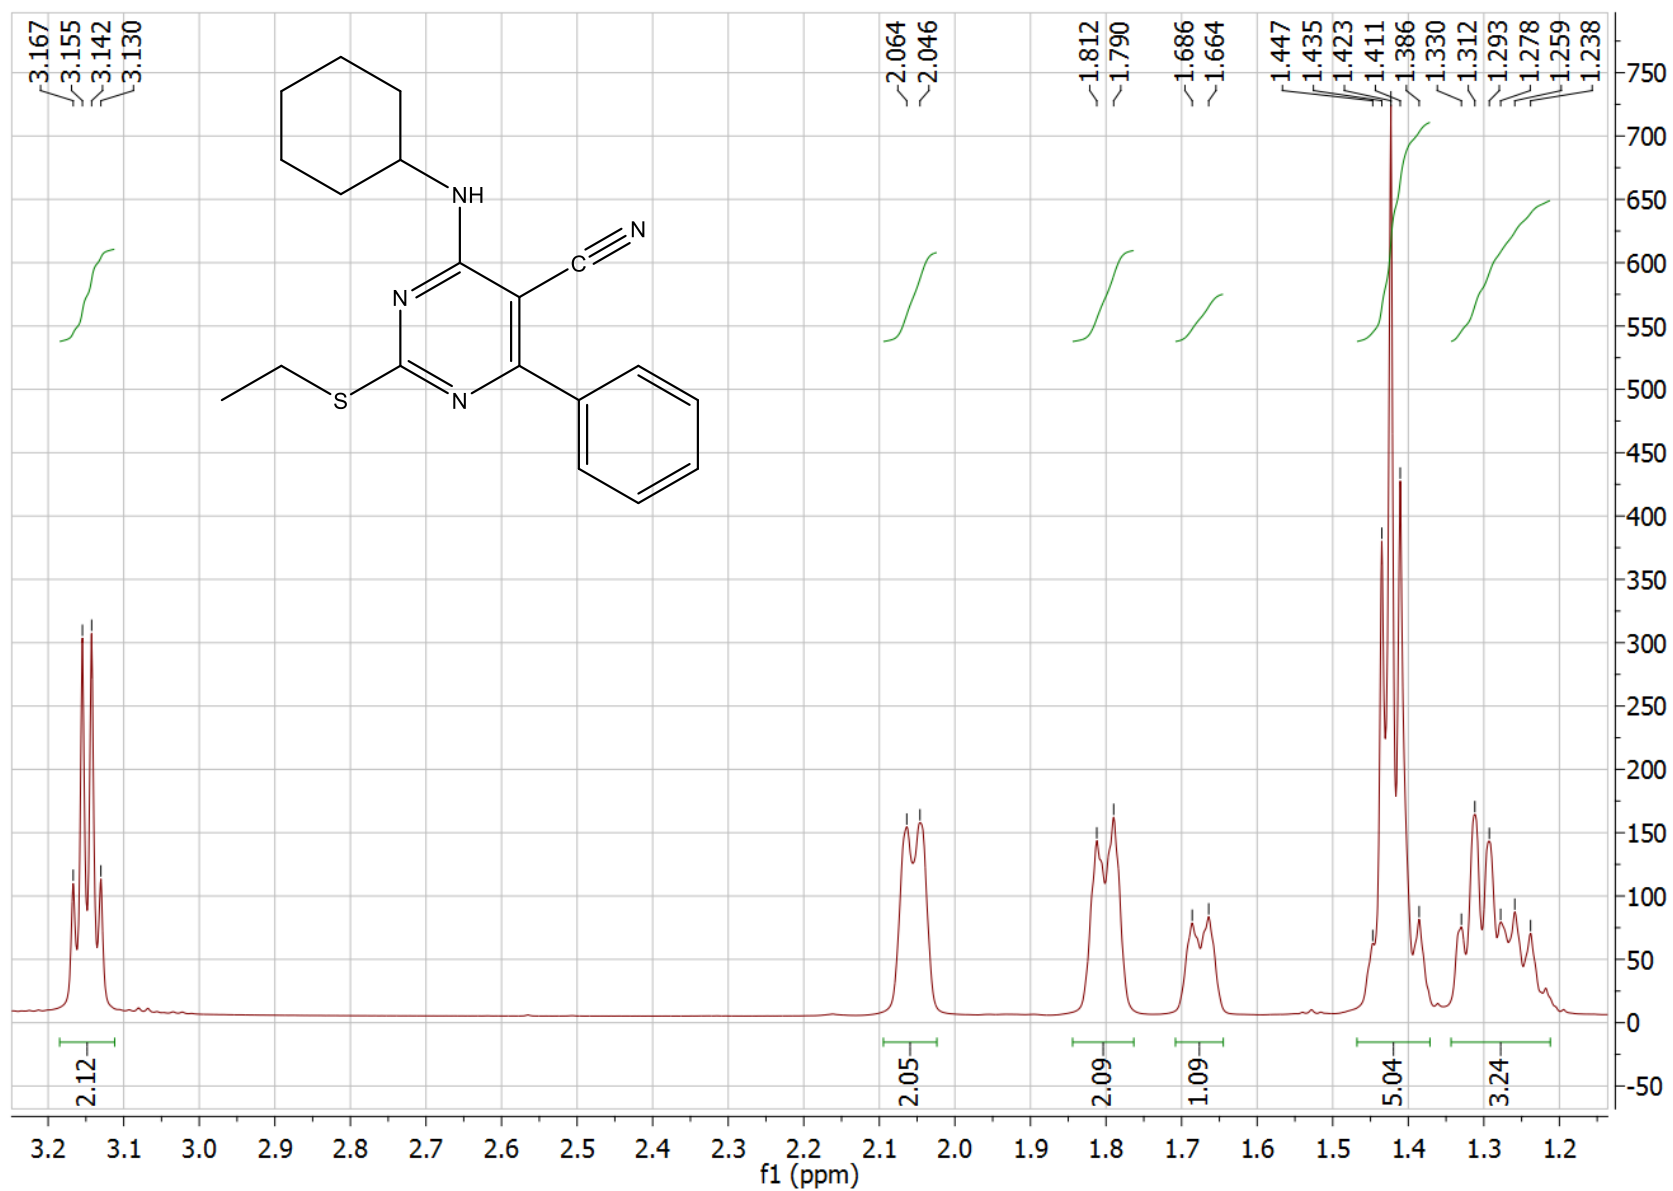



<sup>13</sup>C NMR of compound 12<sub>a</sub>

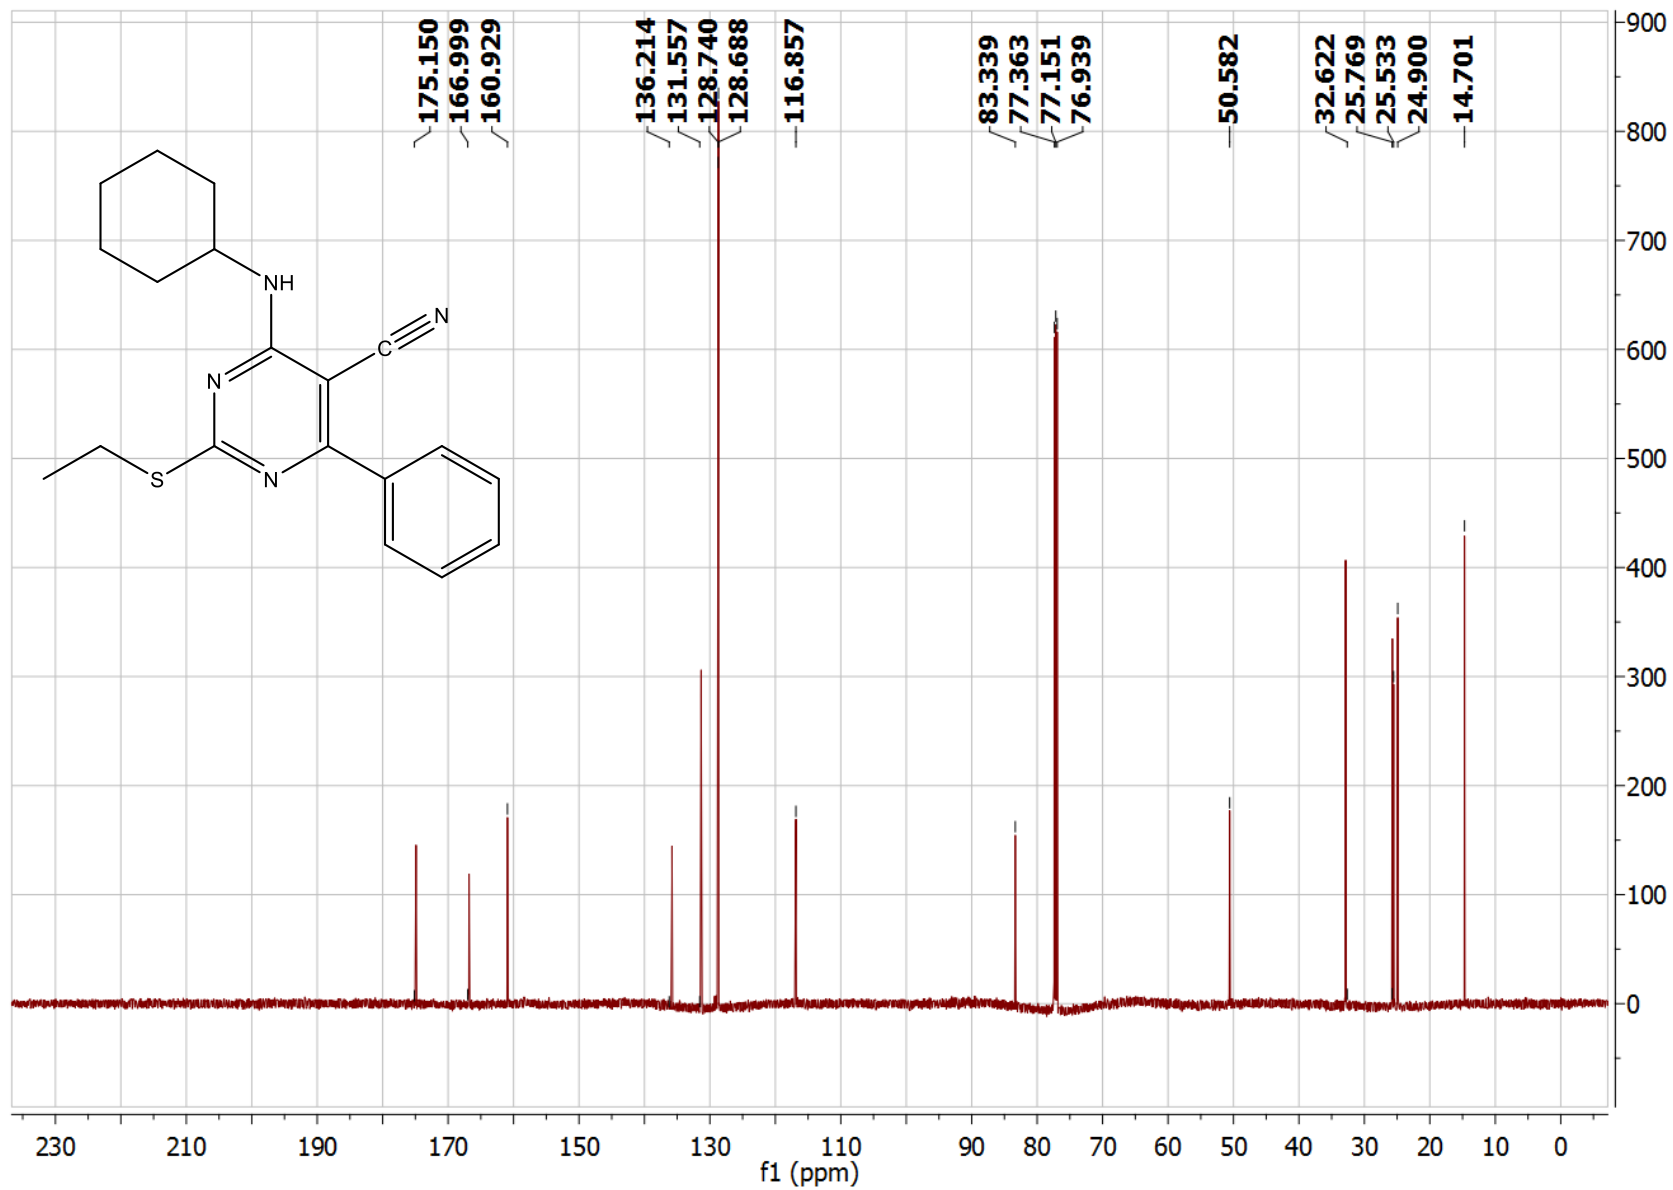

<sup>13</sup>C NMR of compound 12<sub>a</sub>

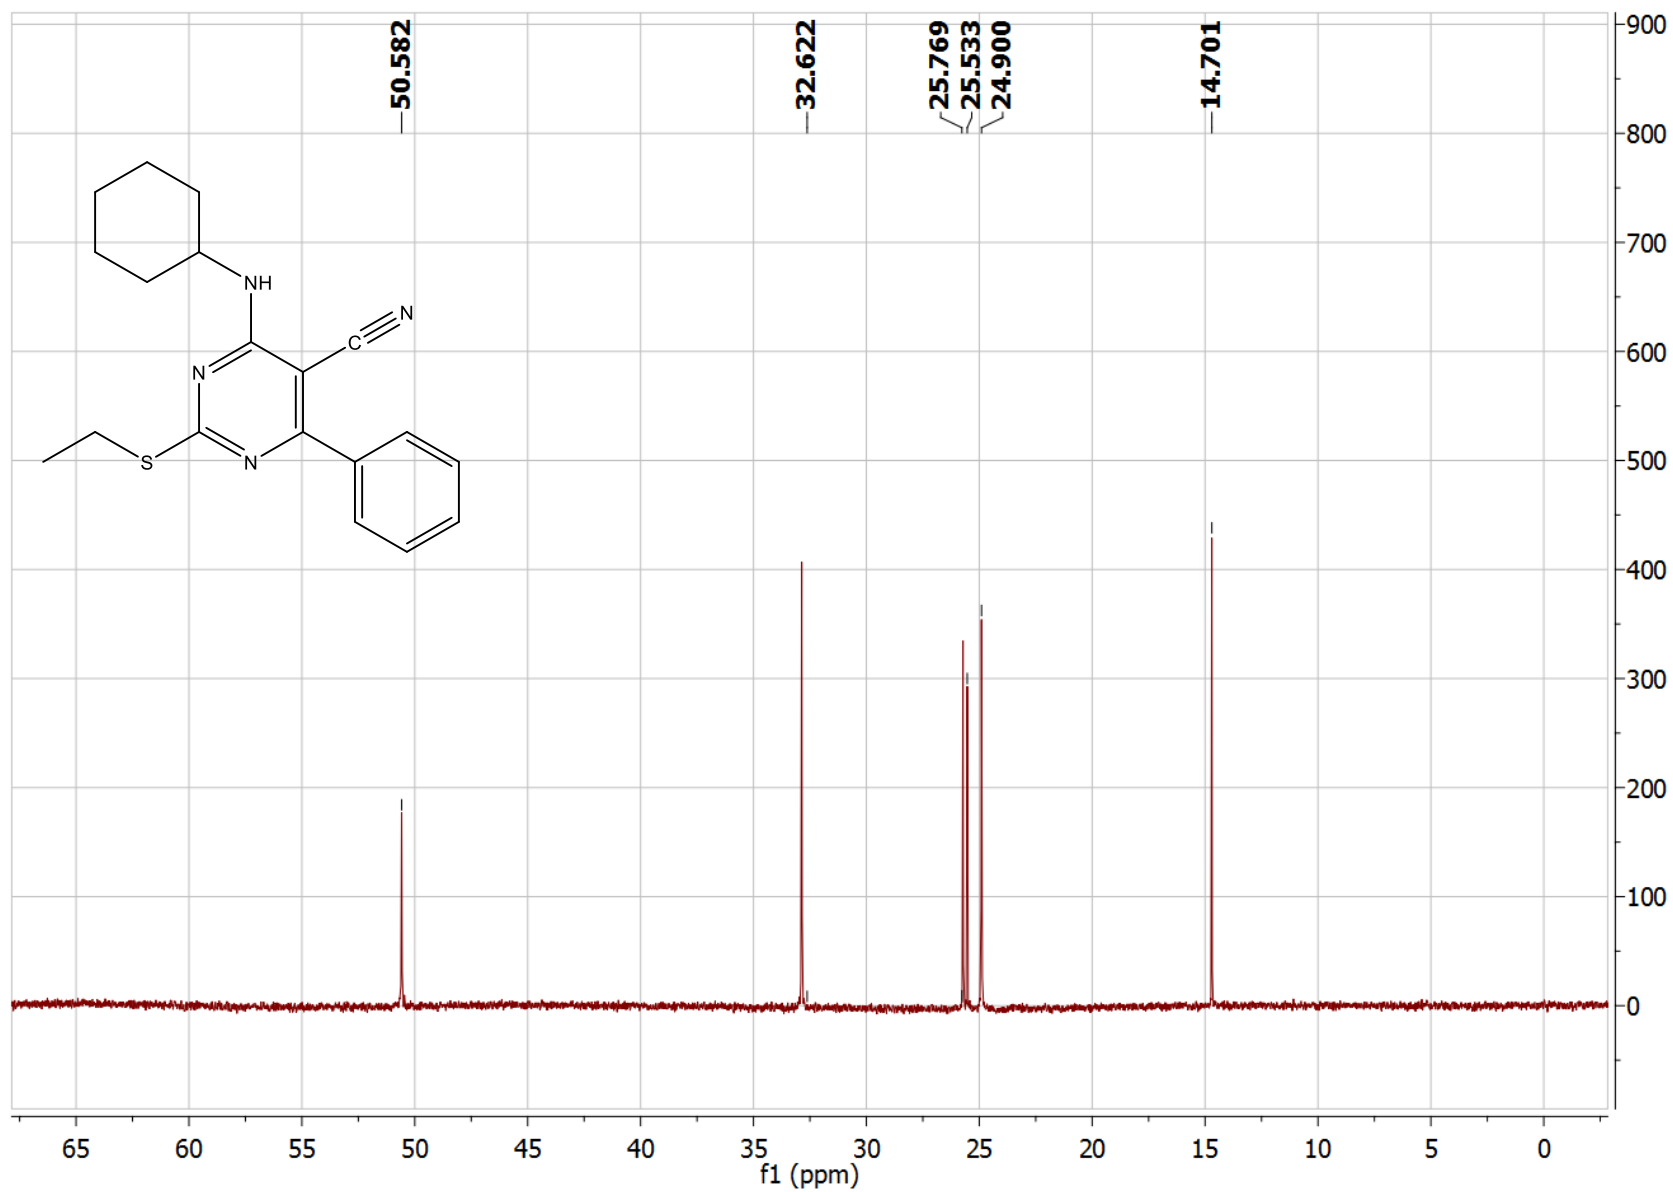

<sup>13</sup>C NMR of compound 12<sub>a</sub>

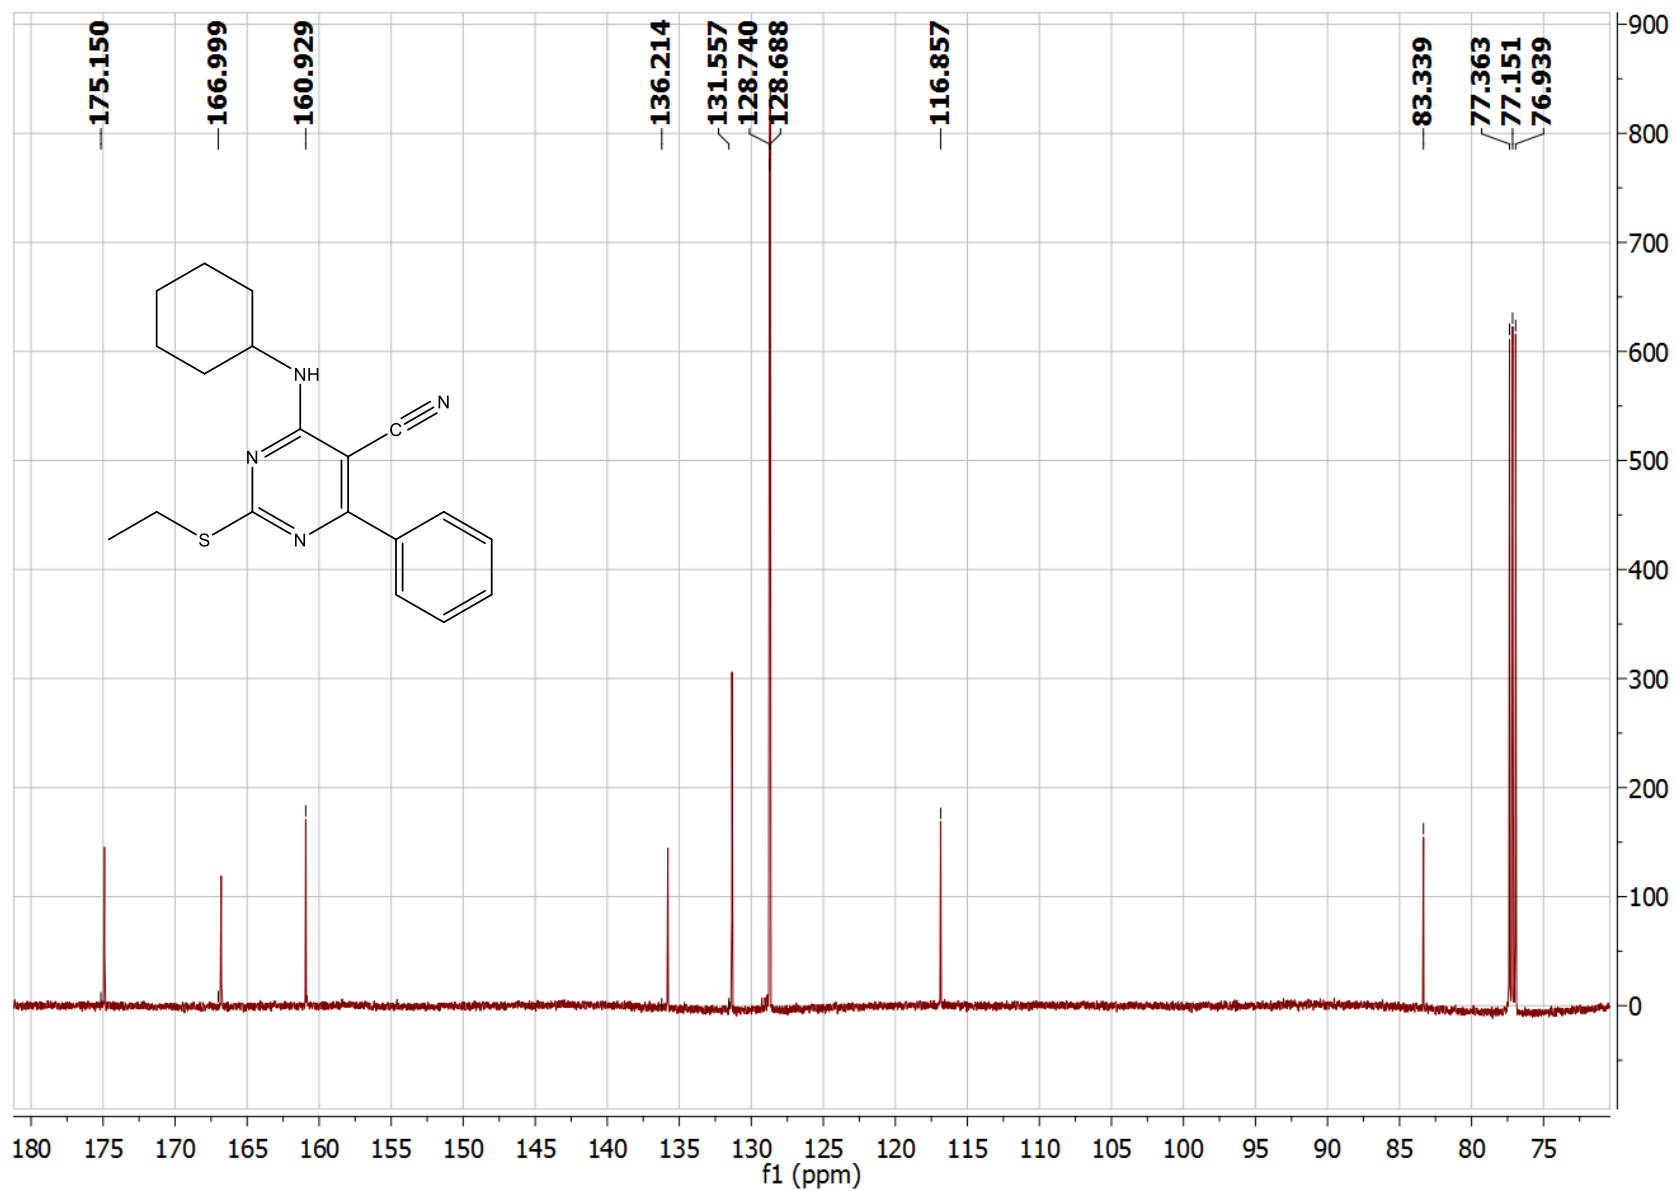

APT of compound 12<sub>a</sub>

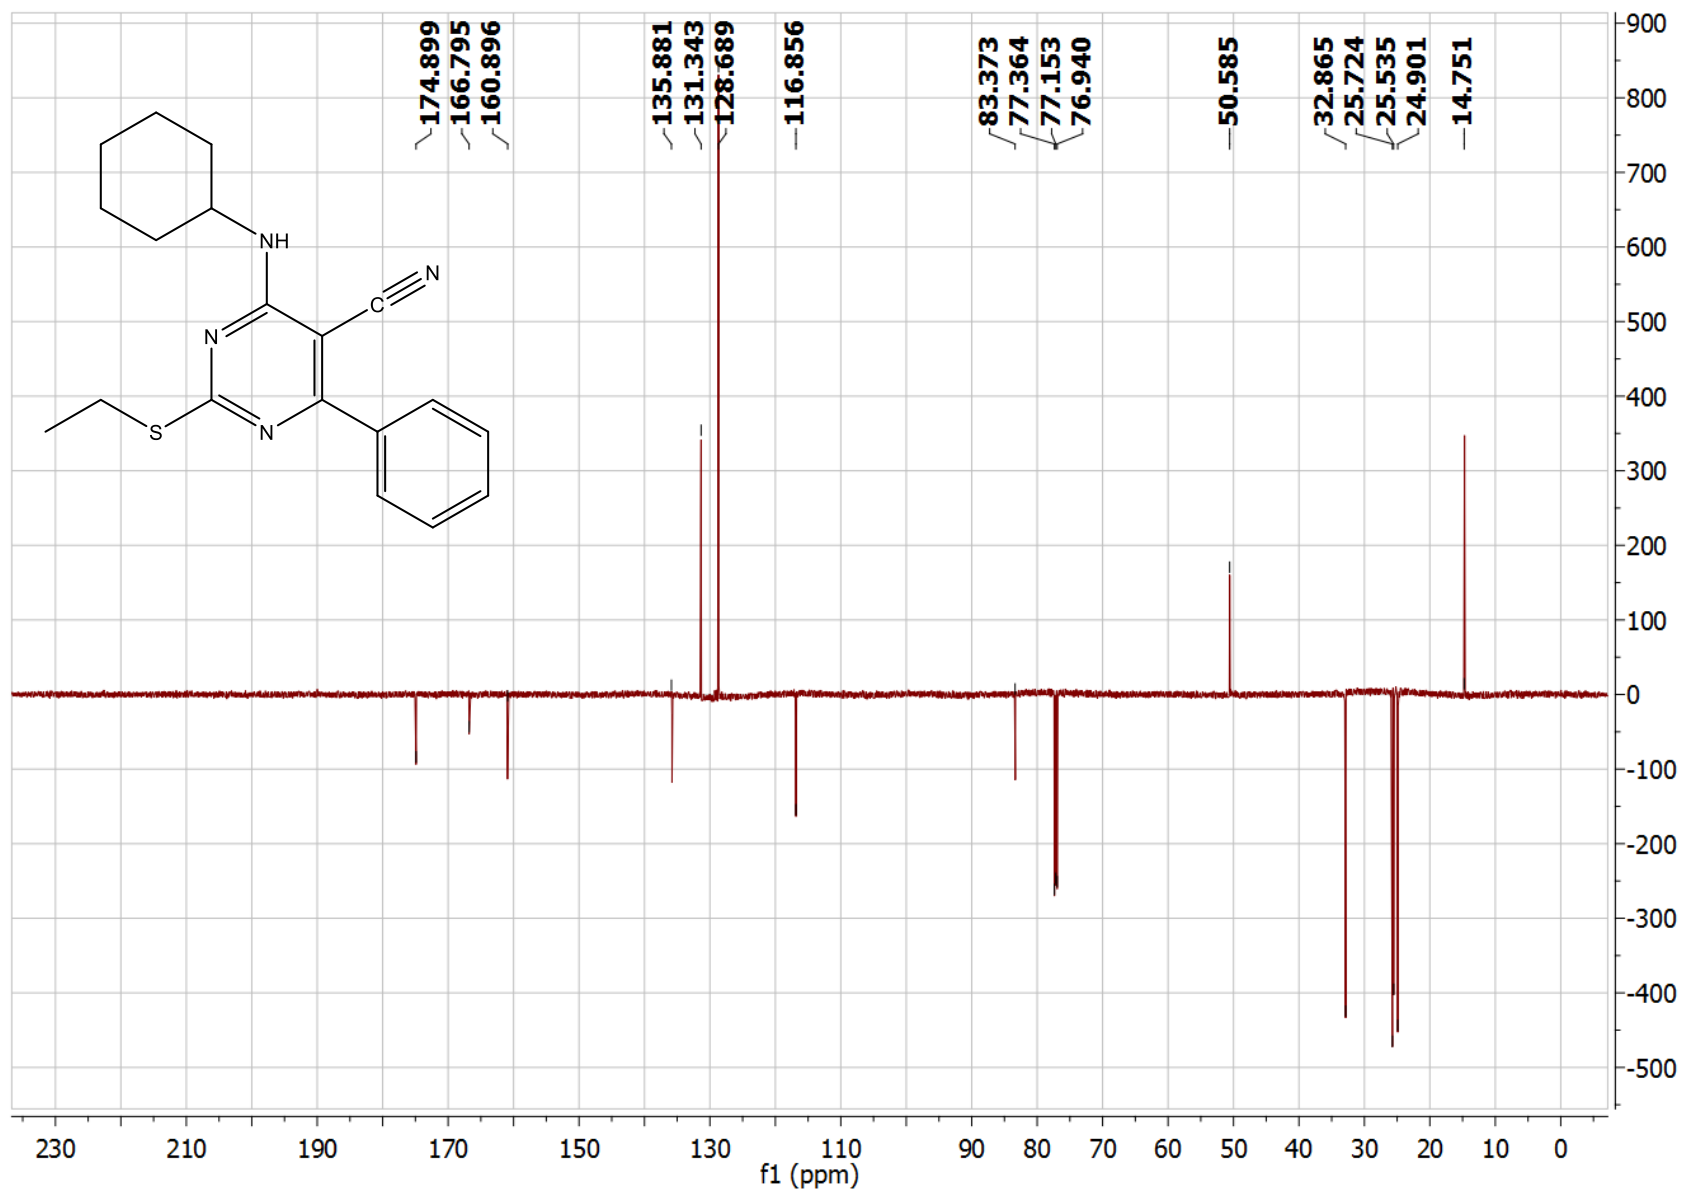

APT of compound 12<sub>a</sub>

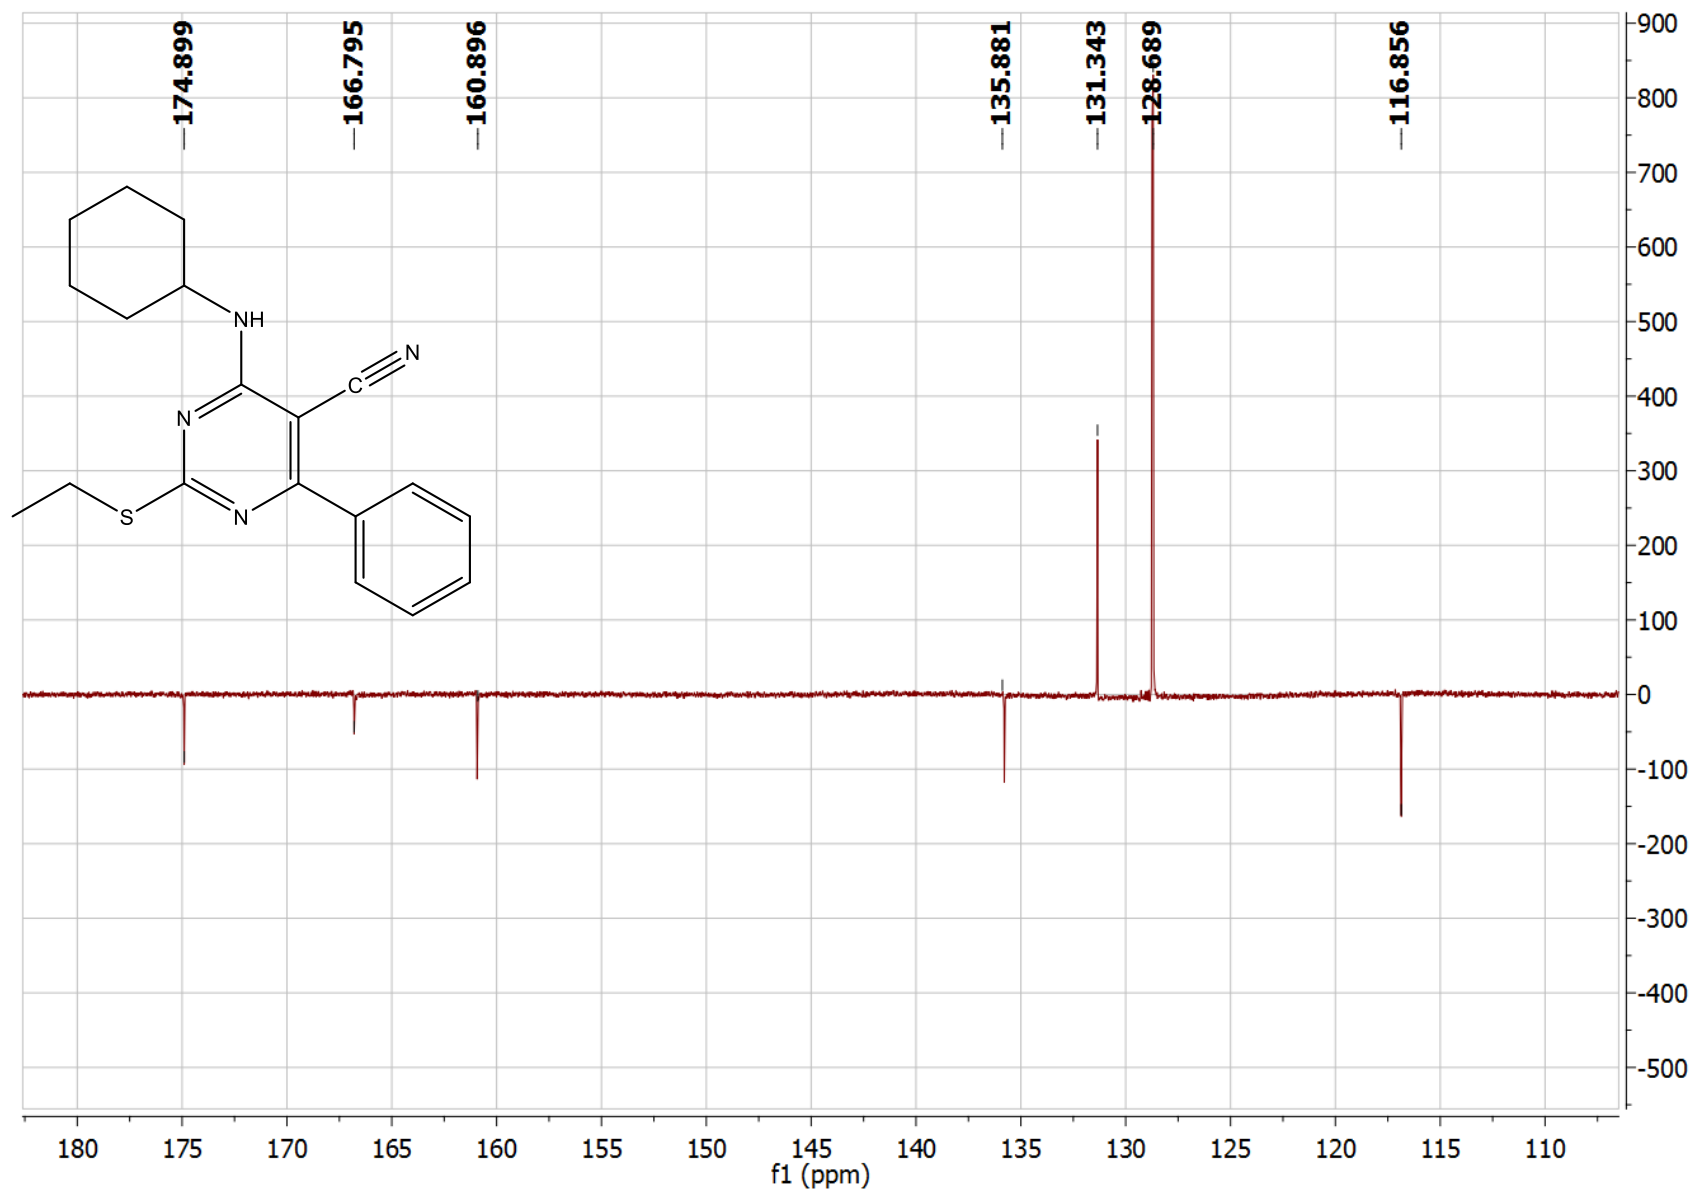

APT of compound 12<sub>a</sub>

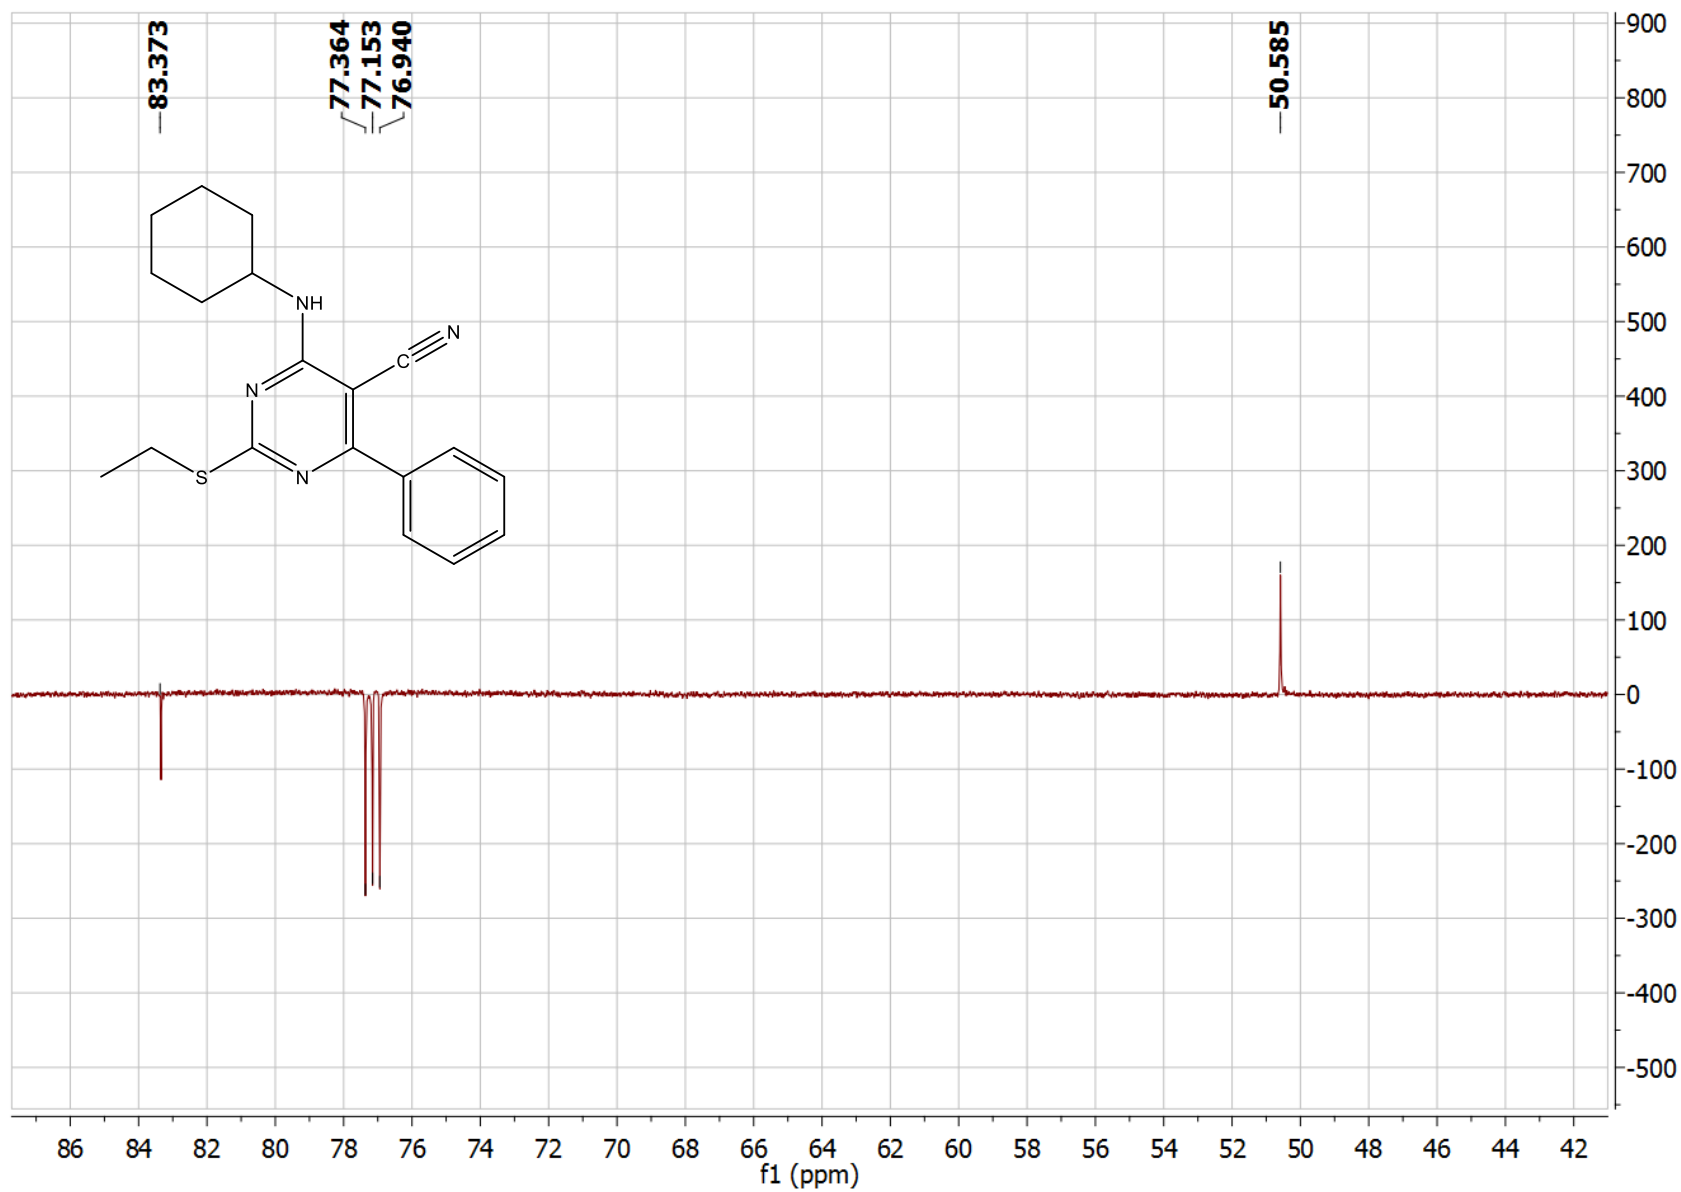

APT of compound 12<sub>a</sub>

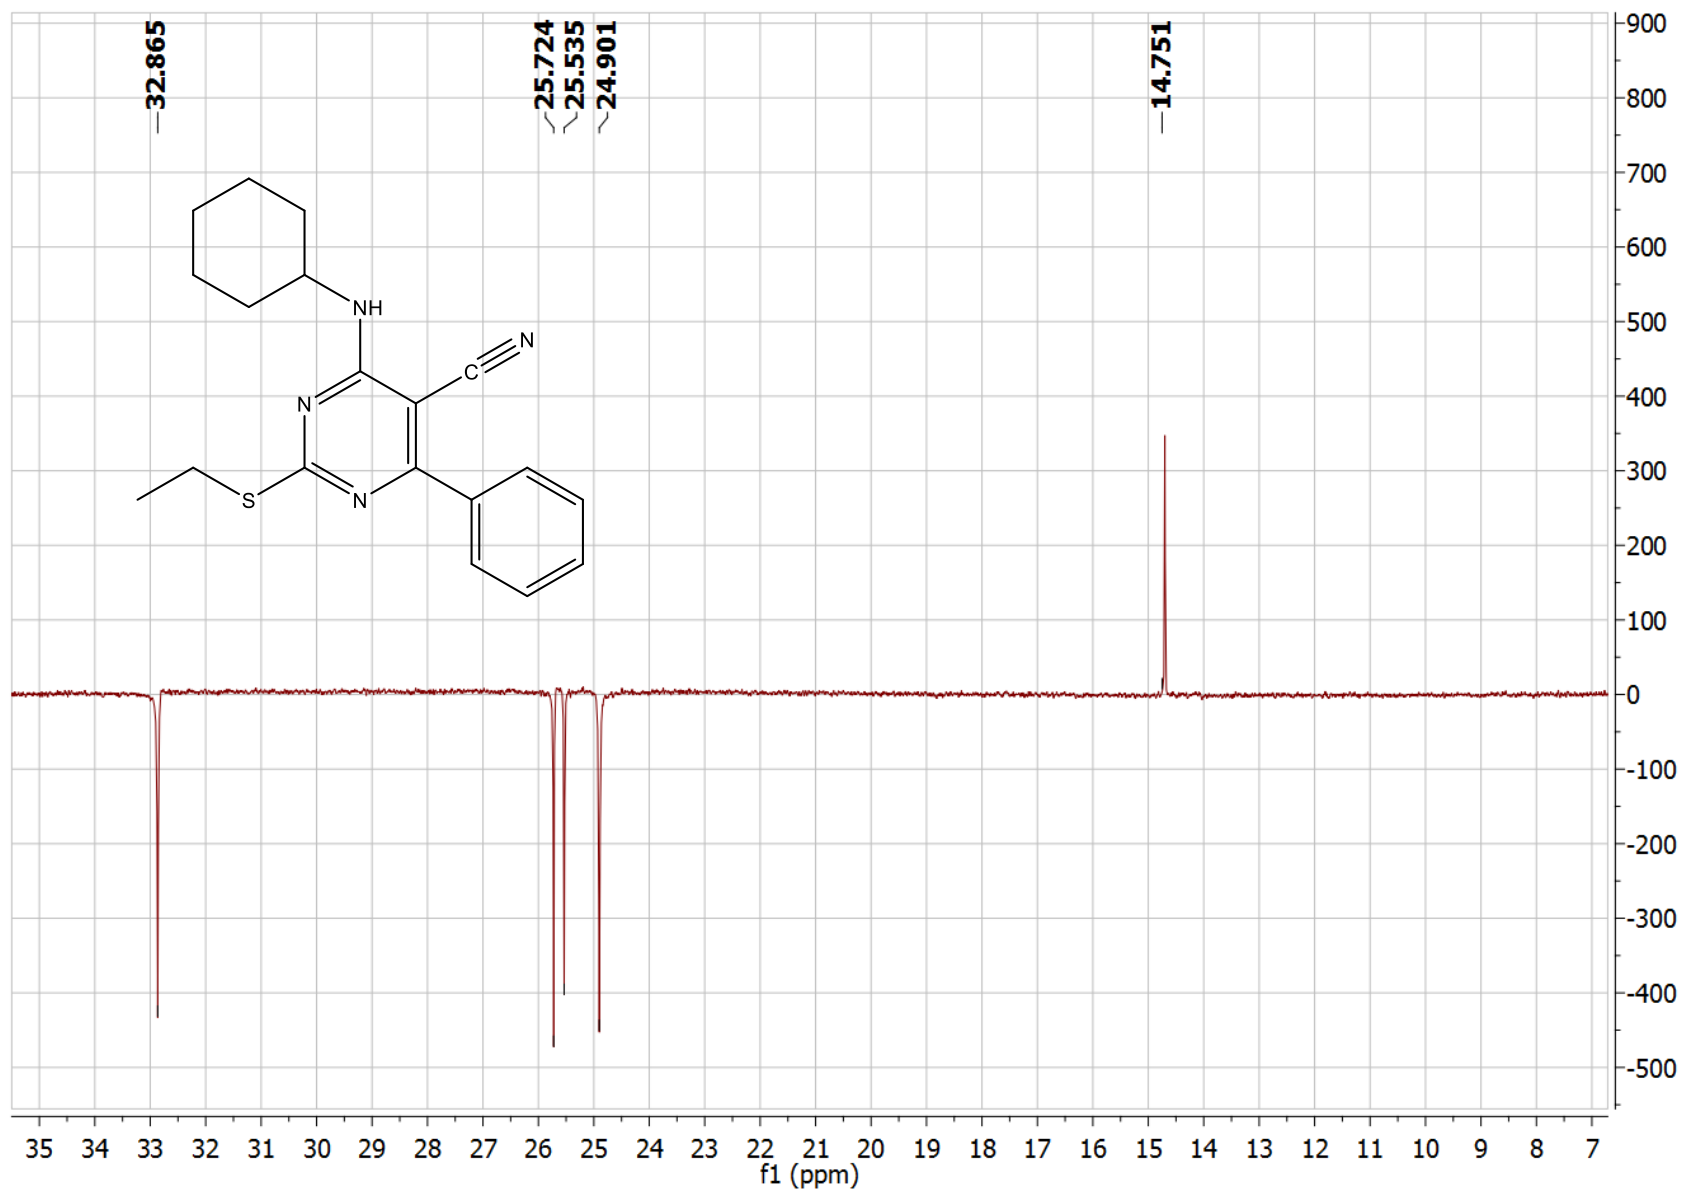

<sup>1</sup>H NMR of compound 12<sub>b</sub>

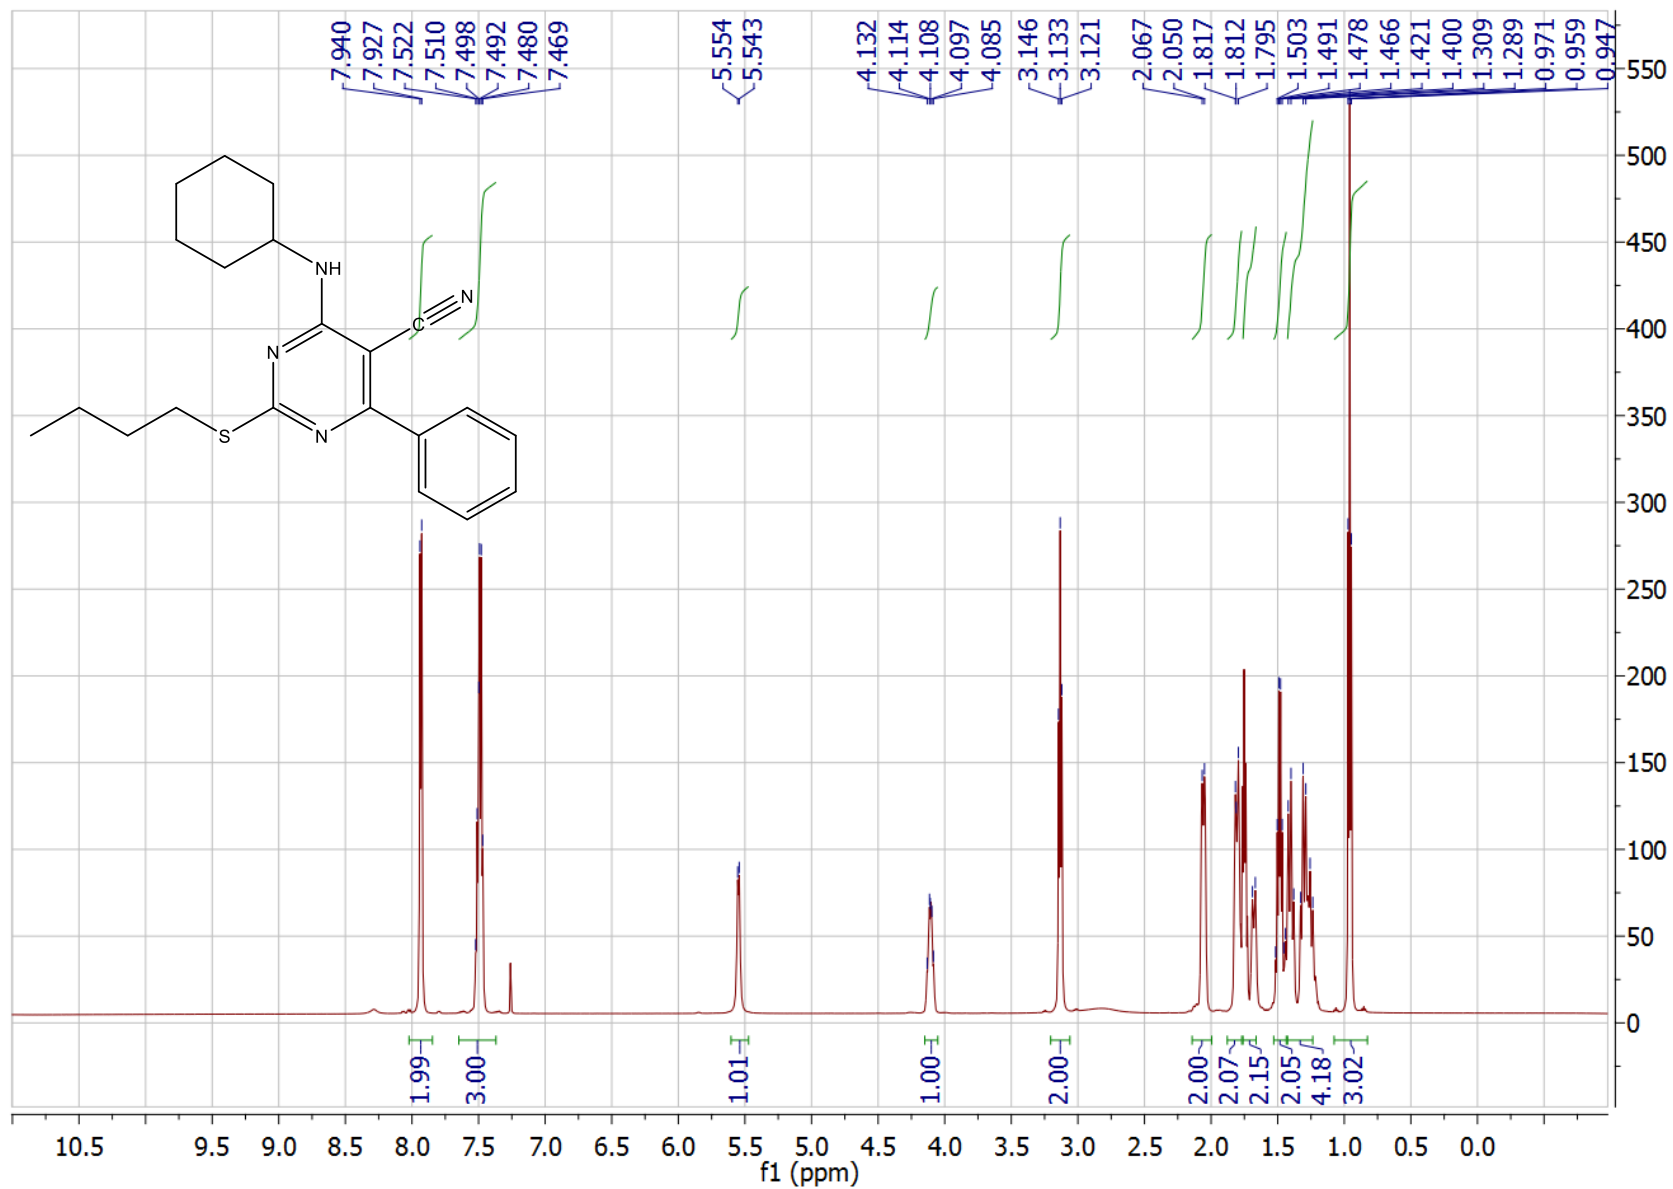



<sup>1</sup>H NMR of compound 12<sub>b</sub>

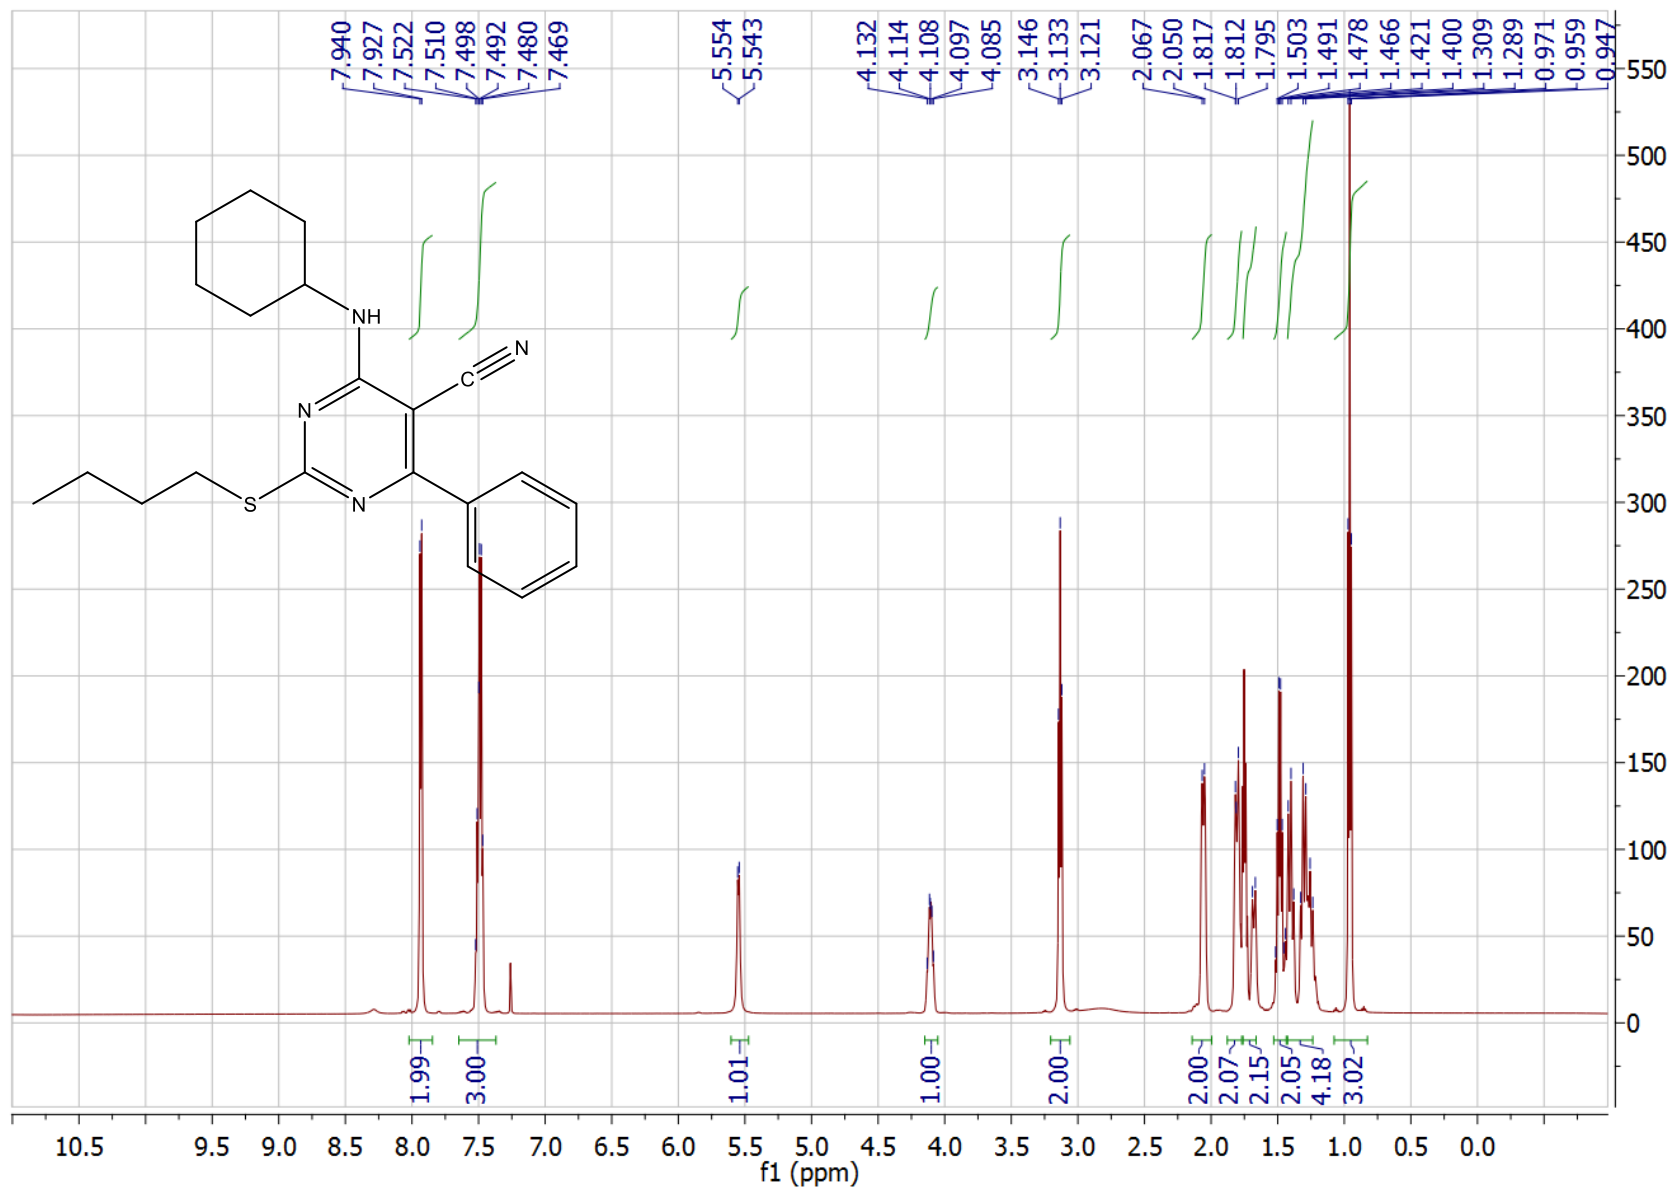

<sup>1</sup>H NMR of compound 12<sub>b</sub>

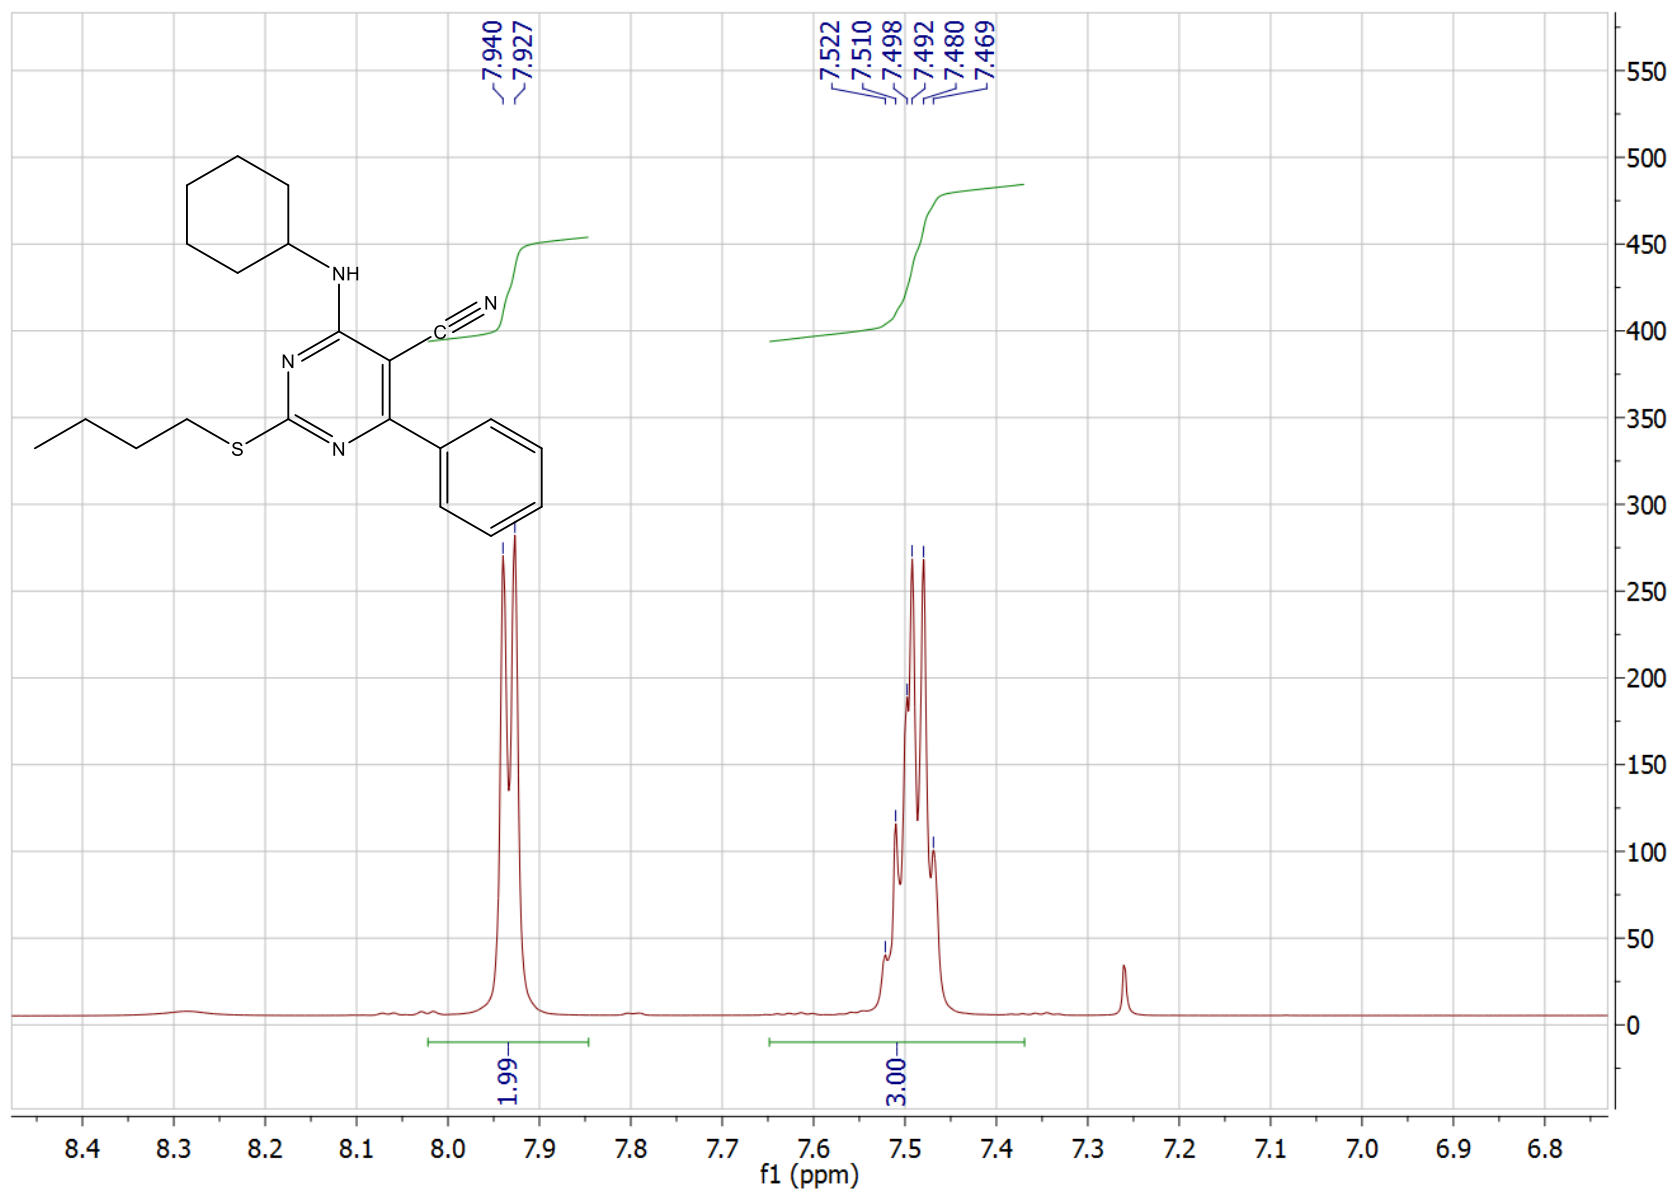

<sup>13</sup>C NMR of compound 12<sub>b</sub>

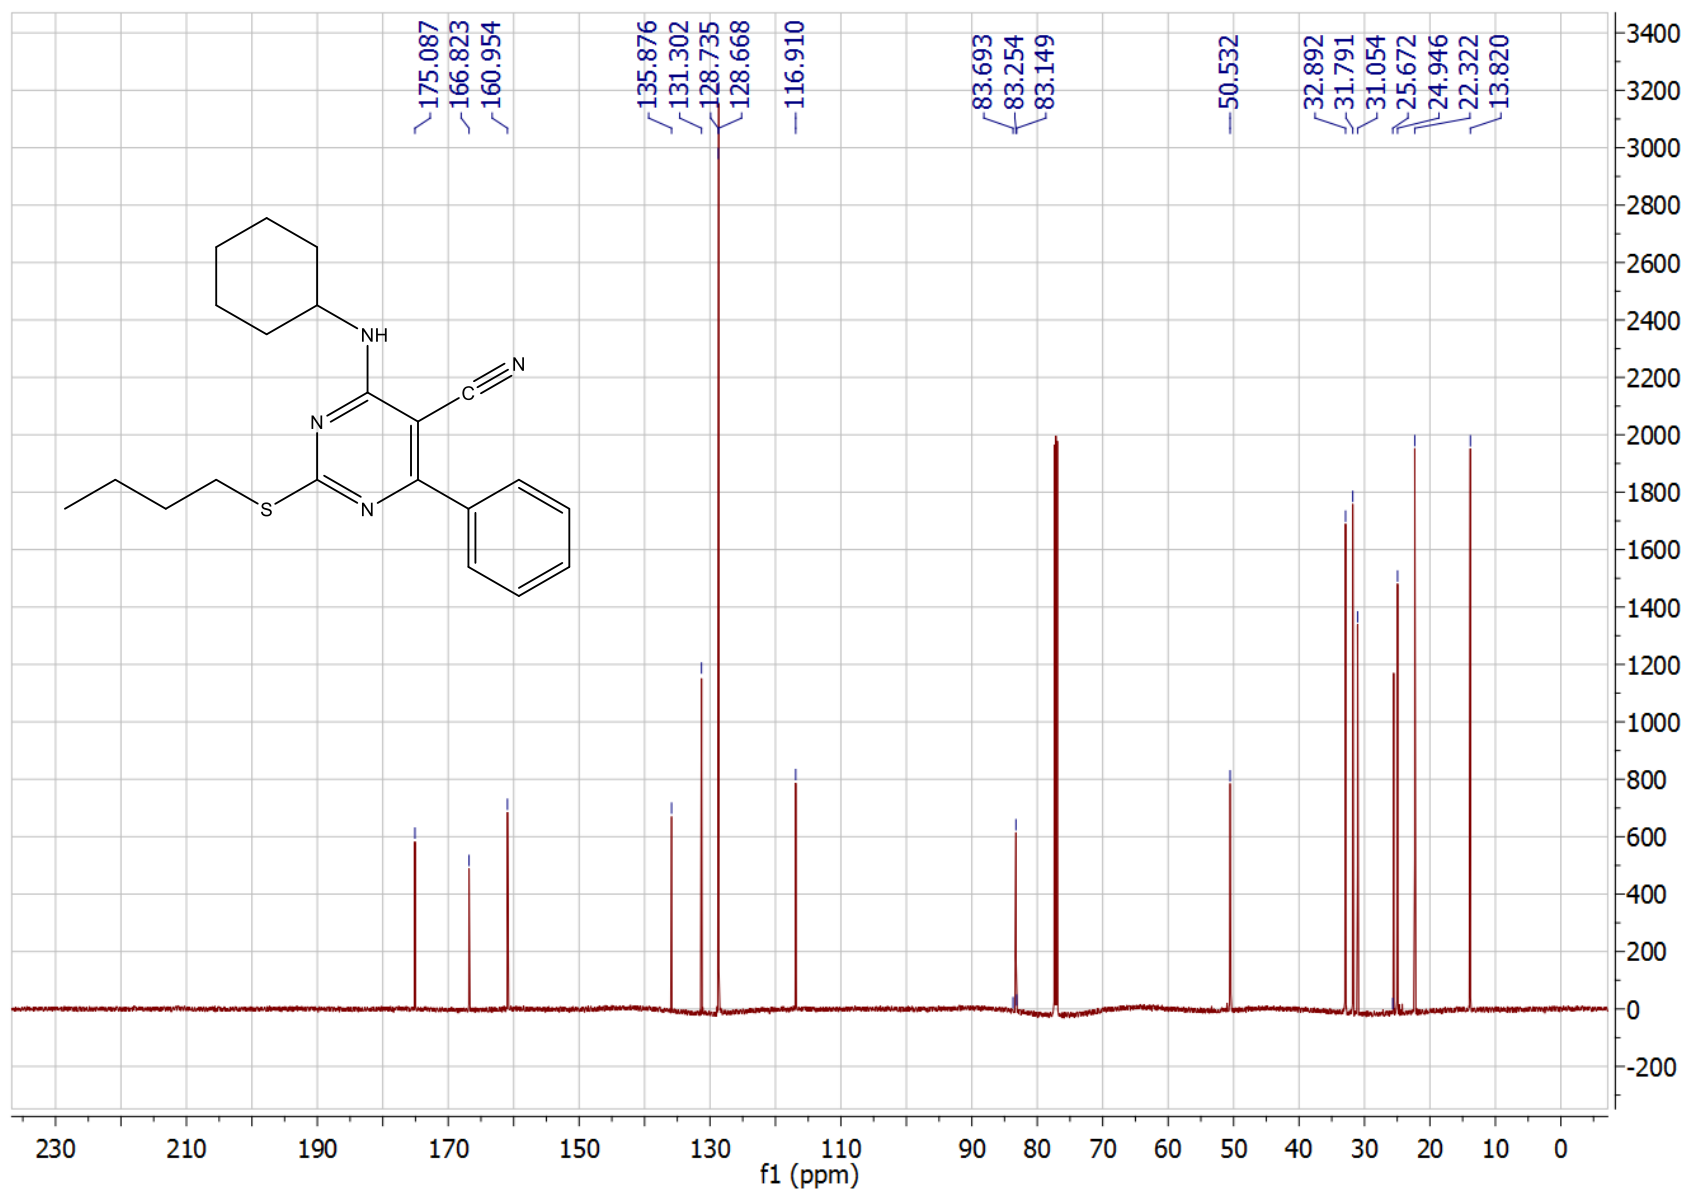

<sup>13</sup>C NMR of compound 12<sub>b</sub>

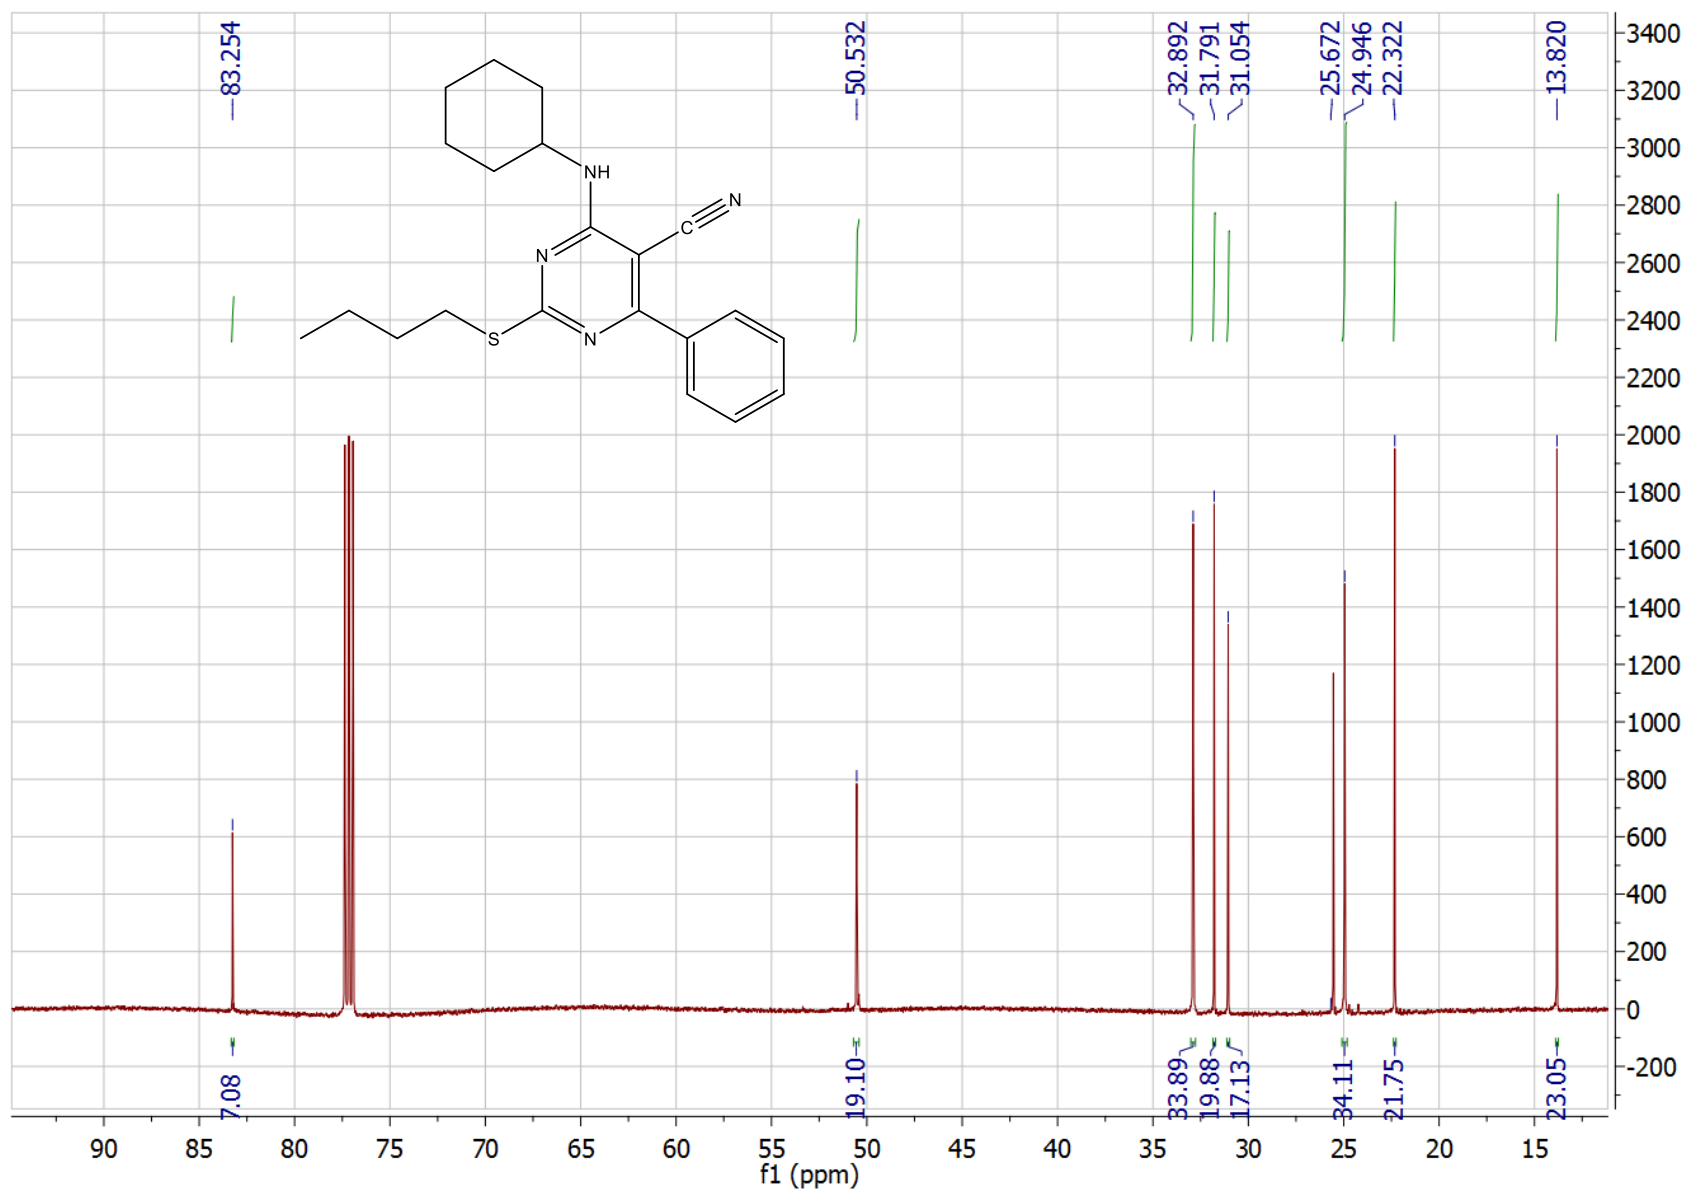

APT of compound 12<sub>b</sub>

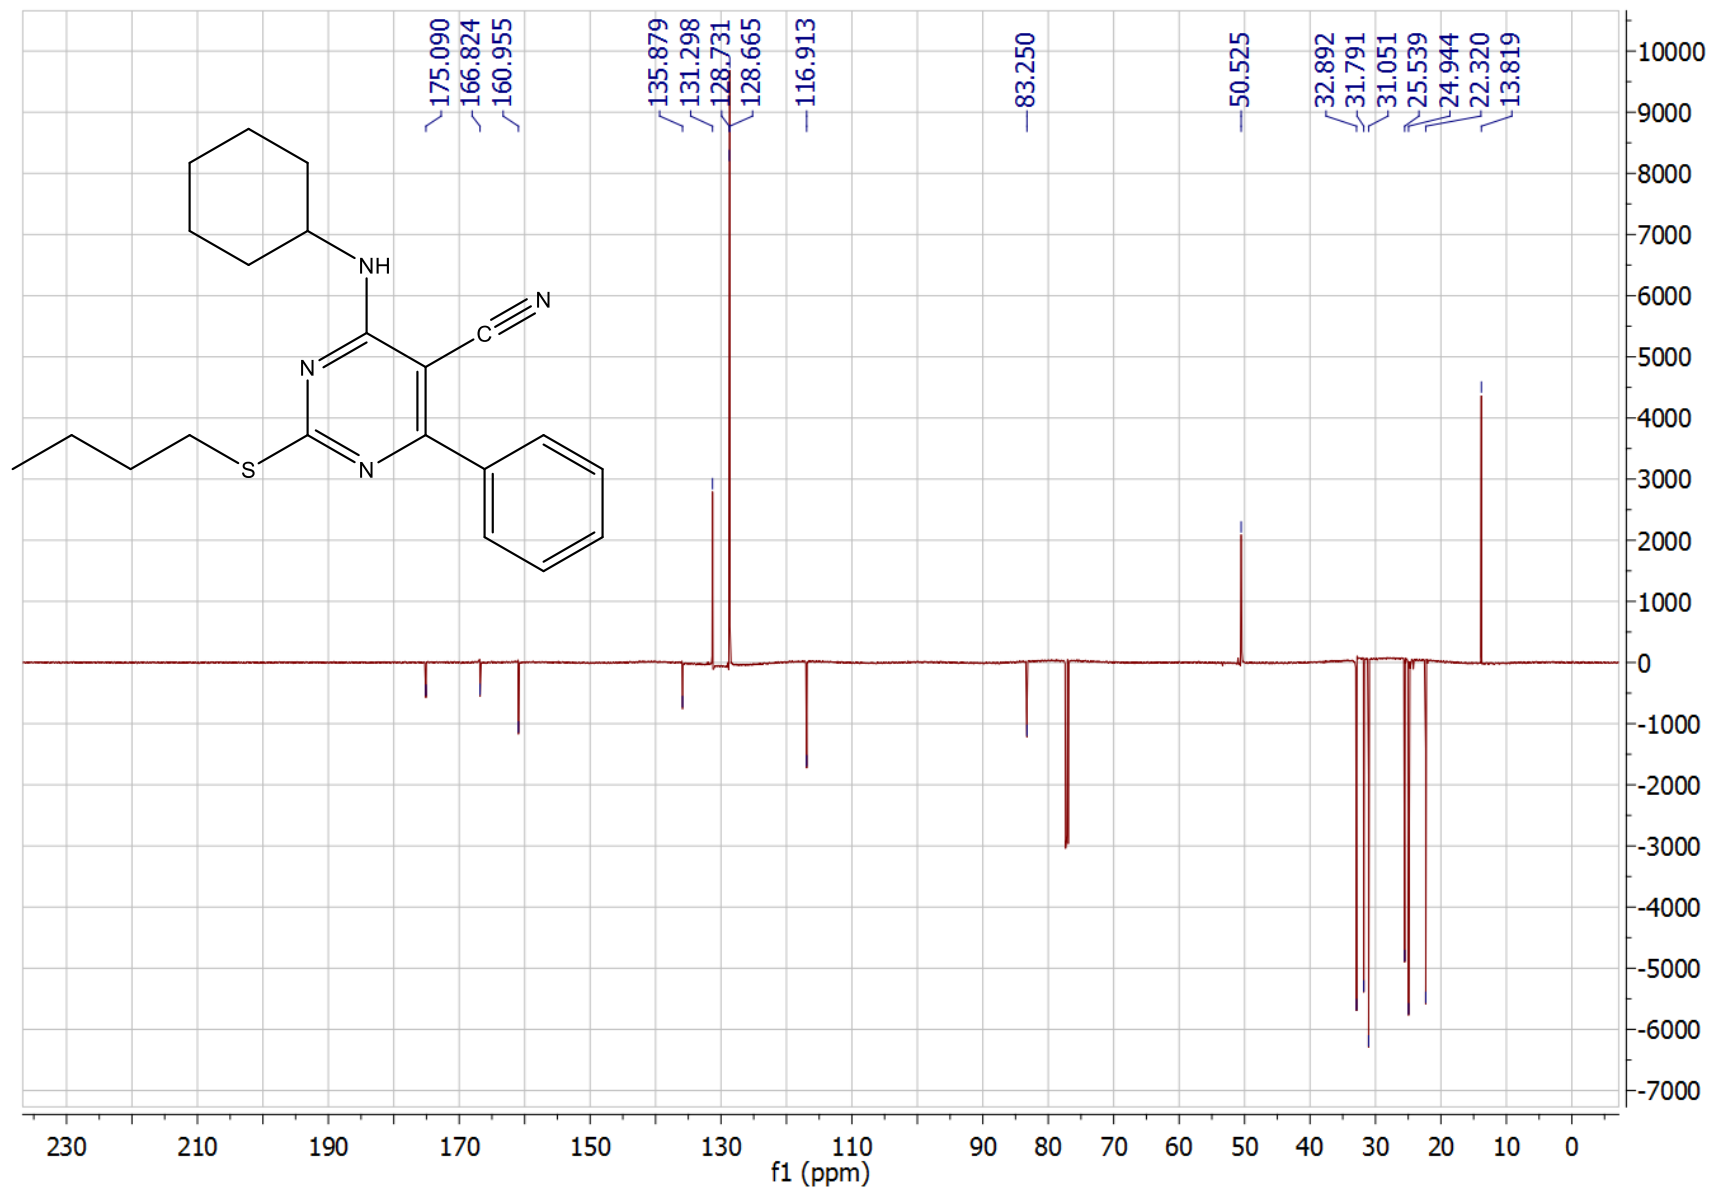

<sup>1</sup>H NMR of compound 13<sub>a</sub>

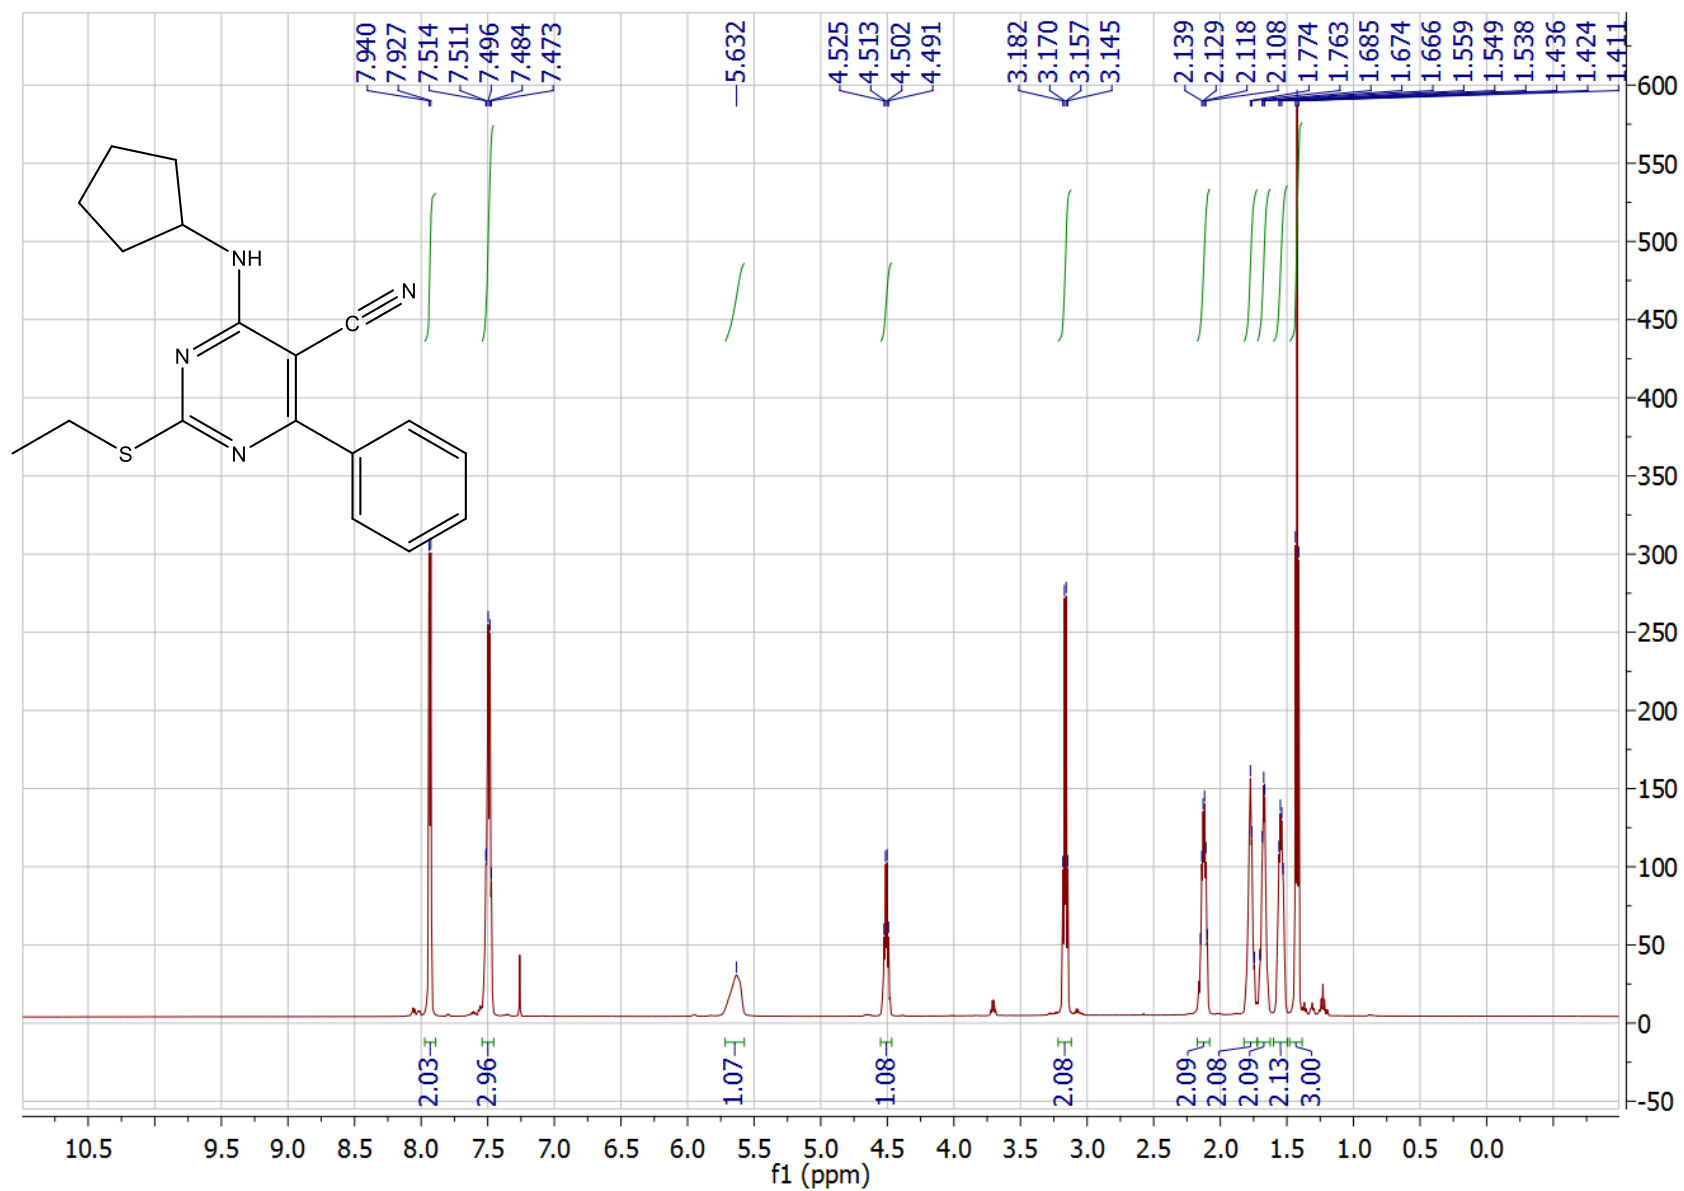

<sup>1</sup>H NMR of compound 13<sub>a</sub>

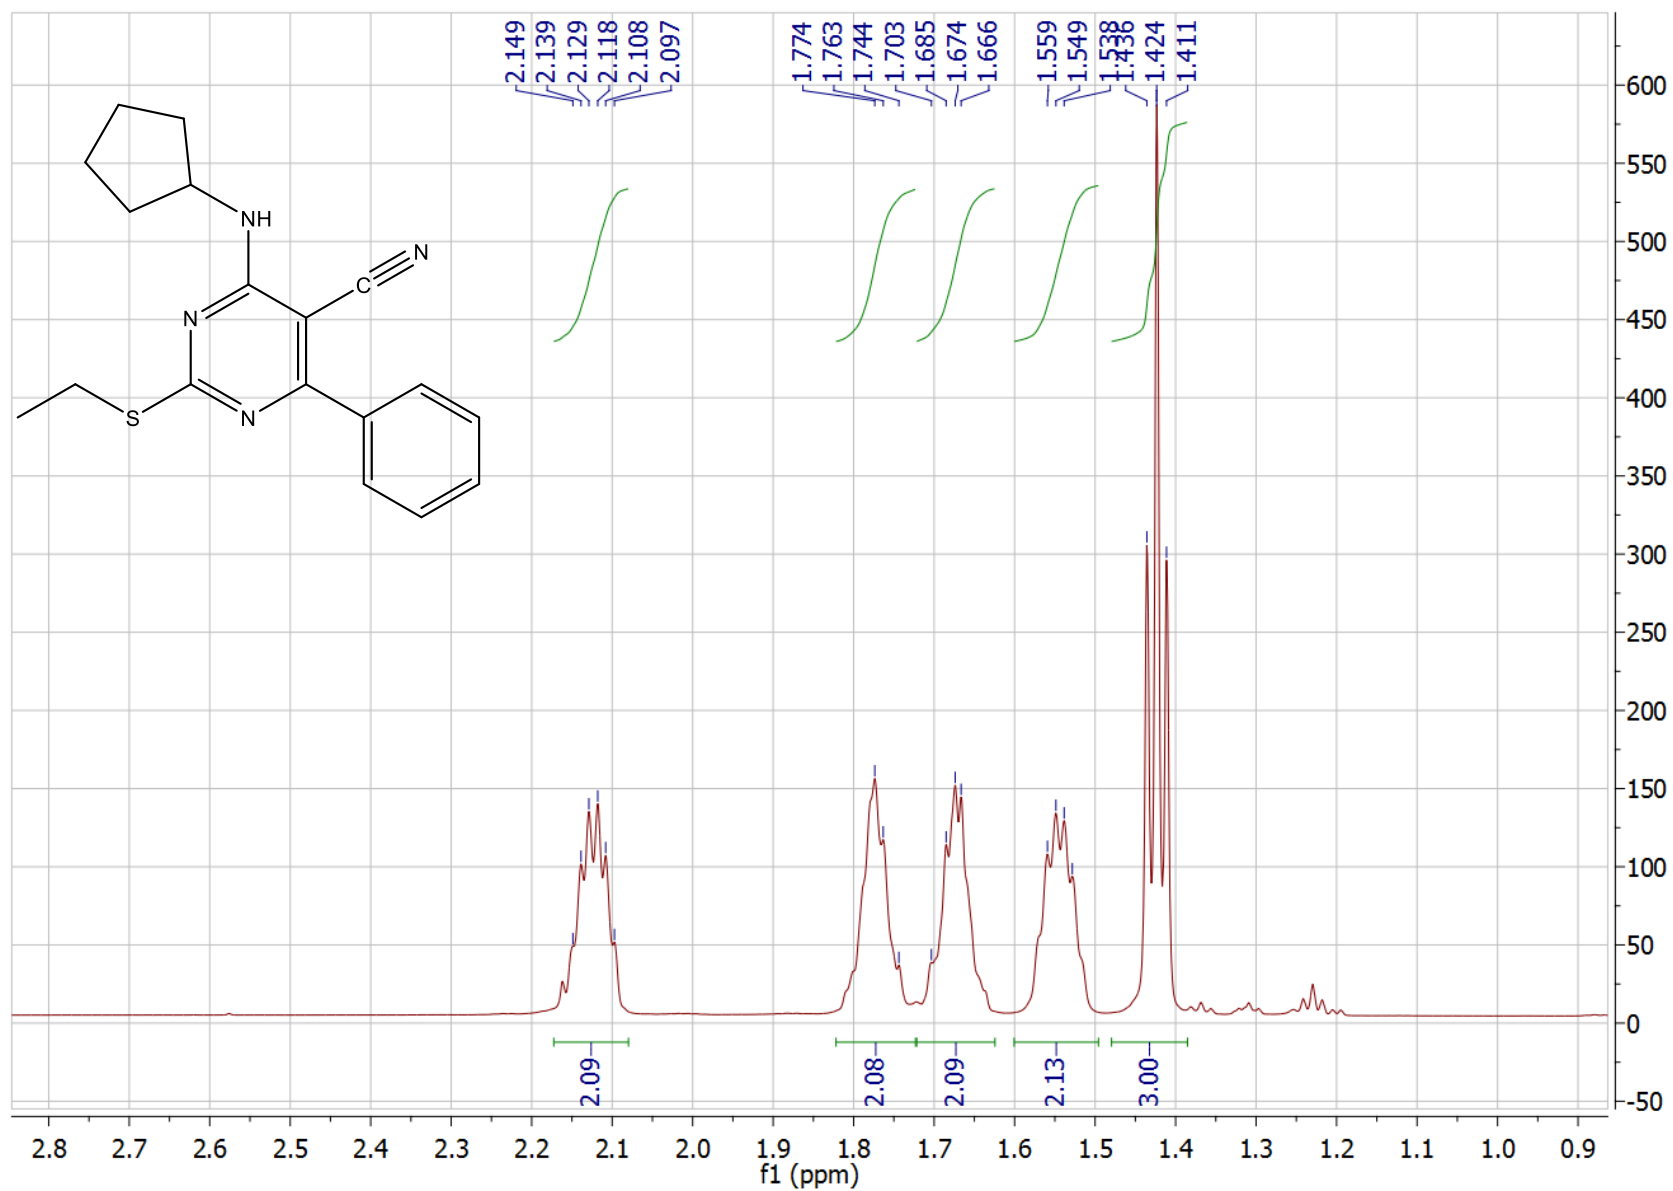

<sup>1</sup>H NMR of compound 13<sub>a</sub>

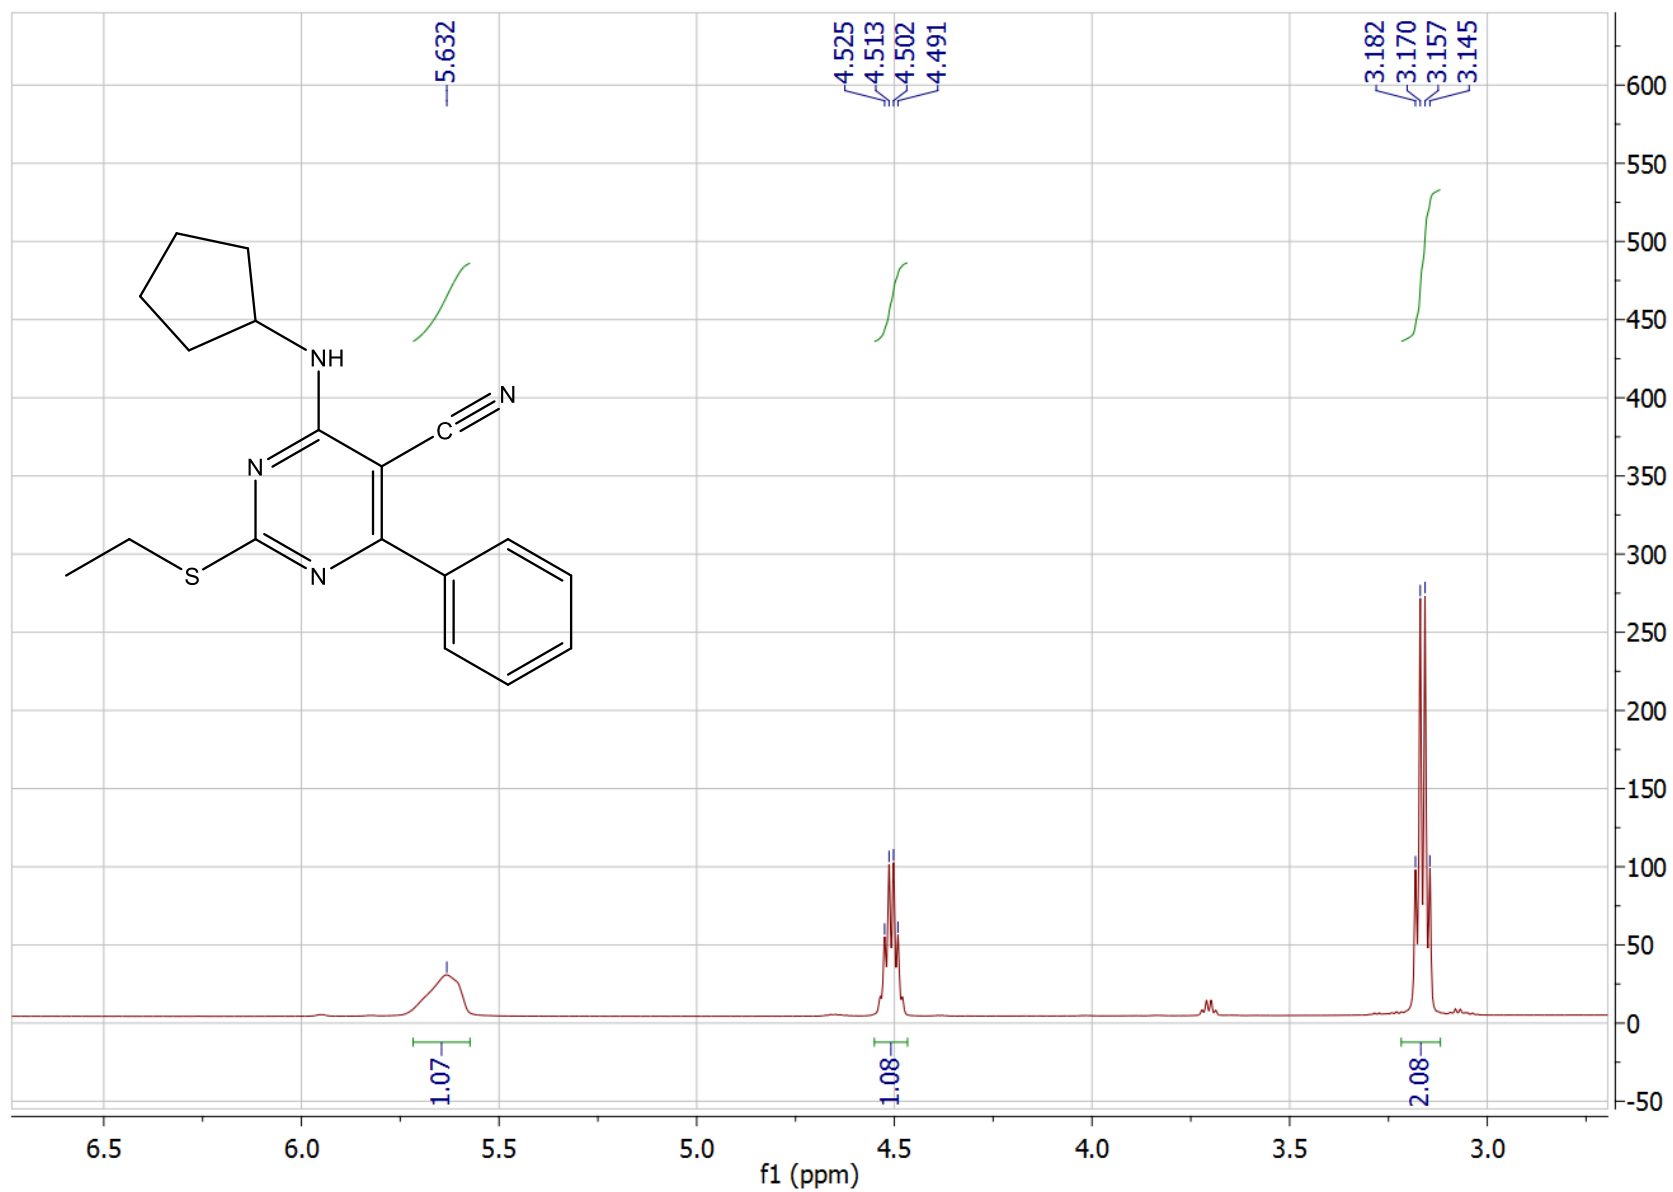



<sup>1</sup>H NMR of compound 13<sub>a</sub>

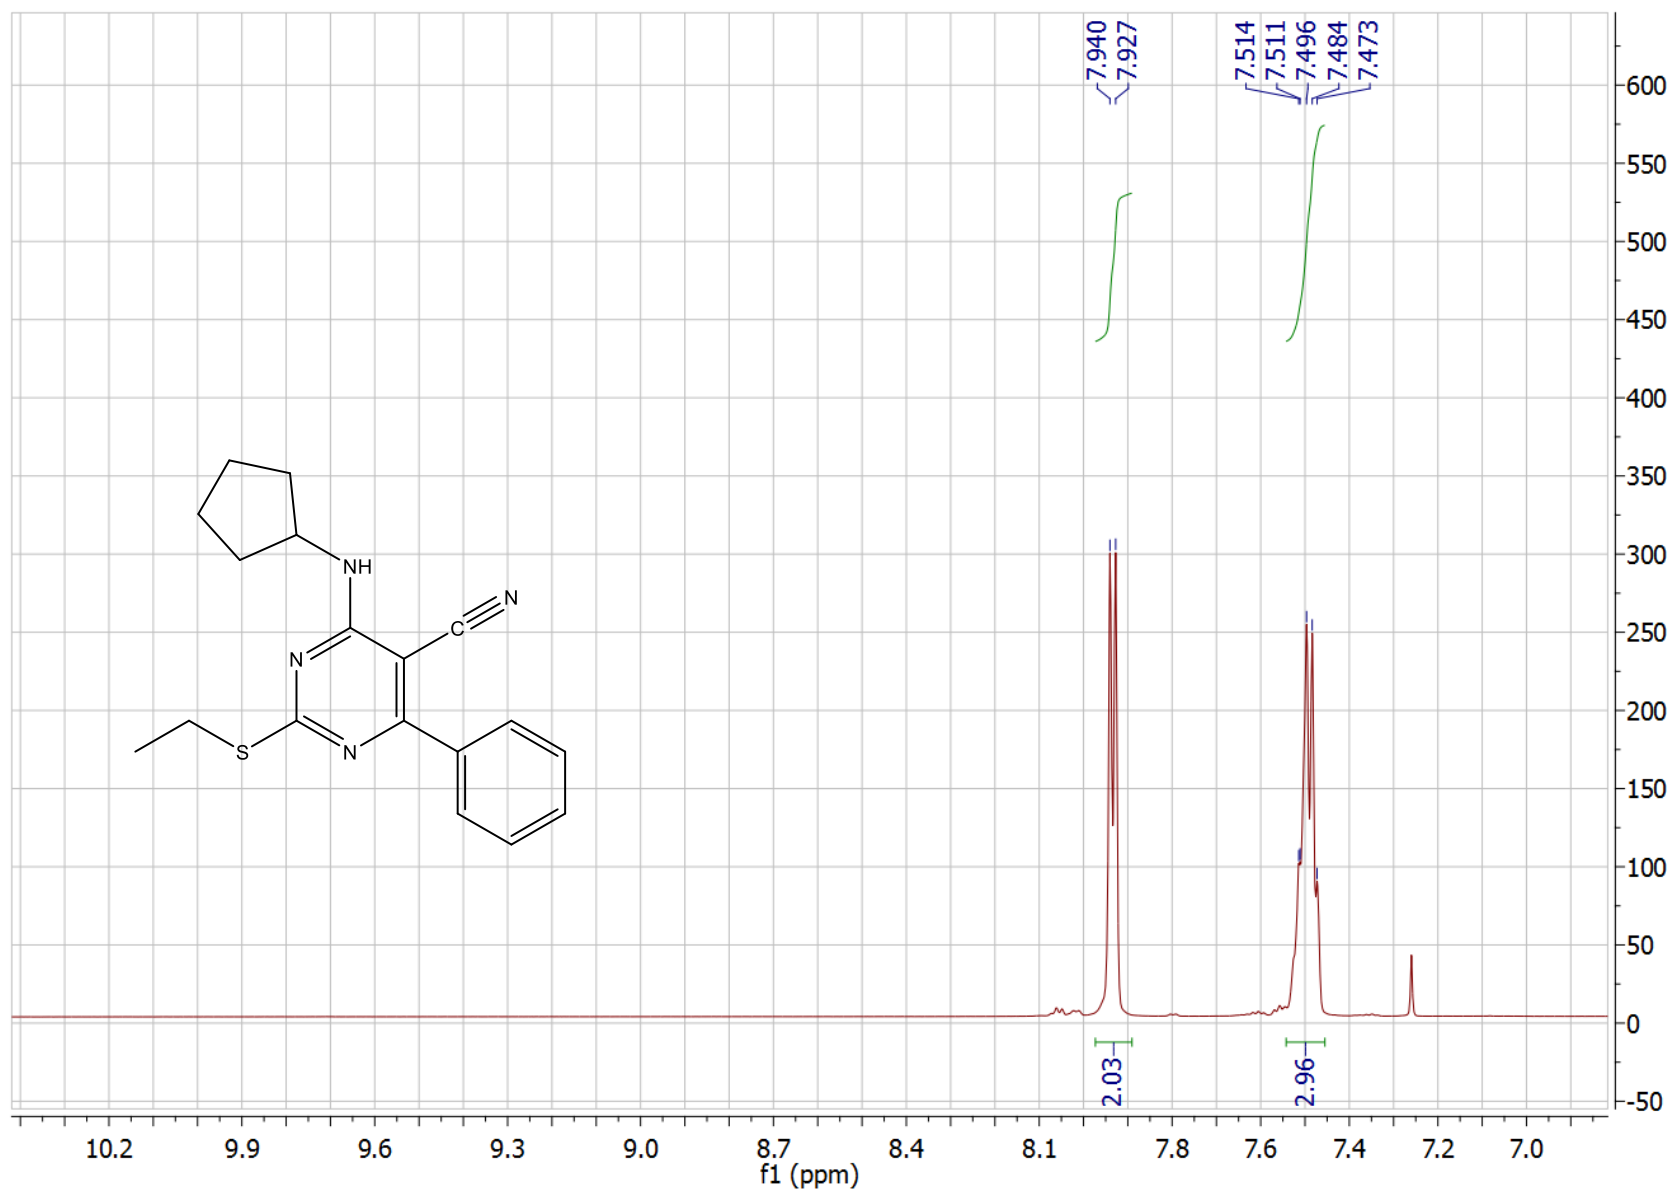

<sup>13</sup>C NMR of compound 13<sub>a</sub>

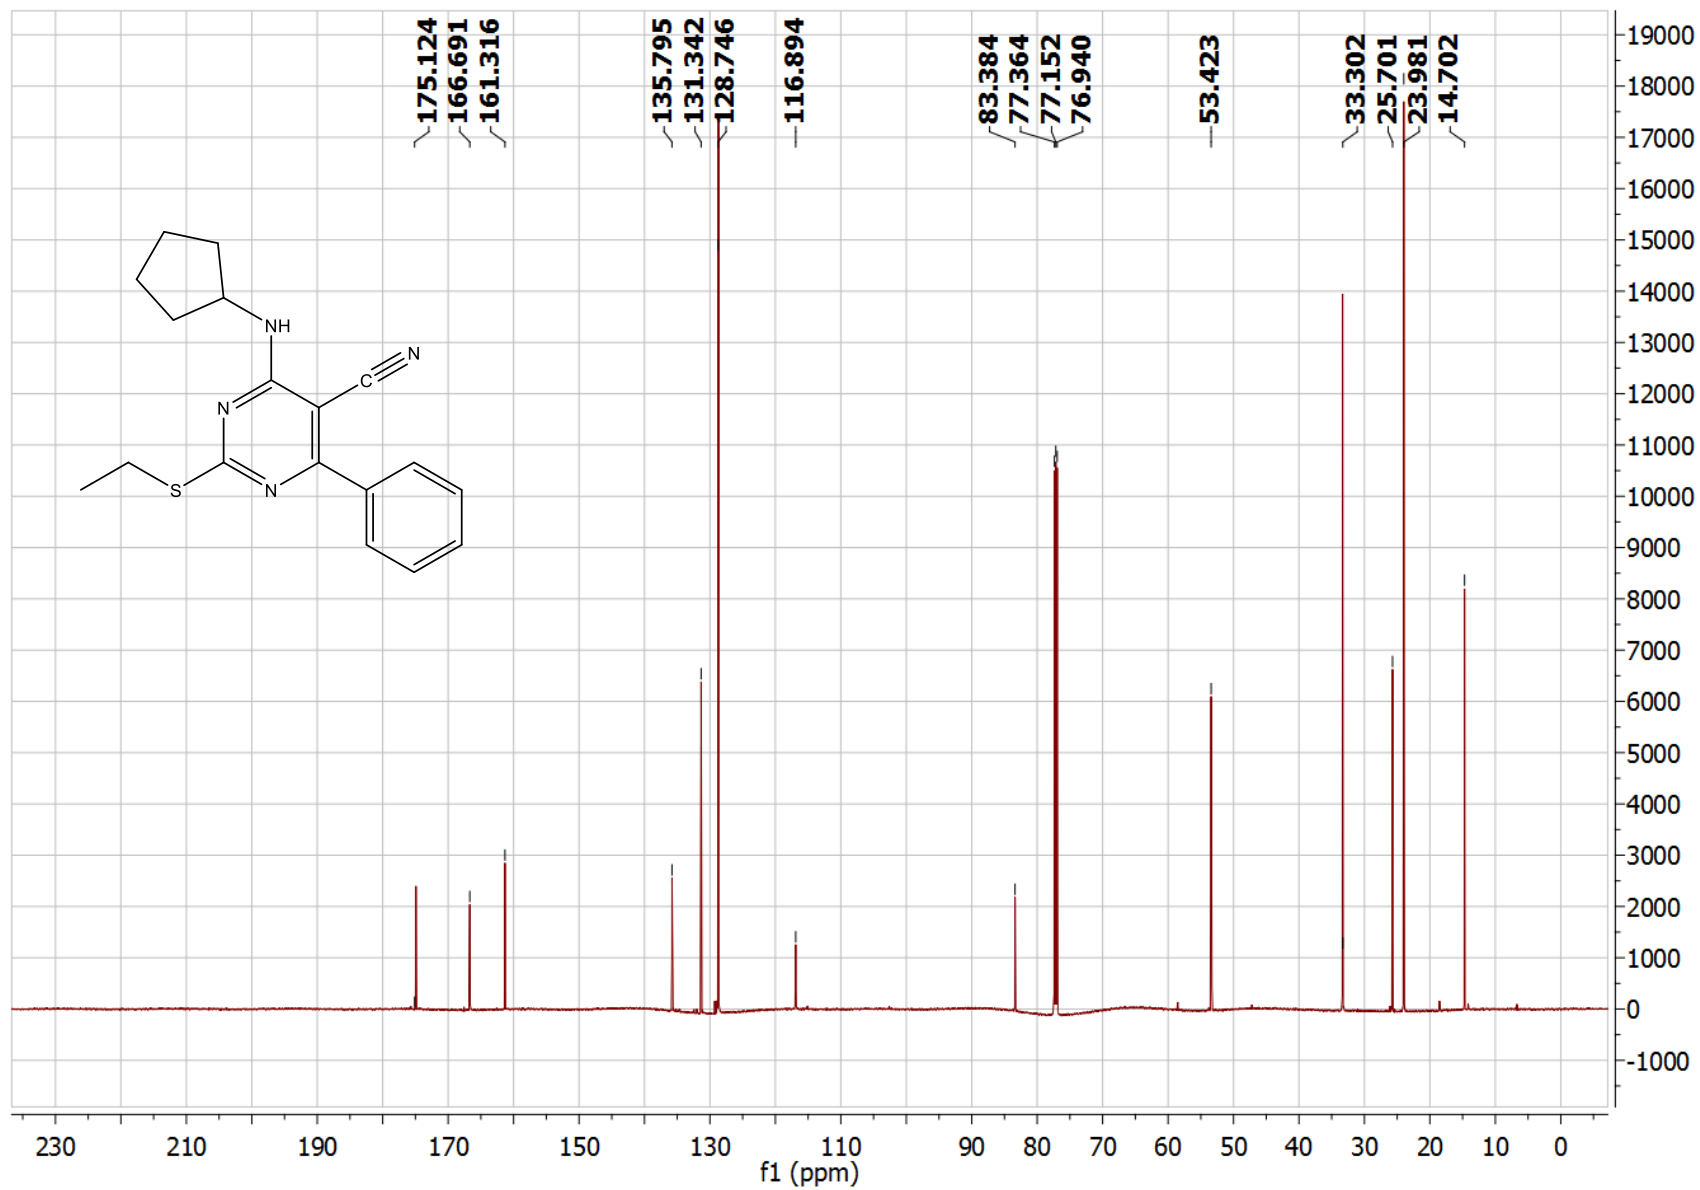

APT of compound 13<sub>a</sub>

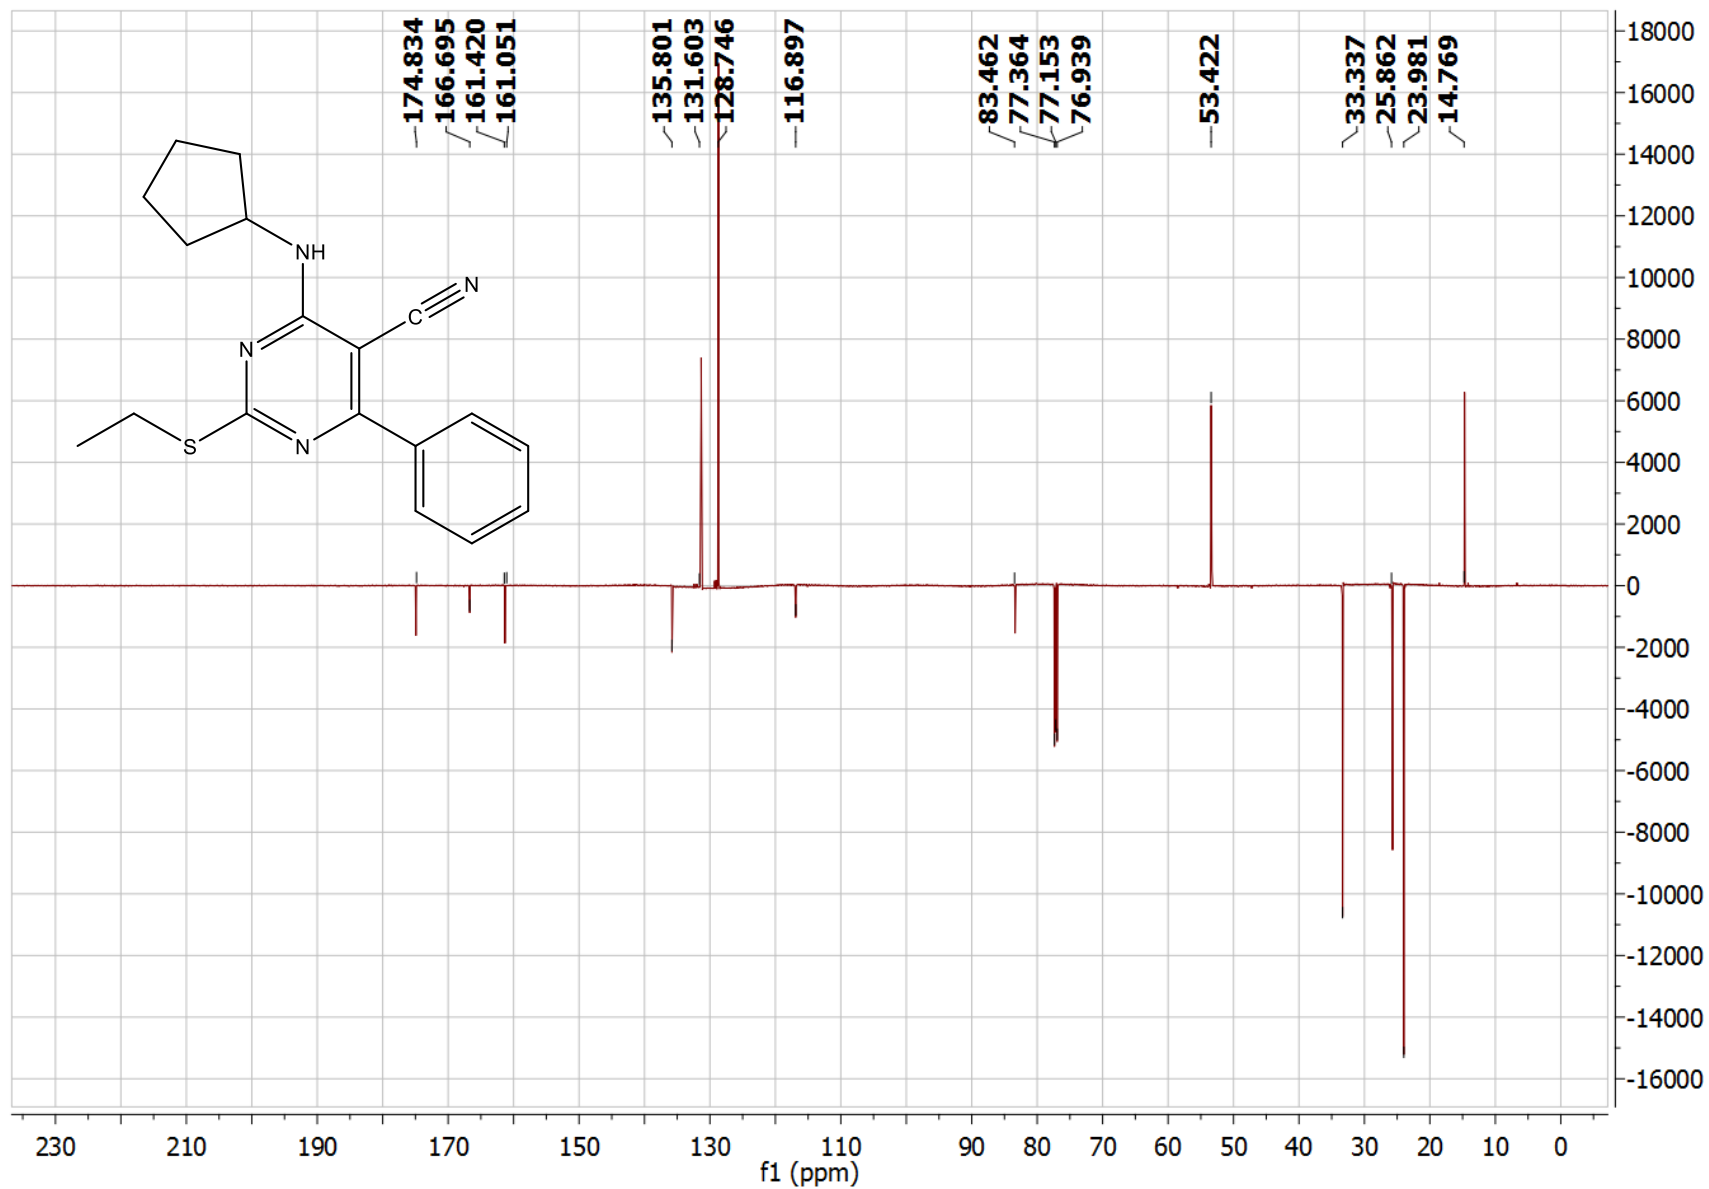

<sup>1</sup>H NMR of compound 13<sub>b</sub>

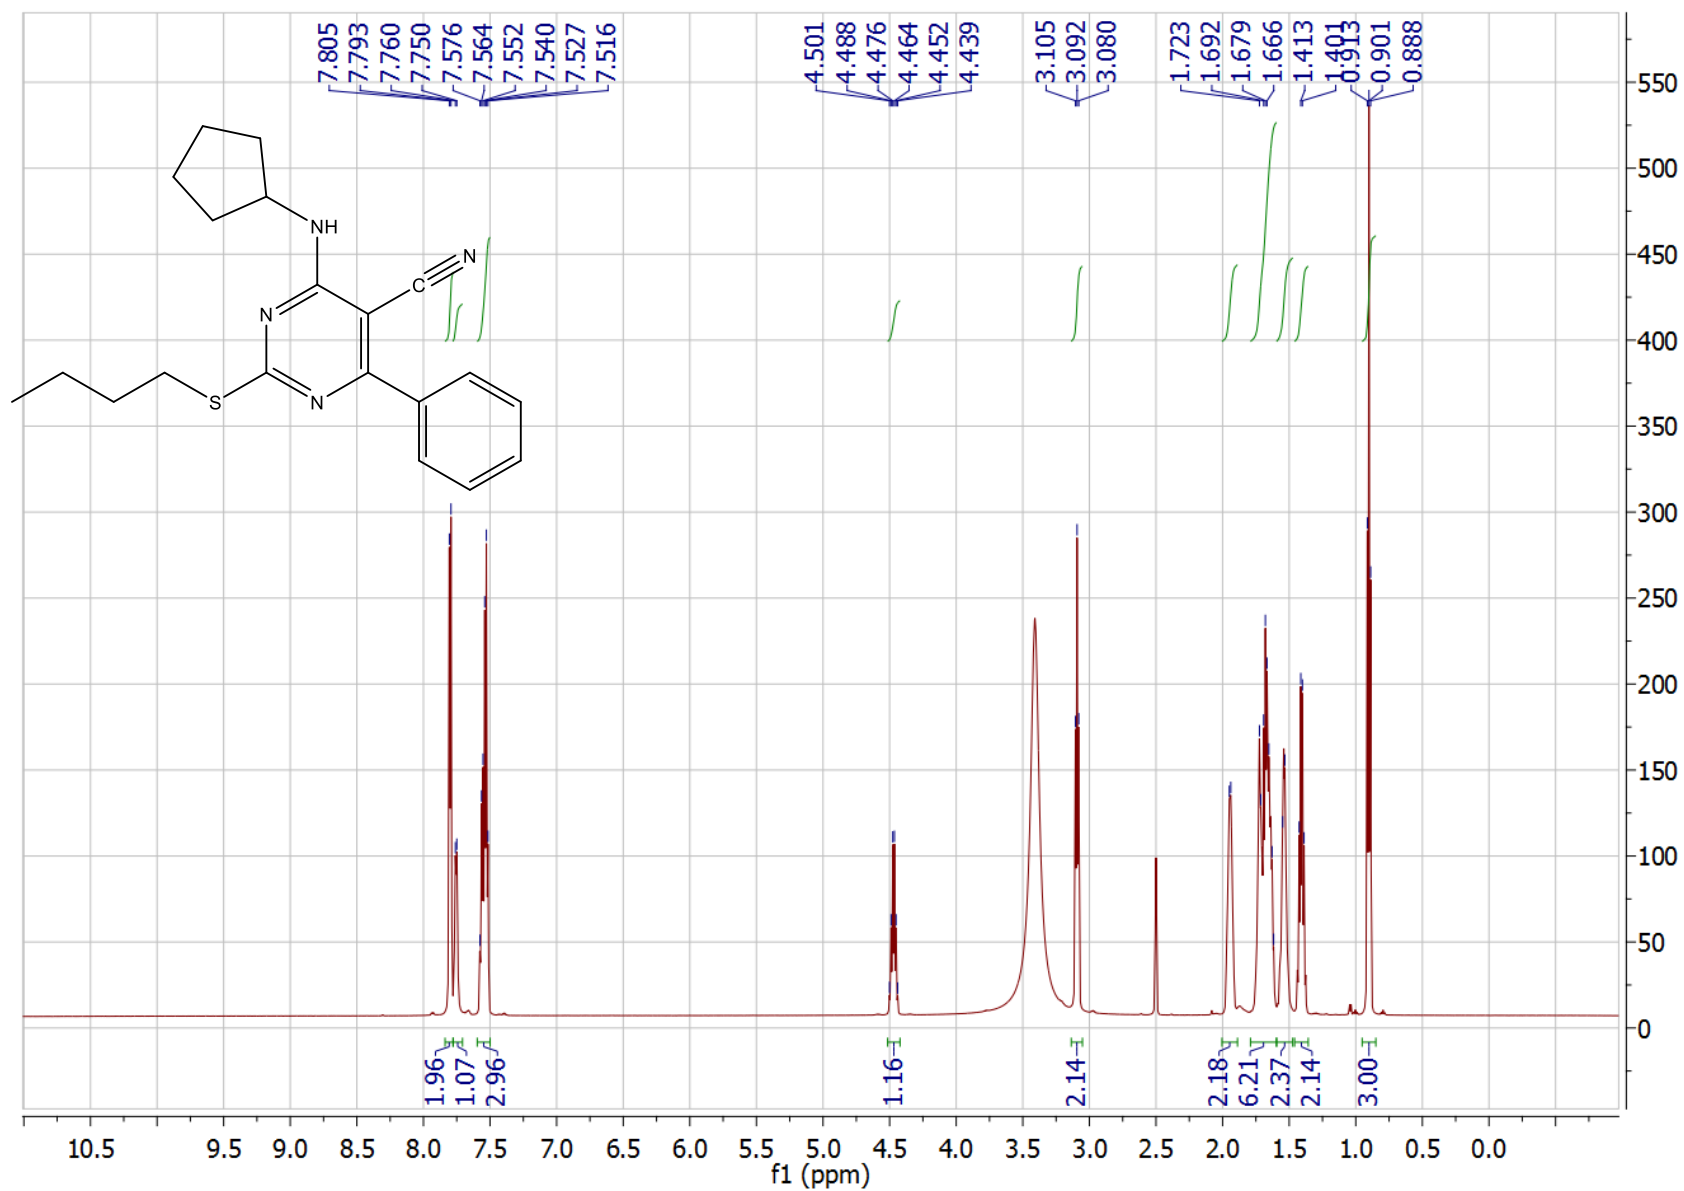

**<sup>1</sup>H NMR of compound 13<sub>b</sub>**

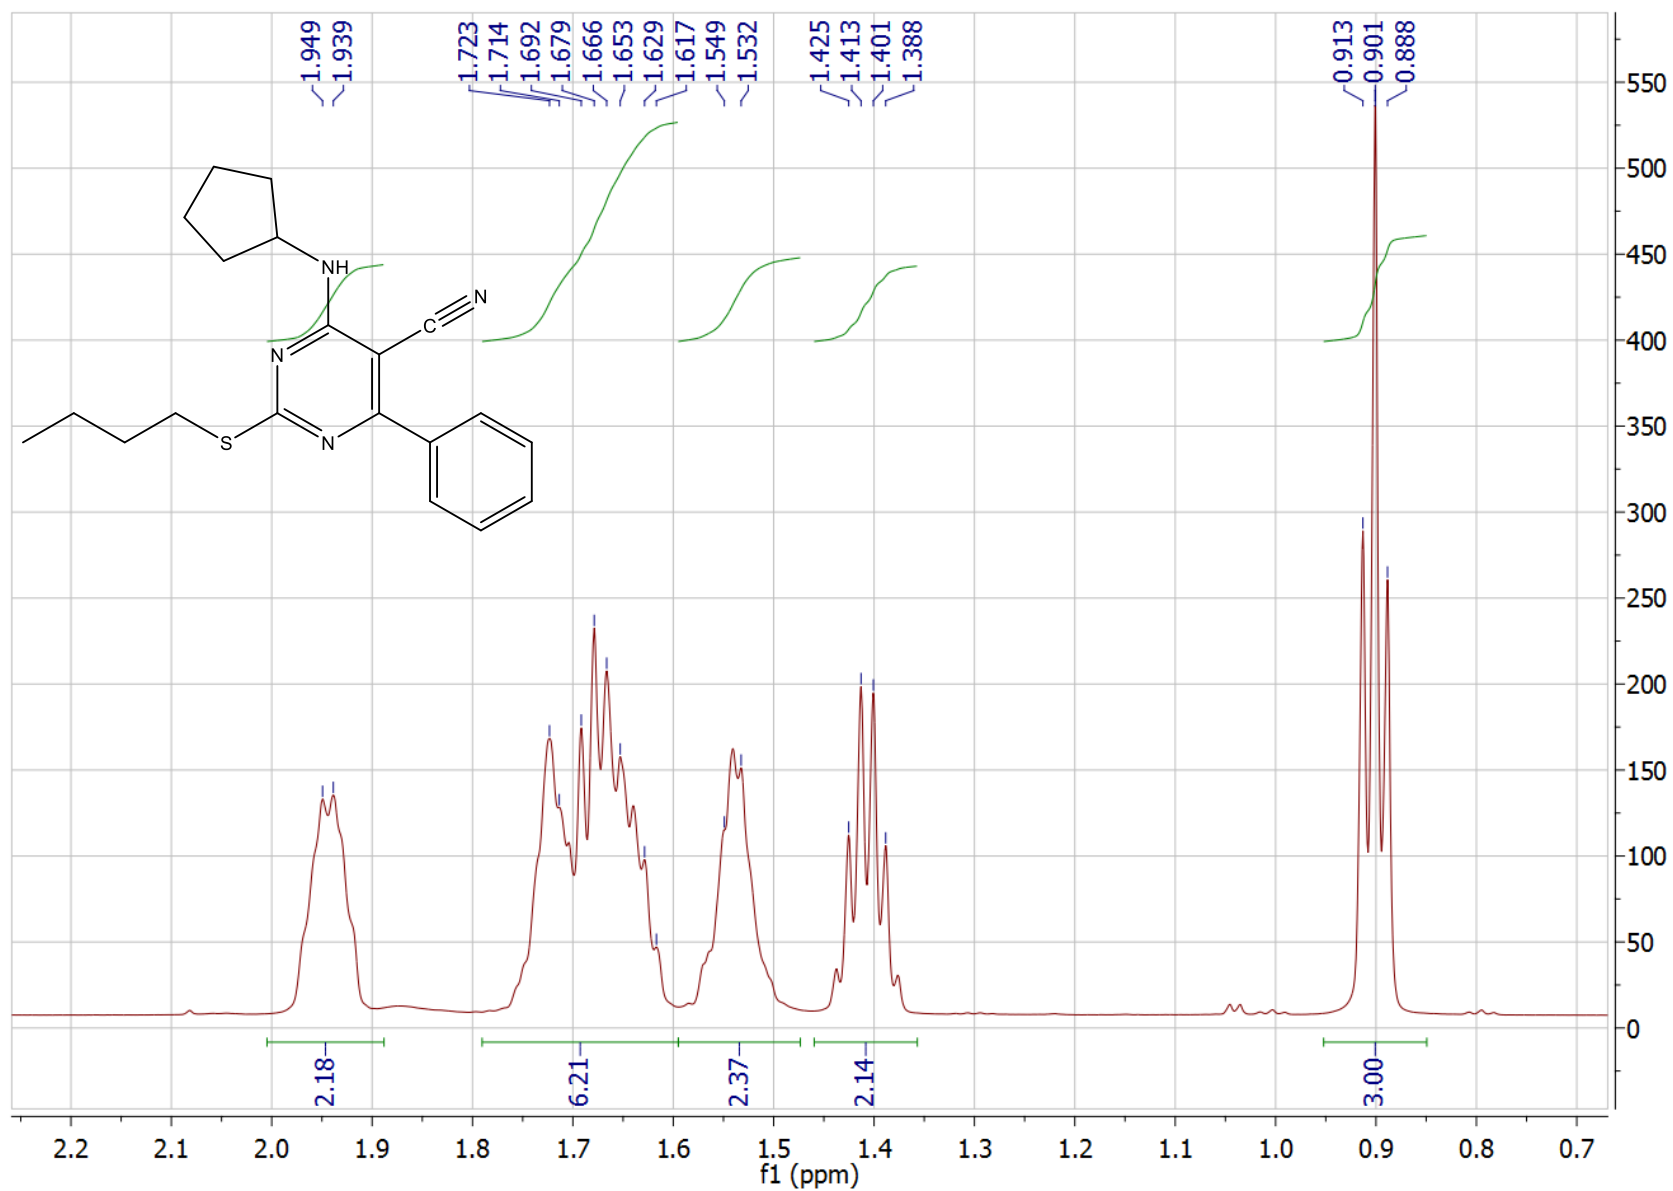

<sup>1</sup>H NMR of compound 13<sub>b</sub>

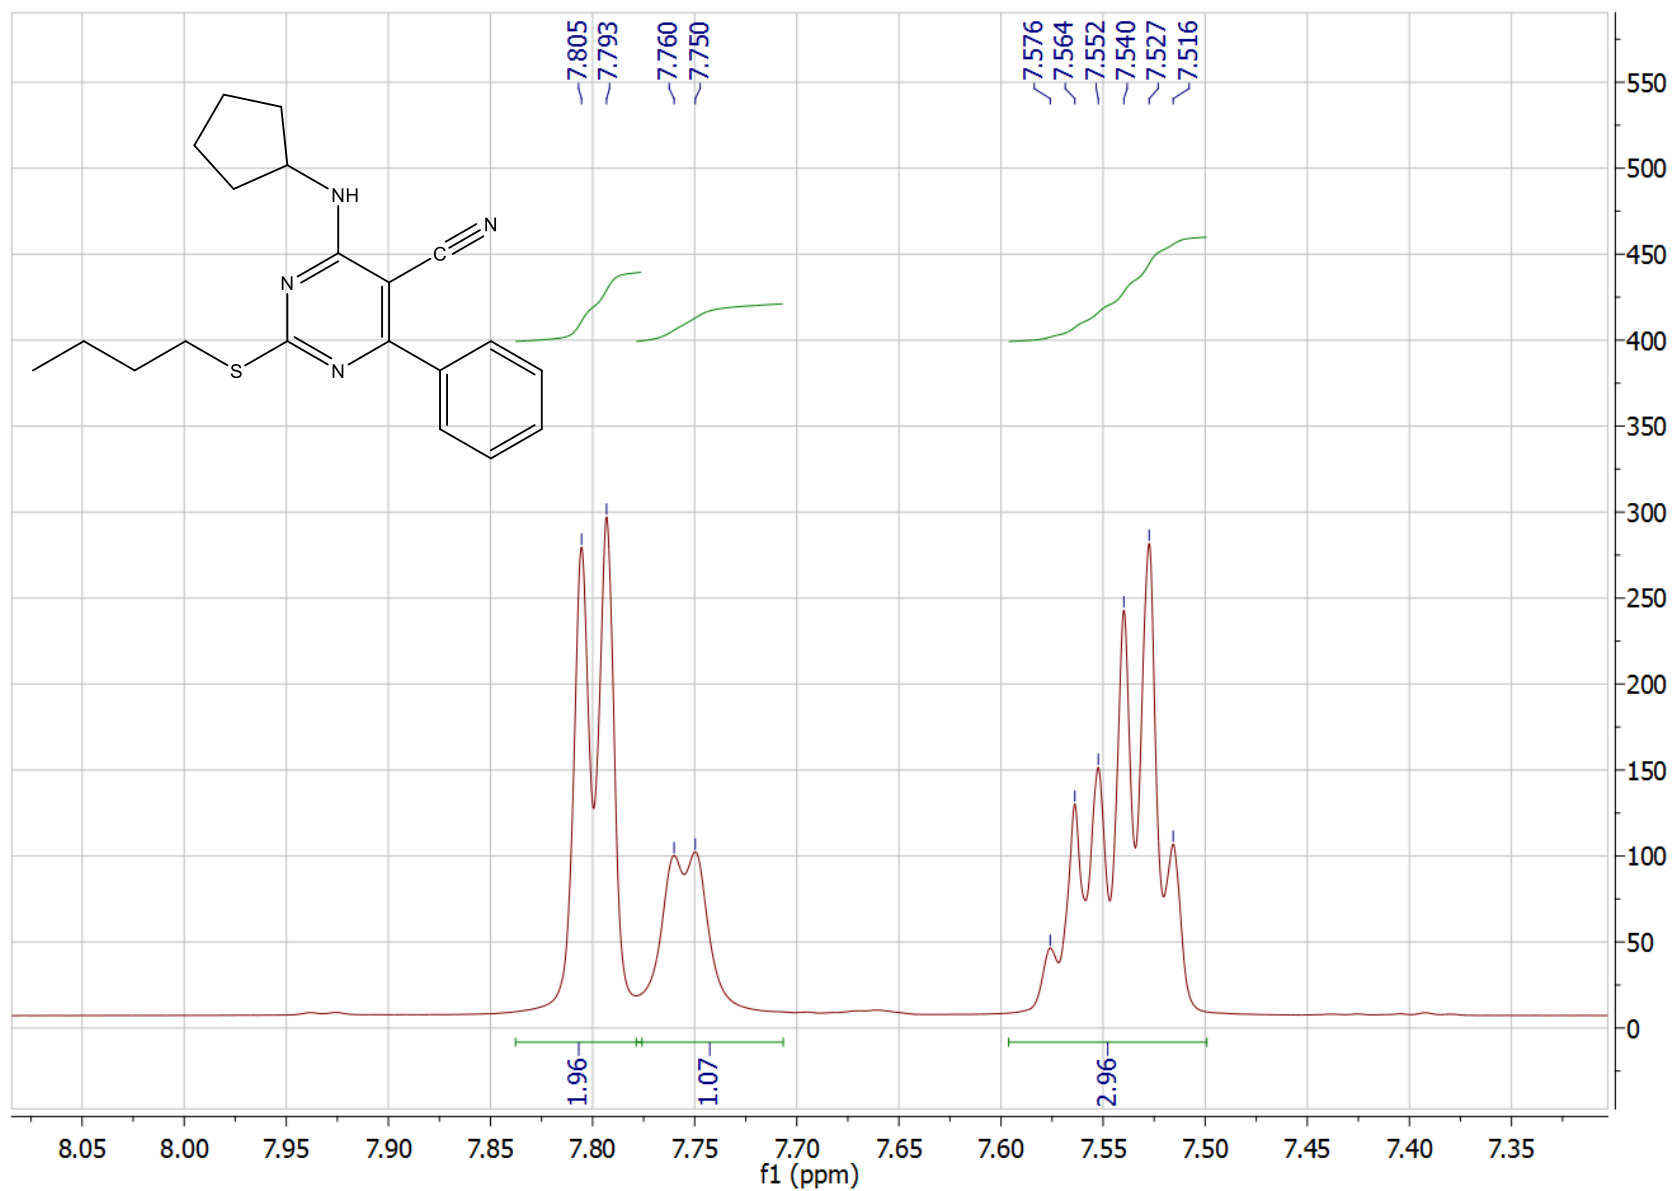

<sup>13</sup>C NMR of compound 13<sub>b</sub>

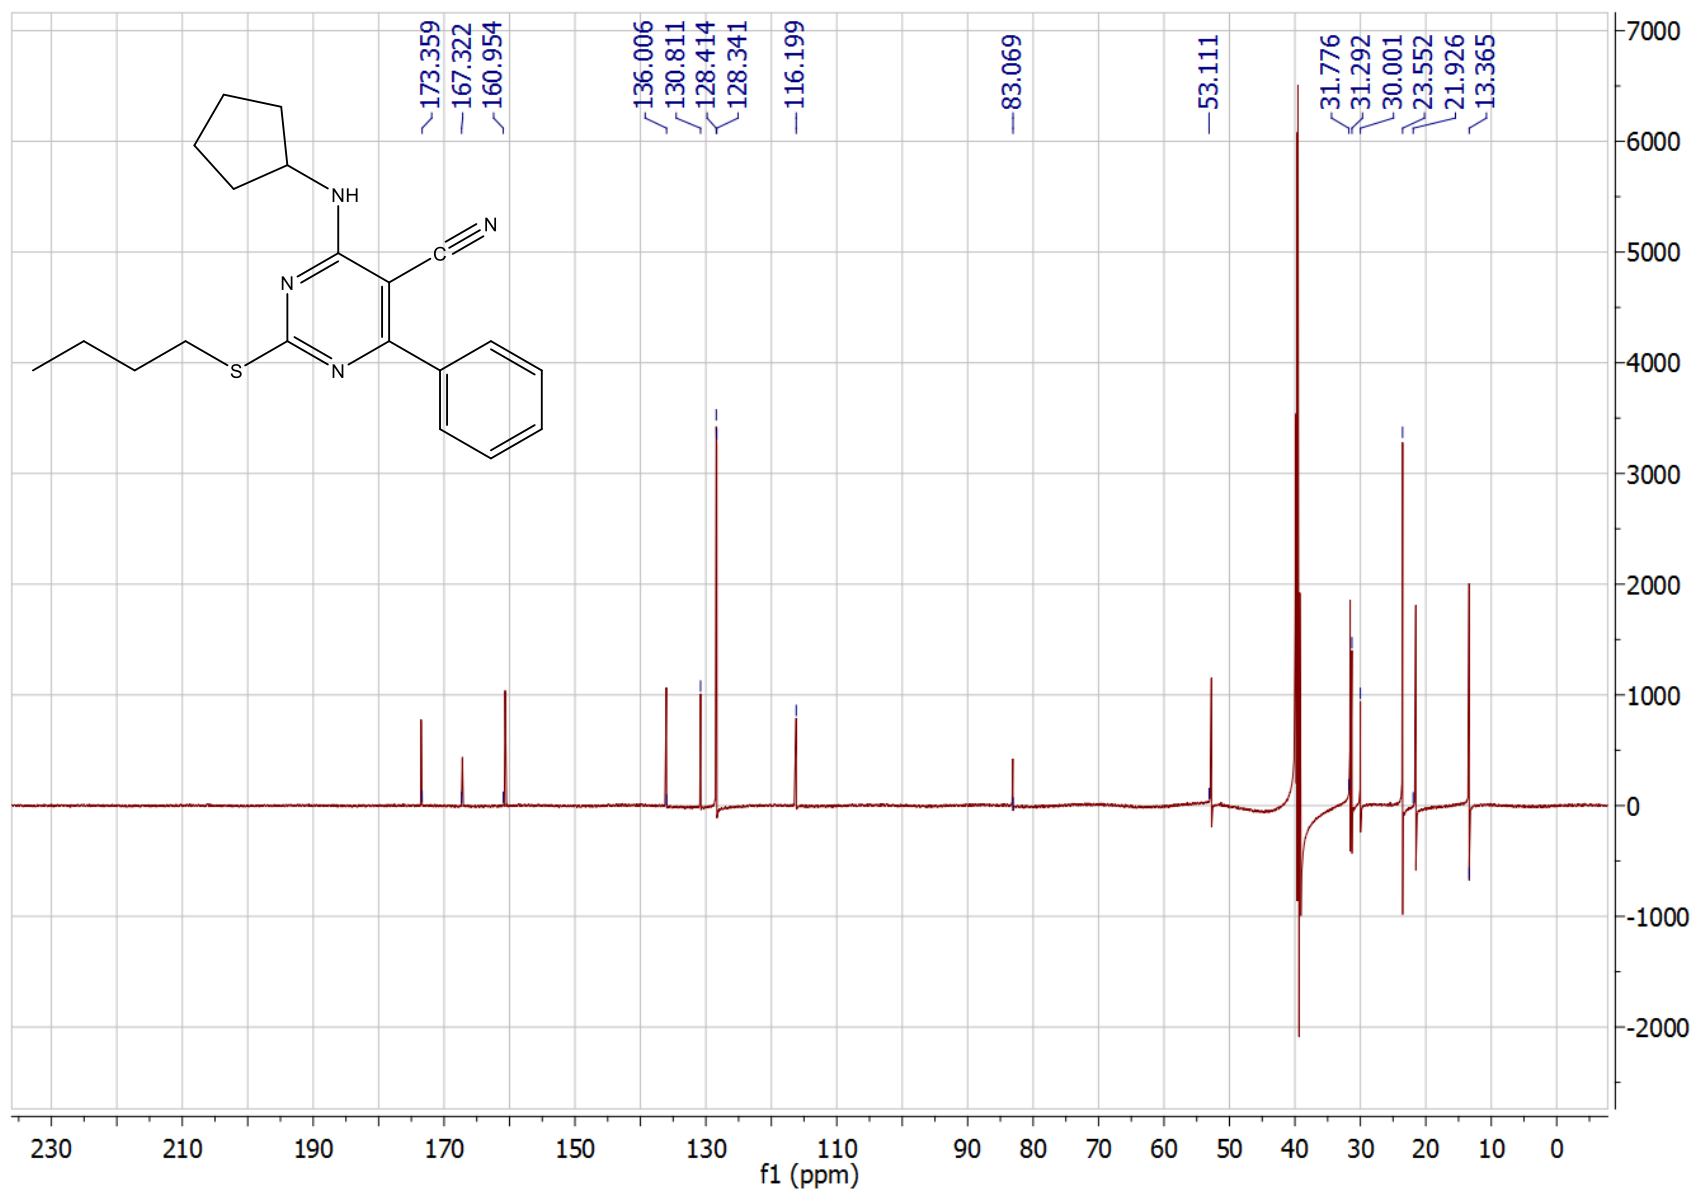

APT of compound 13<sub>b</sub>

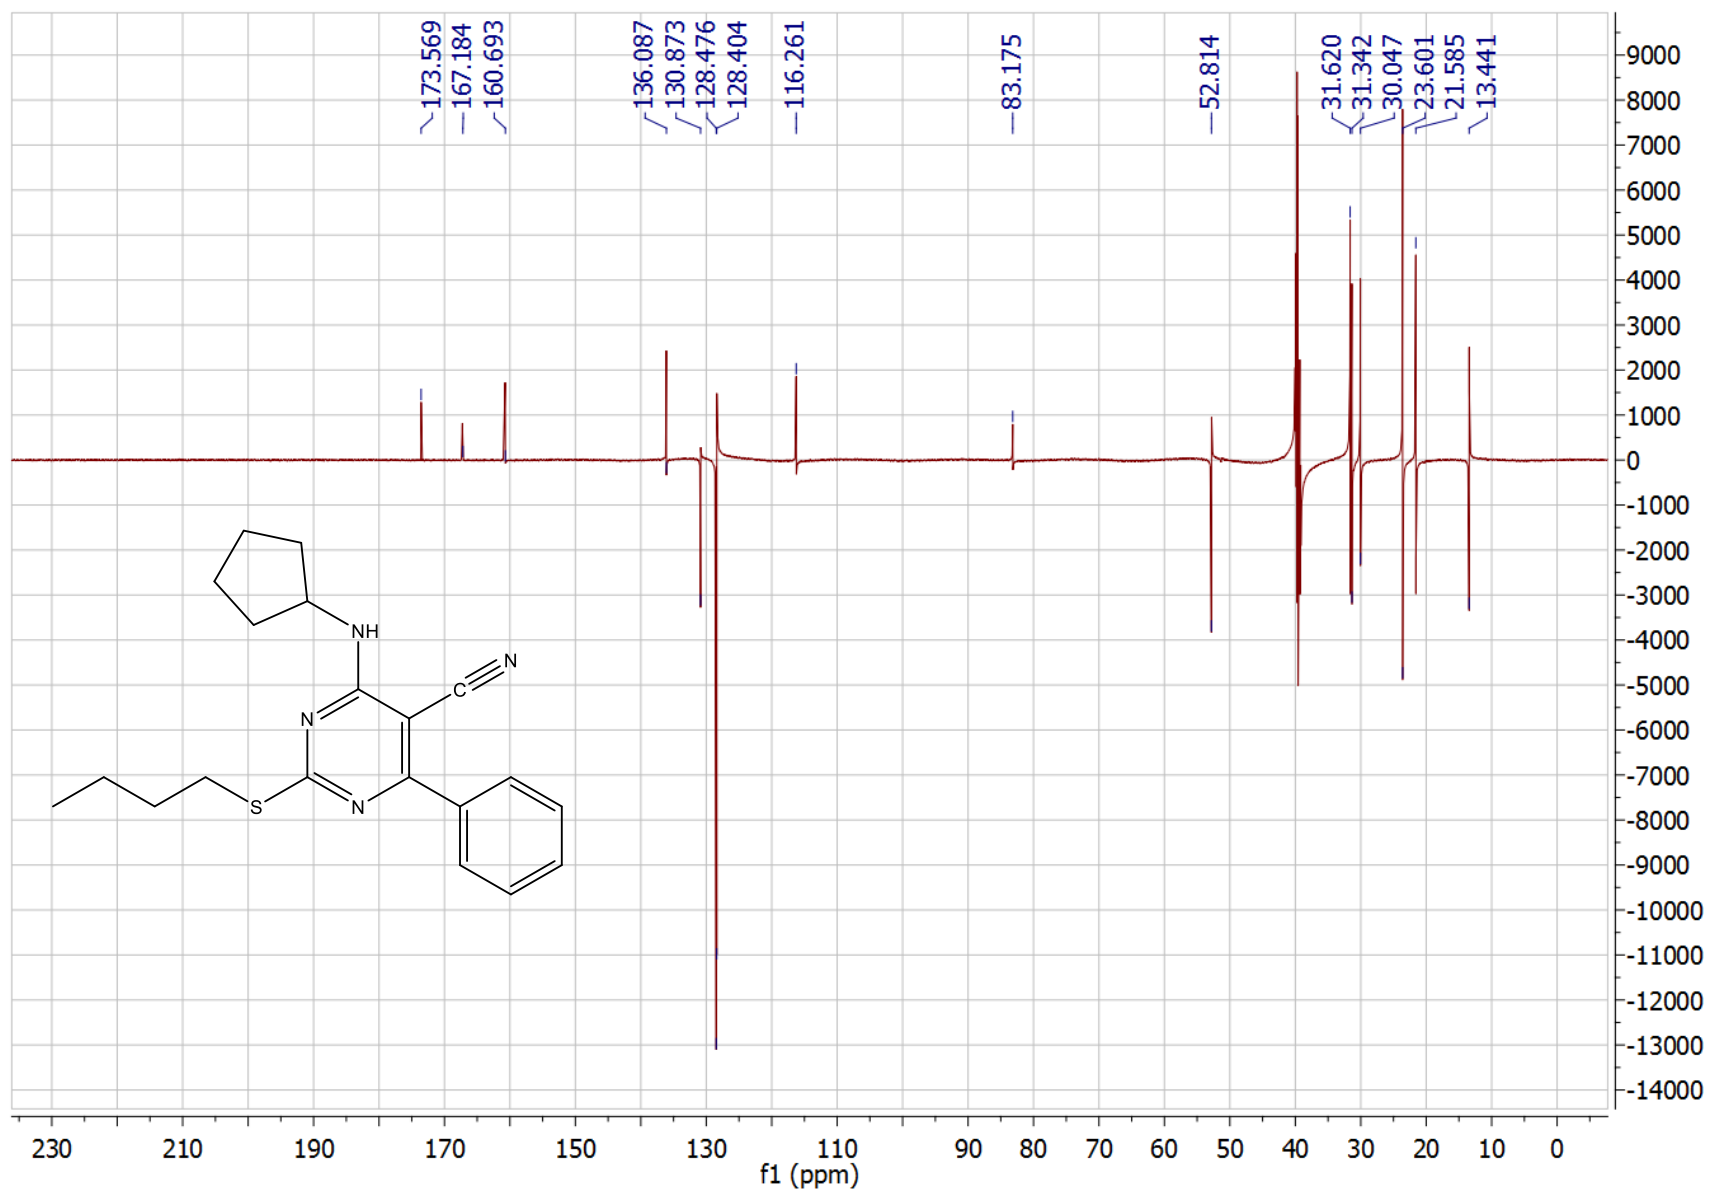



<sup>1</sup>H NMR of compound 14<sub>a</sub>

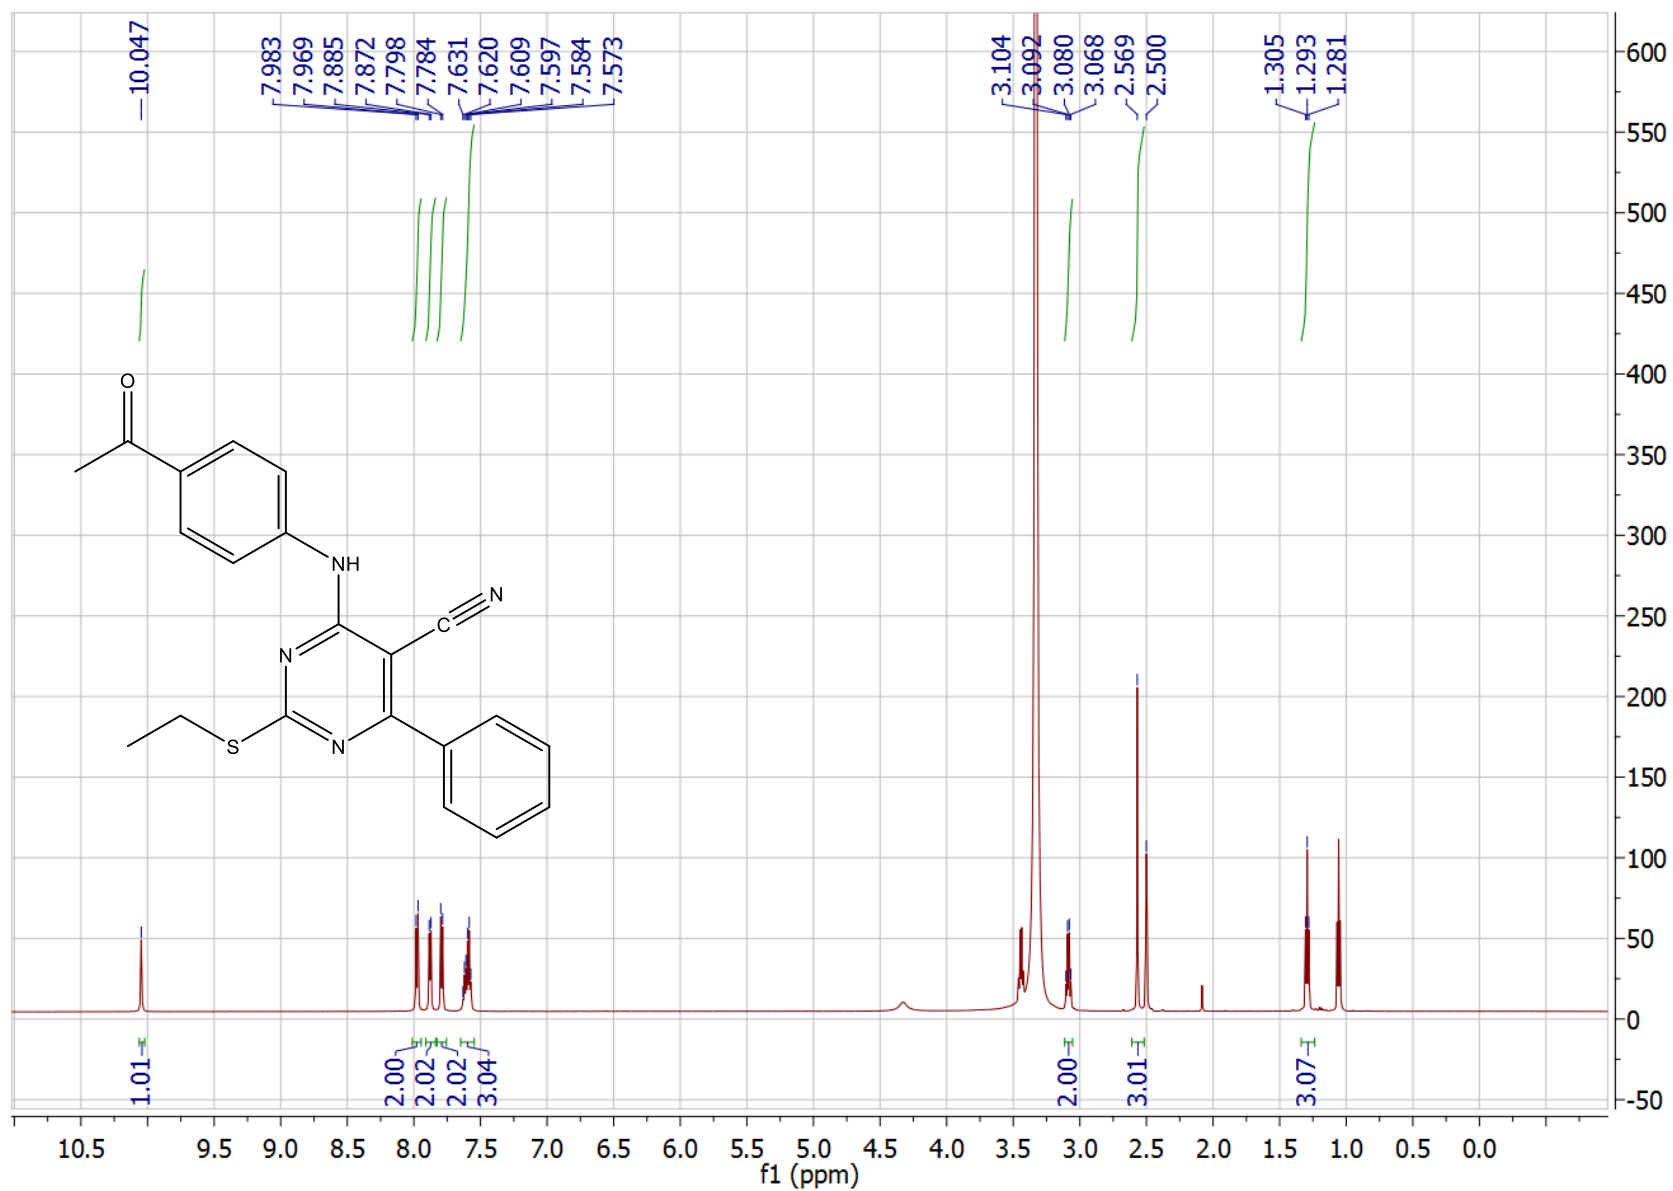

<sup>1</sup>H NMR of compound 14<sub>a</sub>

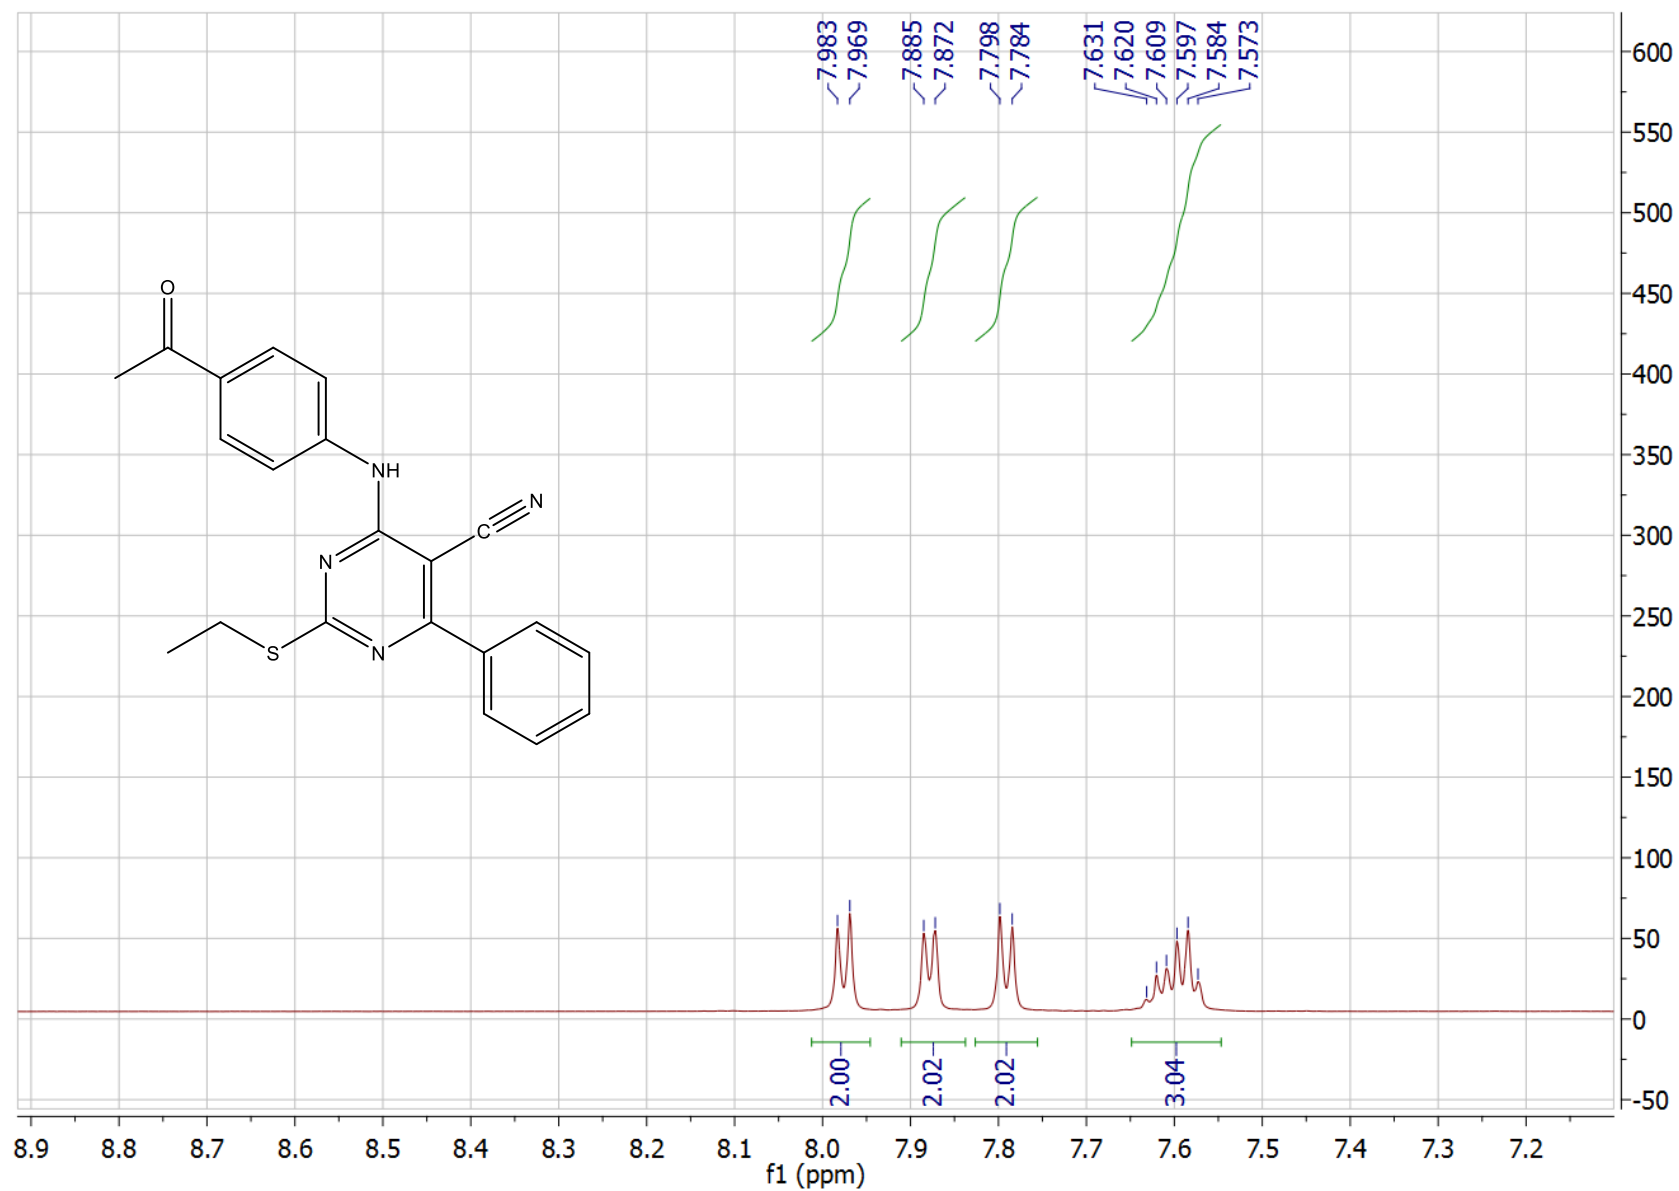

**$^{13}\text{C}$  NMR of compound 14<sub>a</sub>**

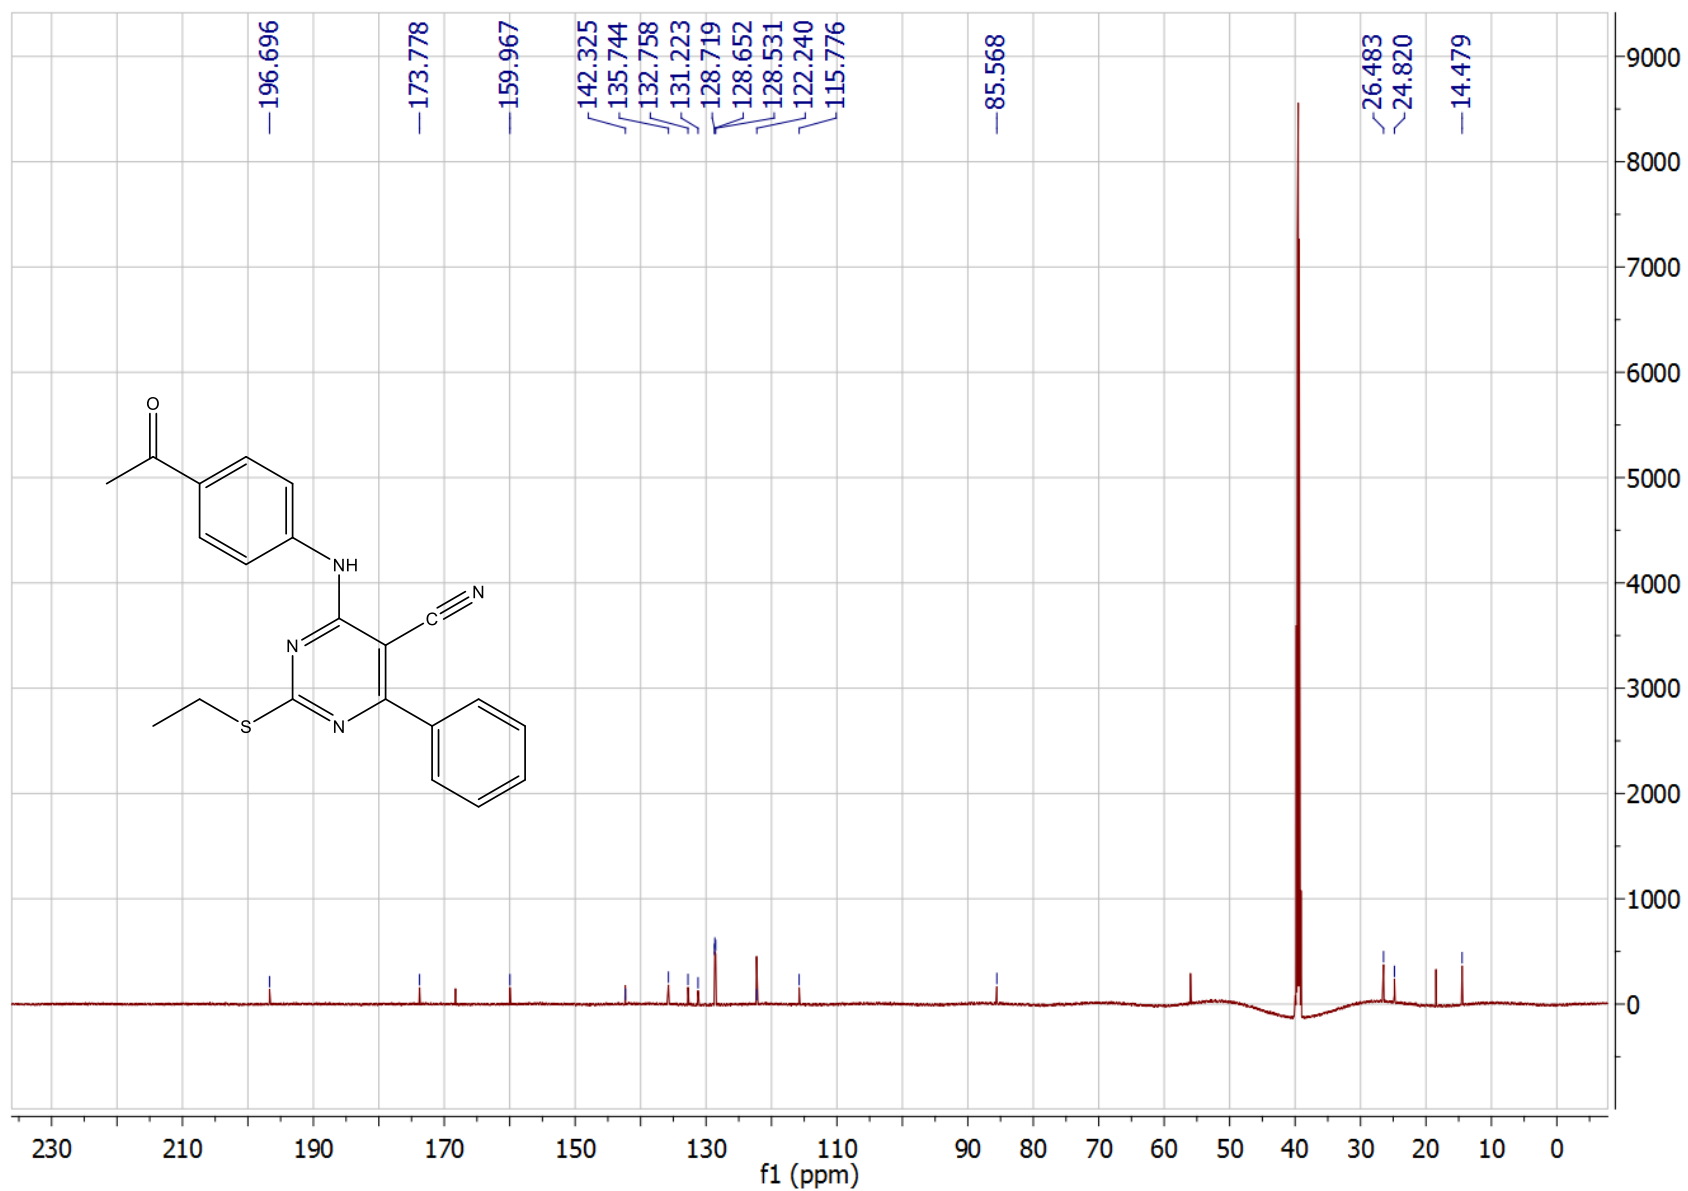

# APT of compound 14<sub>a</sub>

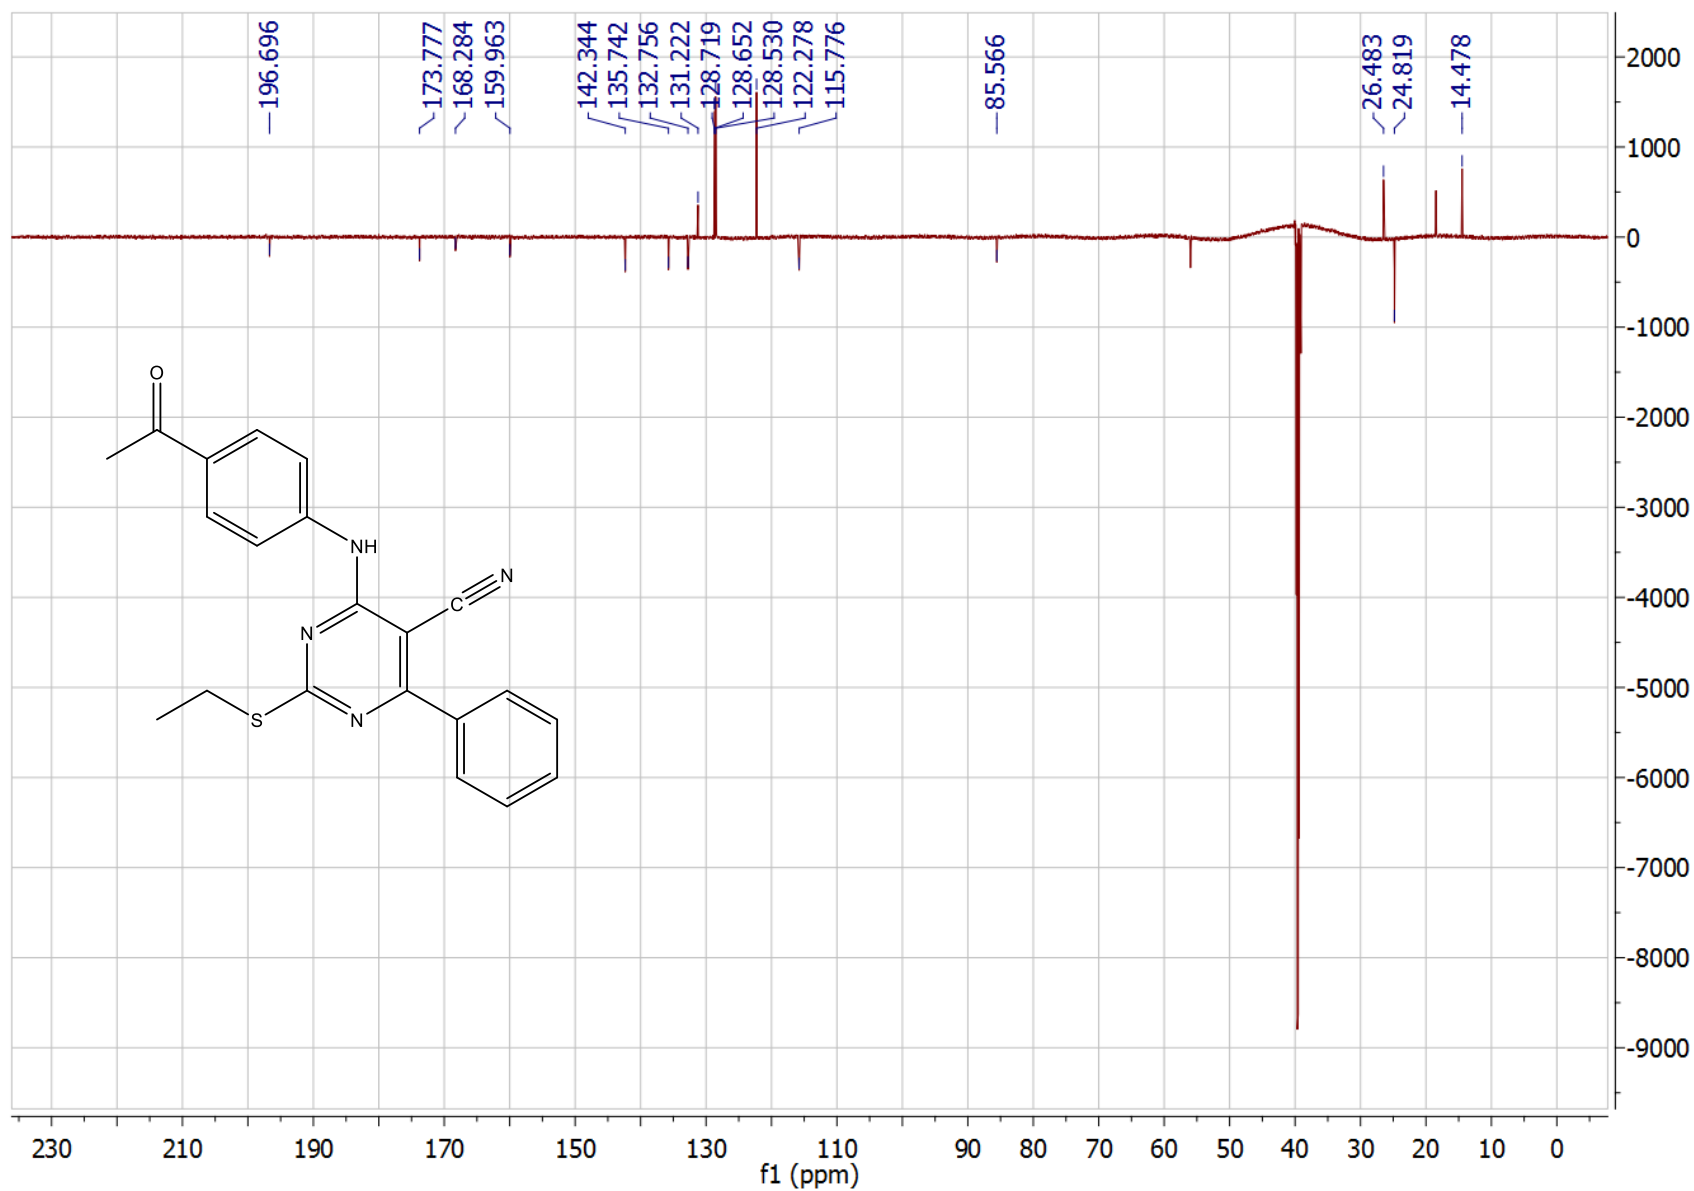

<sup>1</sup>H NMR of compound 14<sub>b</sub>

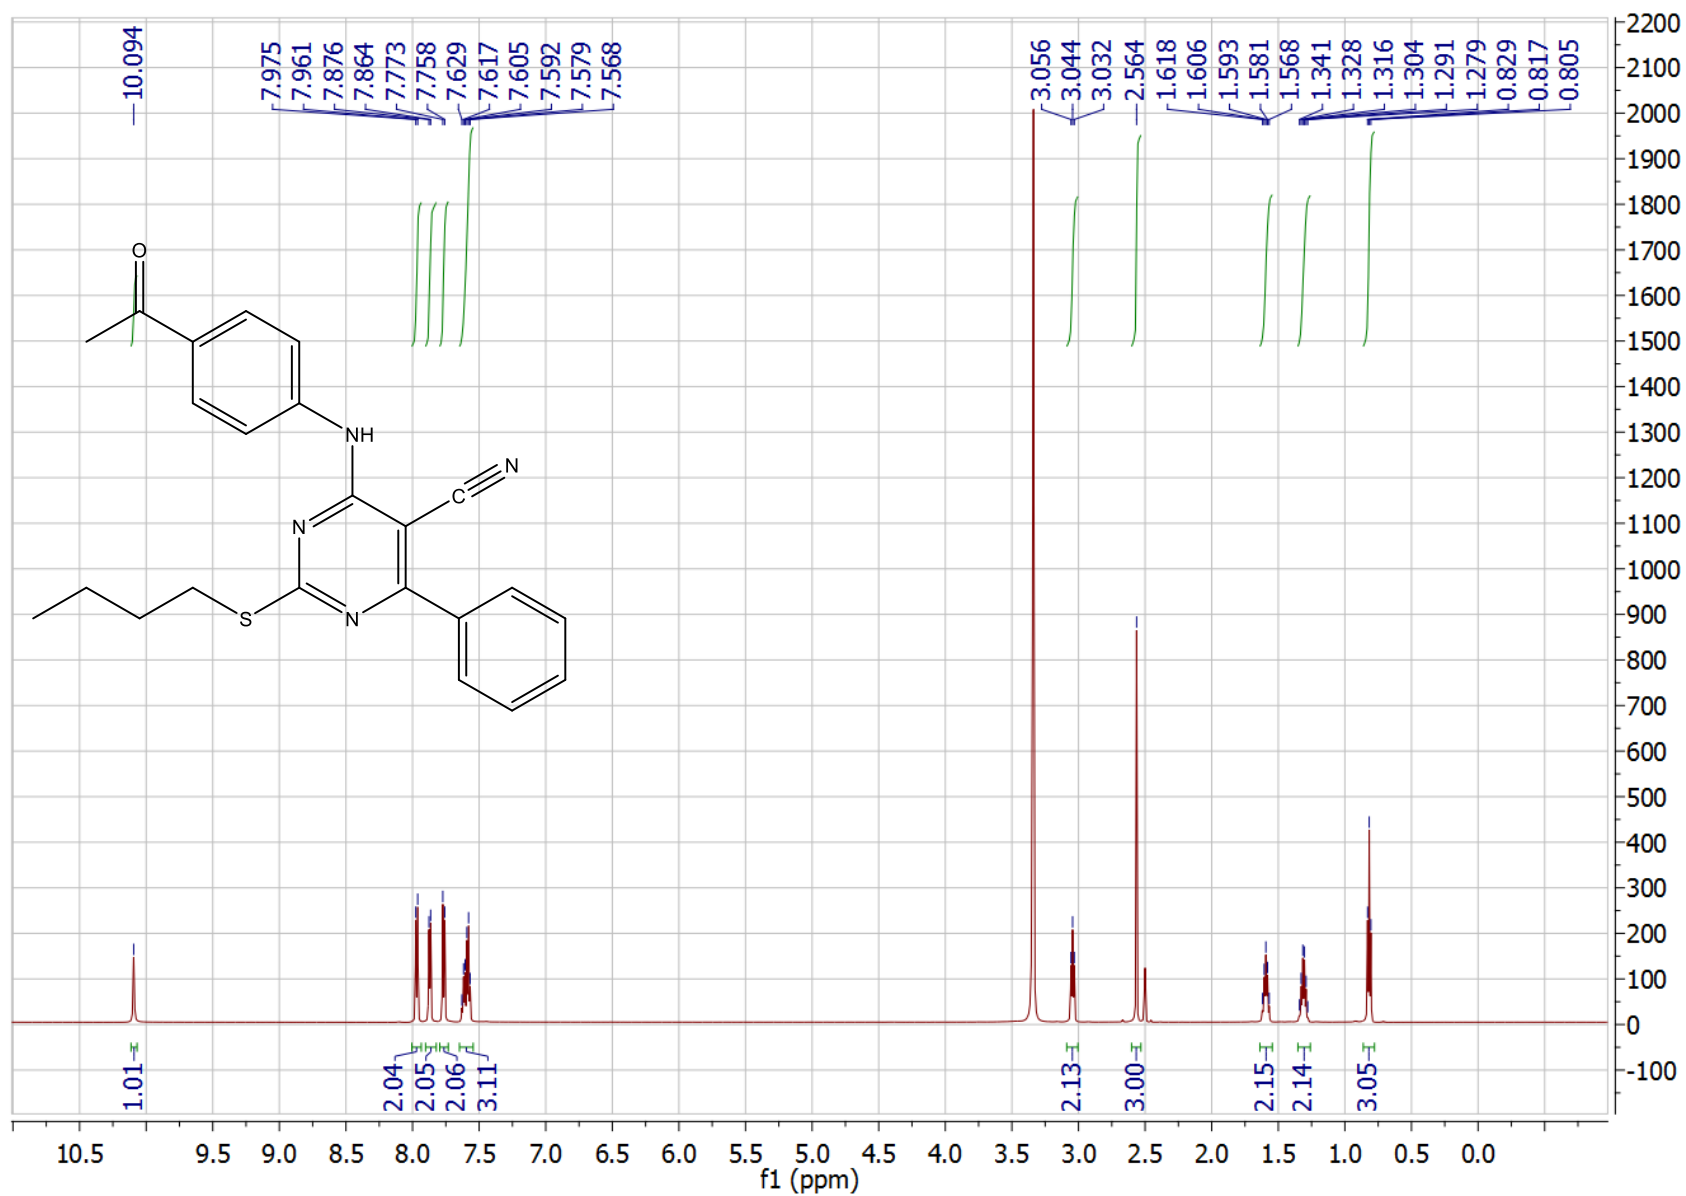

<sup>1</sup>H NMR of compound 14<sub>b</sub>

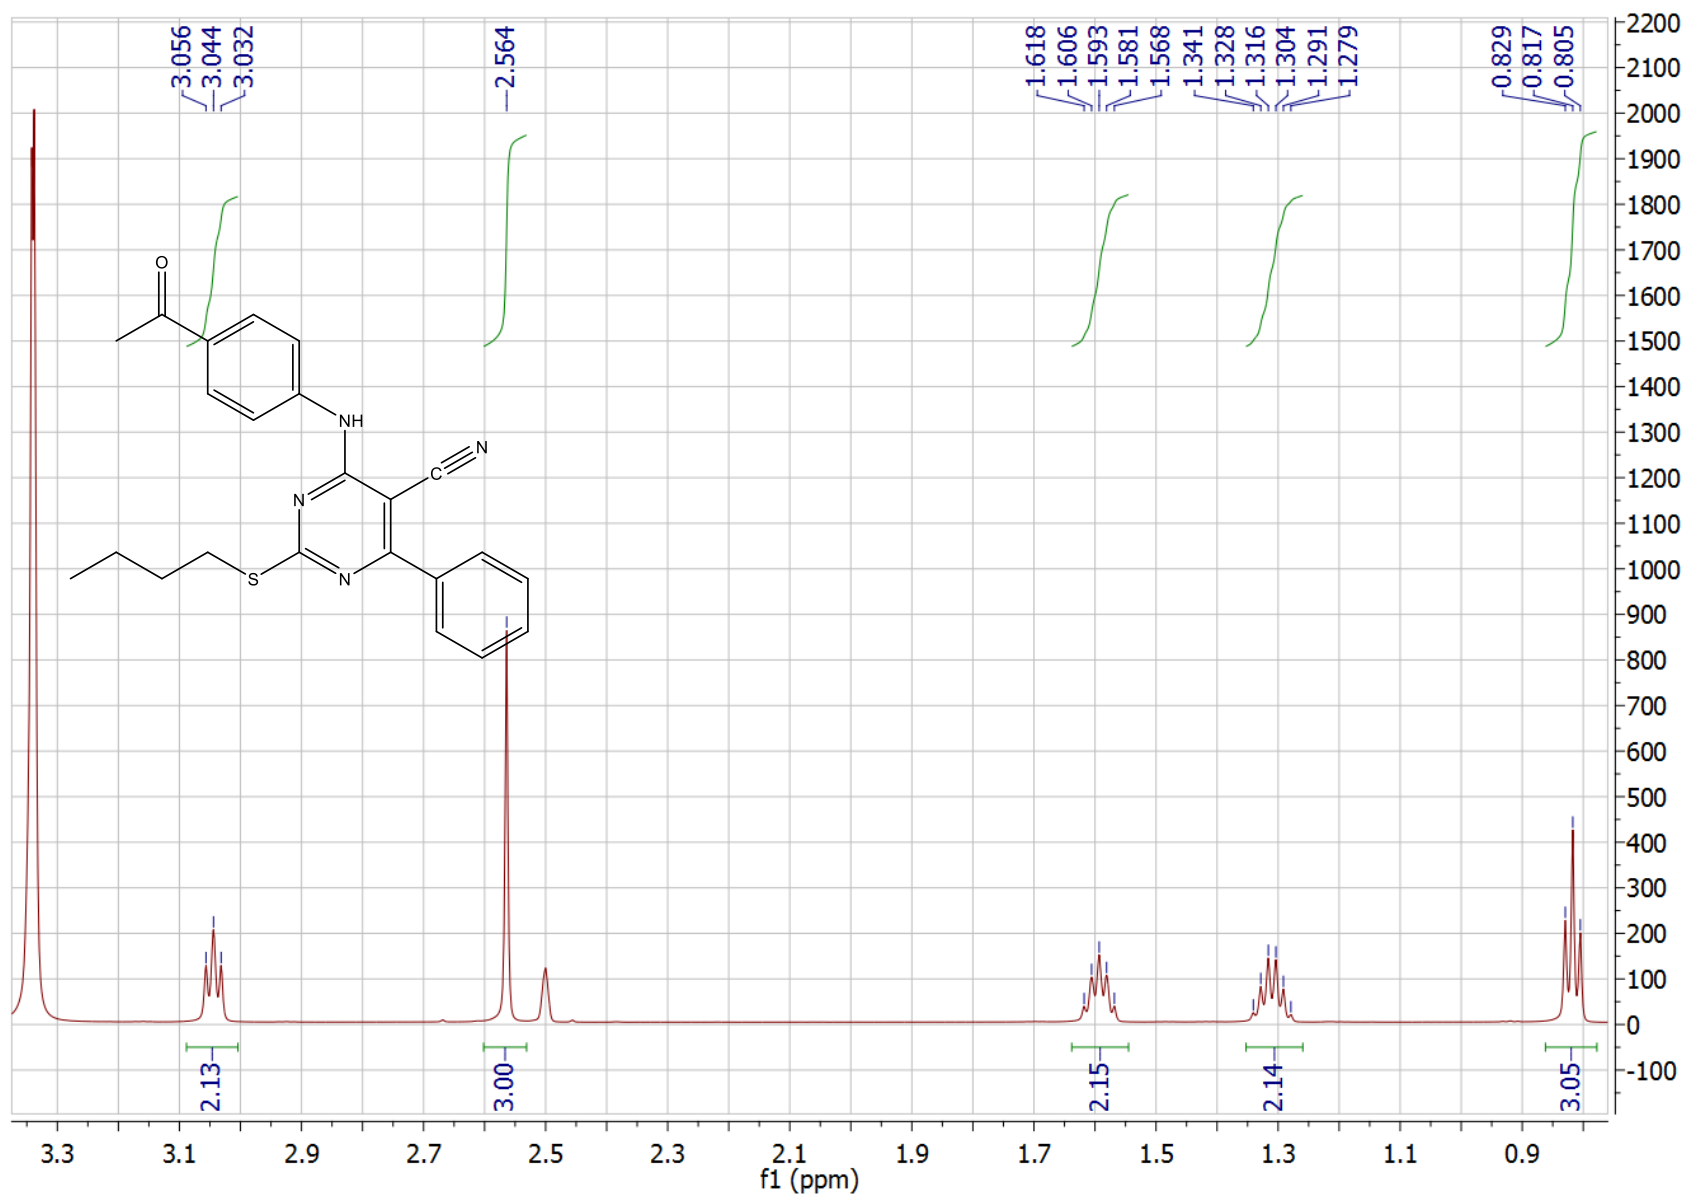

<sup>1</sup>H NMR of compound 14<sub>b</sub>

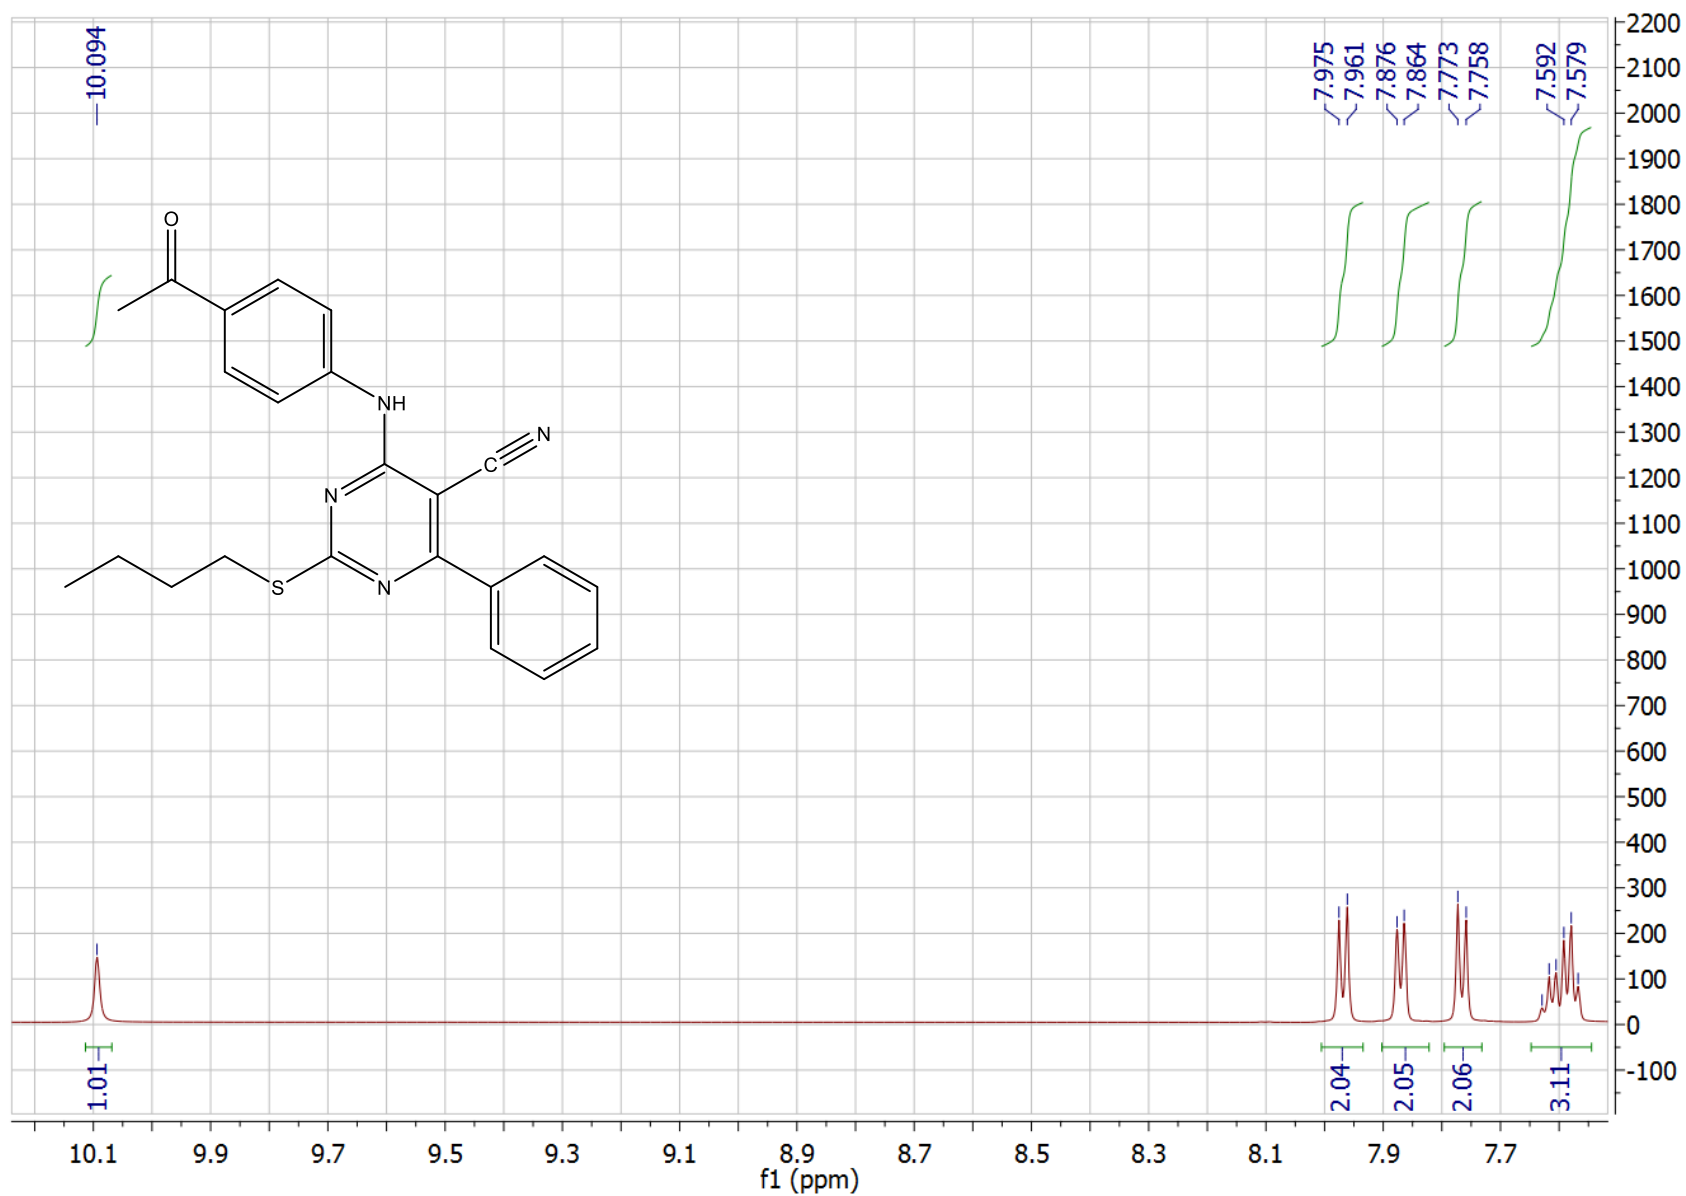

<sup>13</sup>C NMR of compound 14<sub>b</sub>

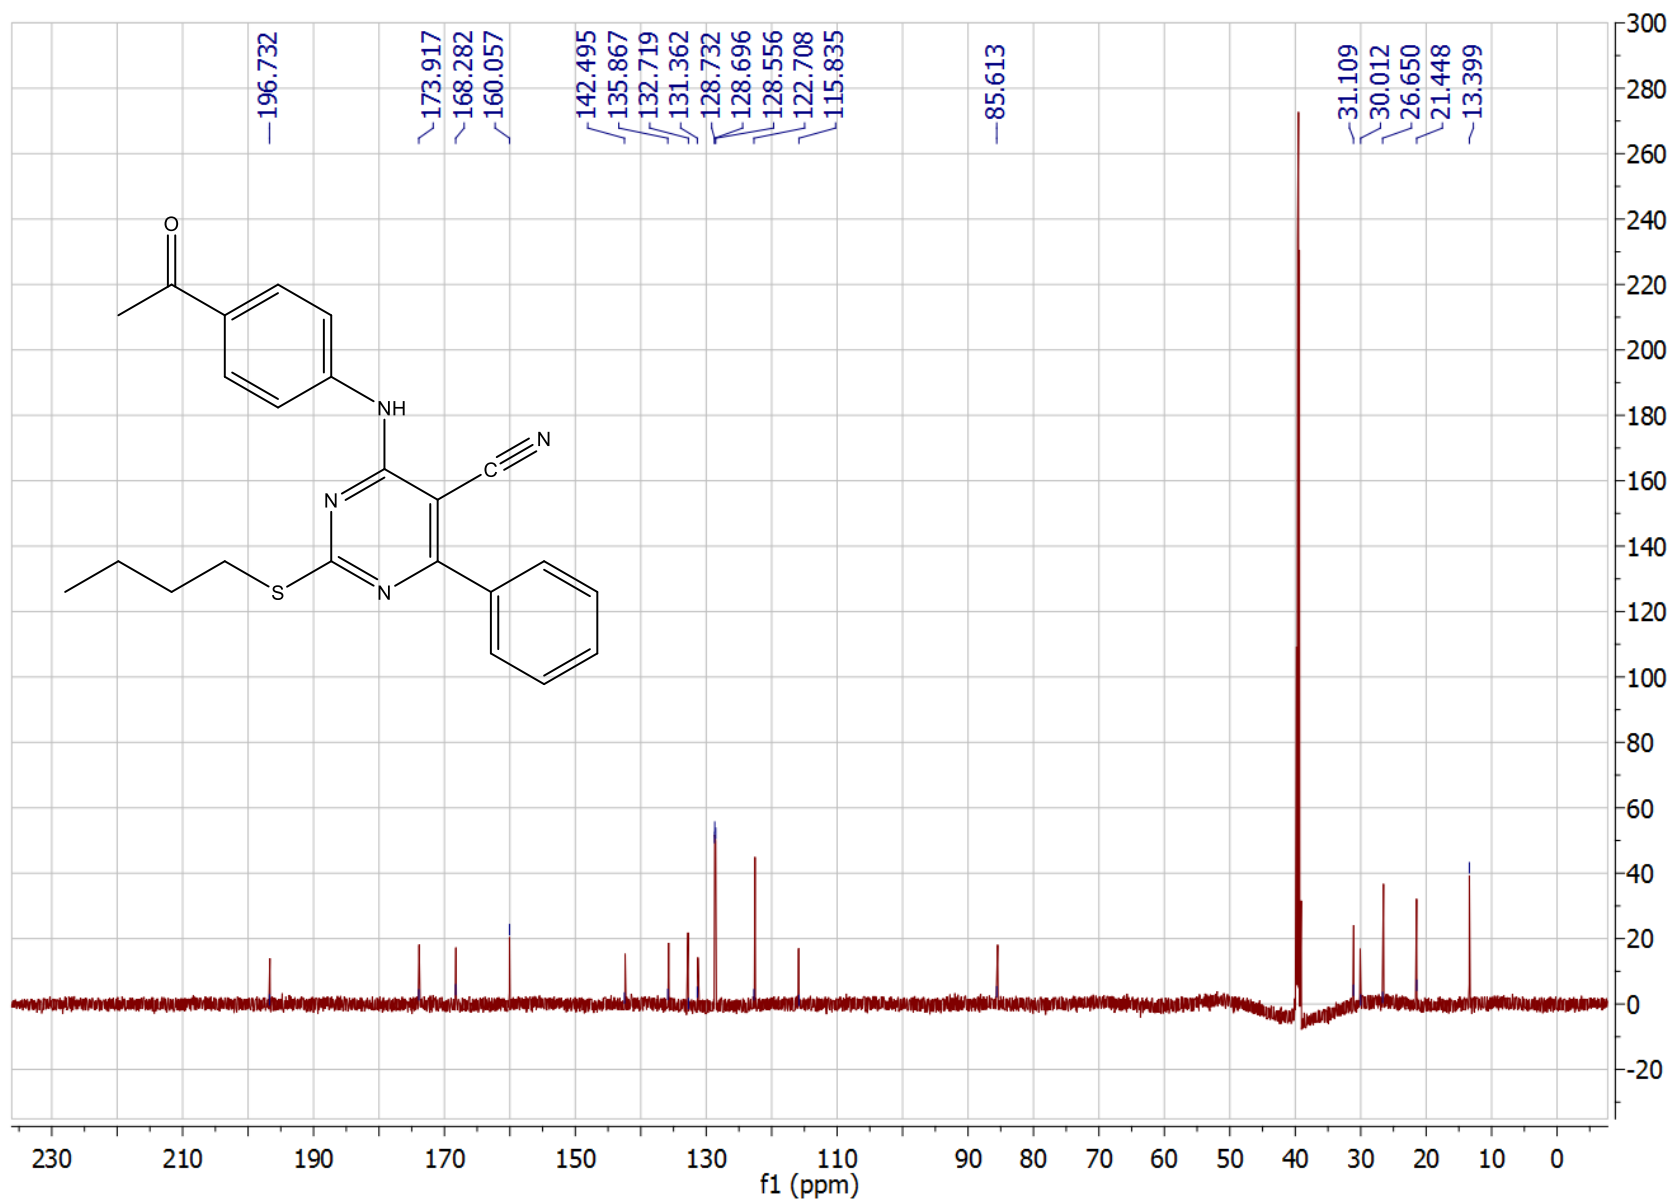



APT of compound 14<sub>b</sub>

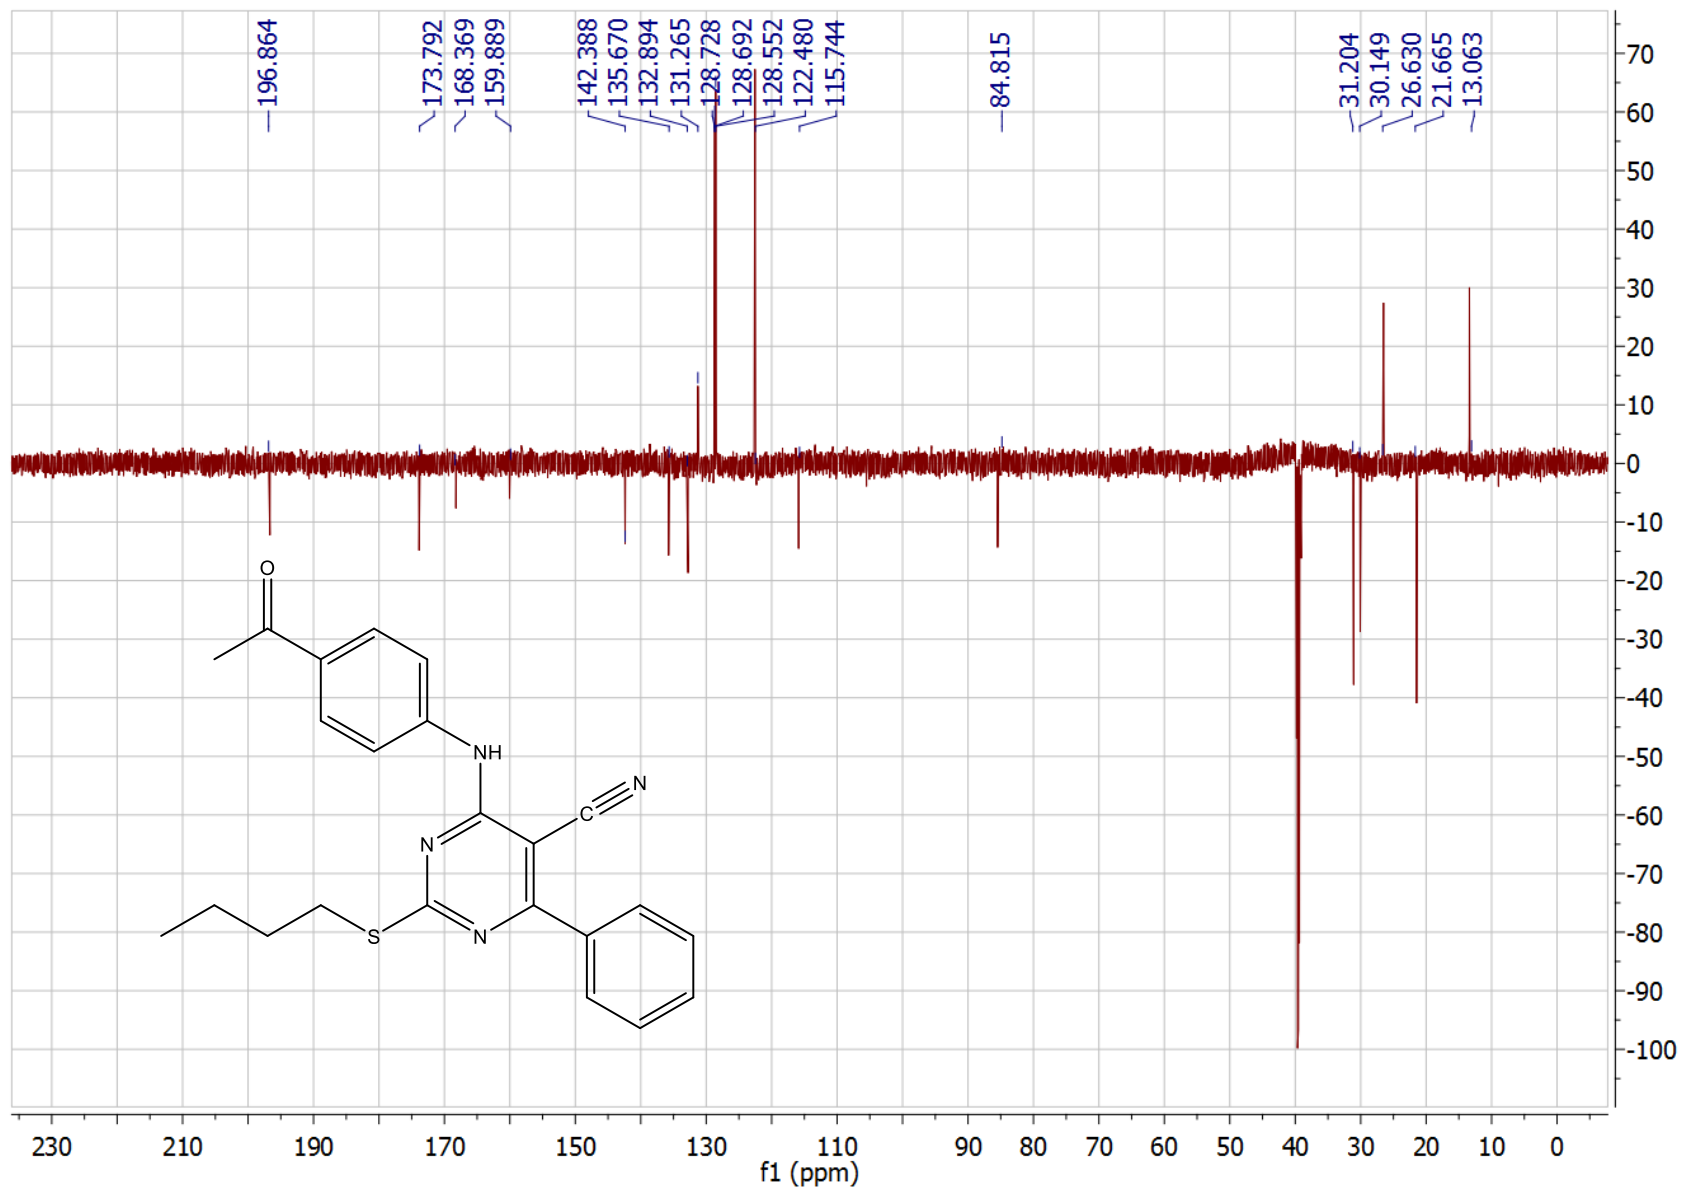

<sup>1</sup>H NMR of compound 15<sub>a</sub>

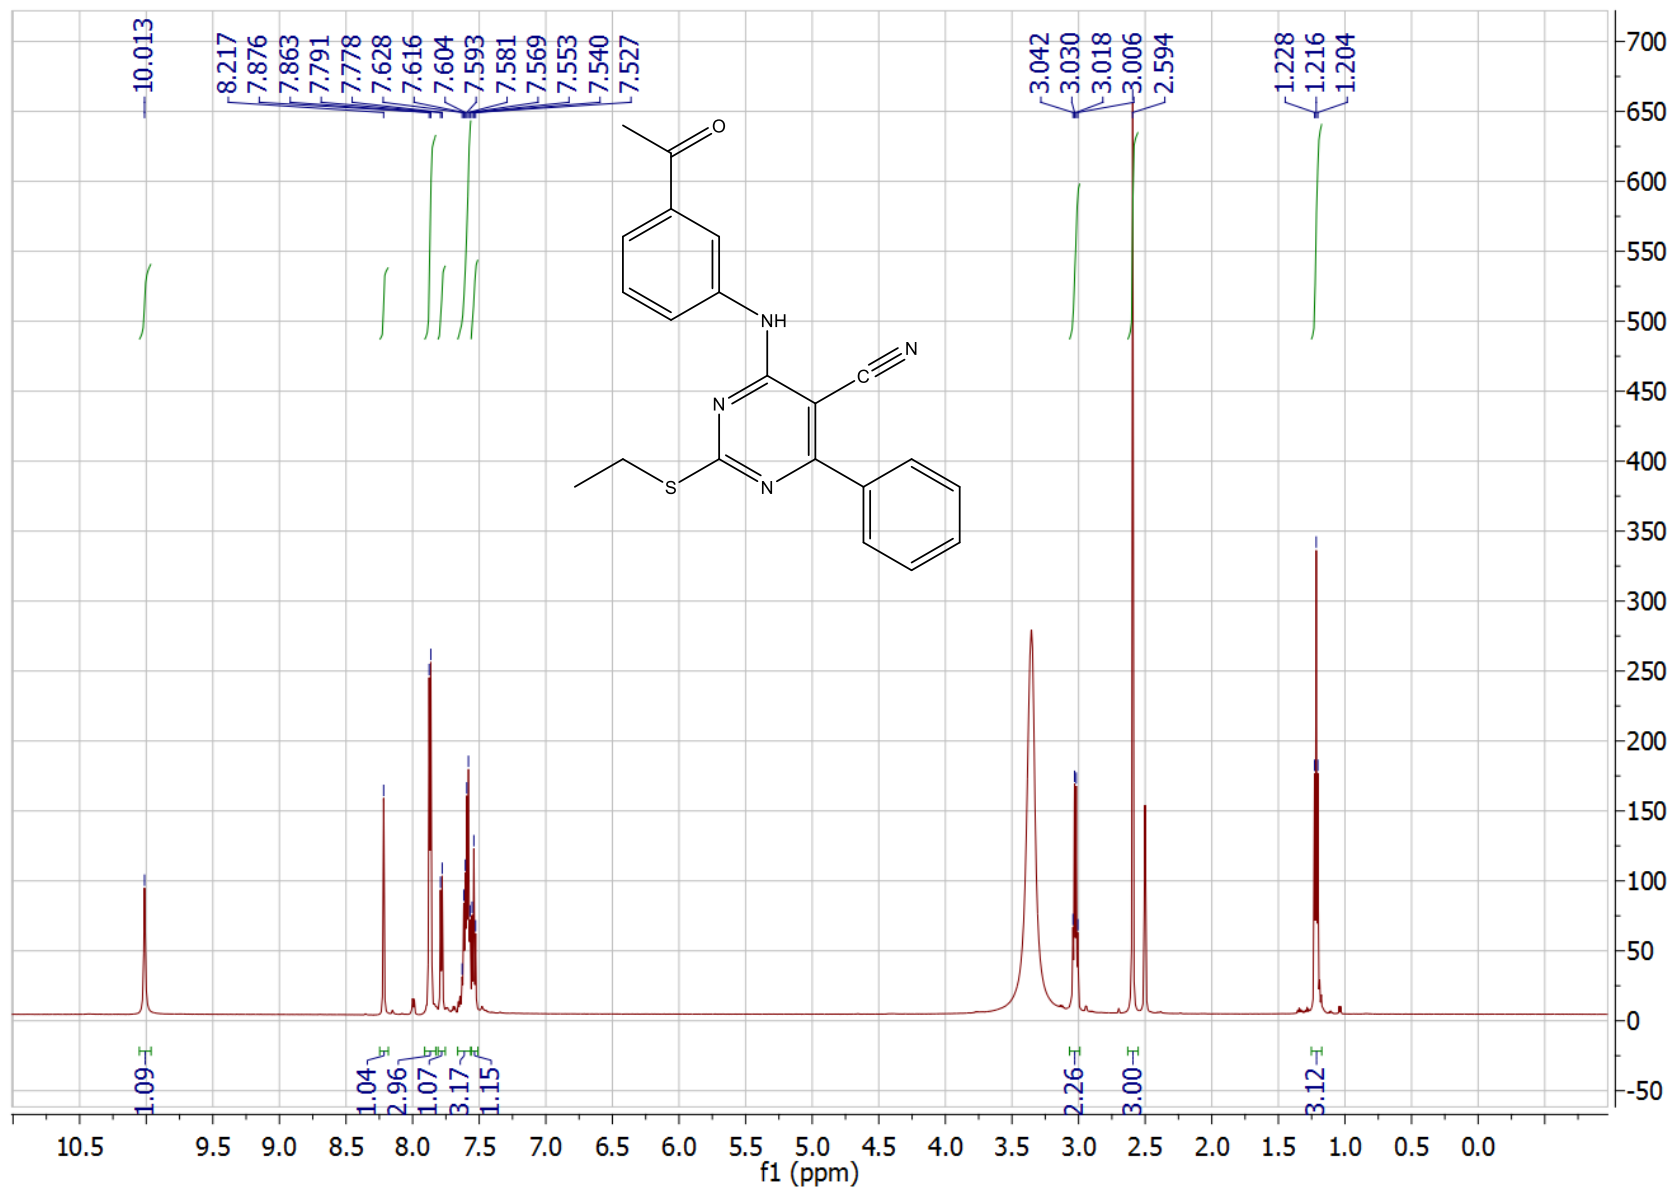

<sup>1</sup>H NMR of compound 15<sub>a</sub>

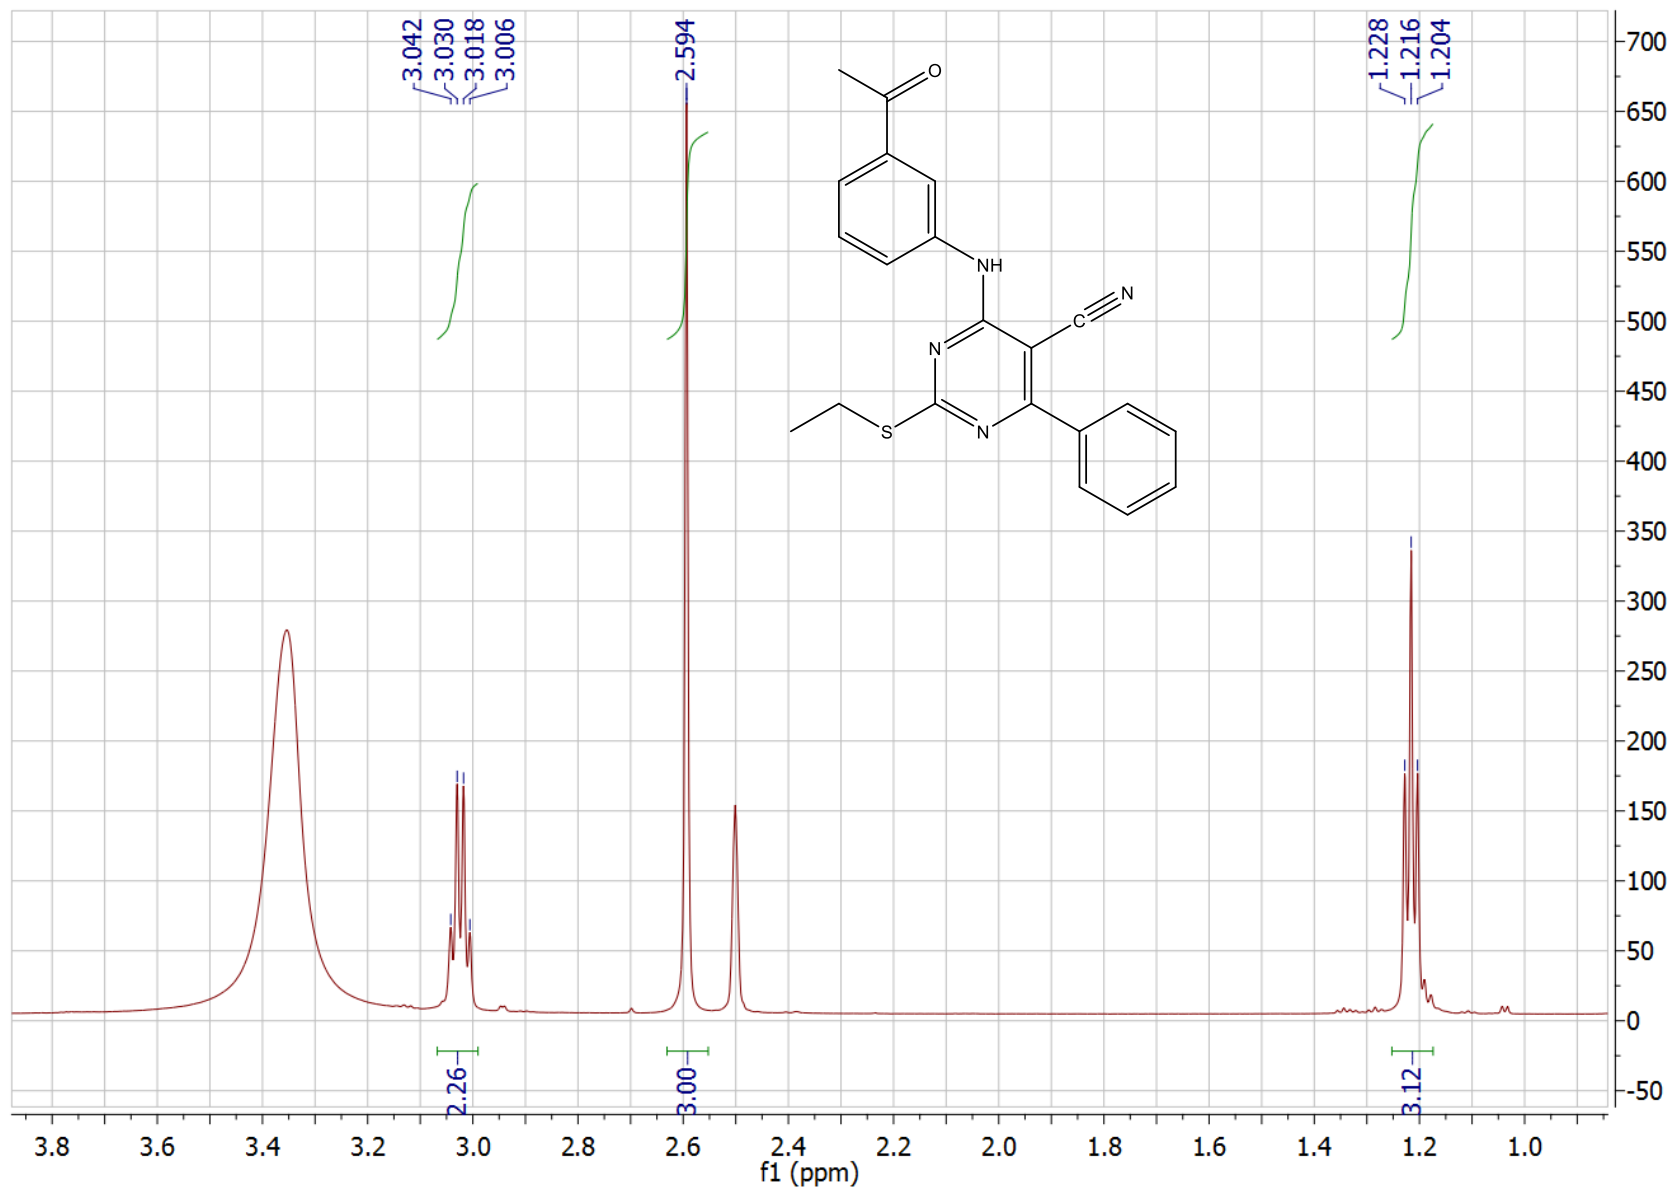

<sup>1</sup>H NMR of compound 15<sub>a</sub>

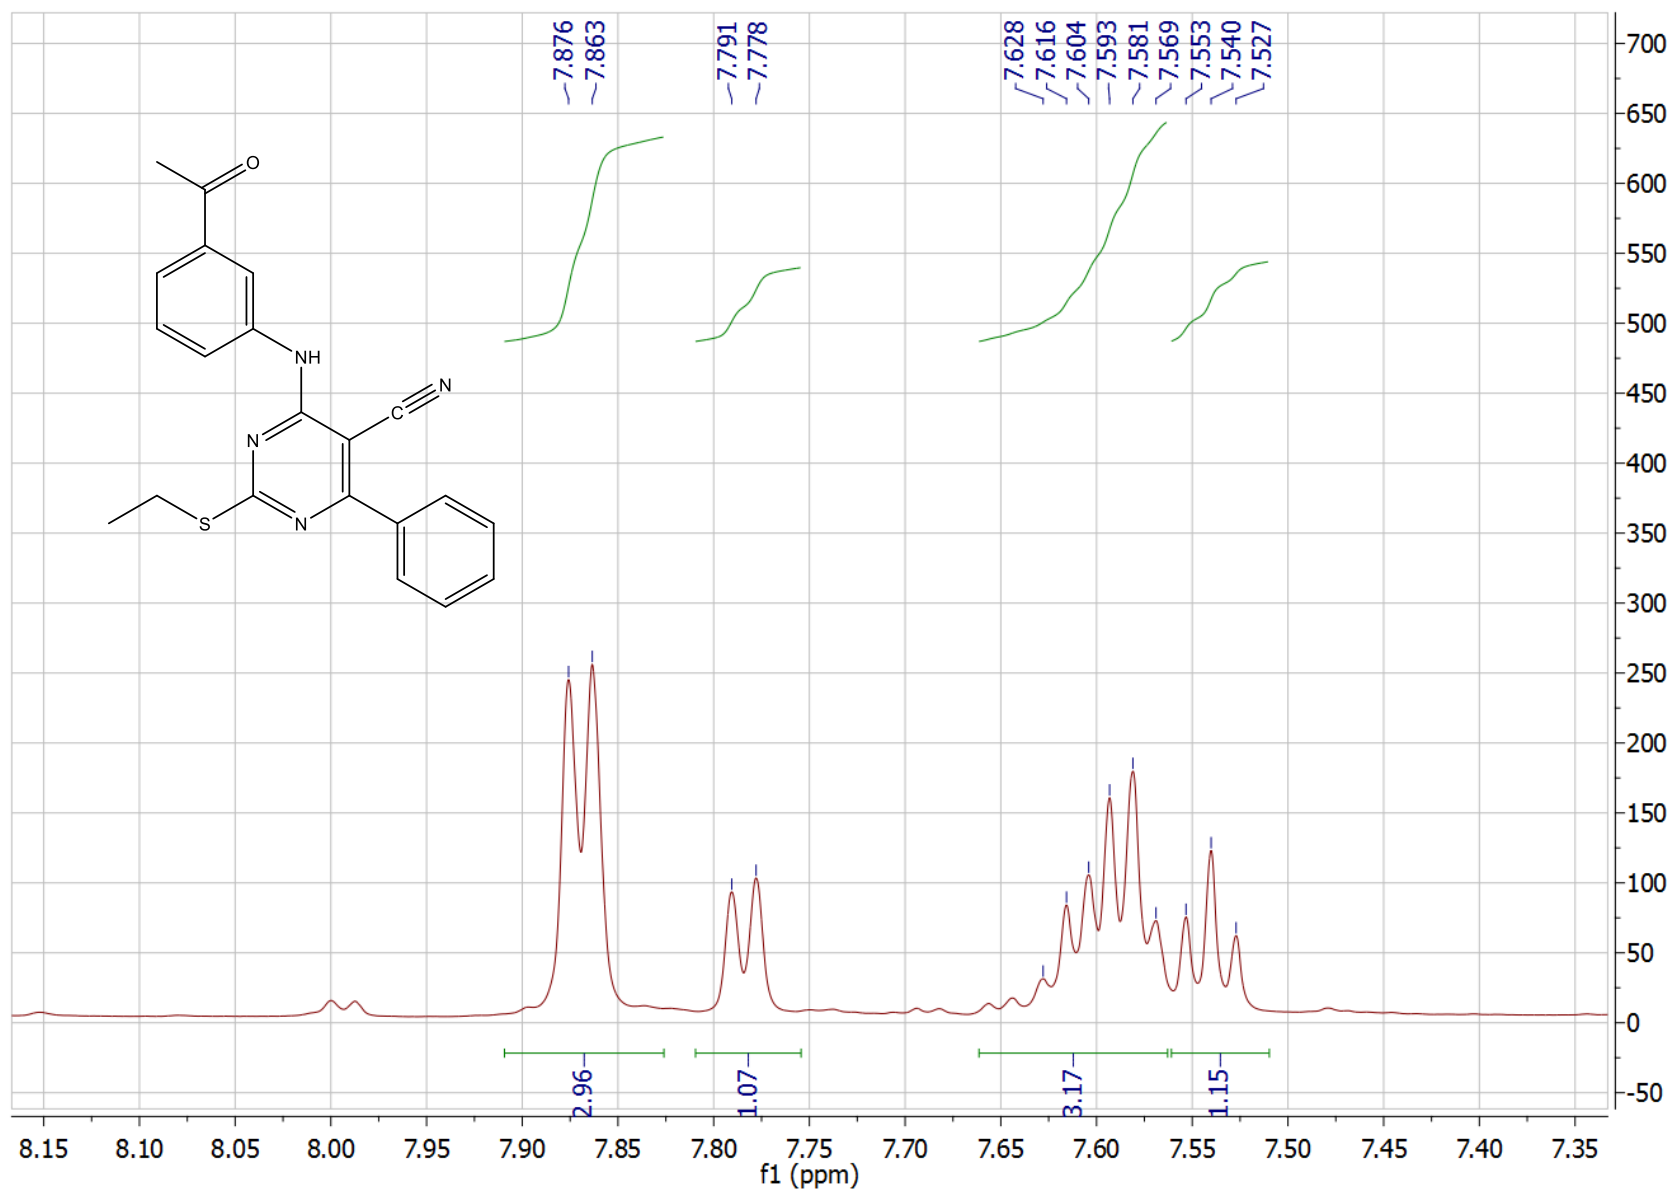

<sup>13</sup>C NMR of compound 15<sub>a</sub>

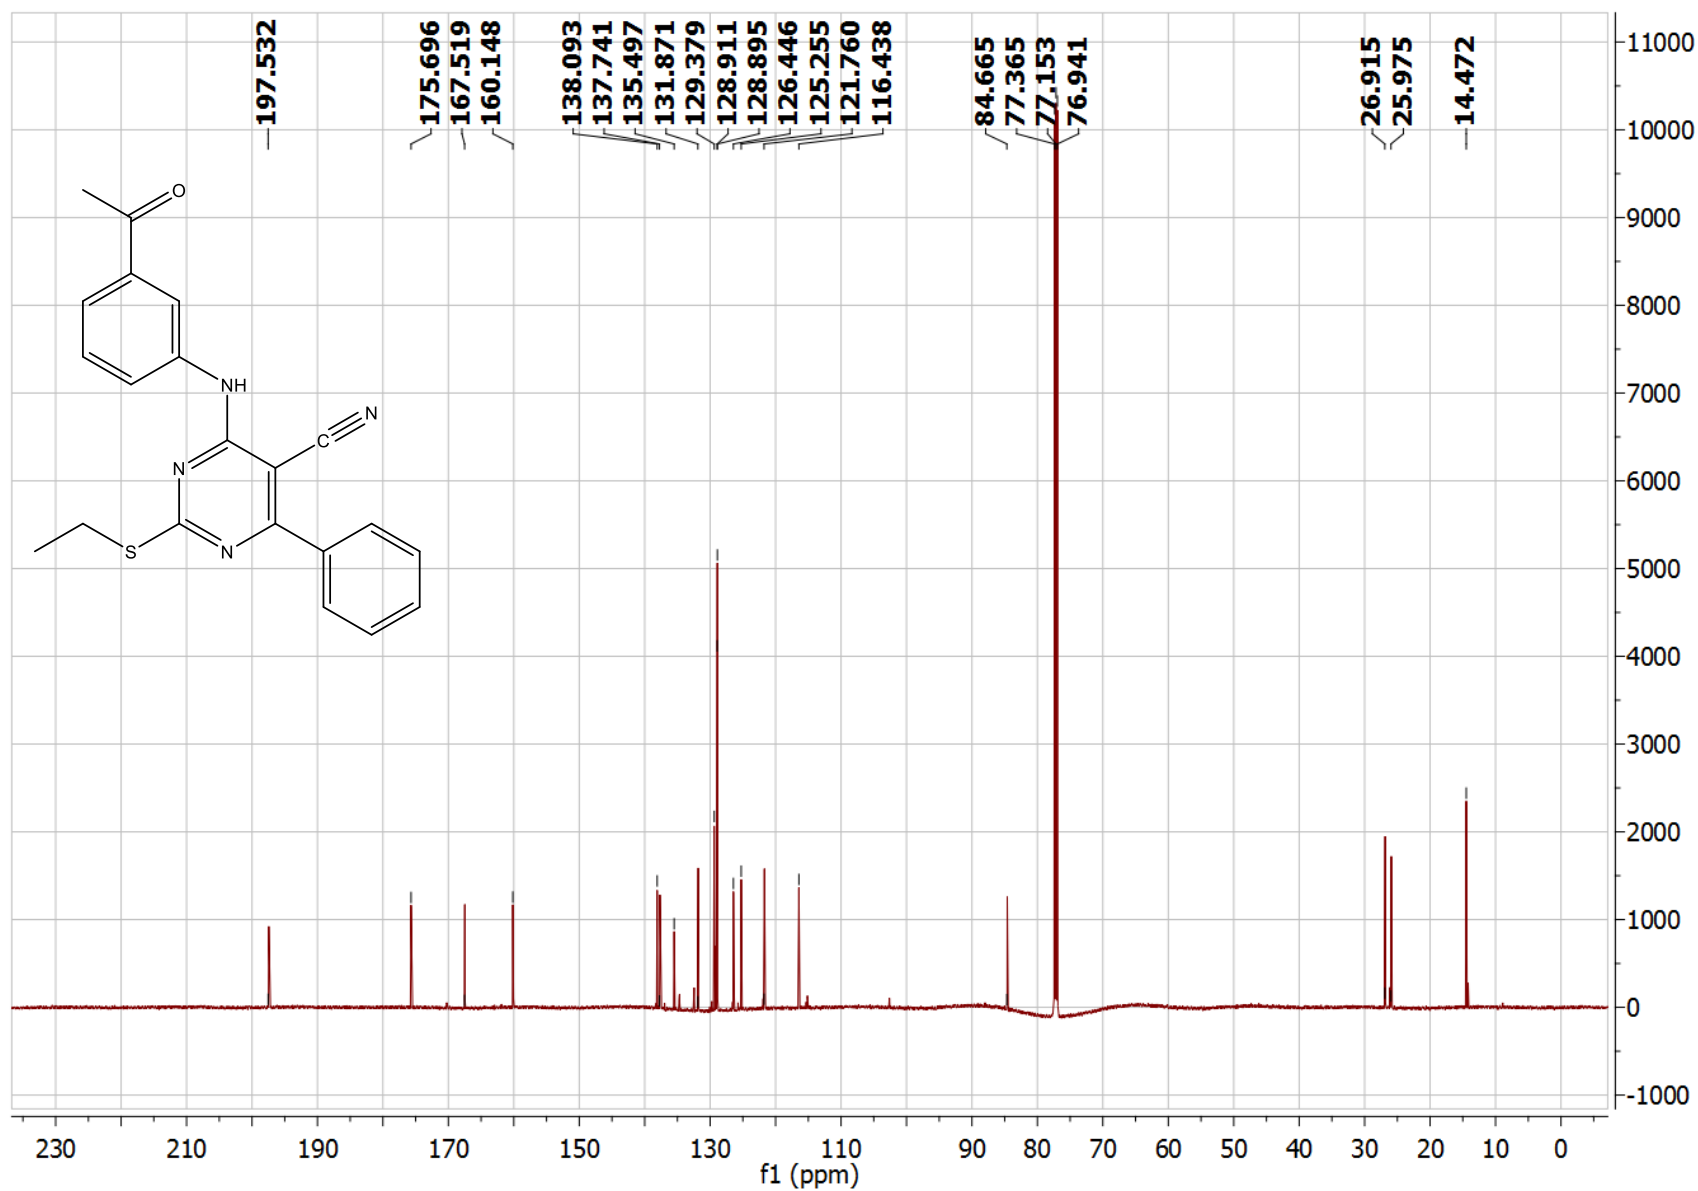

<sup>13</sup>C NMR of compound 15<sub>a</sub>

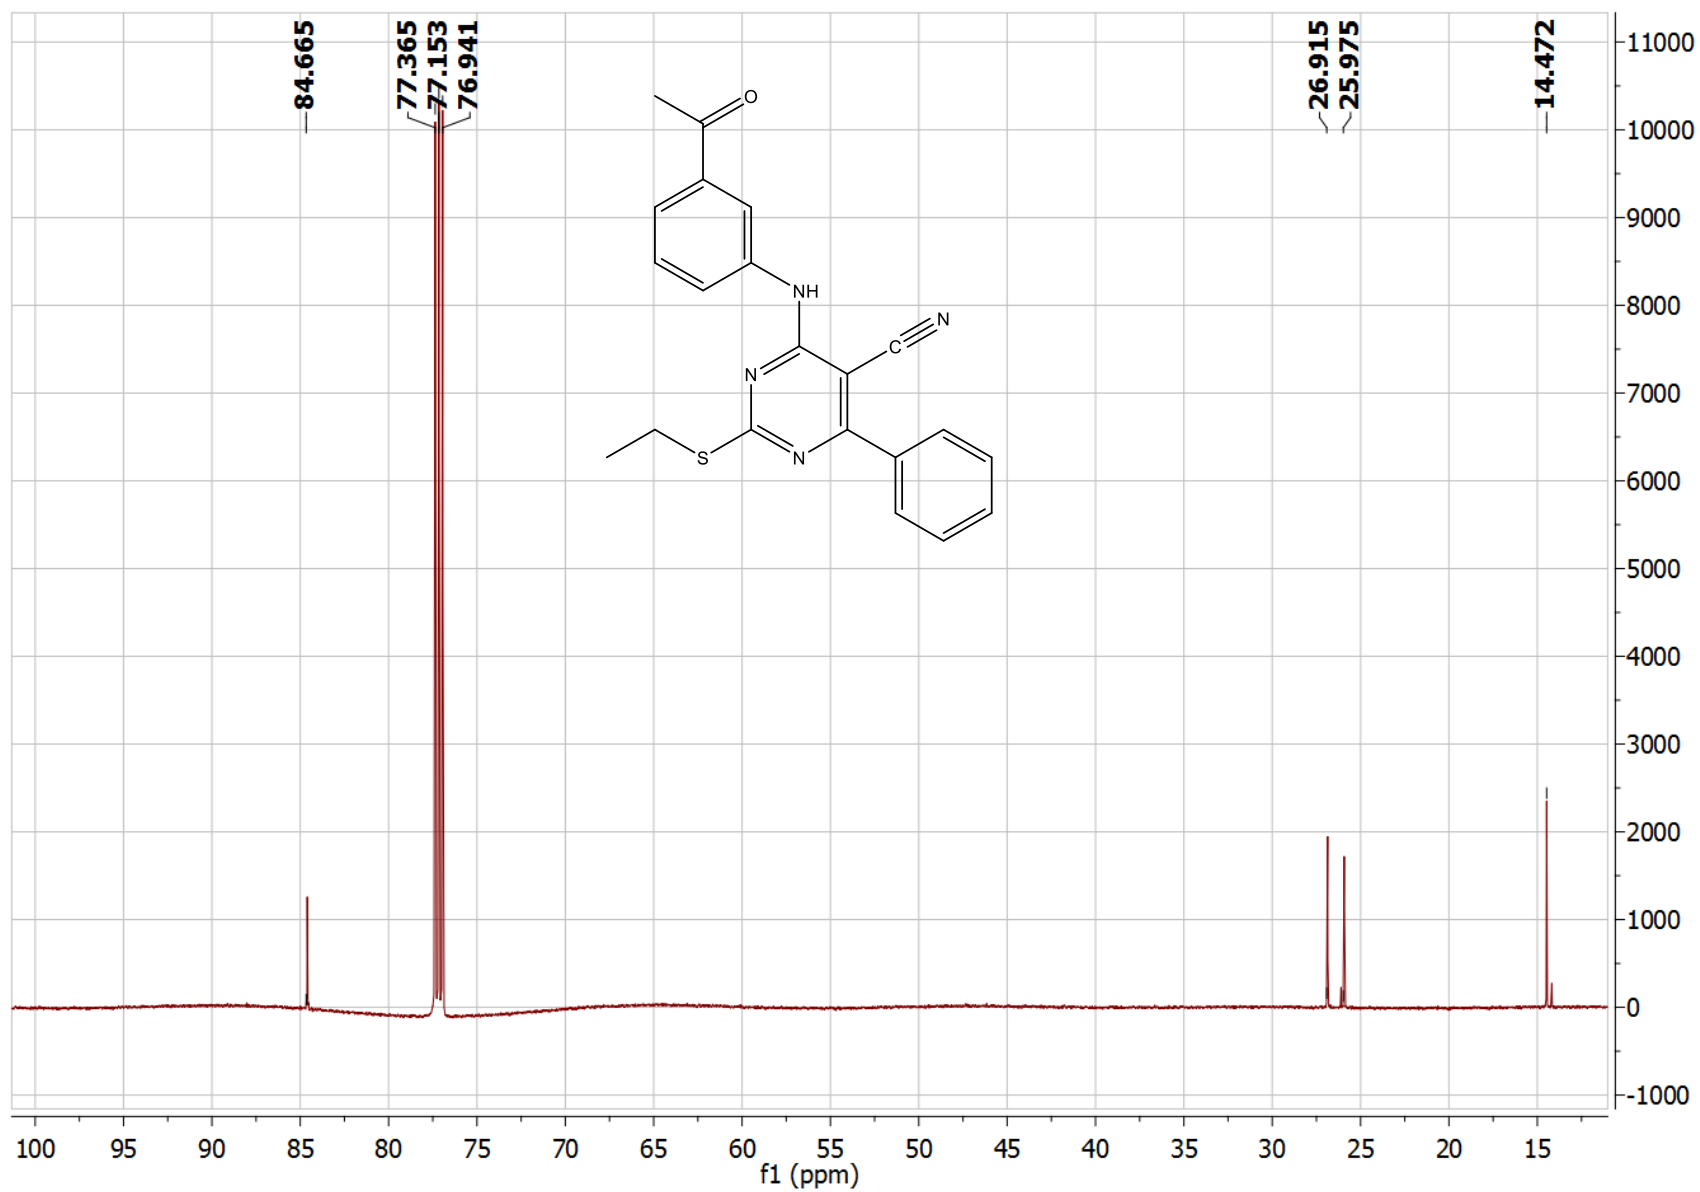

<sup>13</sup>C NMR of compound 15<sub>a</sub>

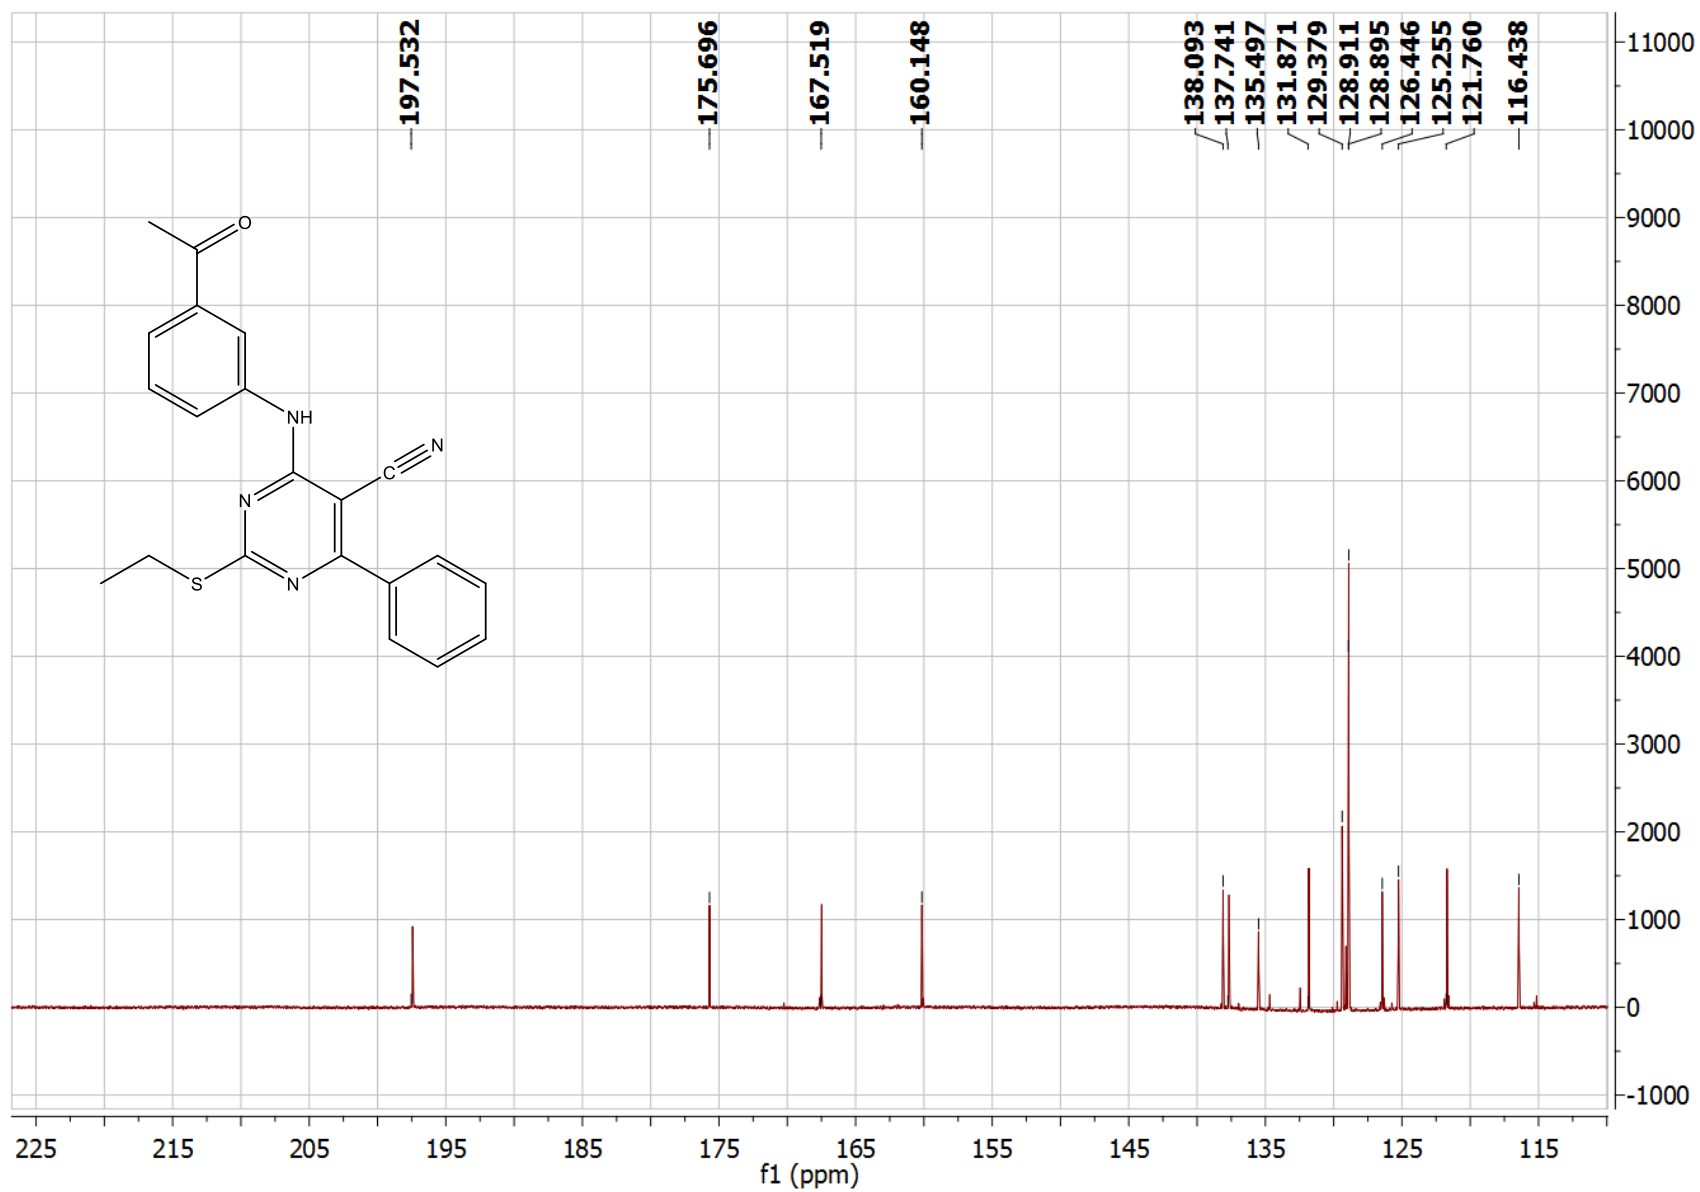

APT of compound 15<sub>a</sub>

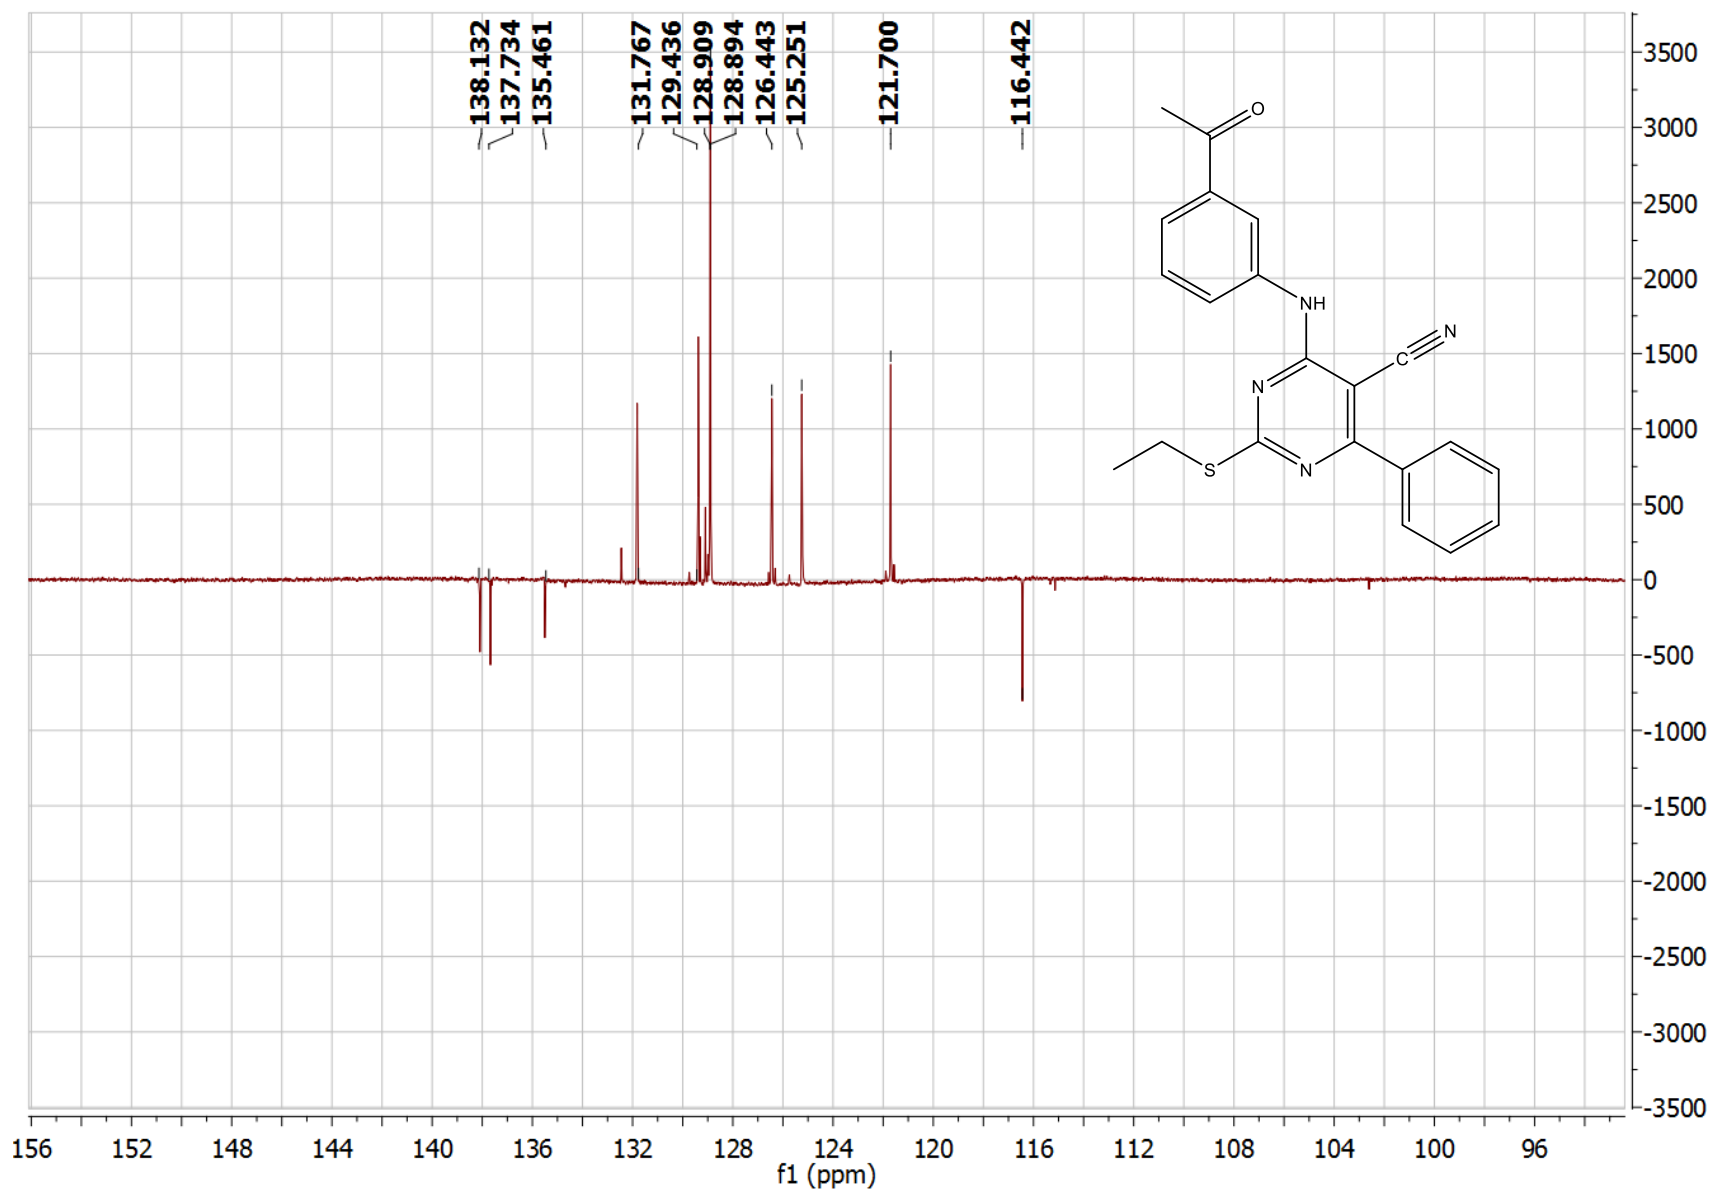



APT of compound 15<sub>a</sub>

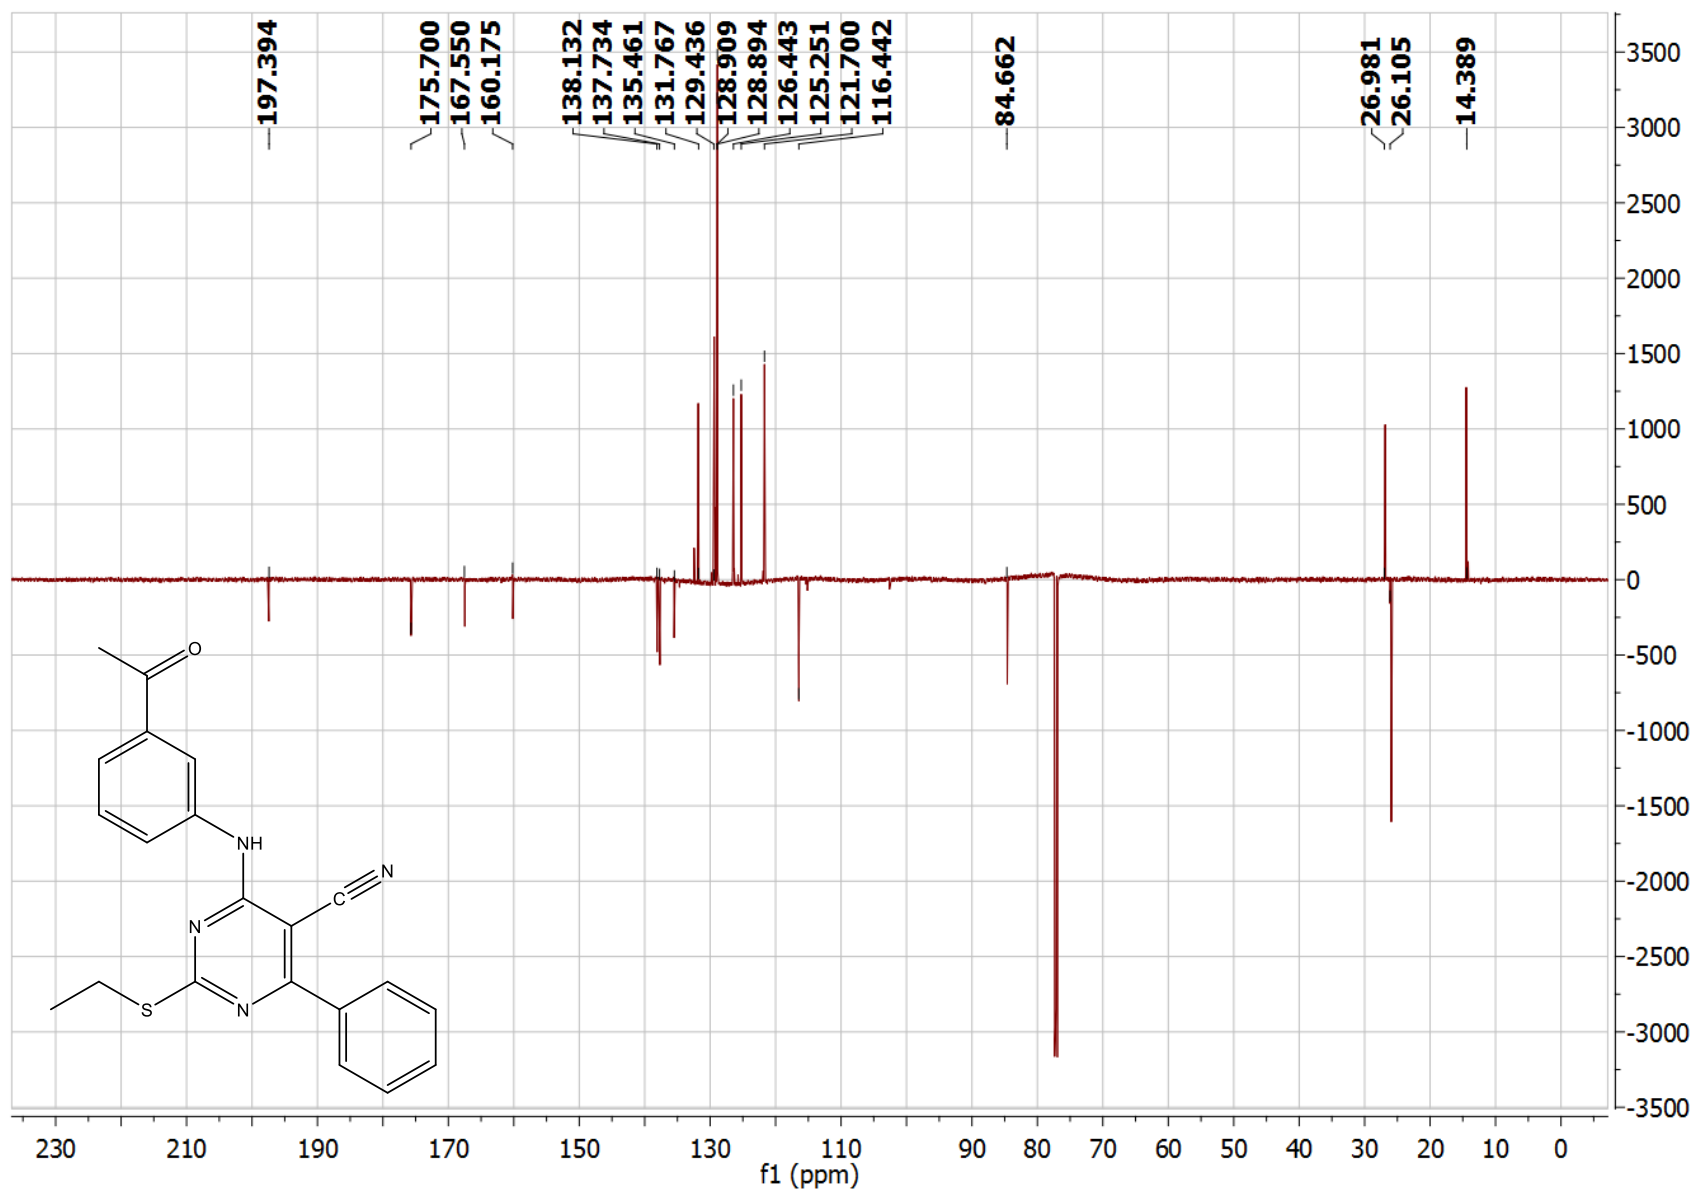

<sup>1</sup>H NMR of compound 15<sub>b</sub>

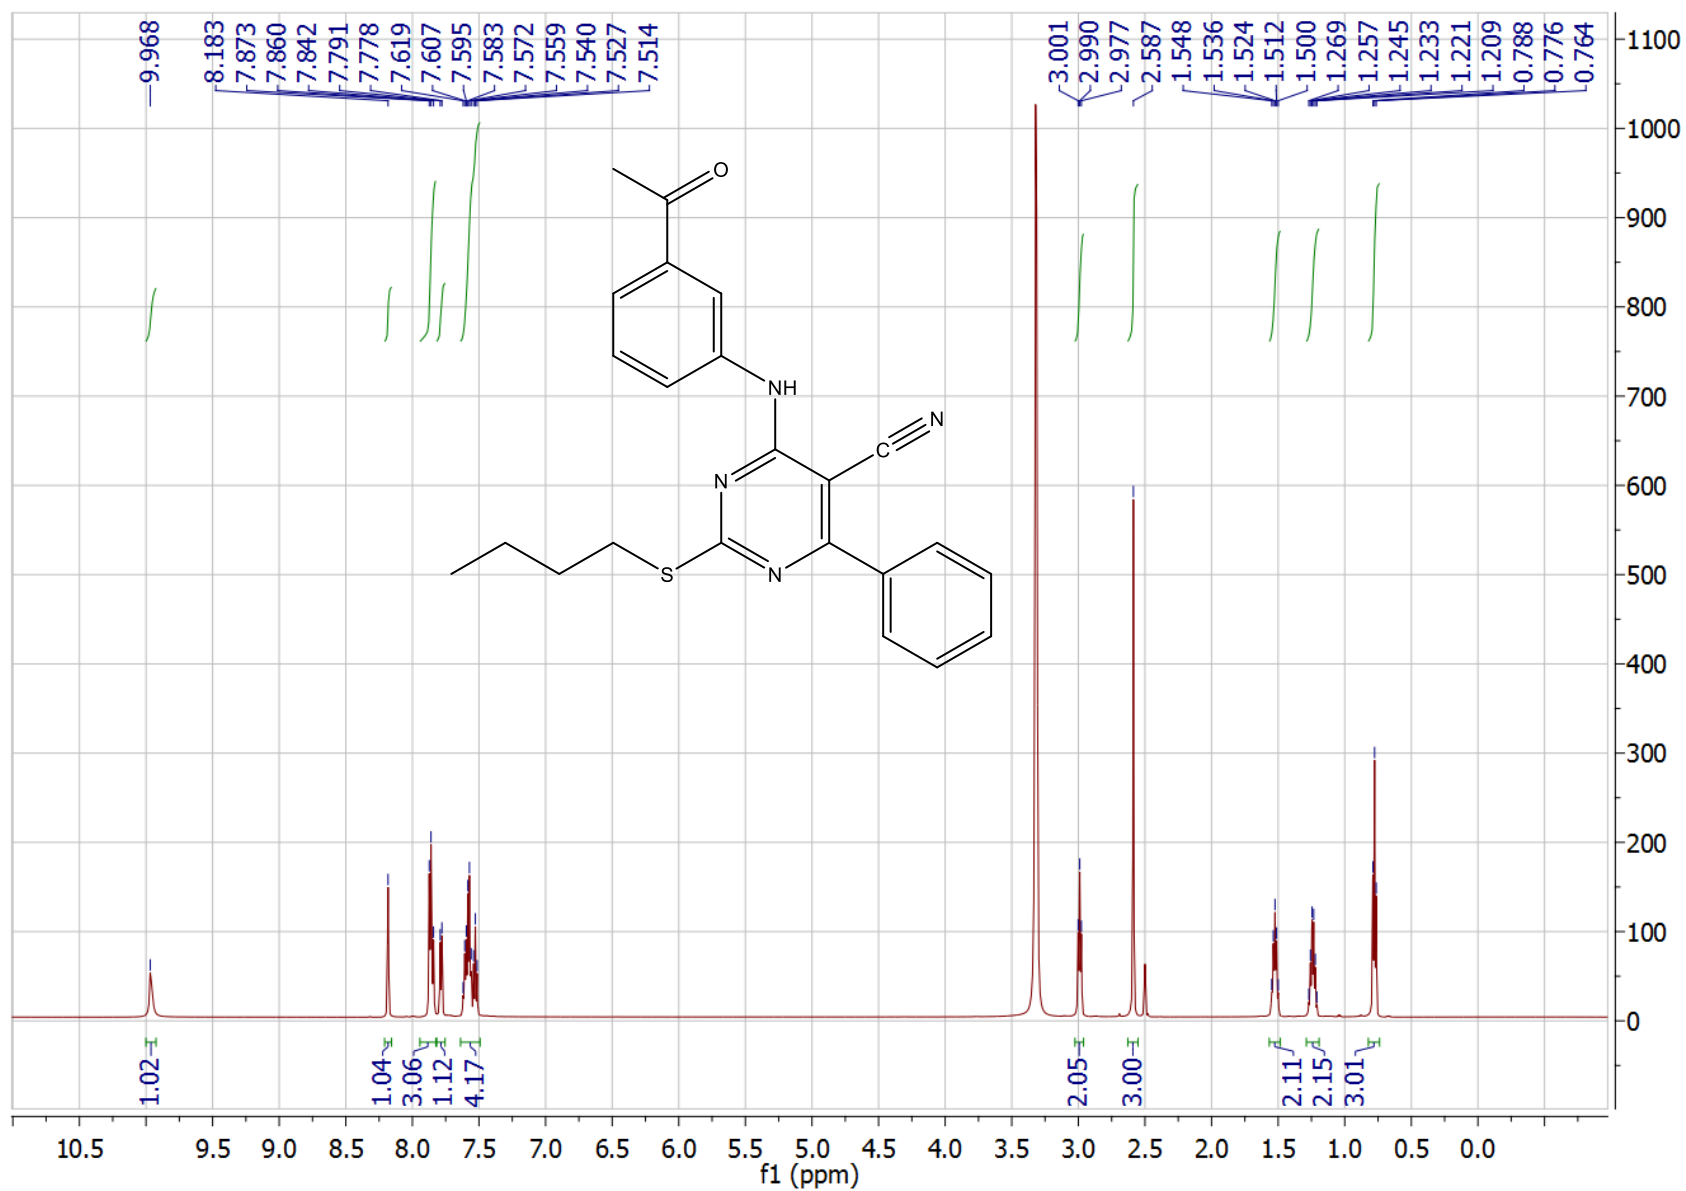

<sup>1</sup>H NMR of compound 15b

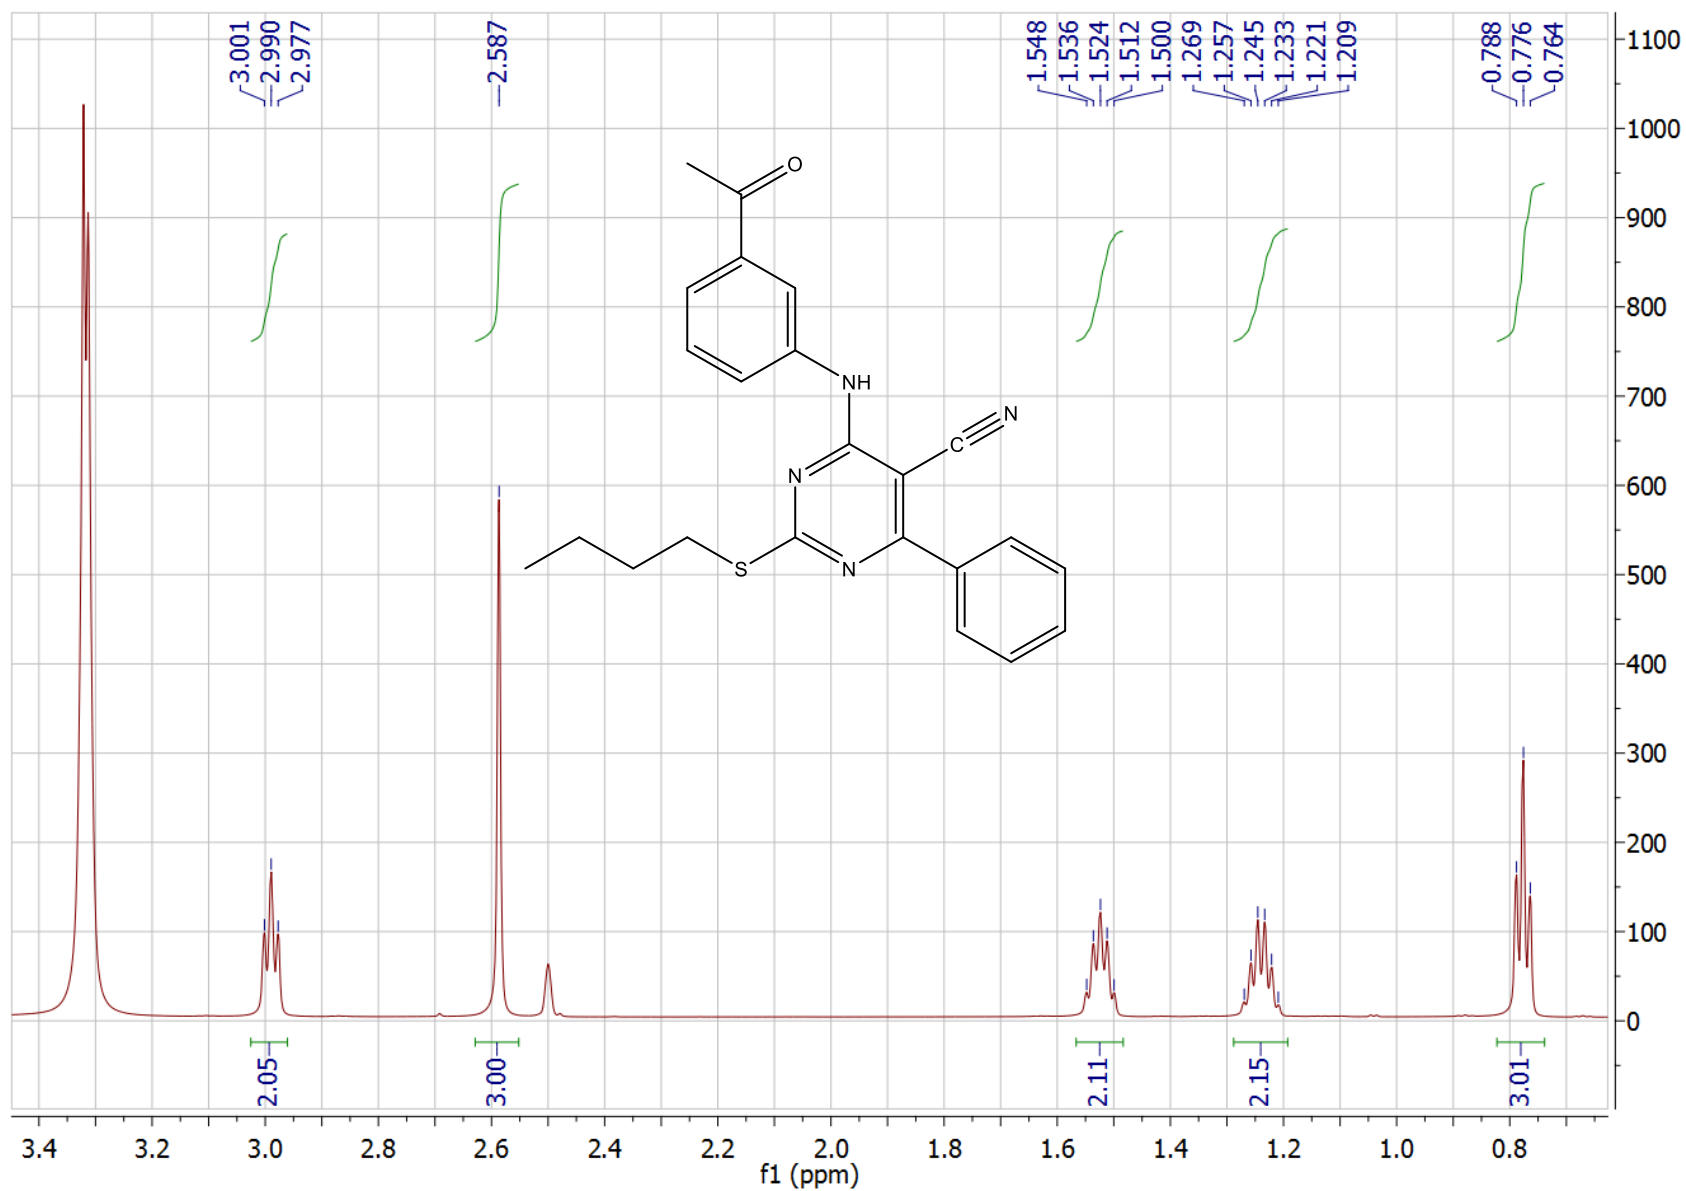

<sup>1</sup>H NMR of compound 15<sub>b</sub>

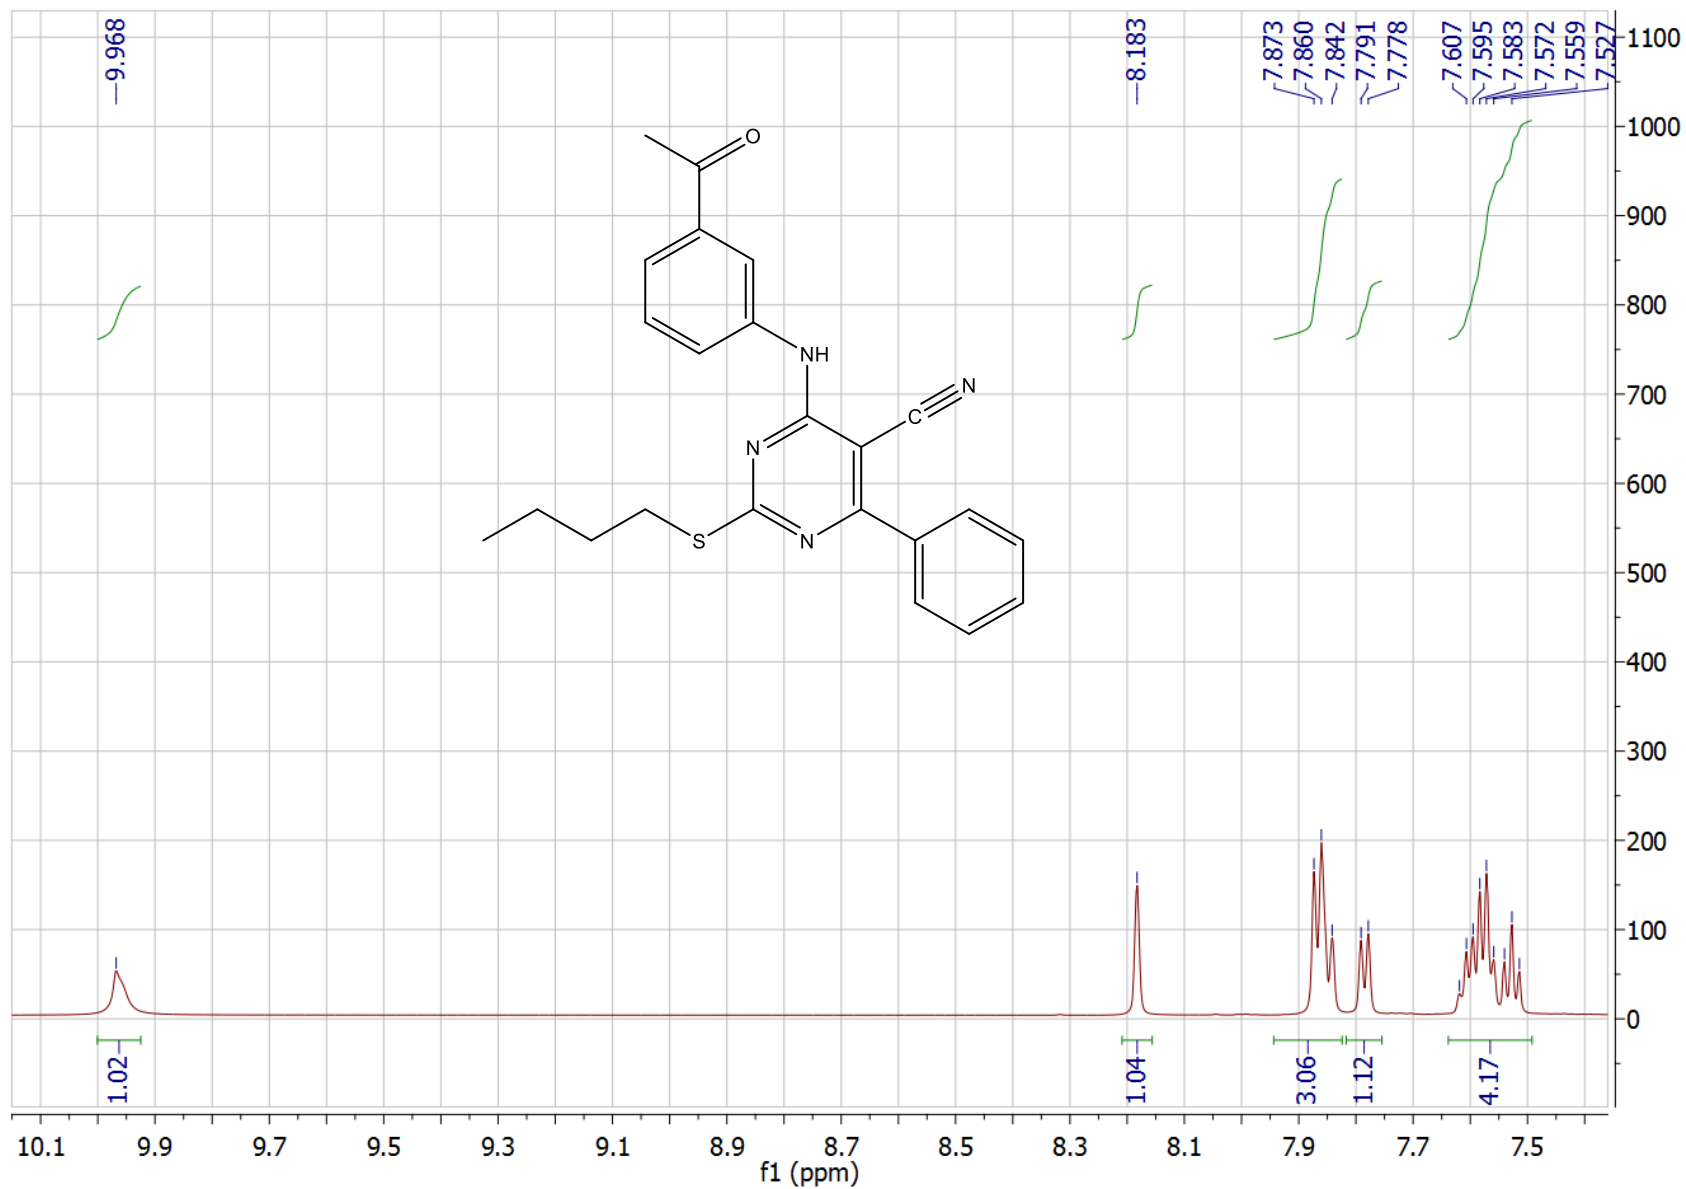

<sup>1</sup>H NMR of compound 15<sub>b</sub>

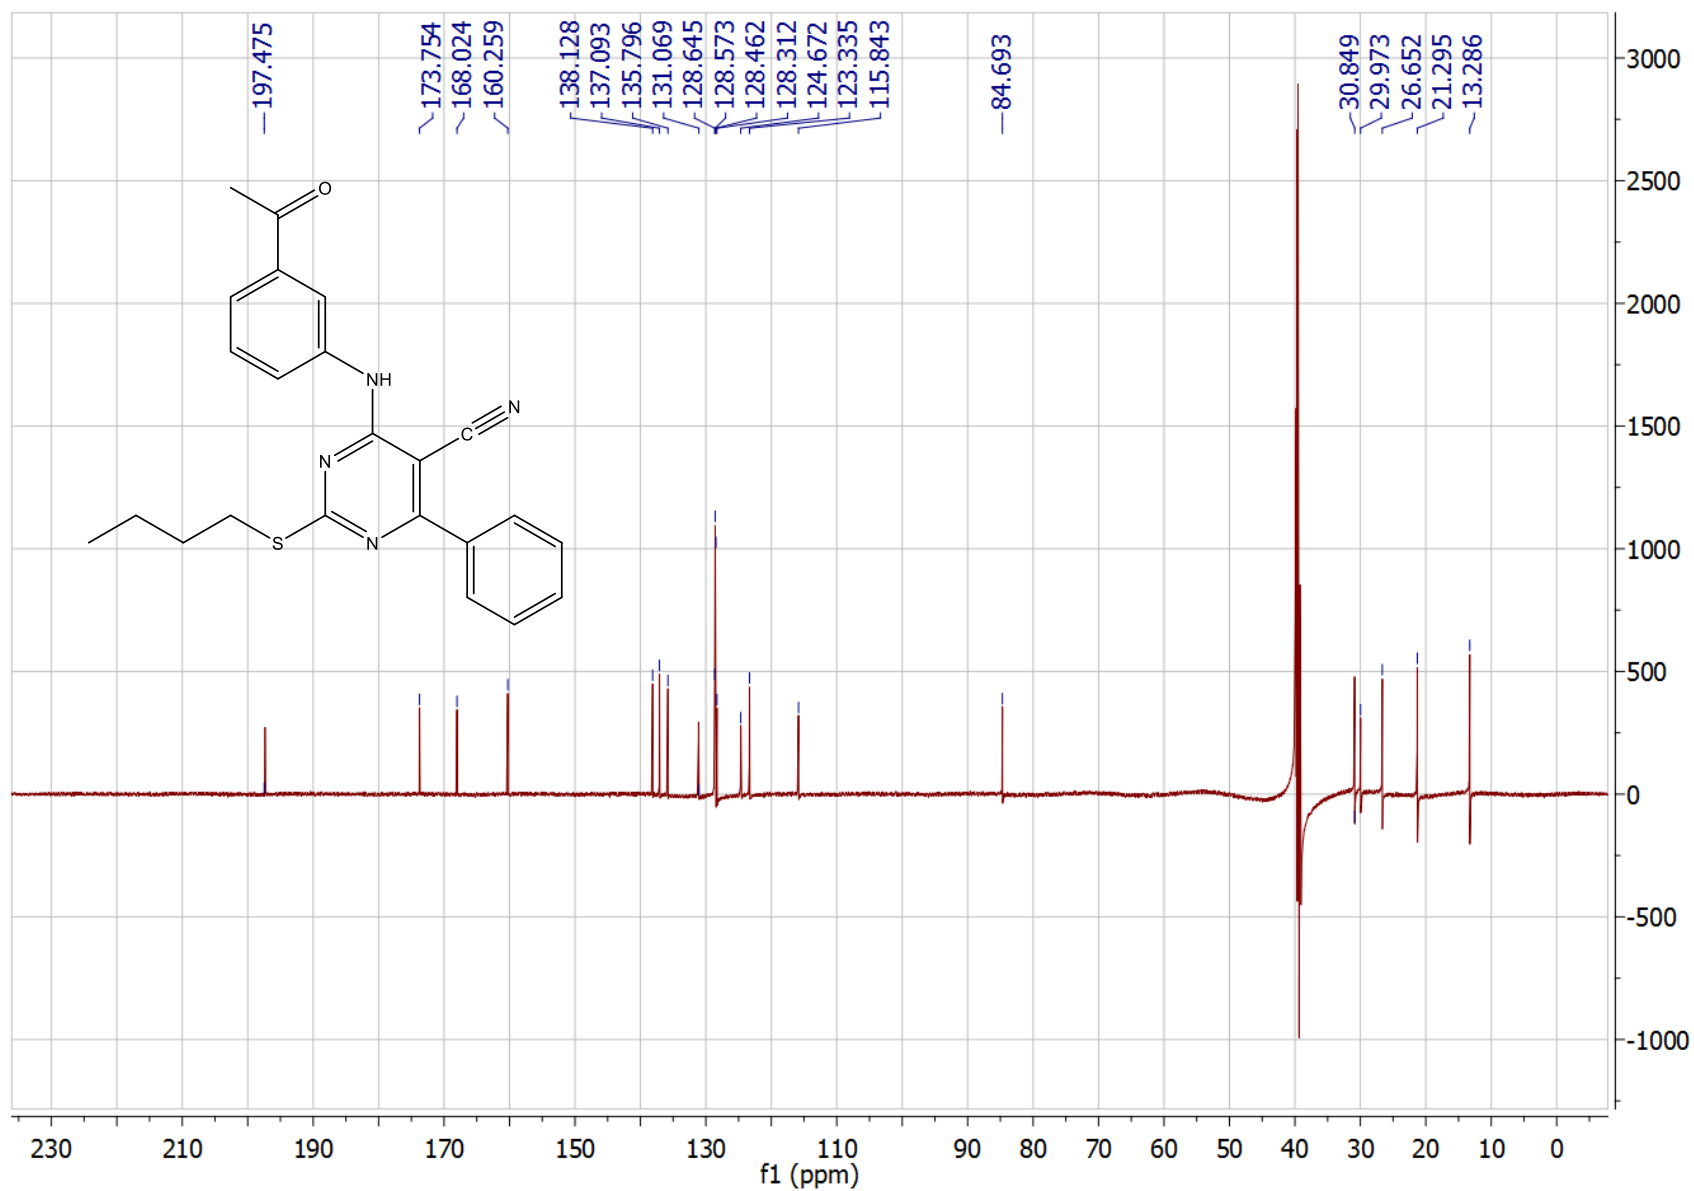

<sup>1</sup>H NMR of compound 15<sub>b</sub>

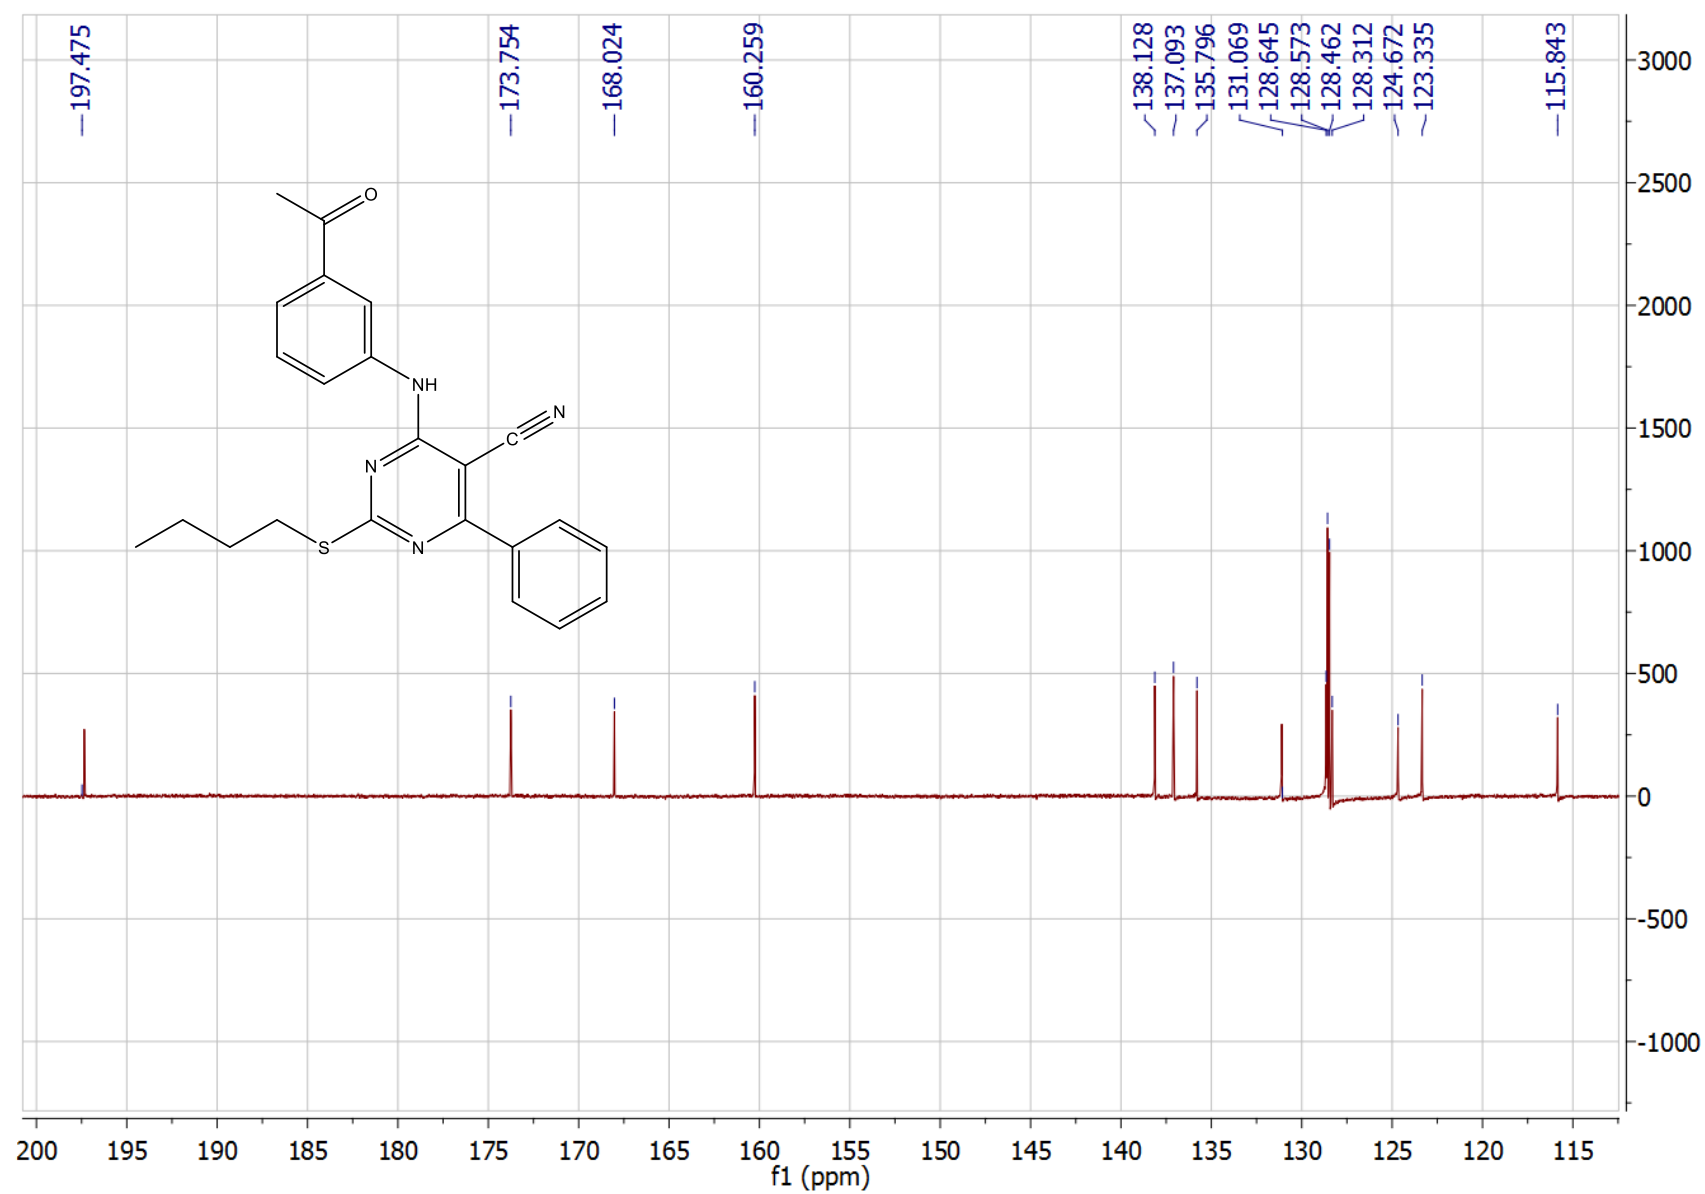

<sup>1</sup>H NMR of compound 15<sub>b</sub>

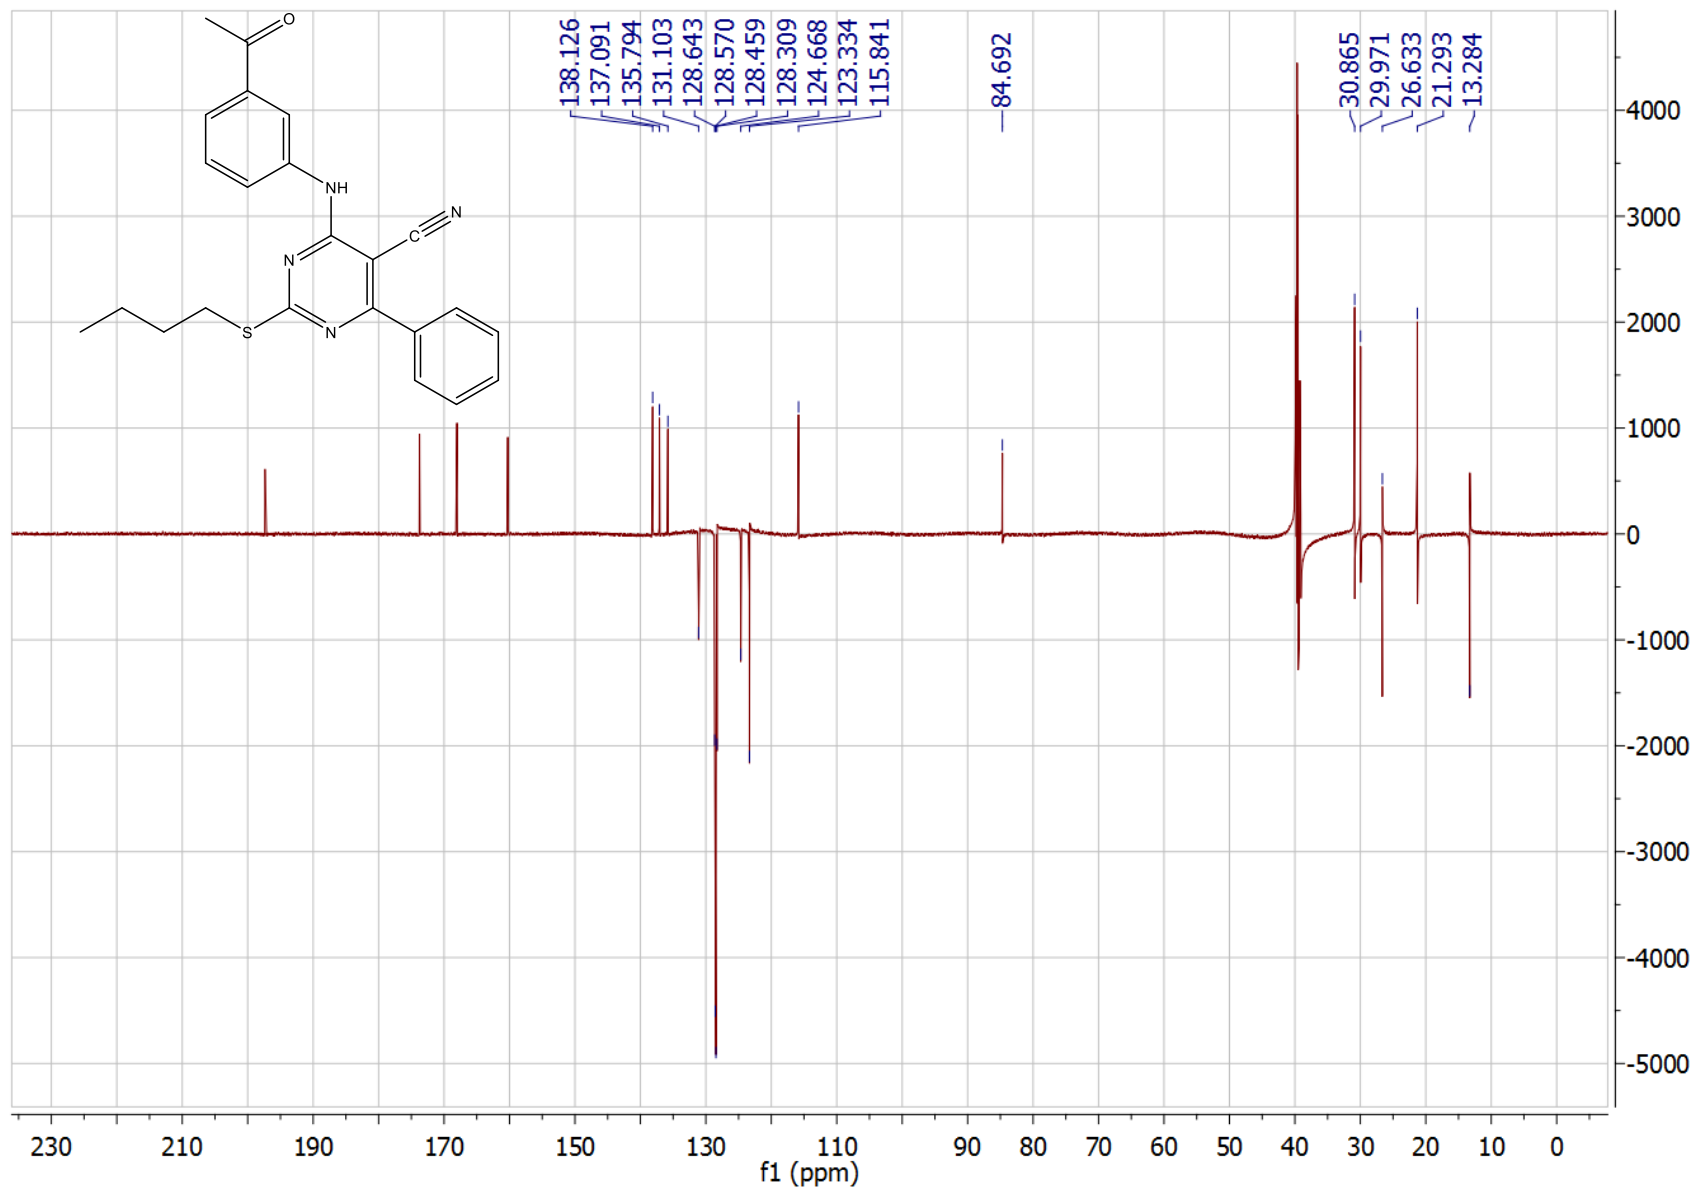

<sup>1</sup>H NMR of compound 15<sub>b</sub>

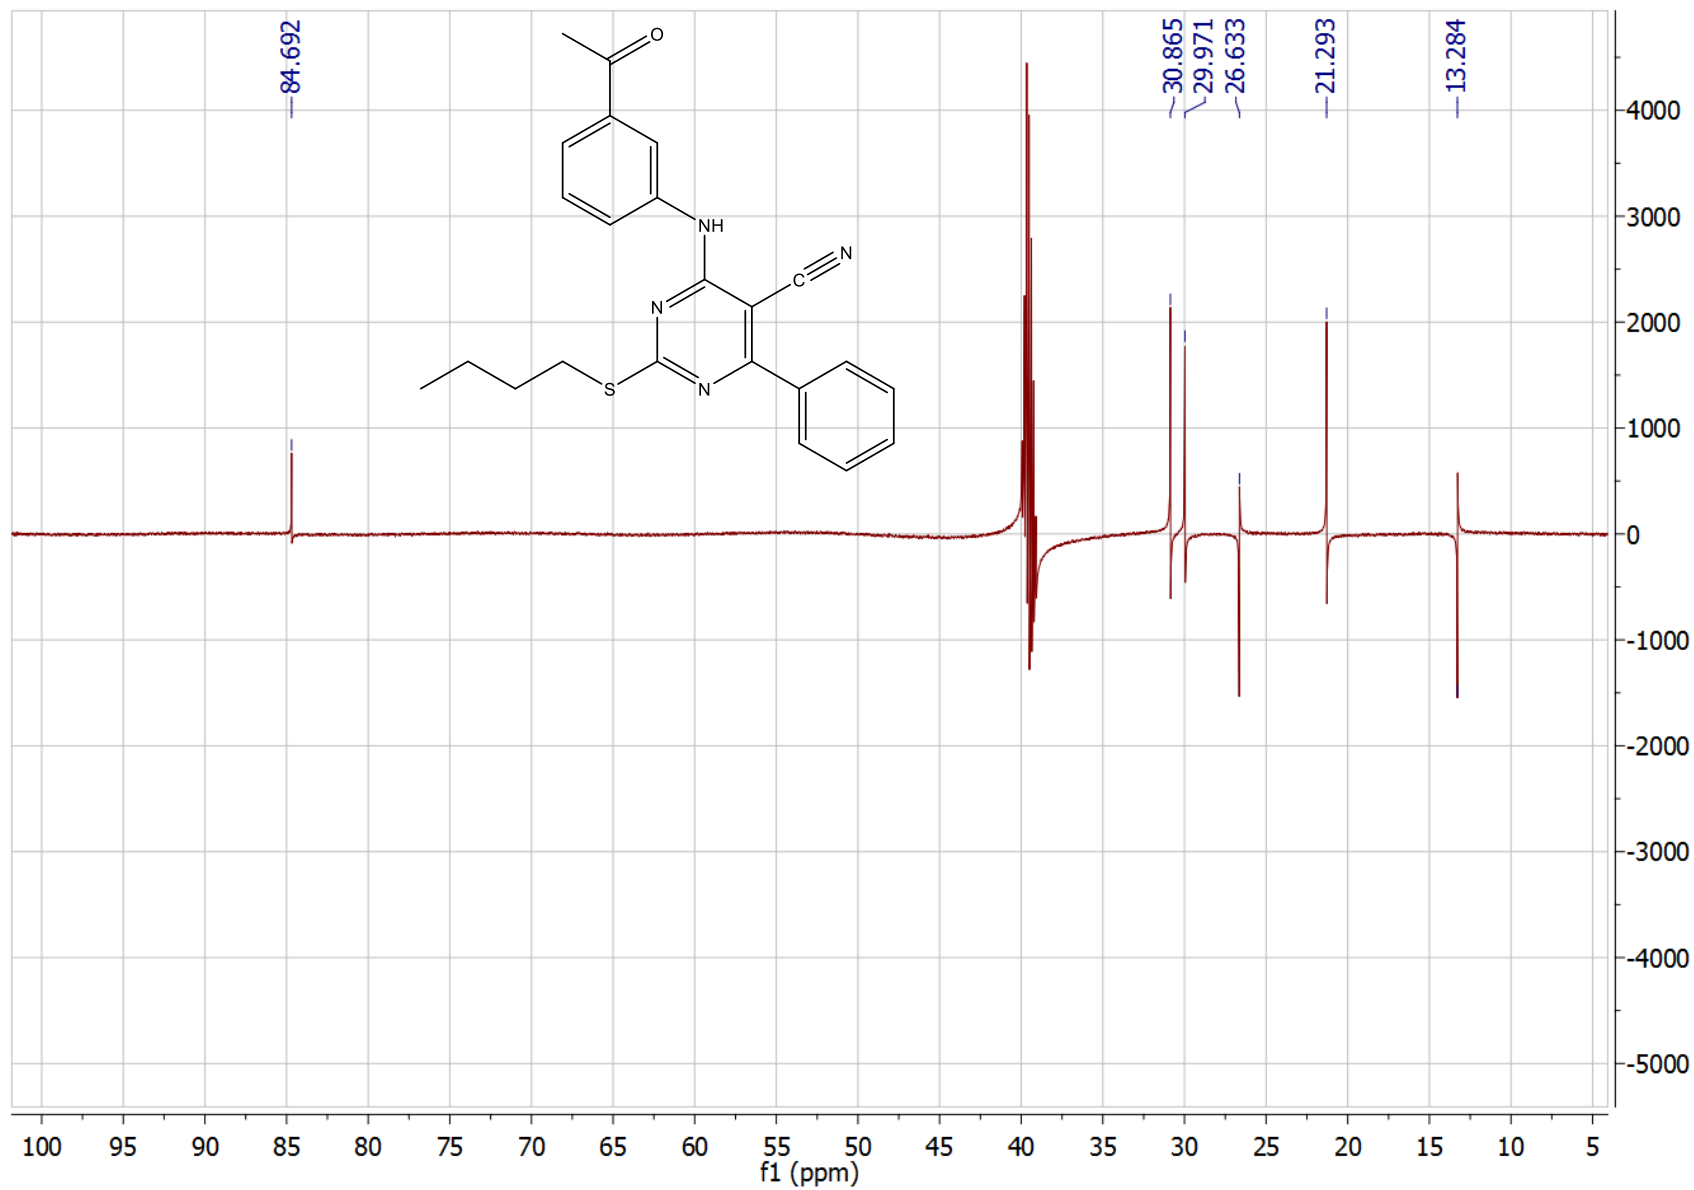



<sup>1</sup>H NMR of compound 15<sub>b</sub>

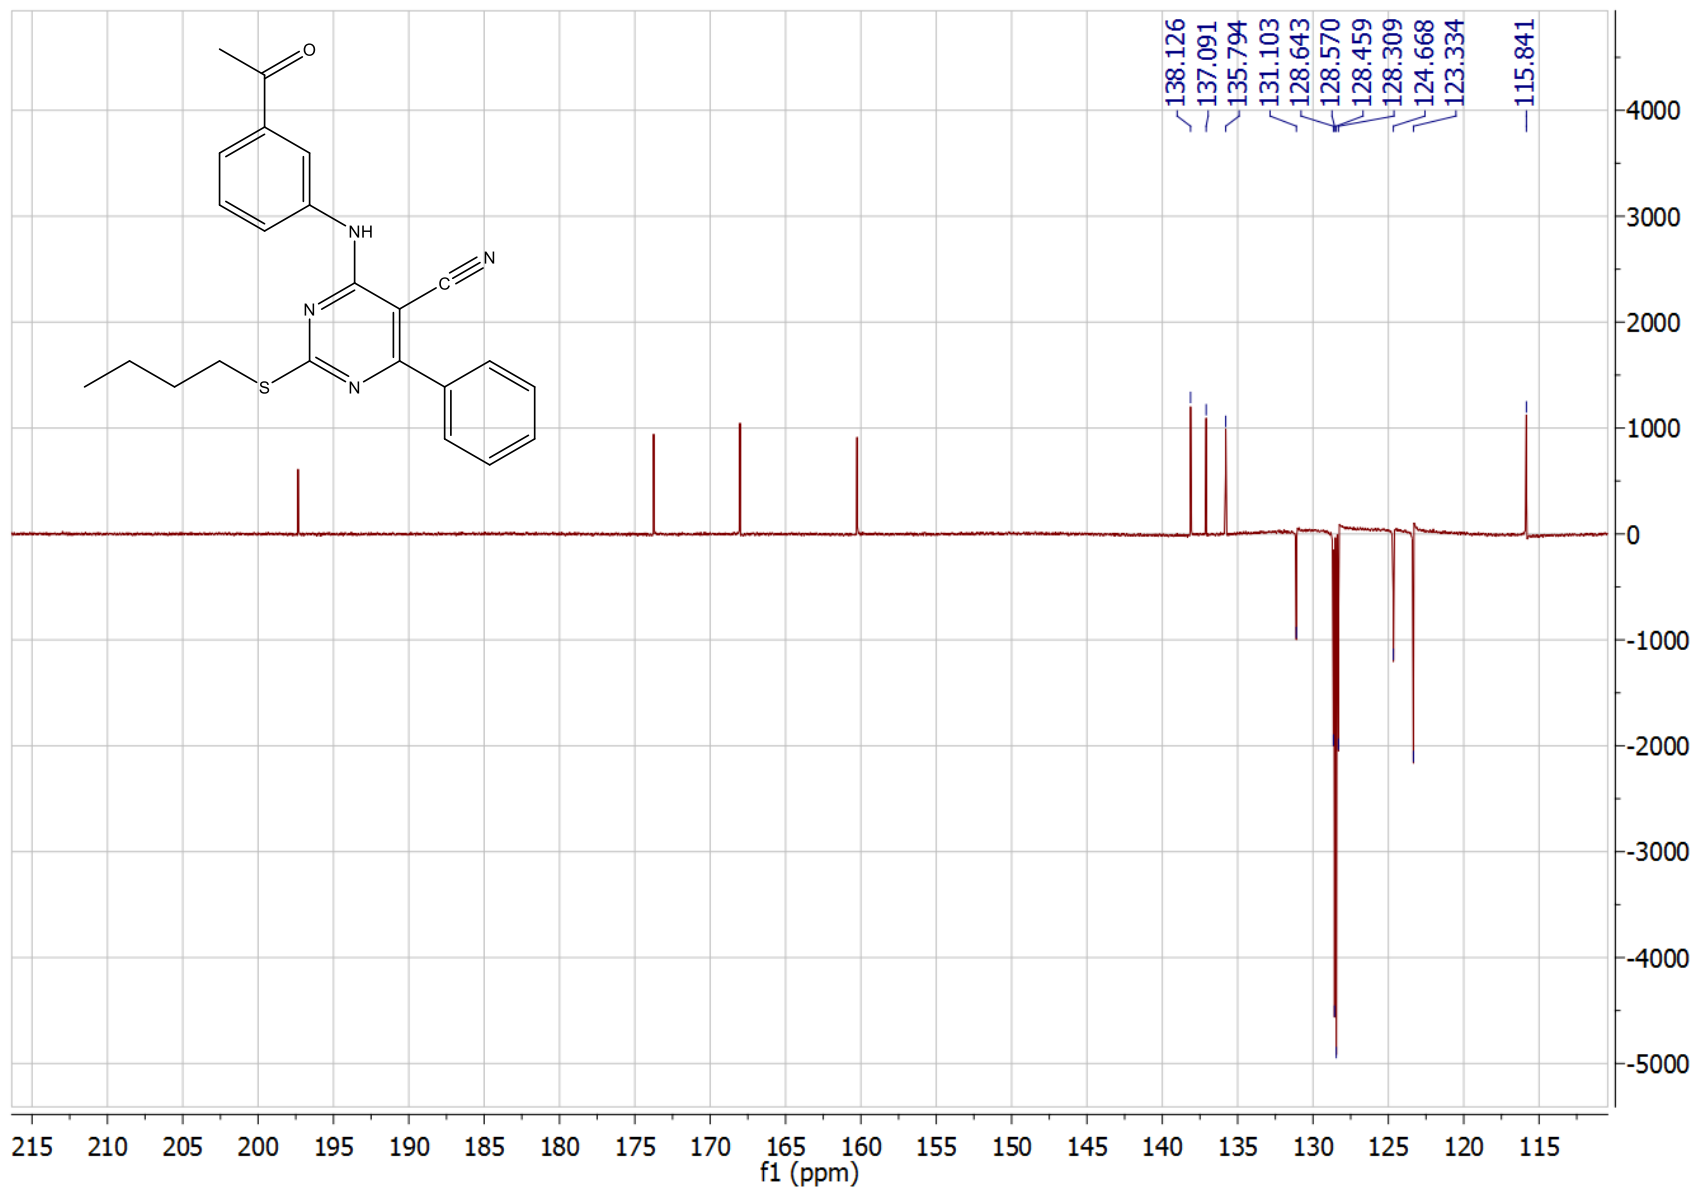

## AMostafa NP-5

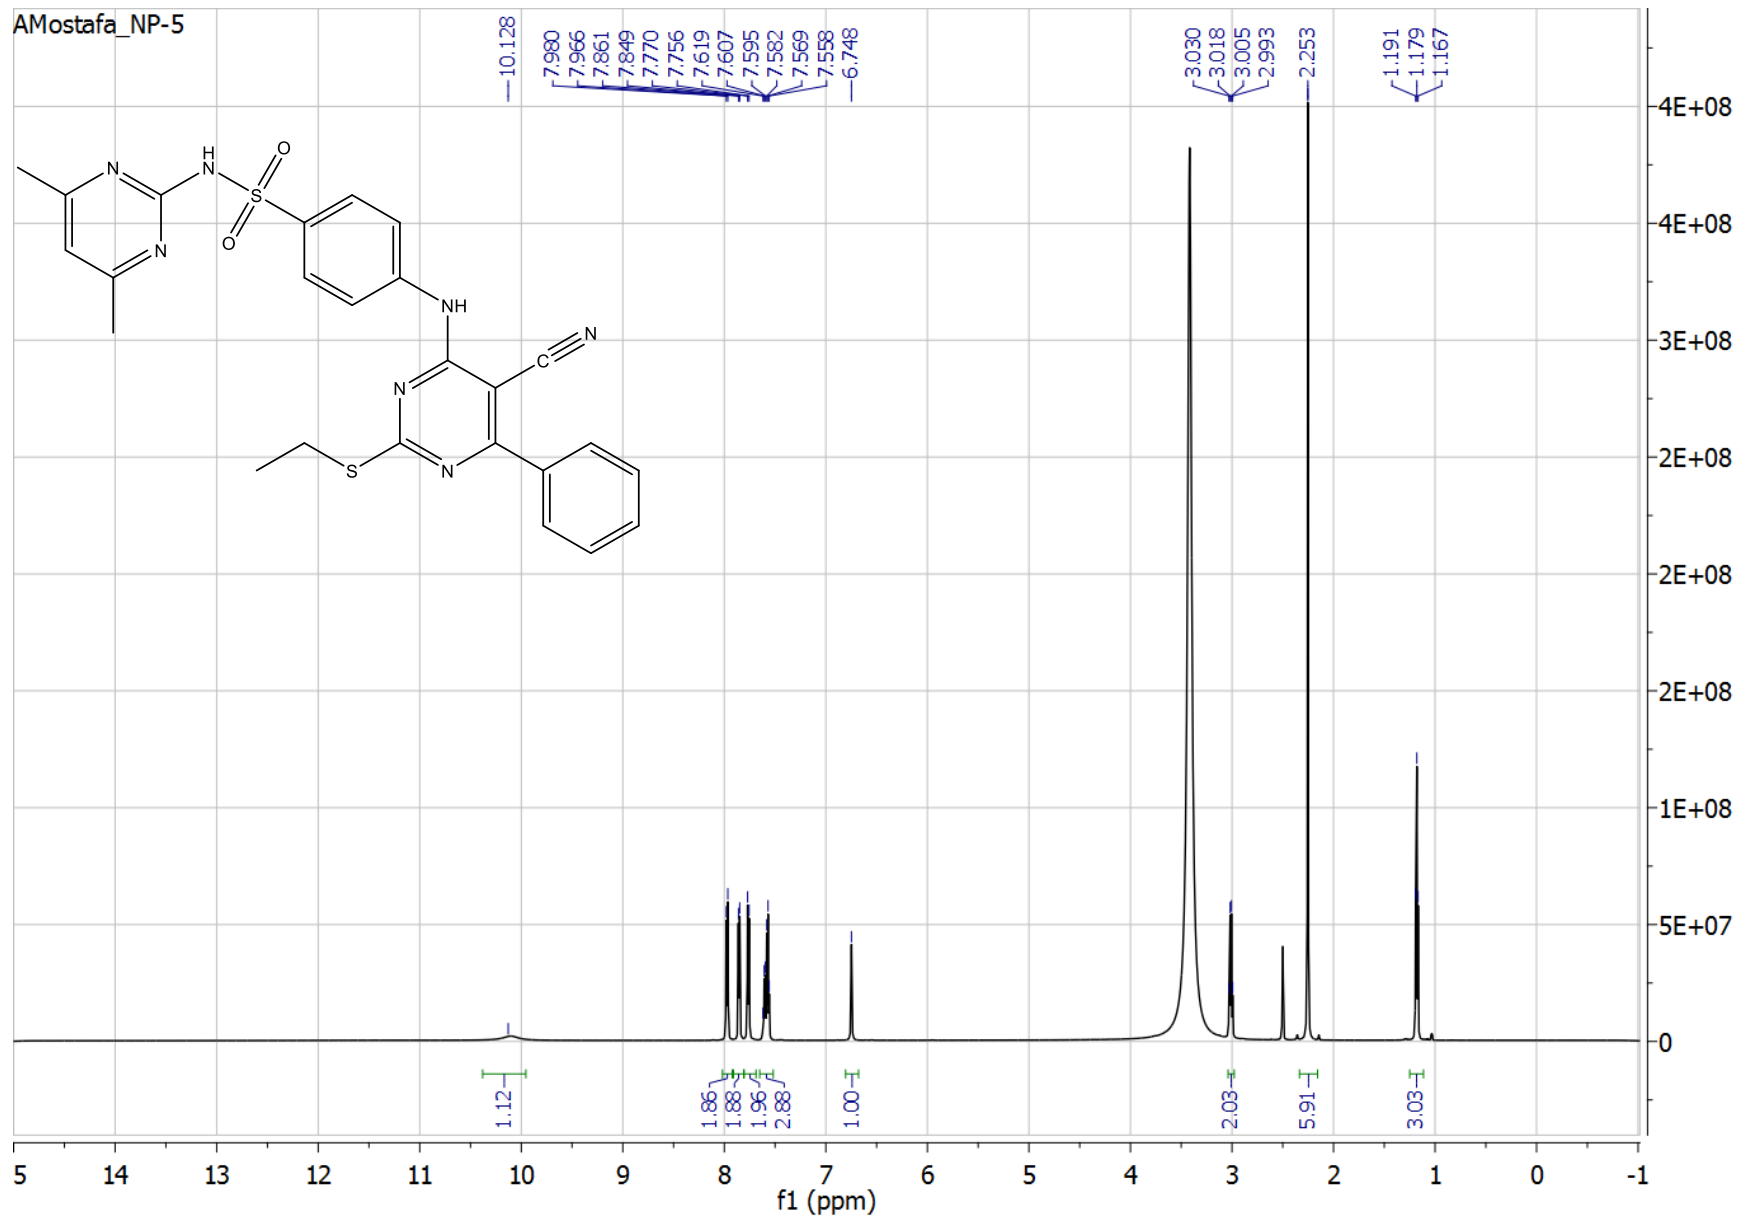

**<sup>1</sup>H NMR of compound 16<sub>a</sub>**

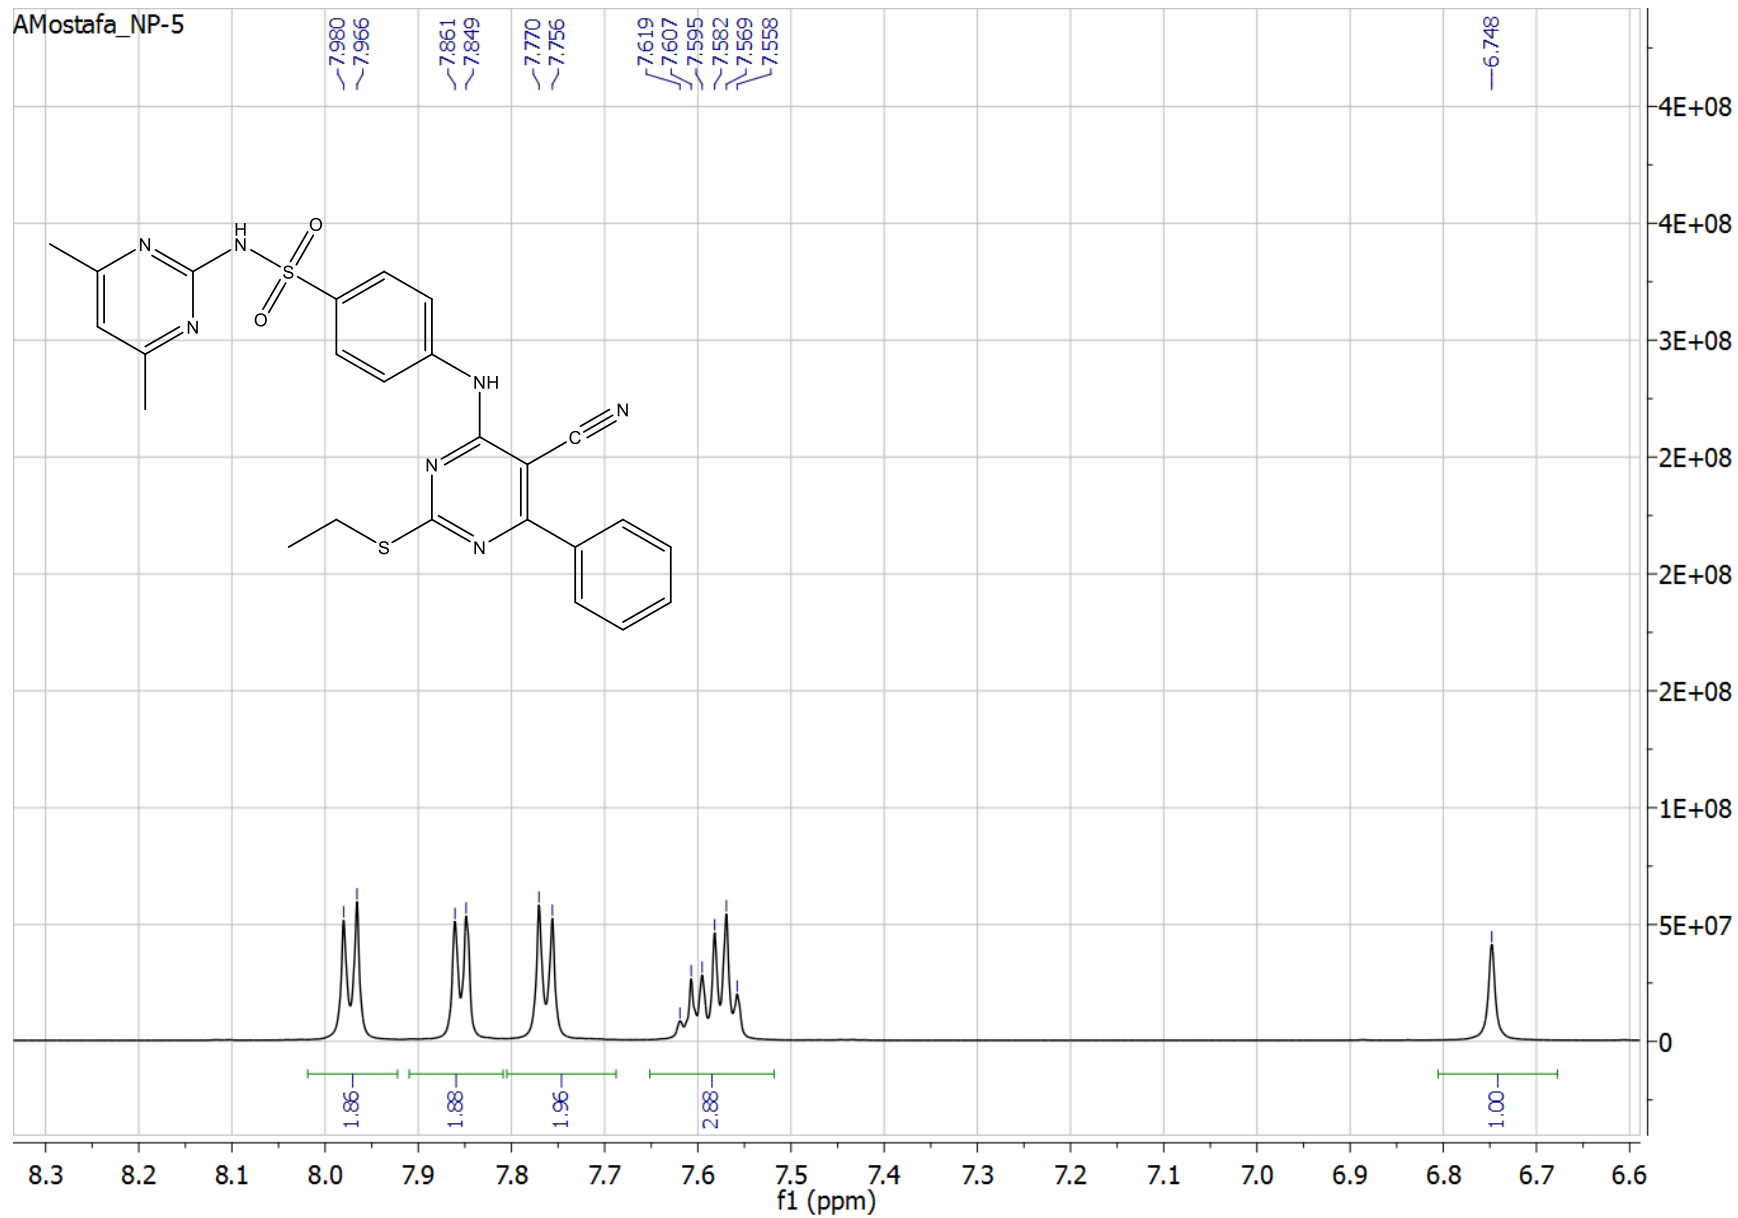

**<sup>13</sup>C NMR of compound 16<sub>a</sub>**

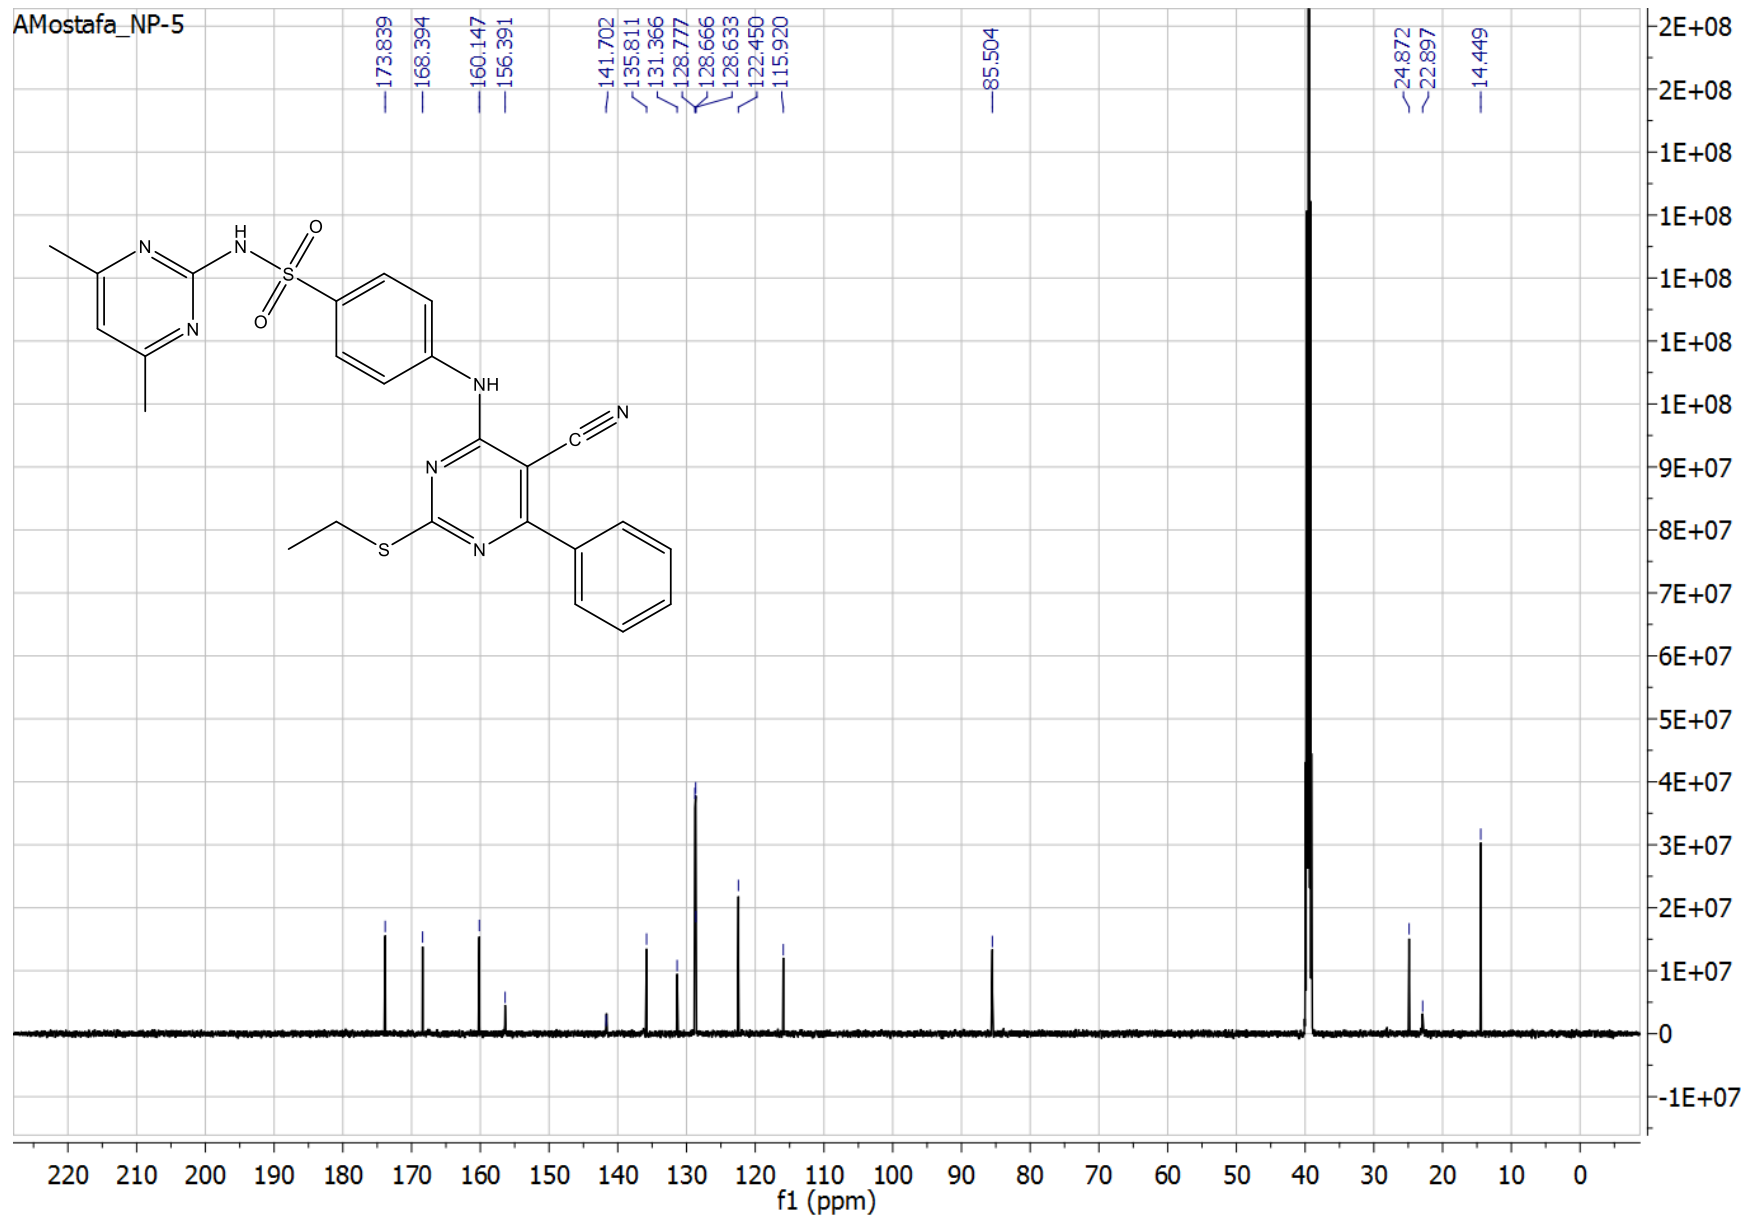

<sup>1</sup>H NMR of compound 16b

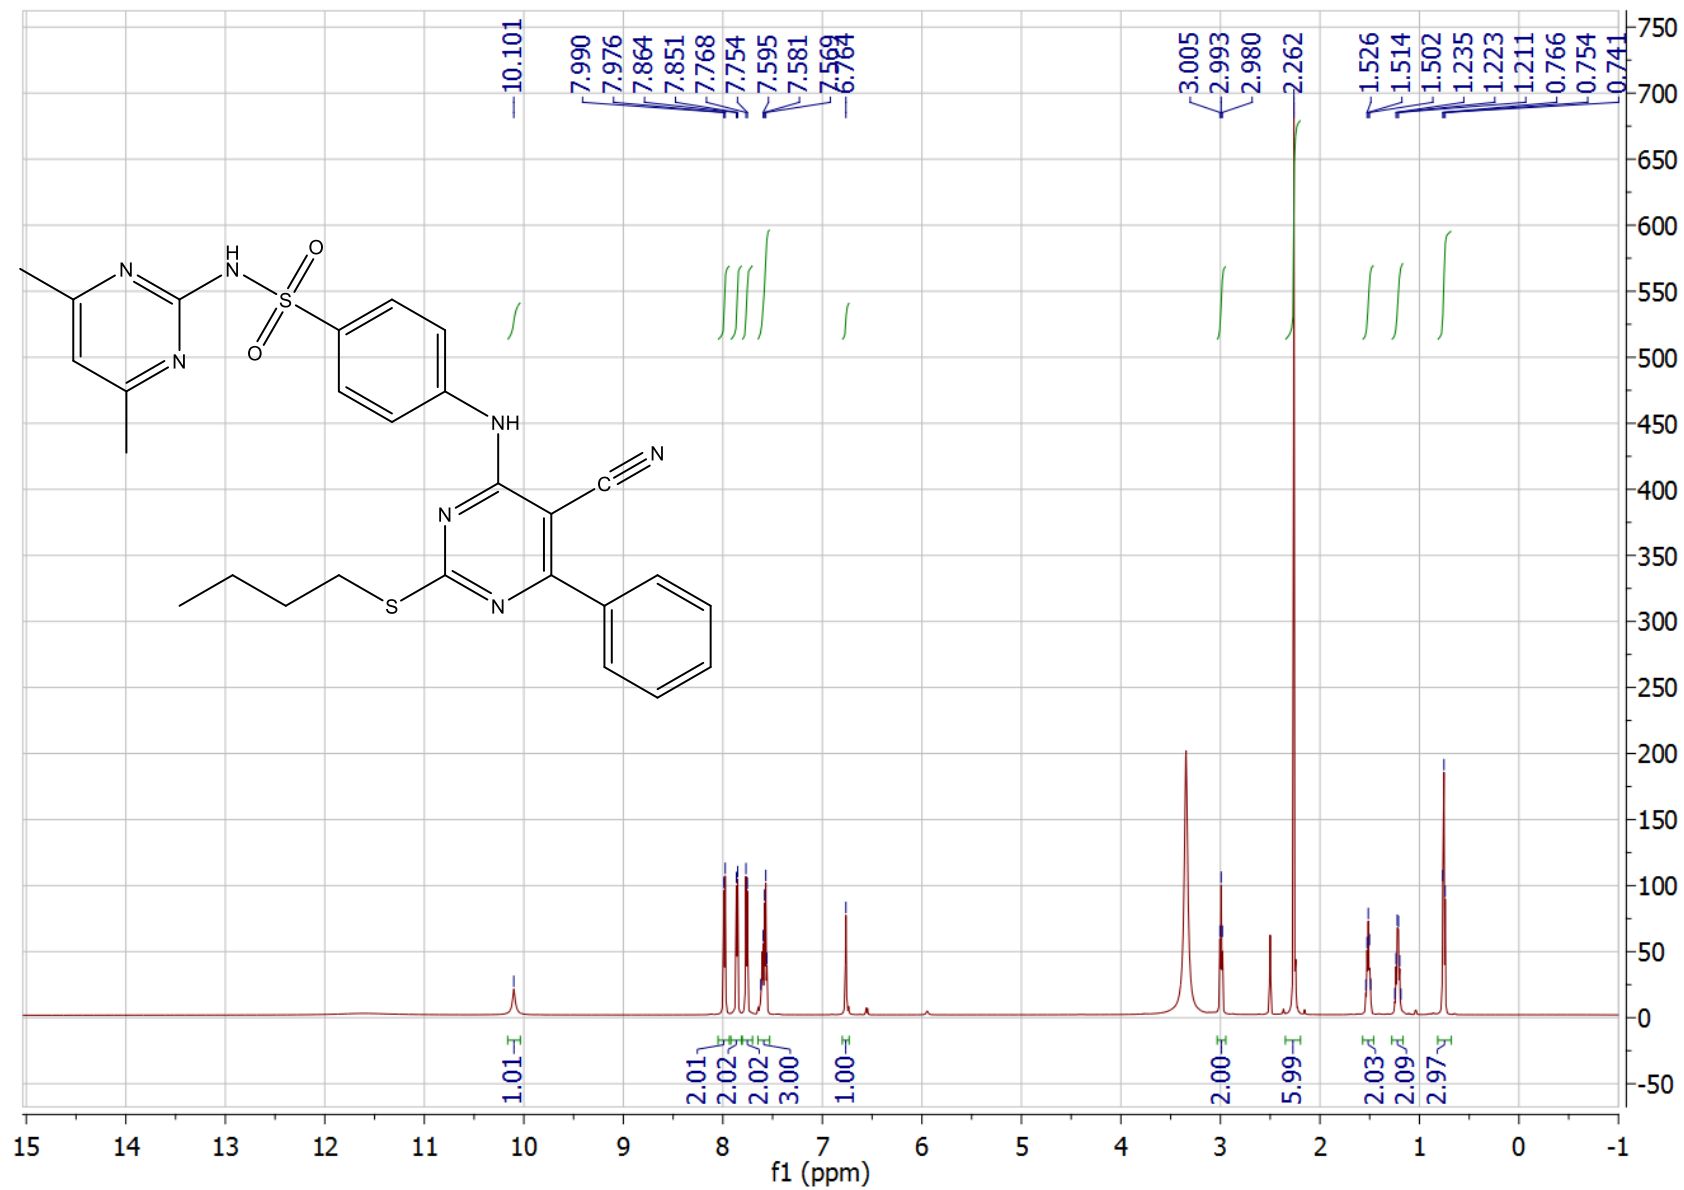

<sup>1</sup>H NMR of compound 16b

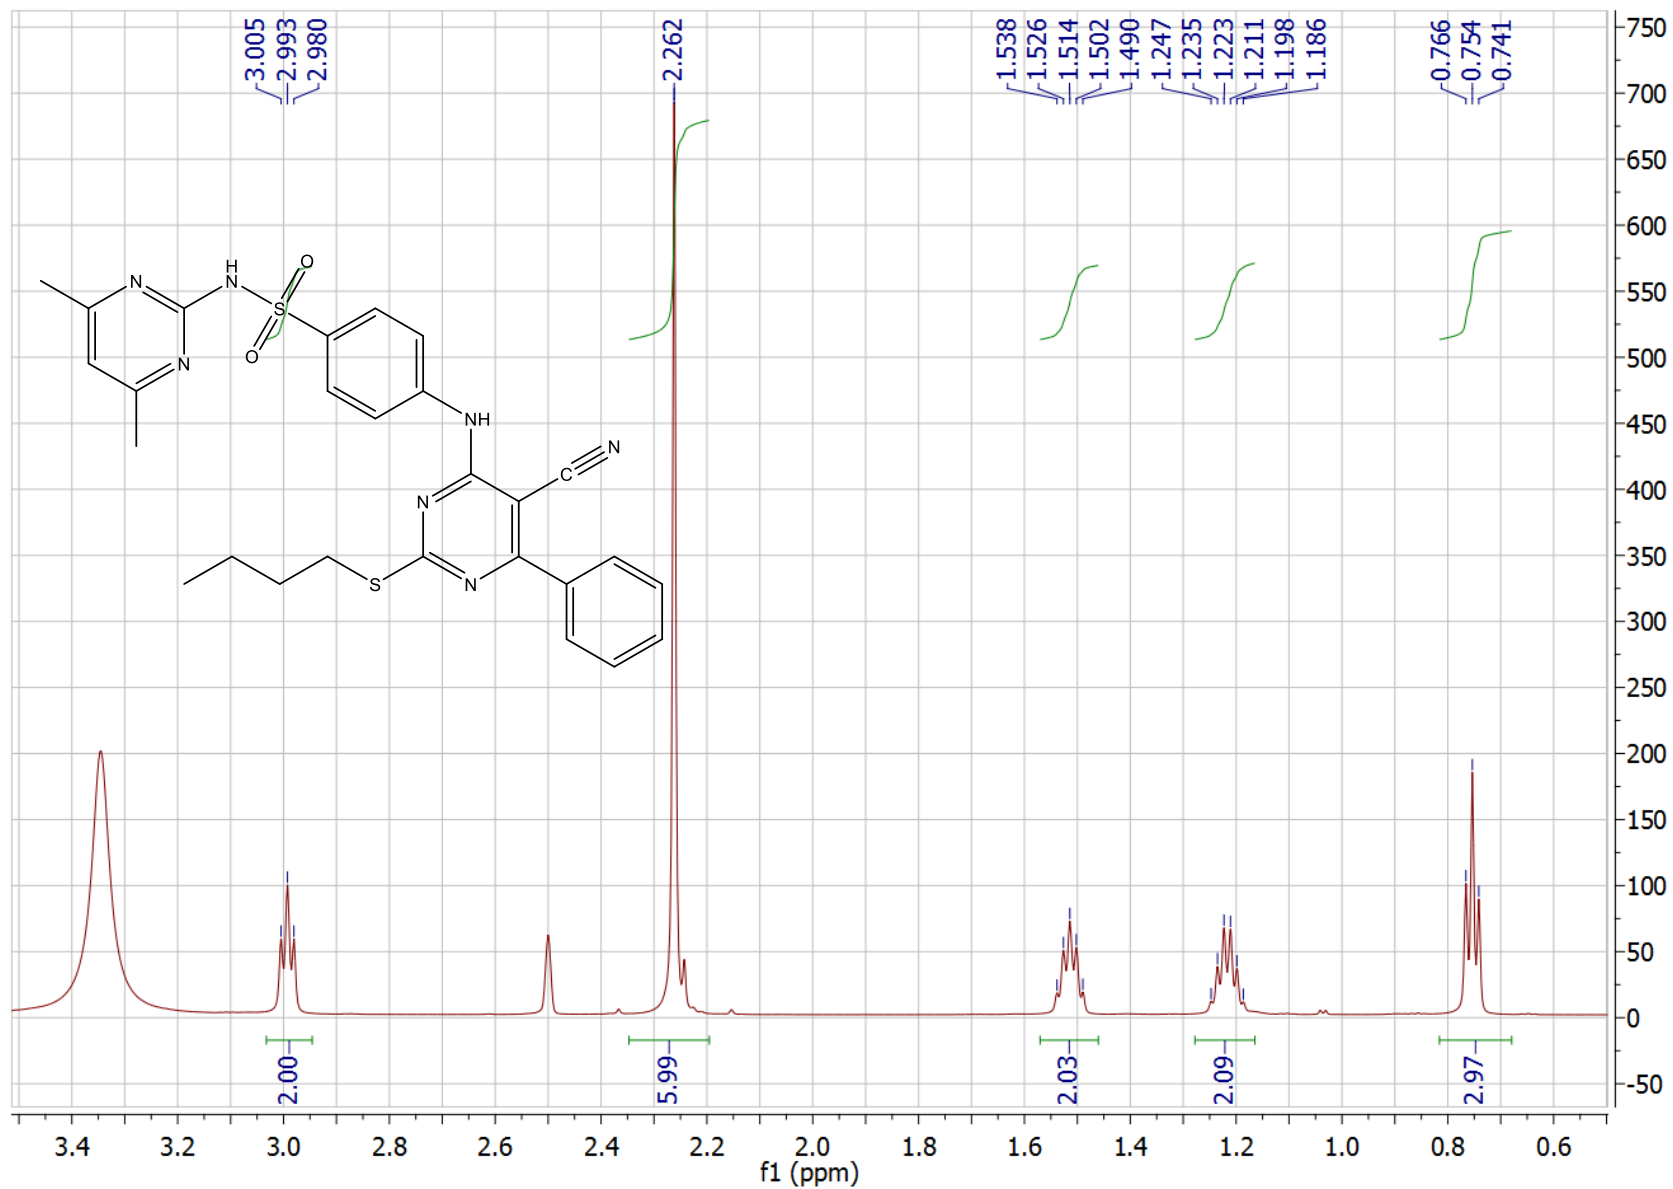

<sup>1</sup>H NMR of compound 16b

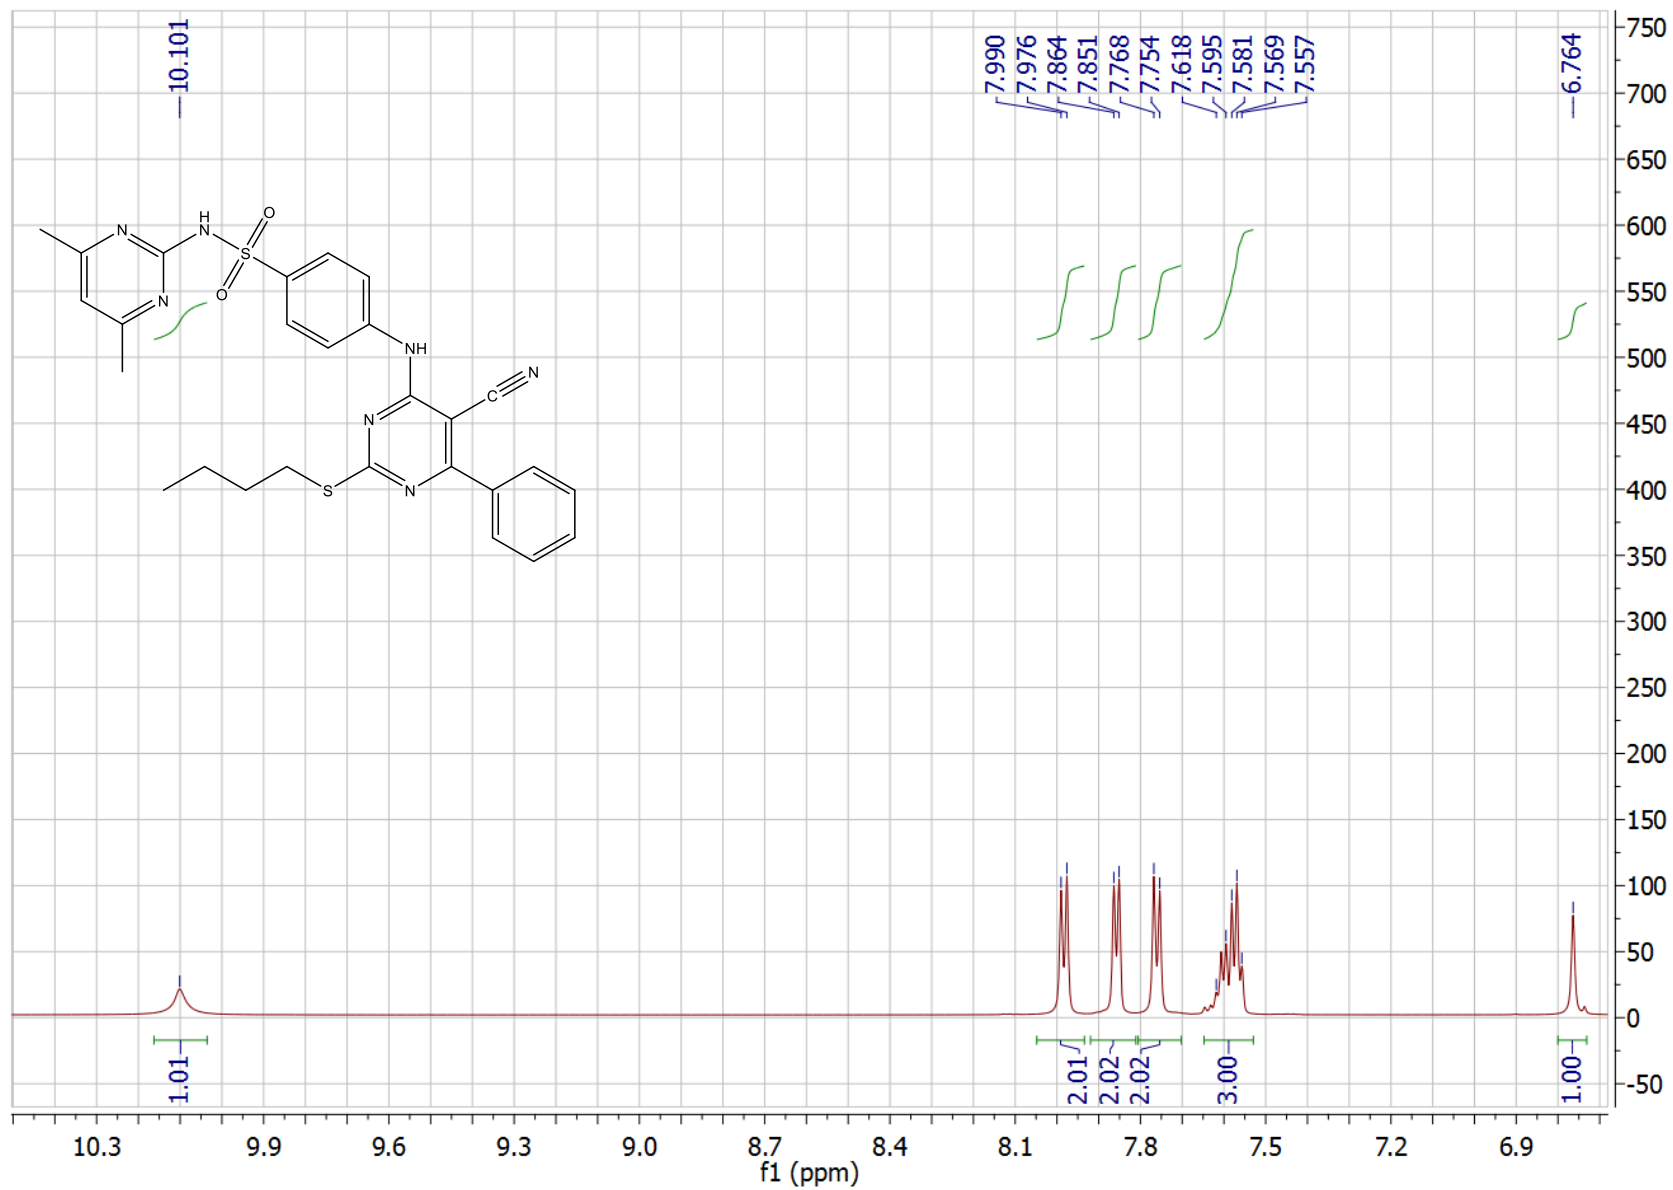

**<sup>13</sup>C NMR of compound 16b**

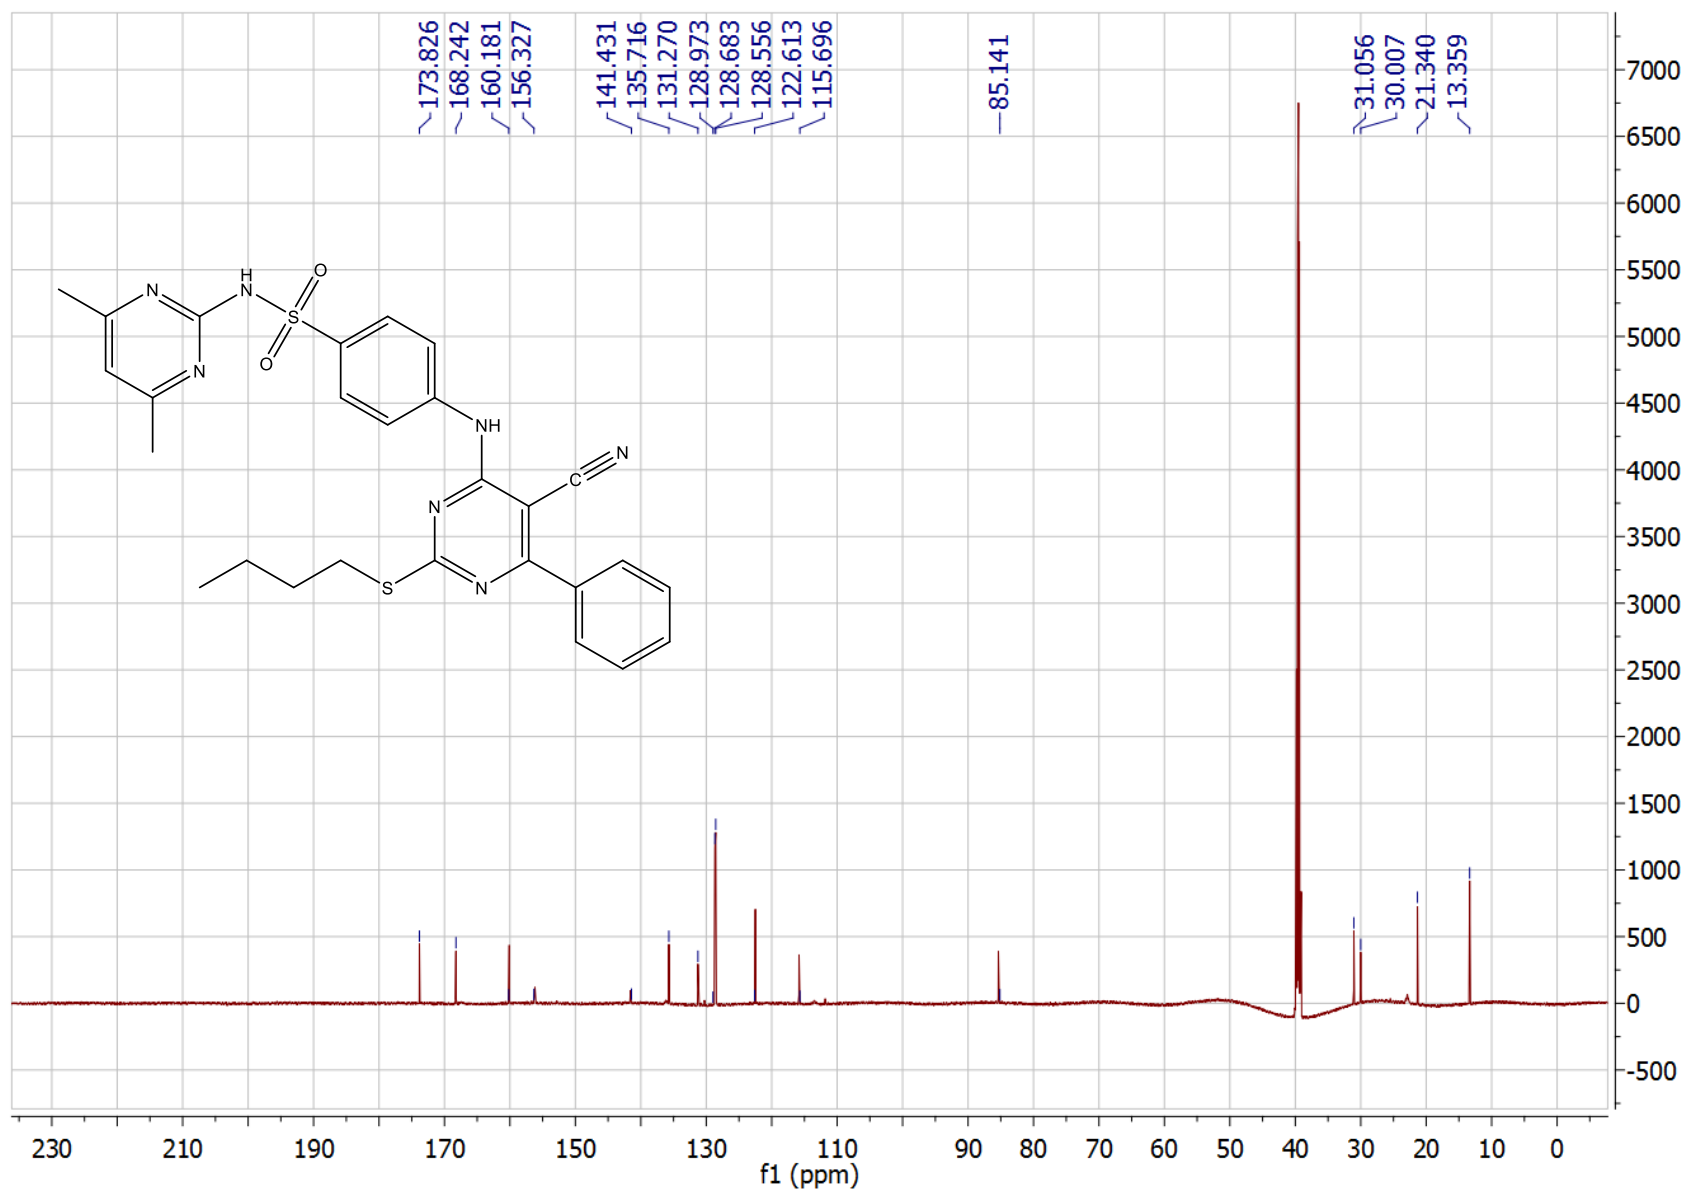



<sup>13</sup>C NMR of compound 16b

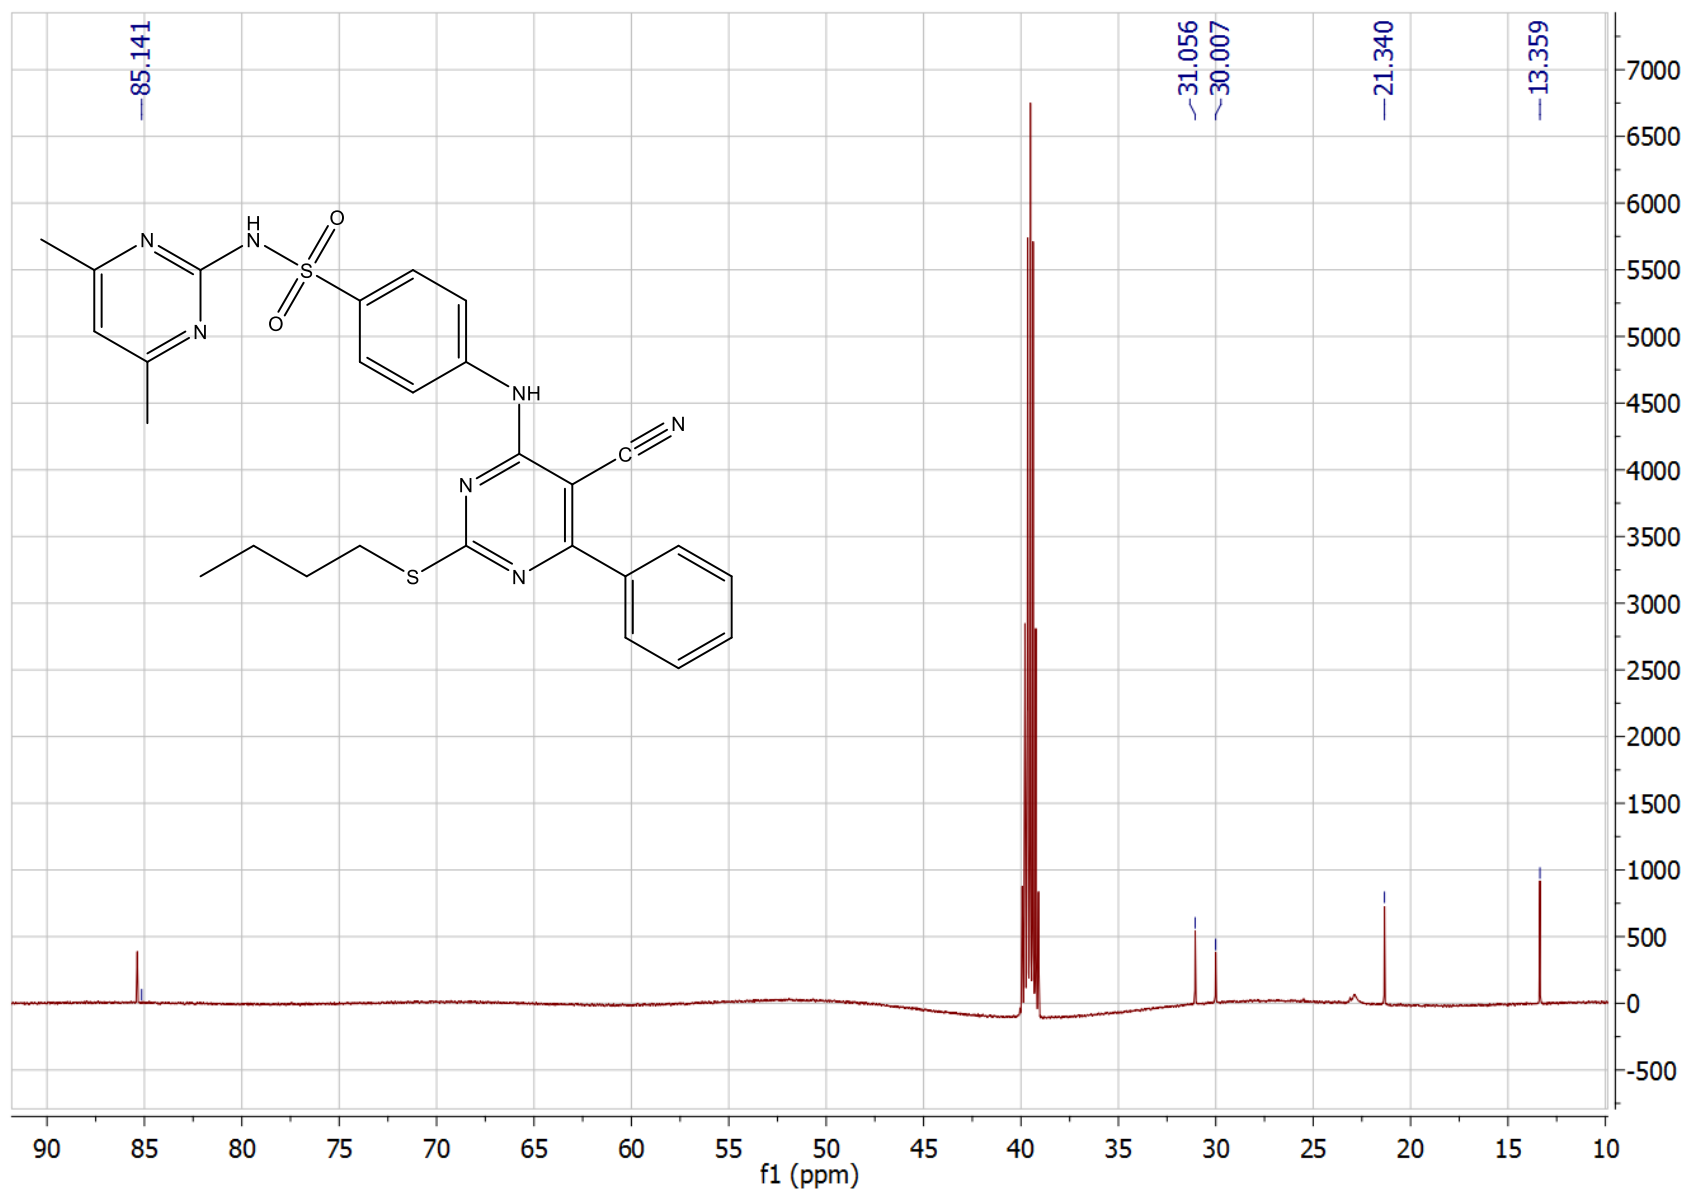

**<sup>13</sup>C NMR of compound 16b**

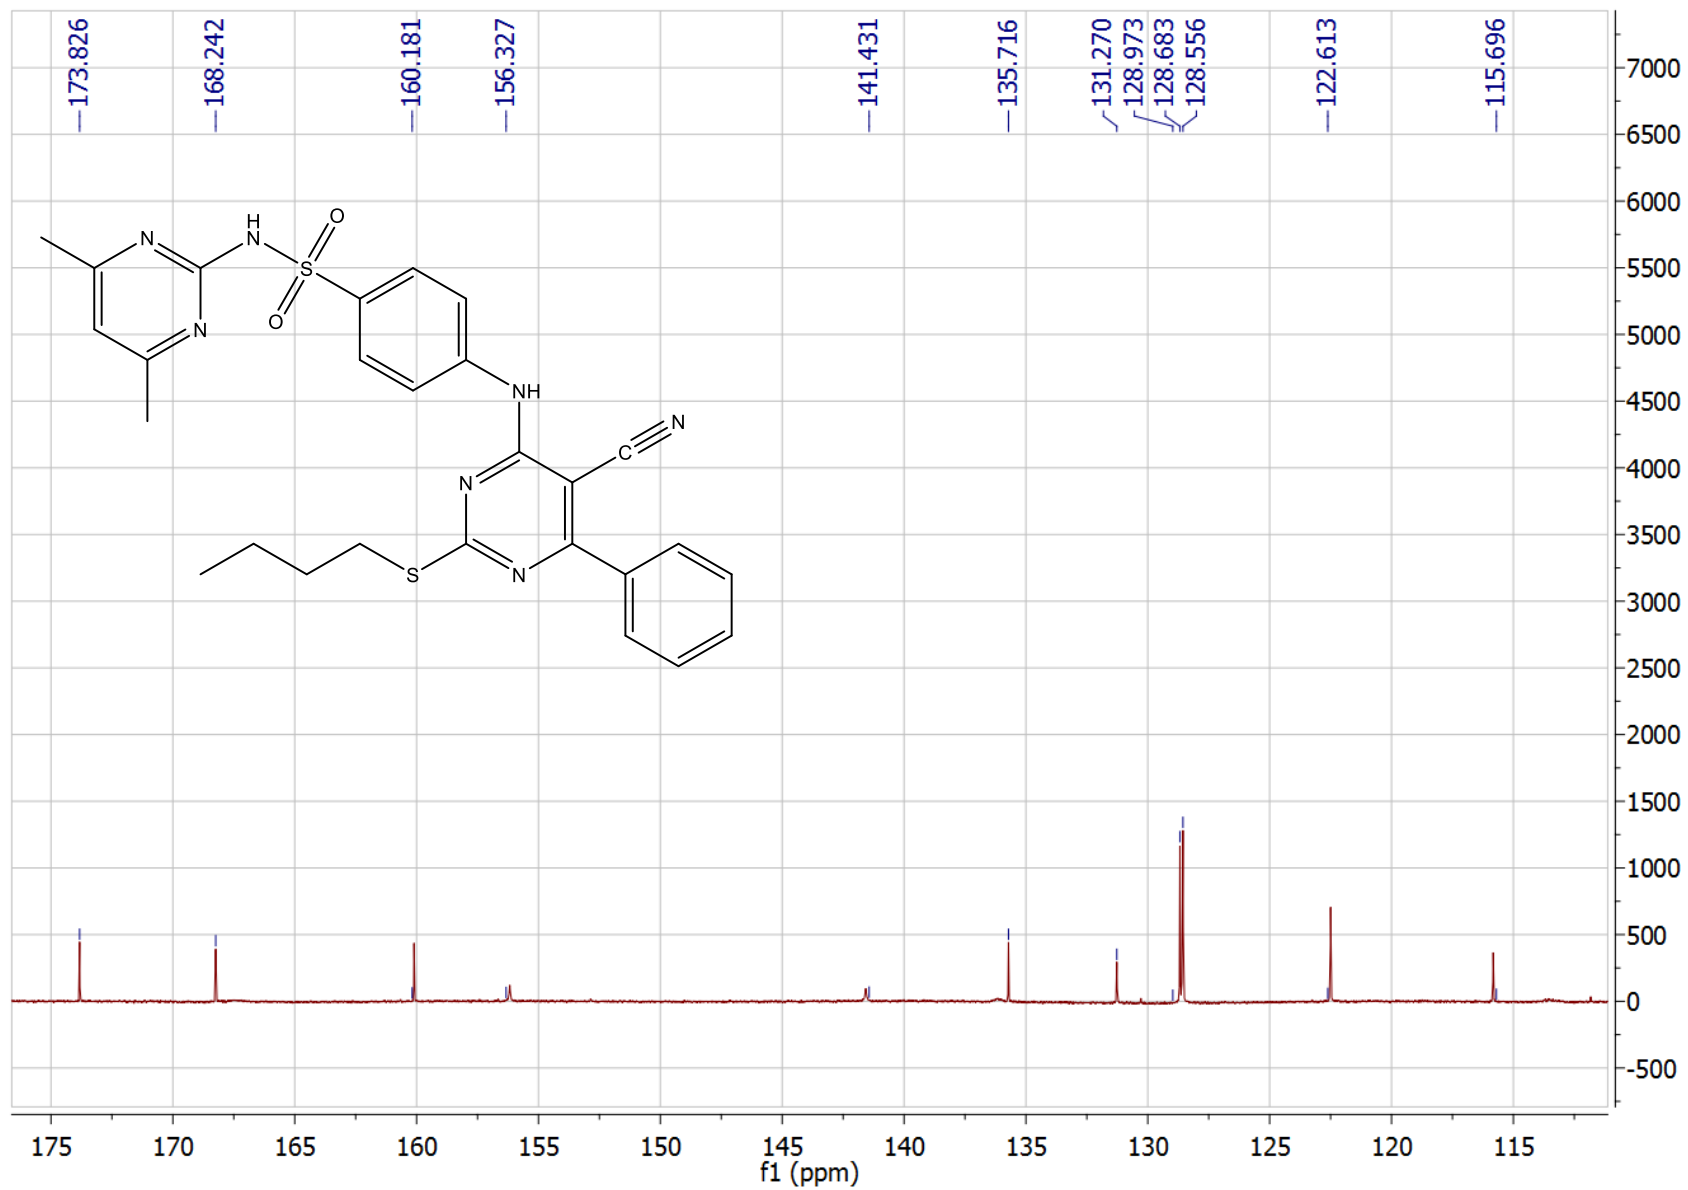

# APT of compound 16b

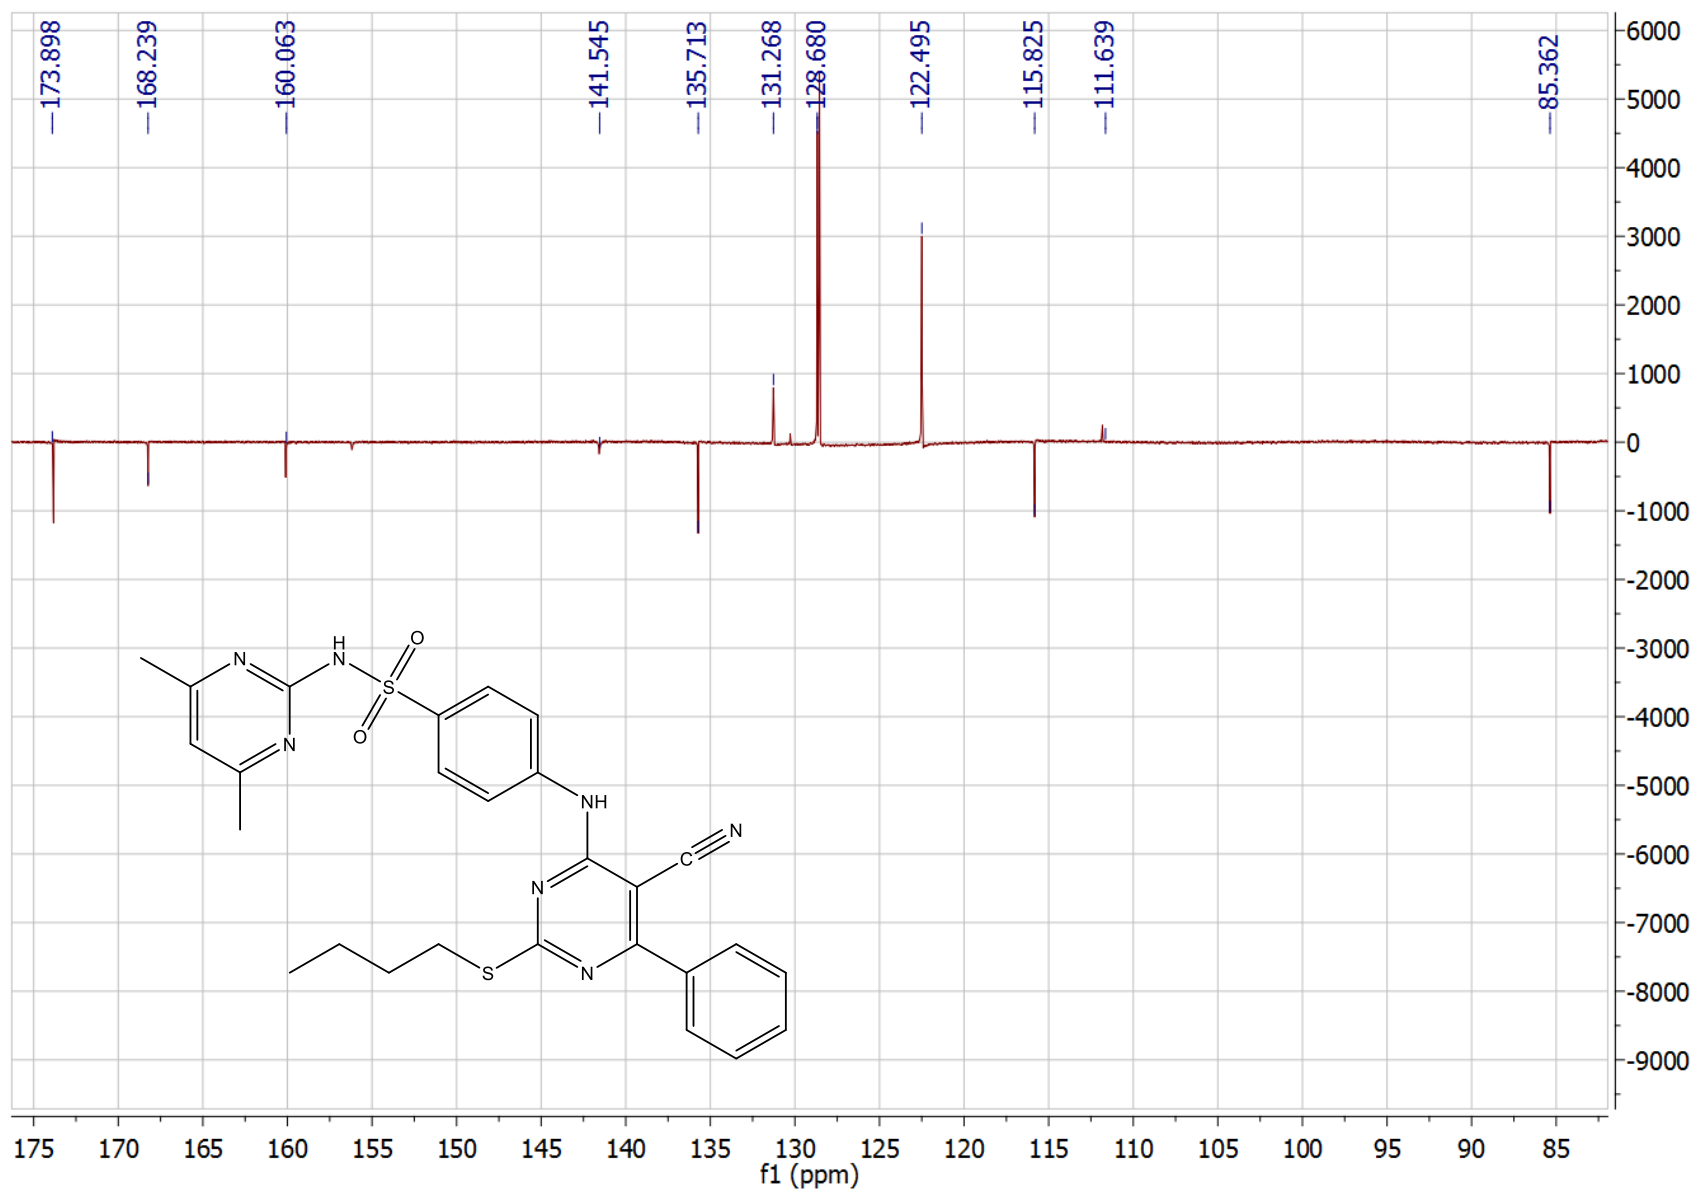

<sup>1</sup>H NMR of compound 17<sub>a</sub>

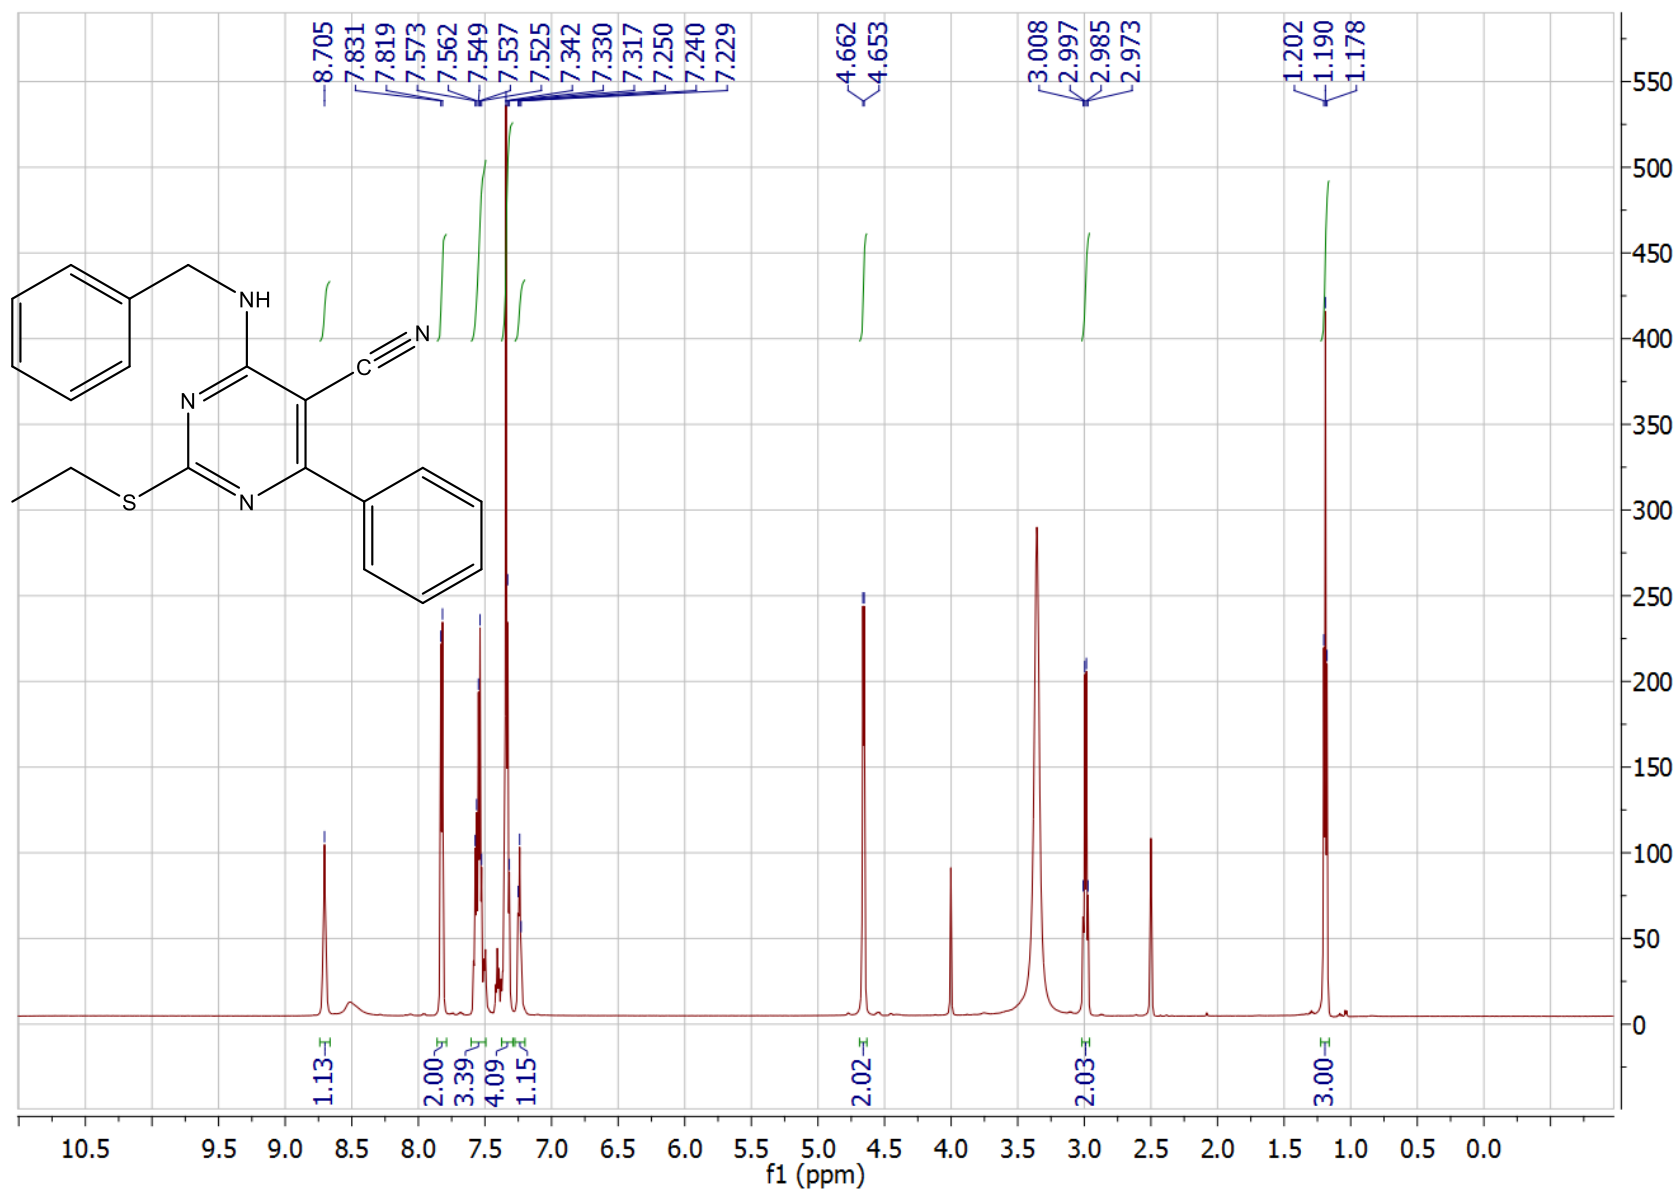

<sup>1</sup>H NMR of compound 17<sub>a</sub>

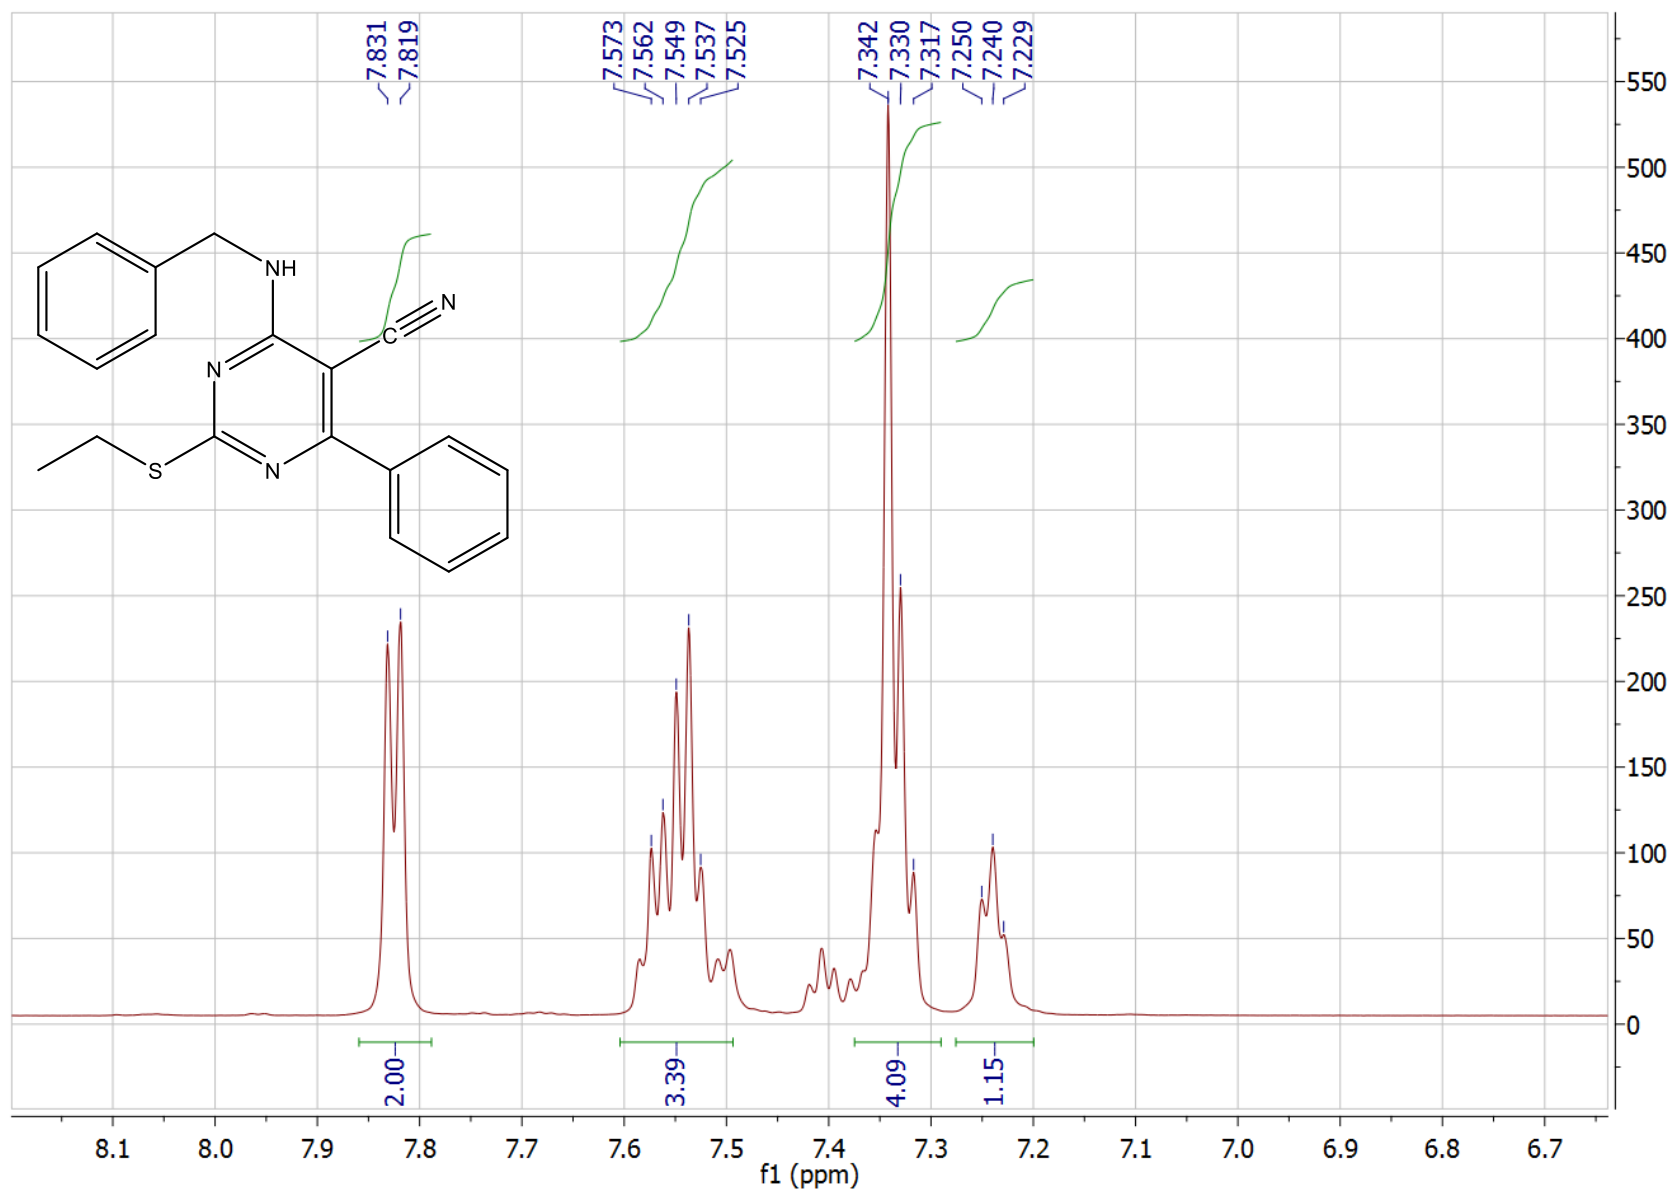

<sup>13</sup>C NMR of compound 17<sub>a</sub>

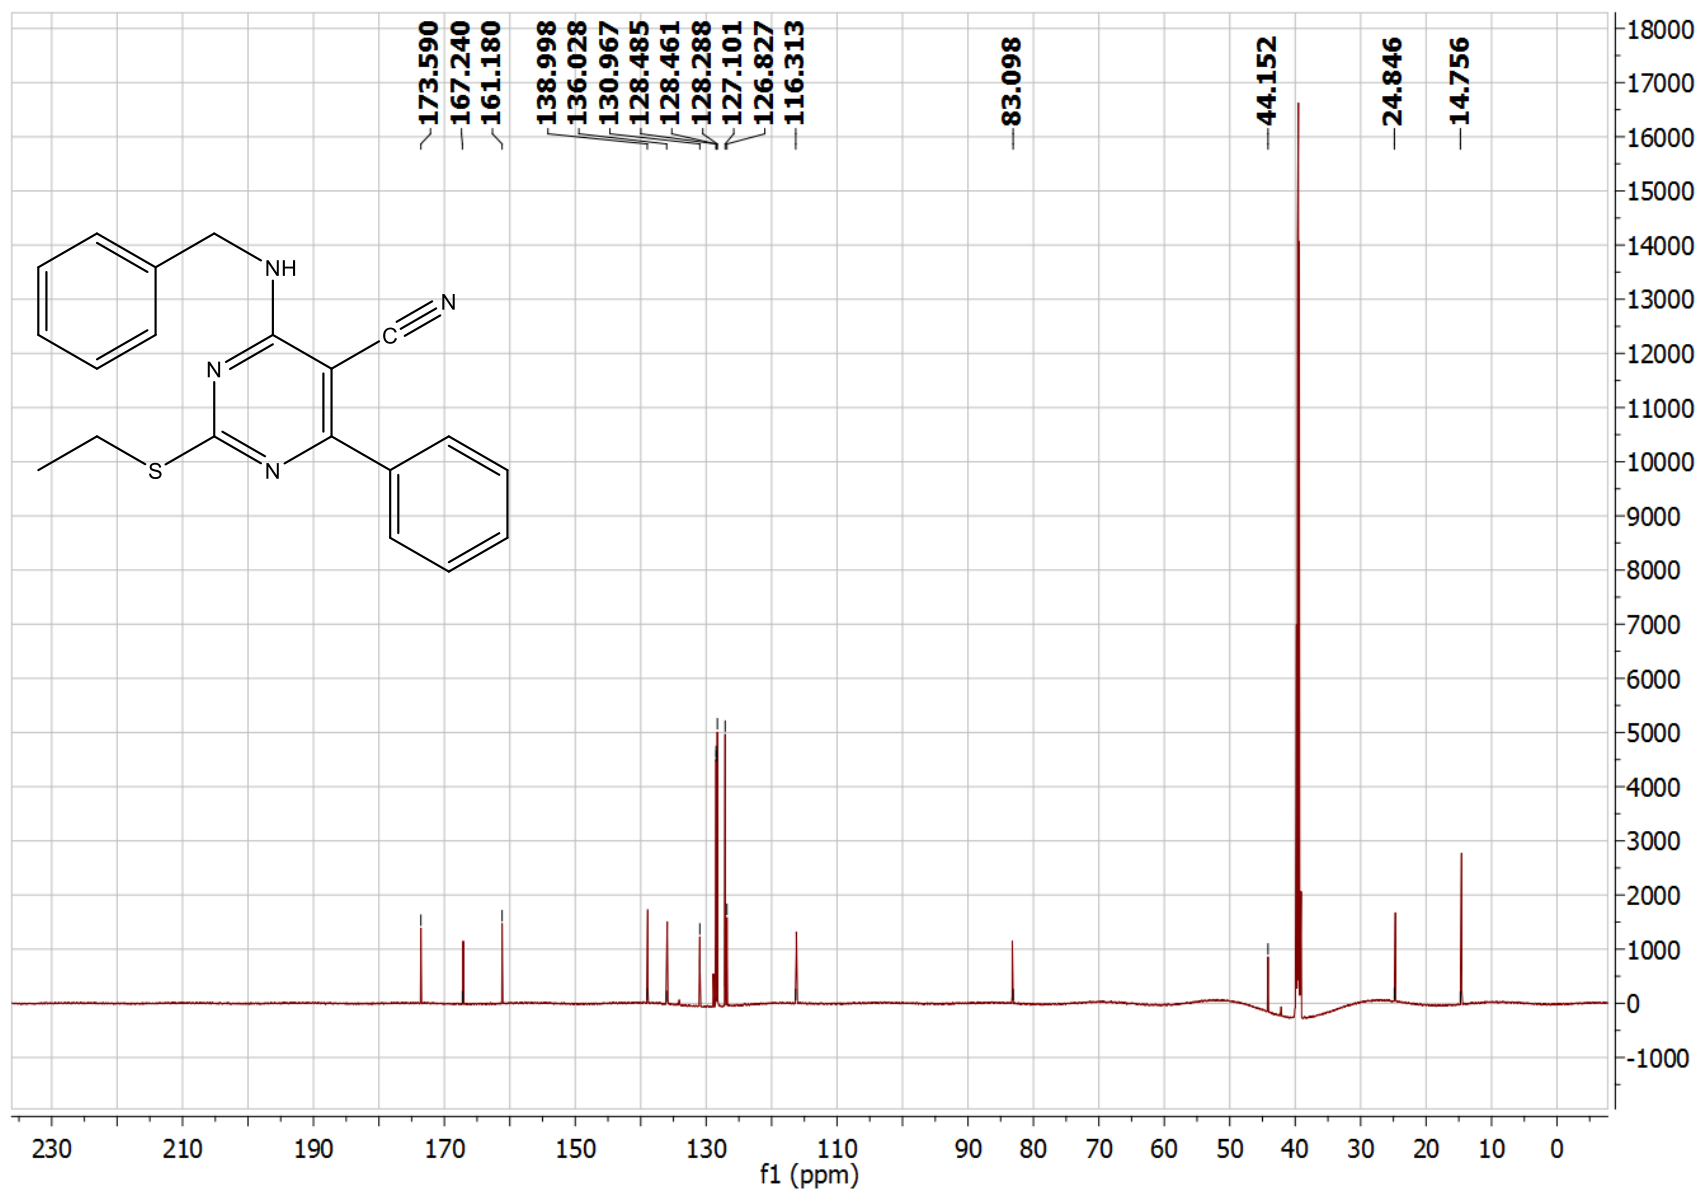

<sup>13</sup>C NMR of compound 17<sub>a</sub>

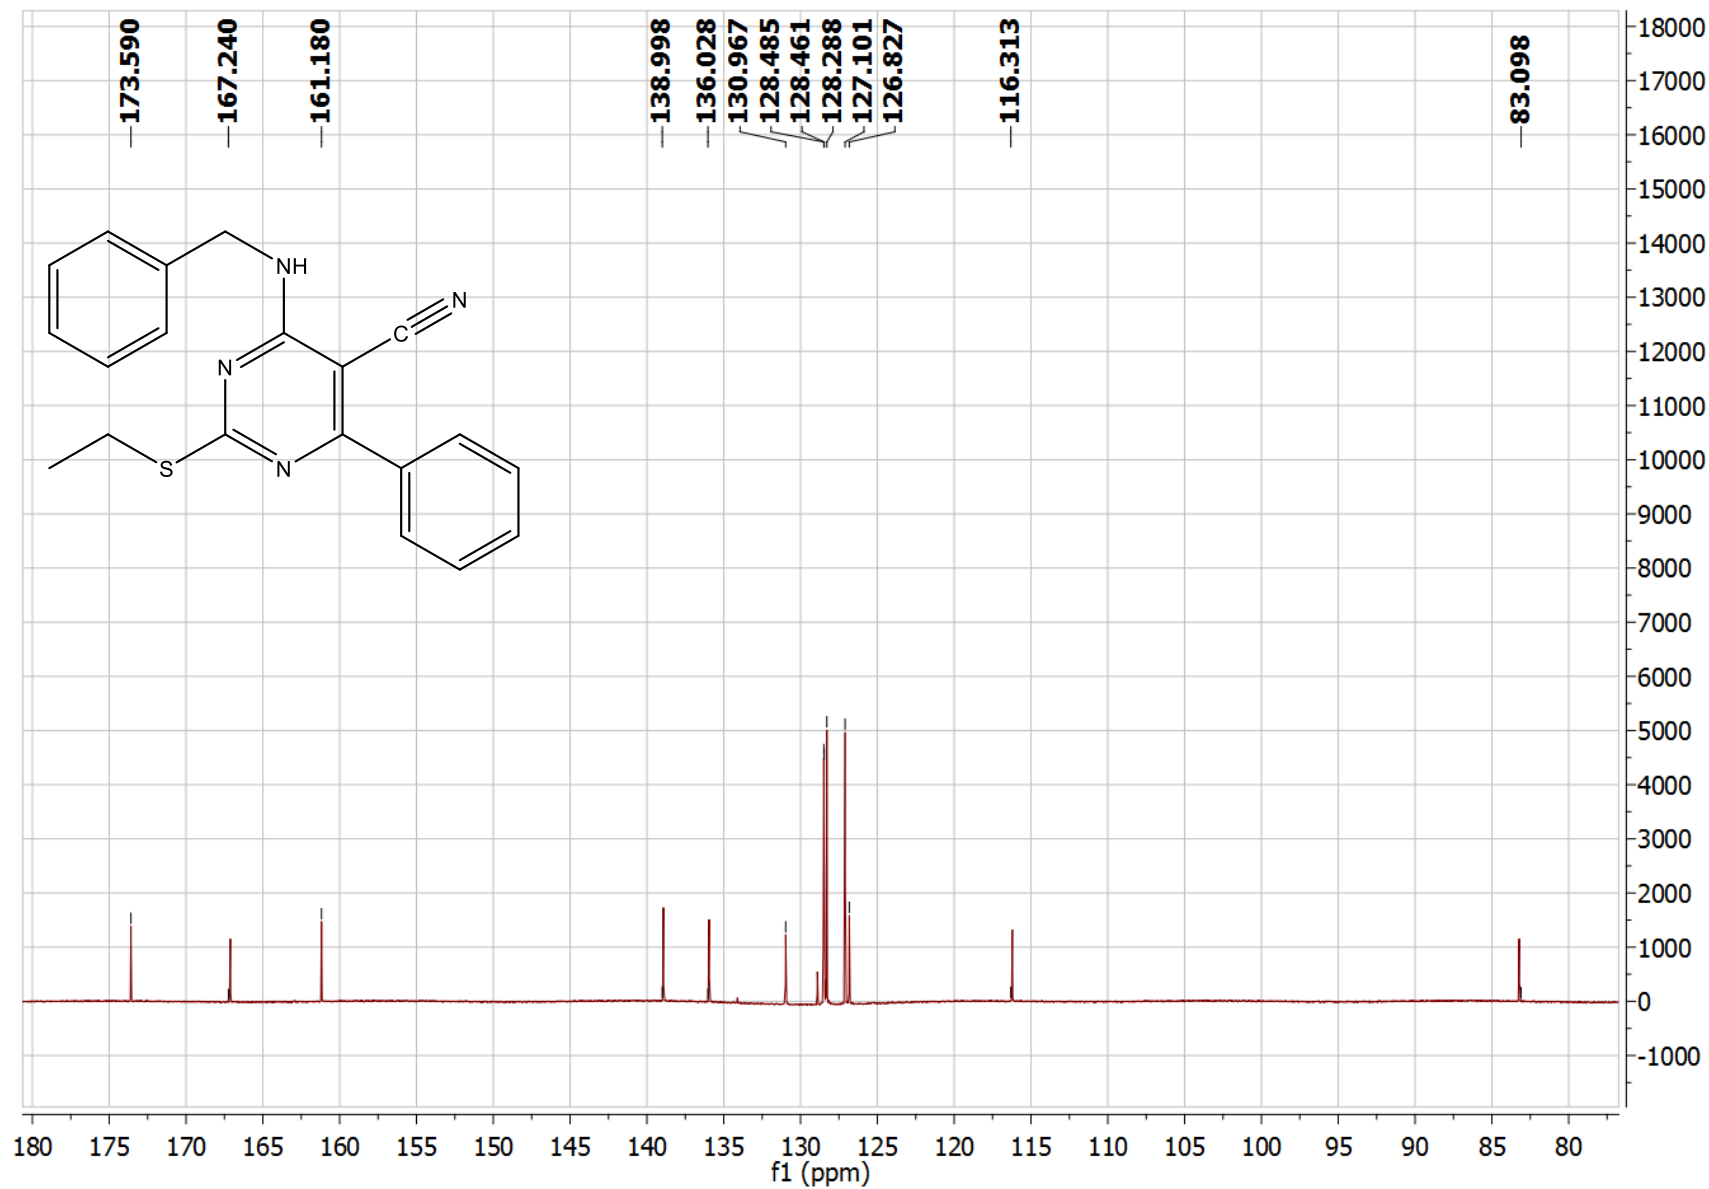

APT of compound 17<sub>a</sub>

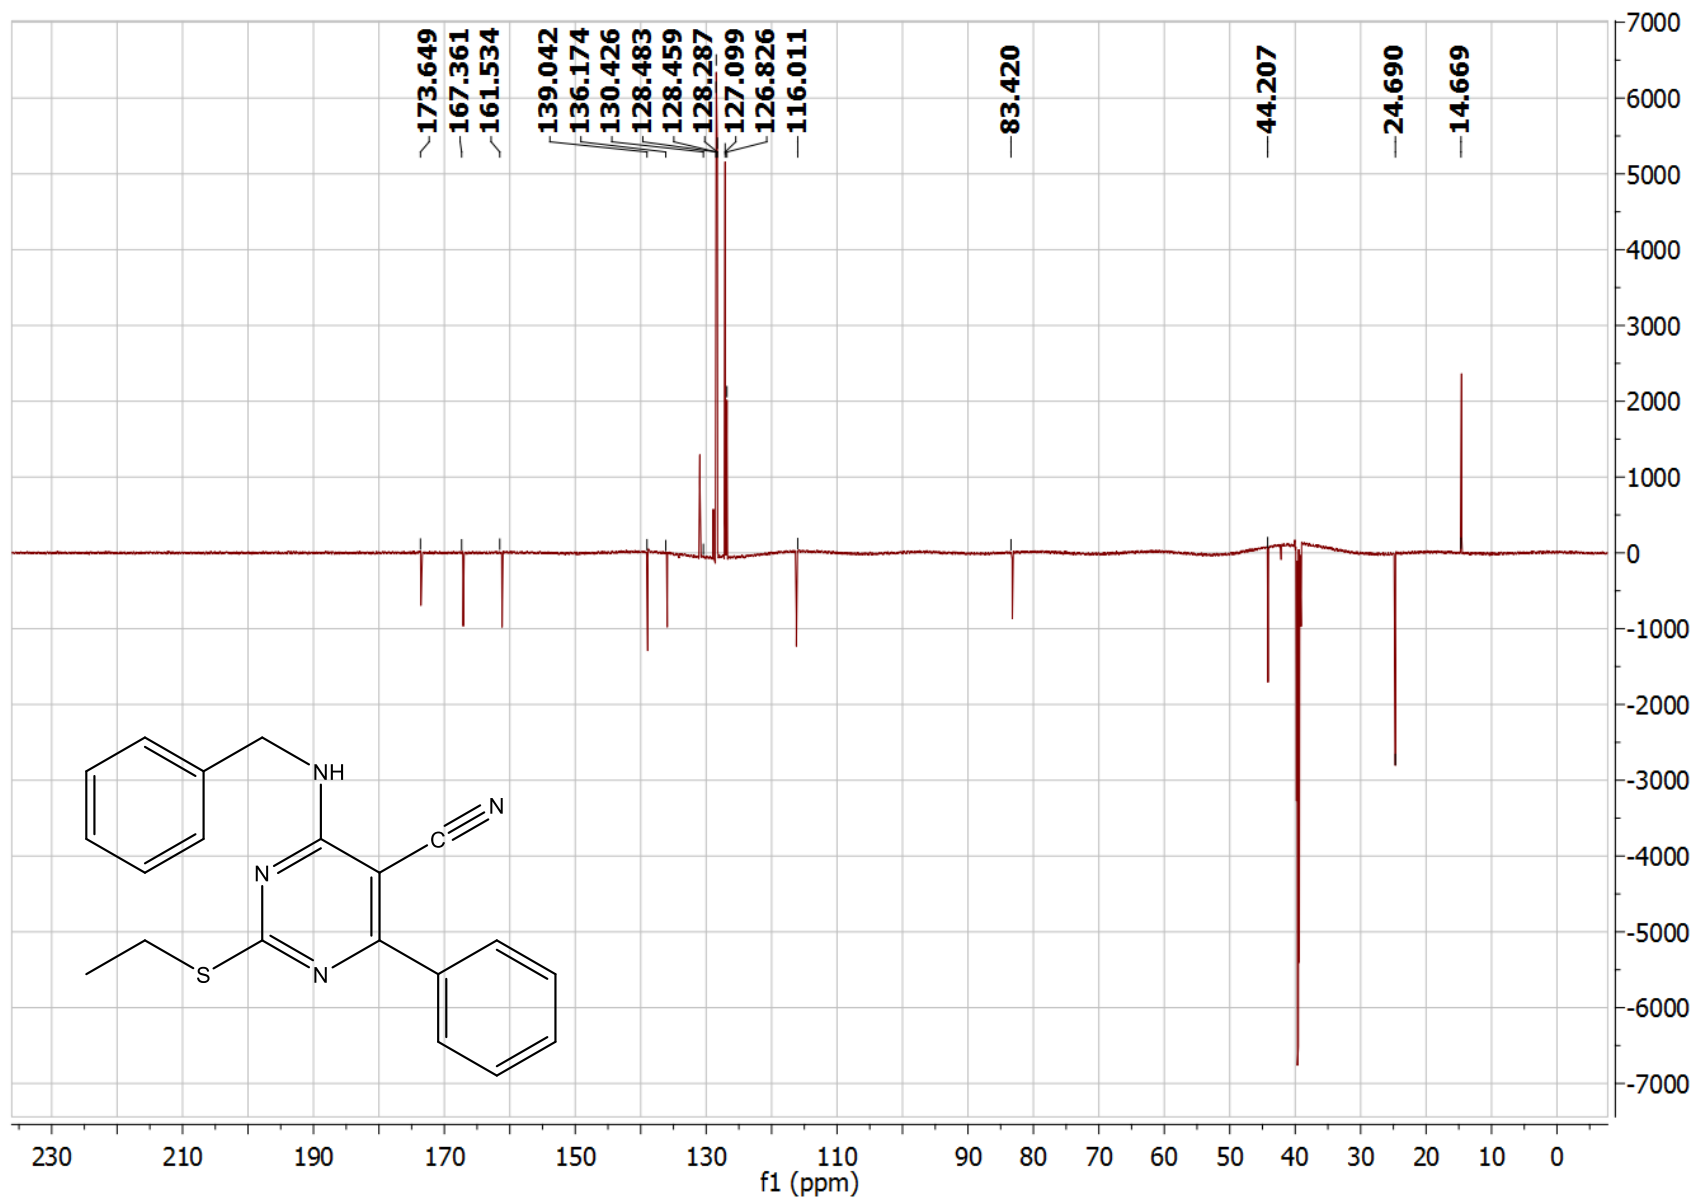



APT of compound 17<sub>a</sub>

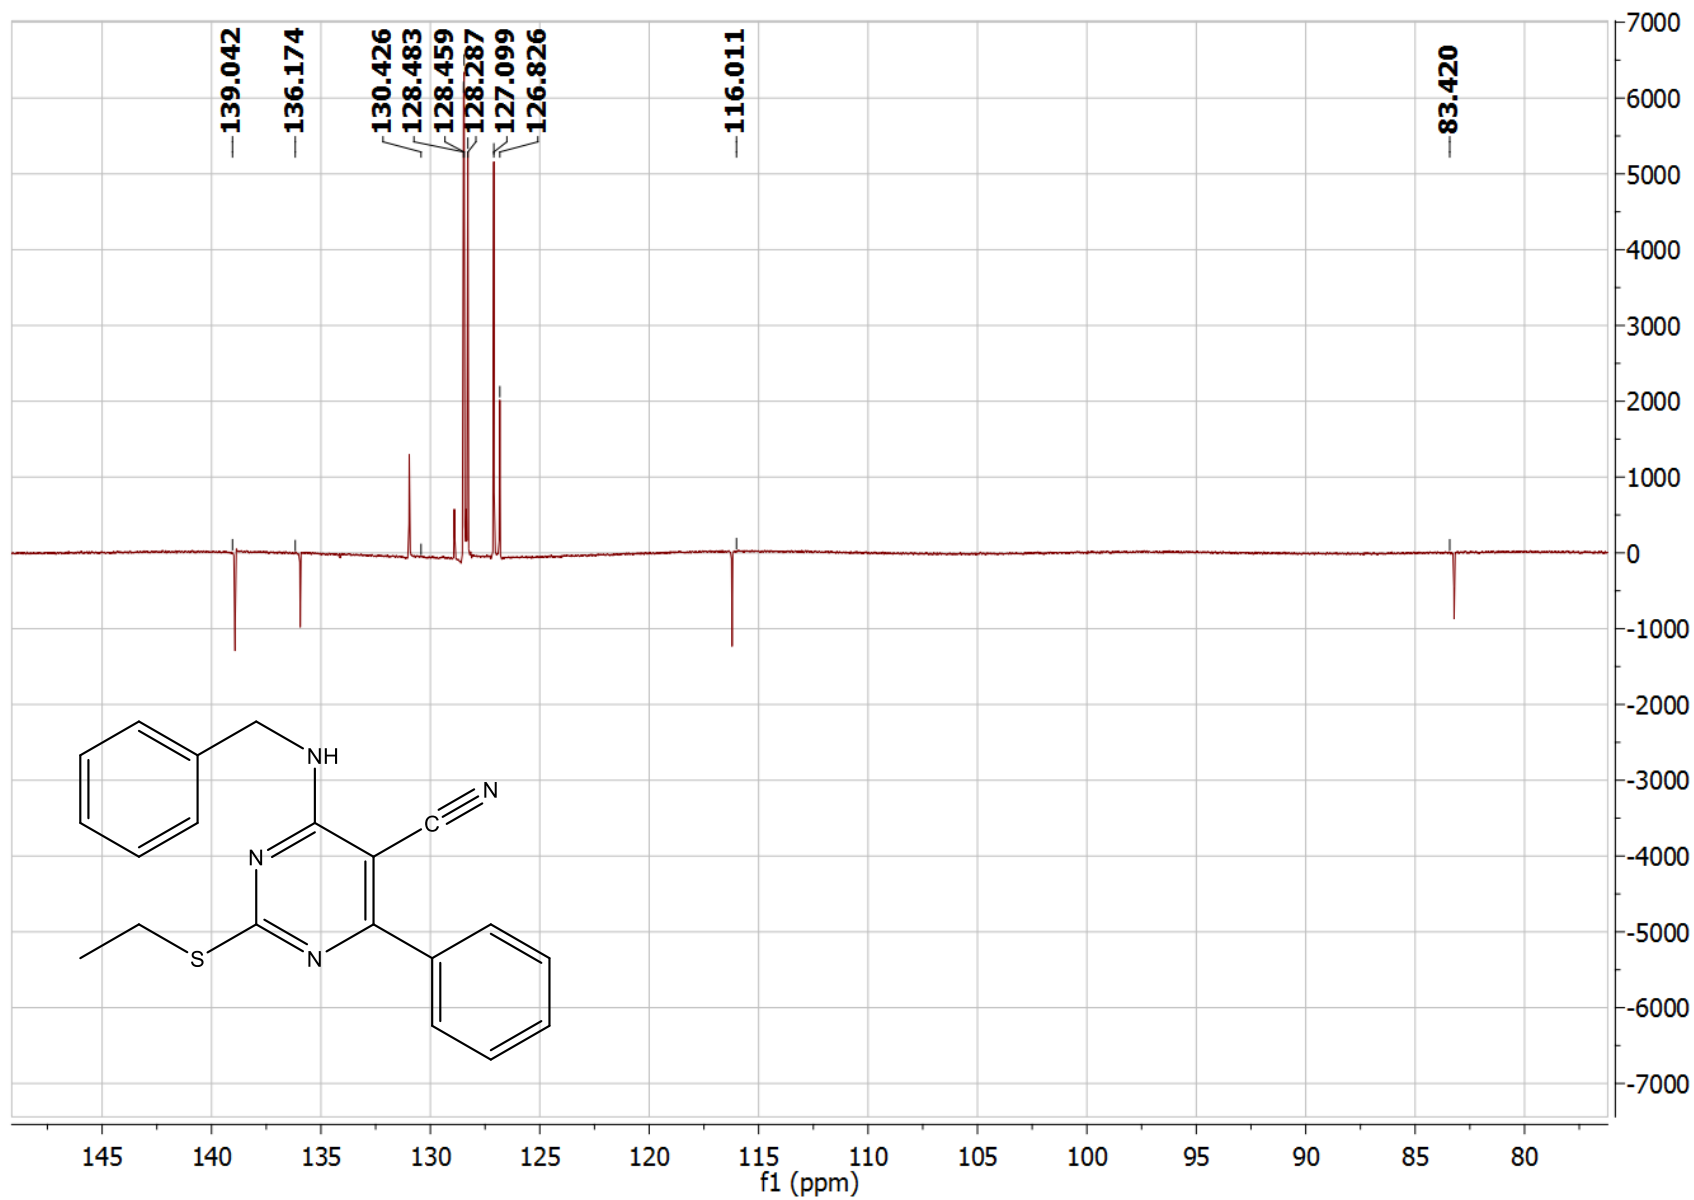

<sup>1</sup>H NMR of compound 17<sub>b</sub>

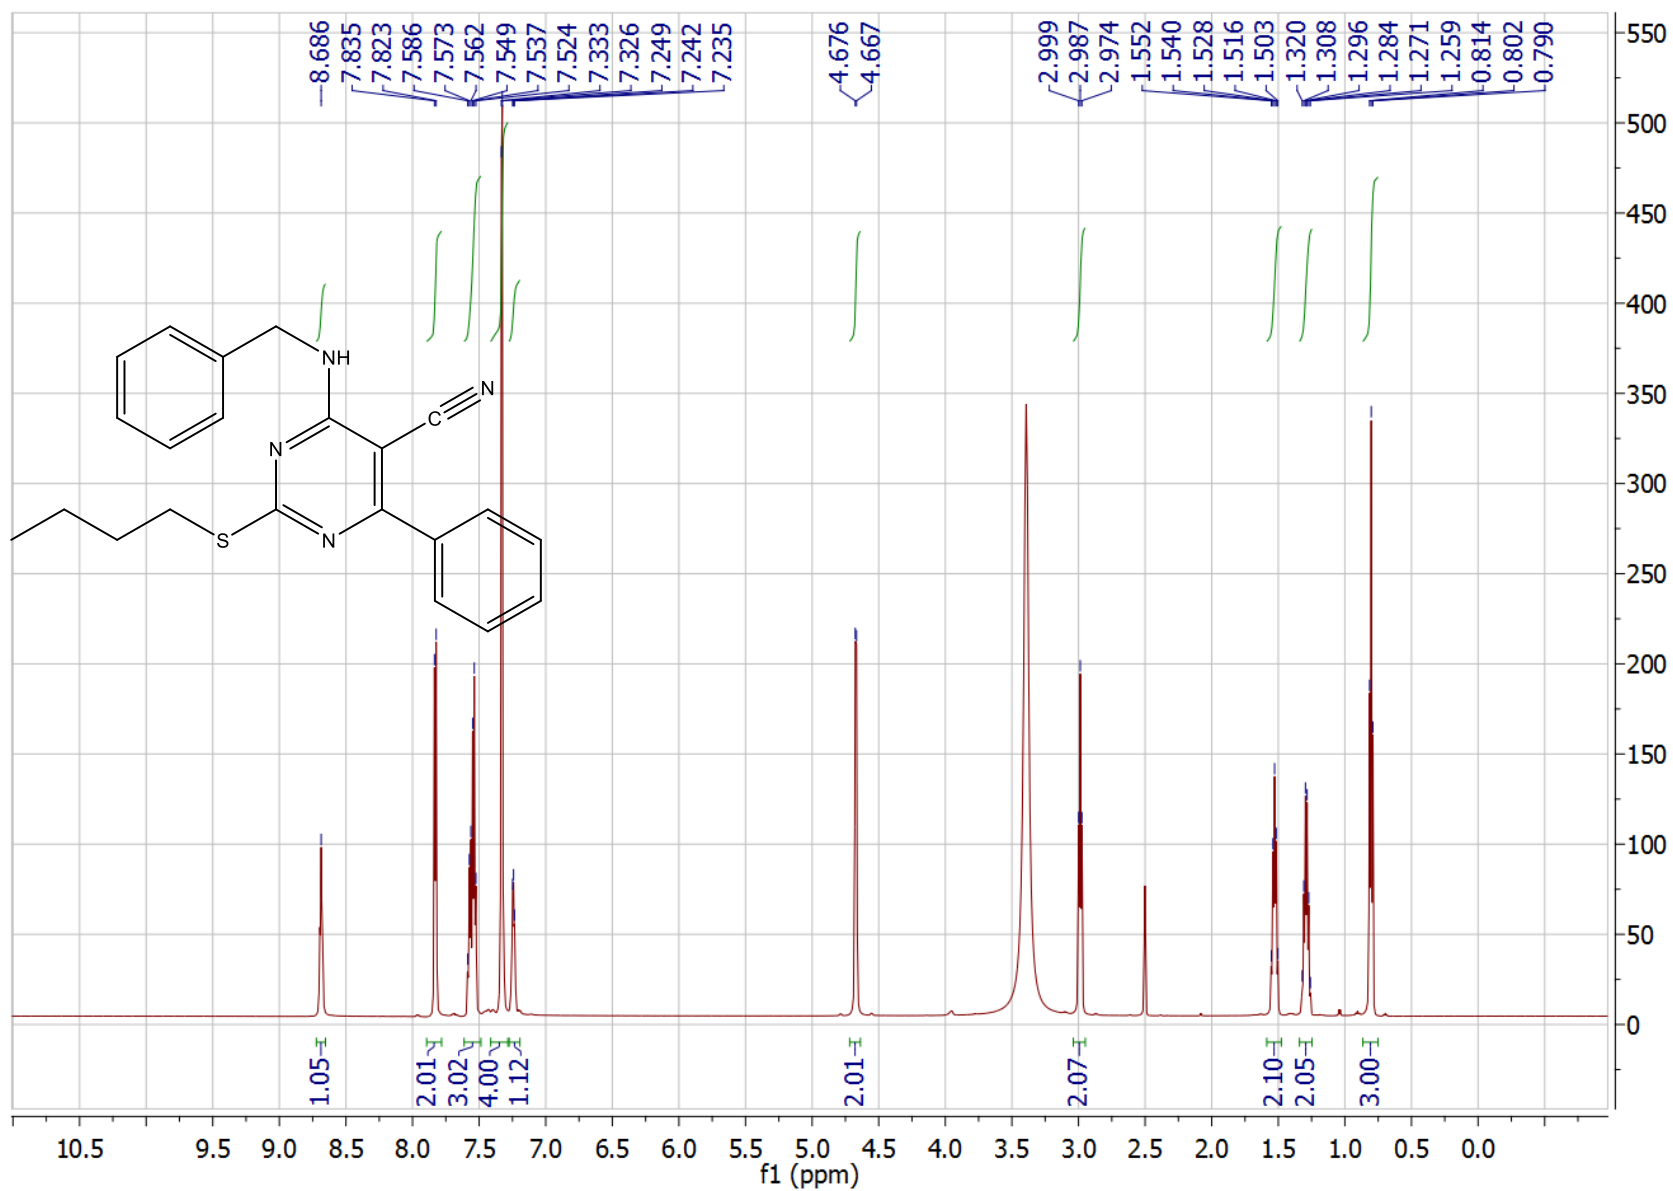

<sup>1</sup>H NMR of compound 17<sub>b</sub>

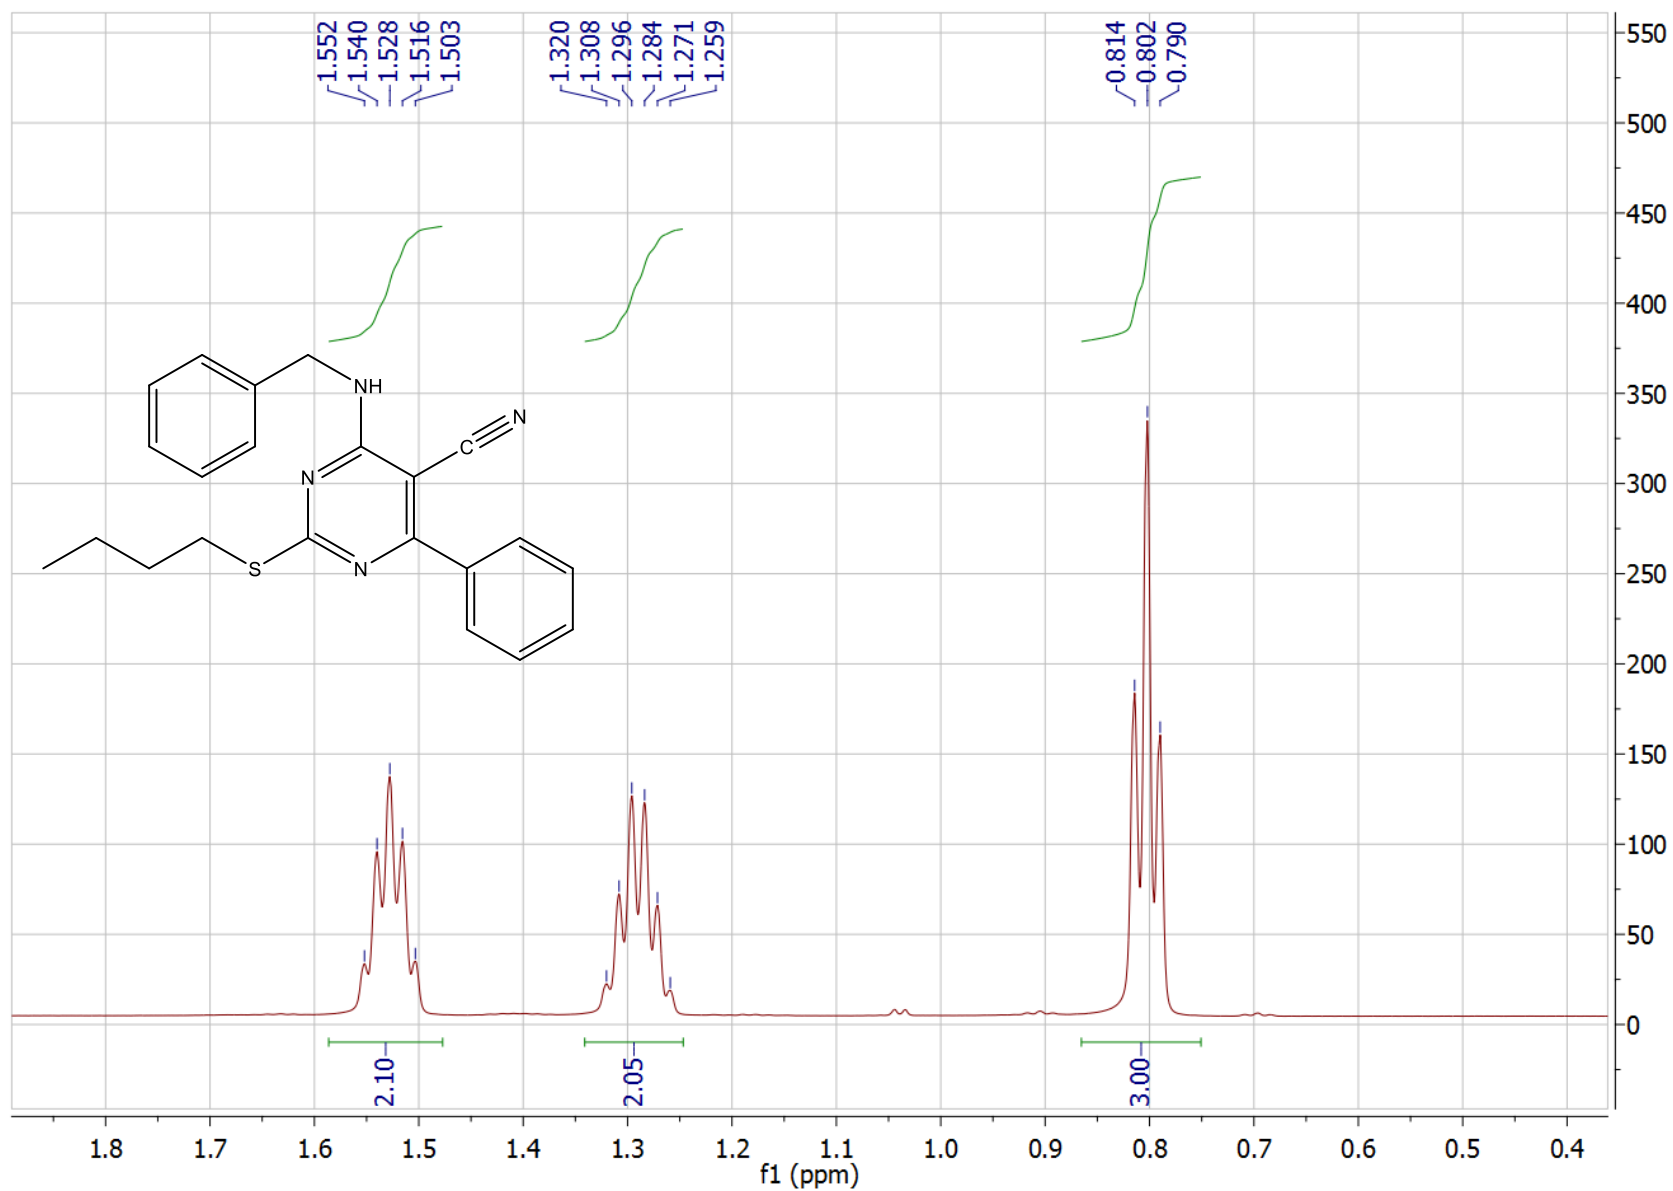

<sup>1</sup>H NMR of compound 17<sub>b</sub>

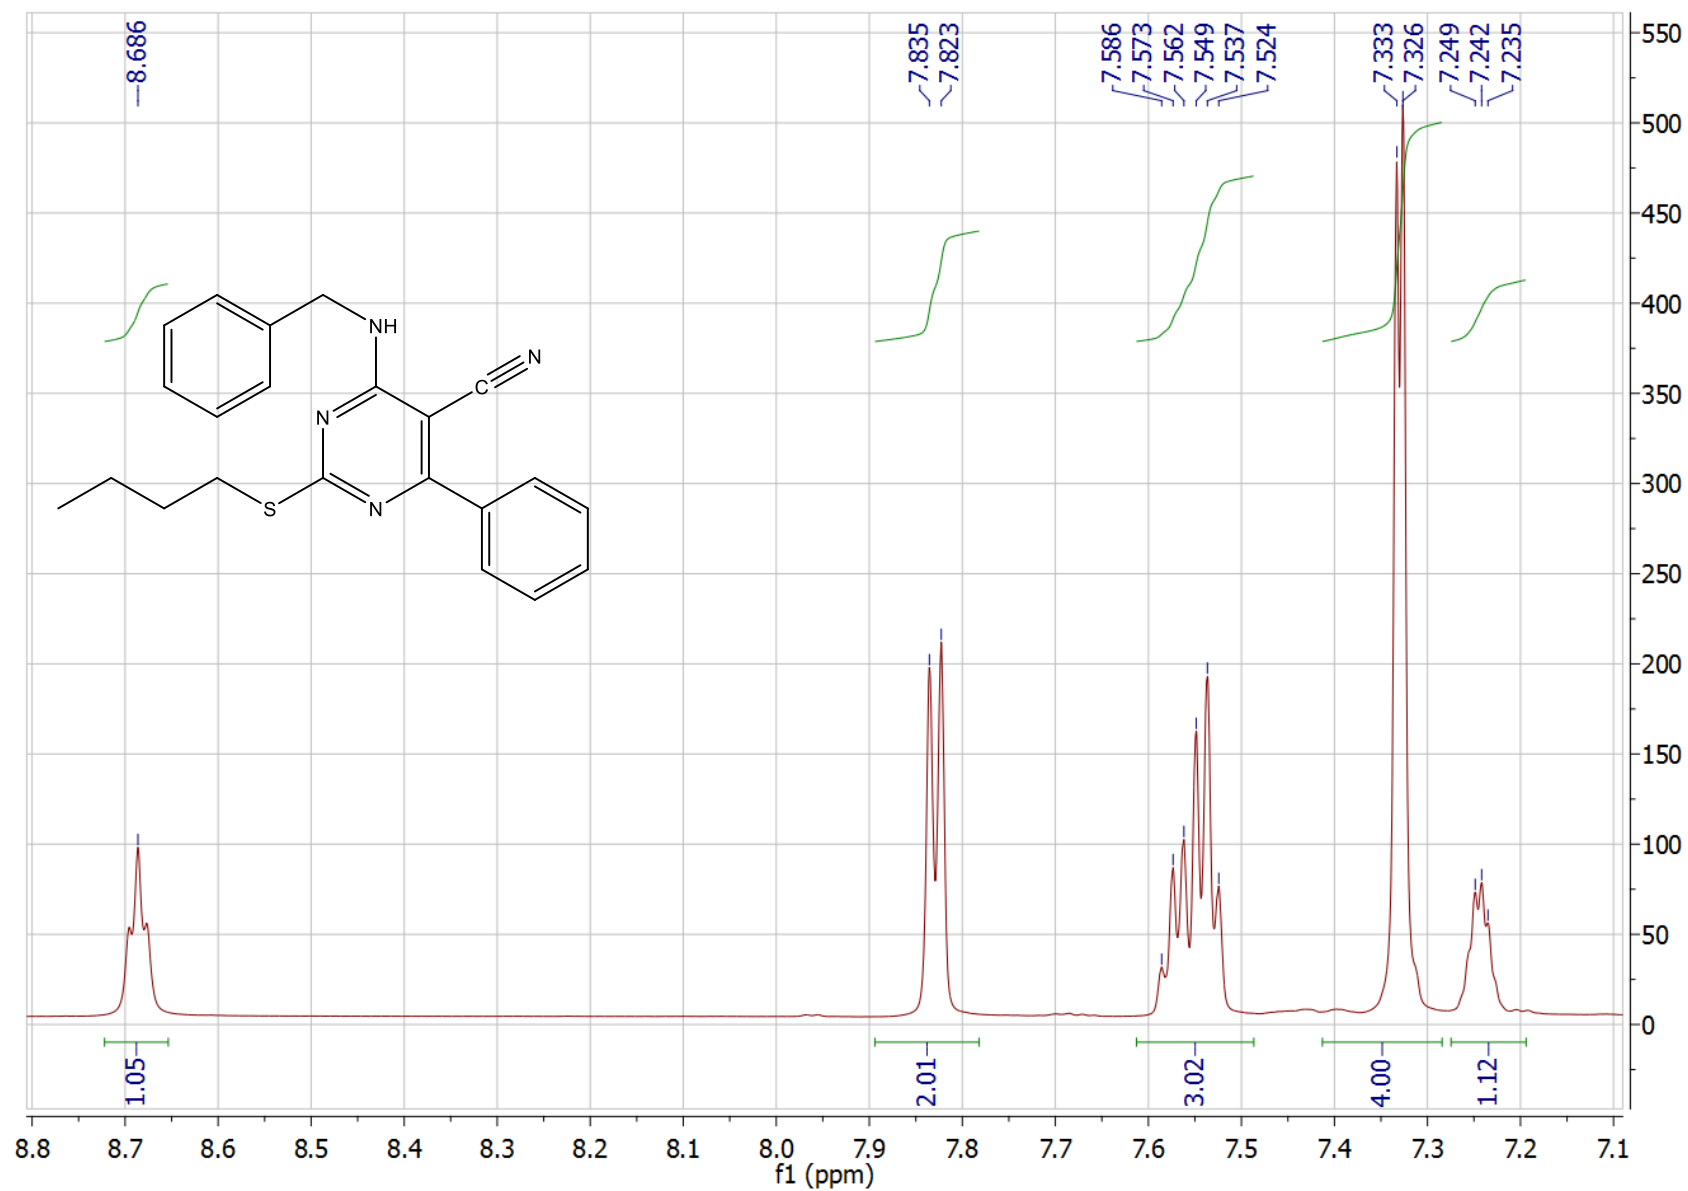

<sup>13</sup>C NMR of compound 17<sub>b</sub>

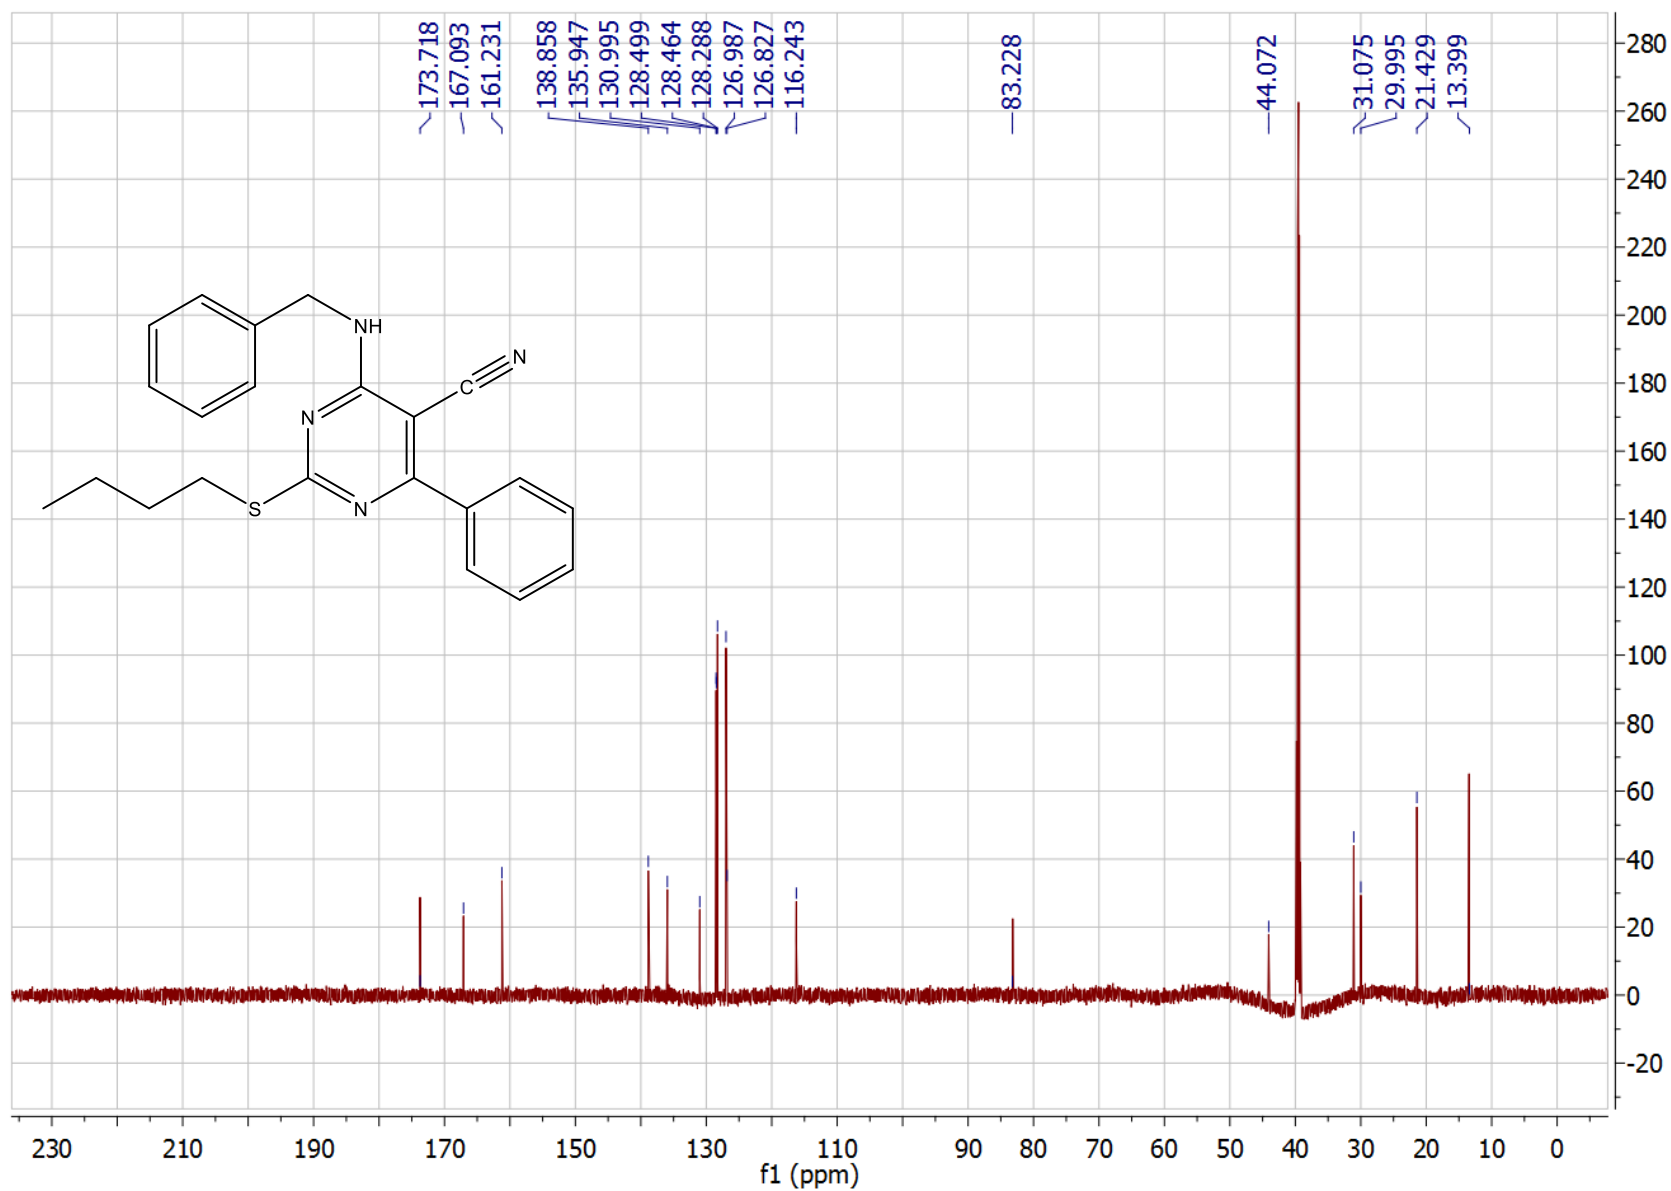

APT of compound 17<sub>b</sub>

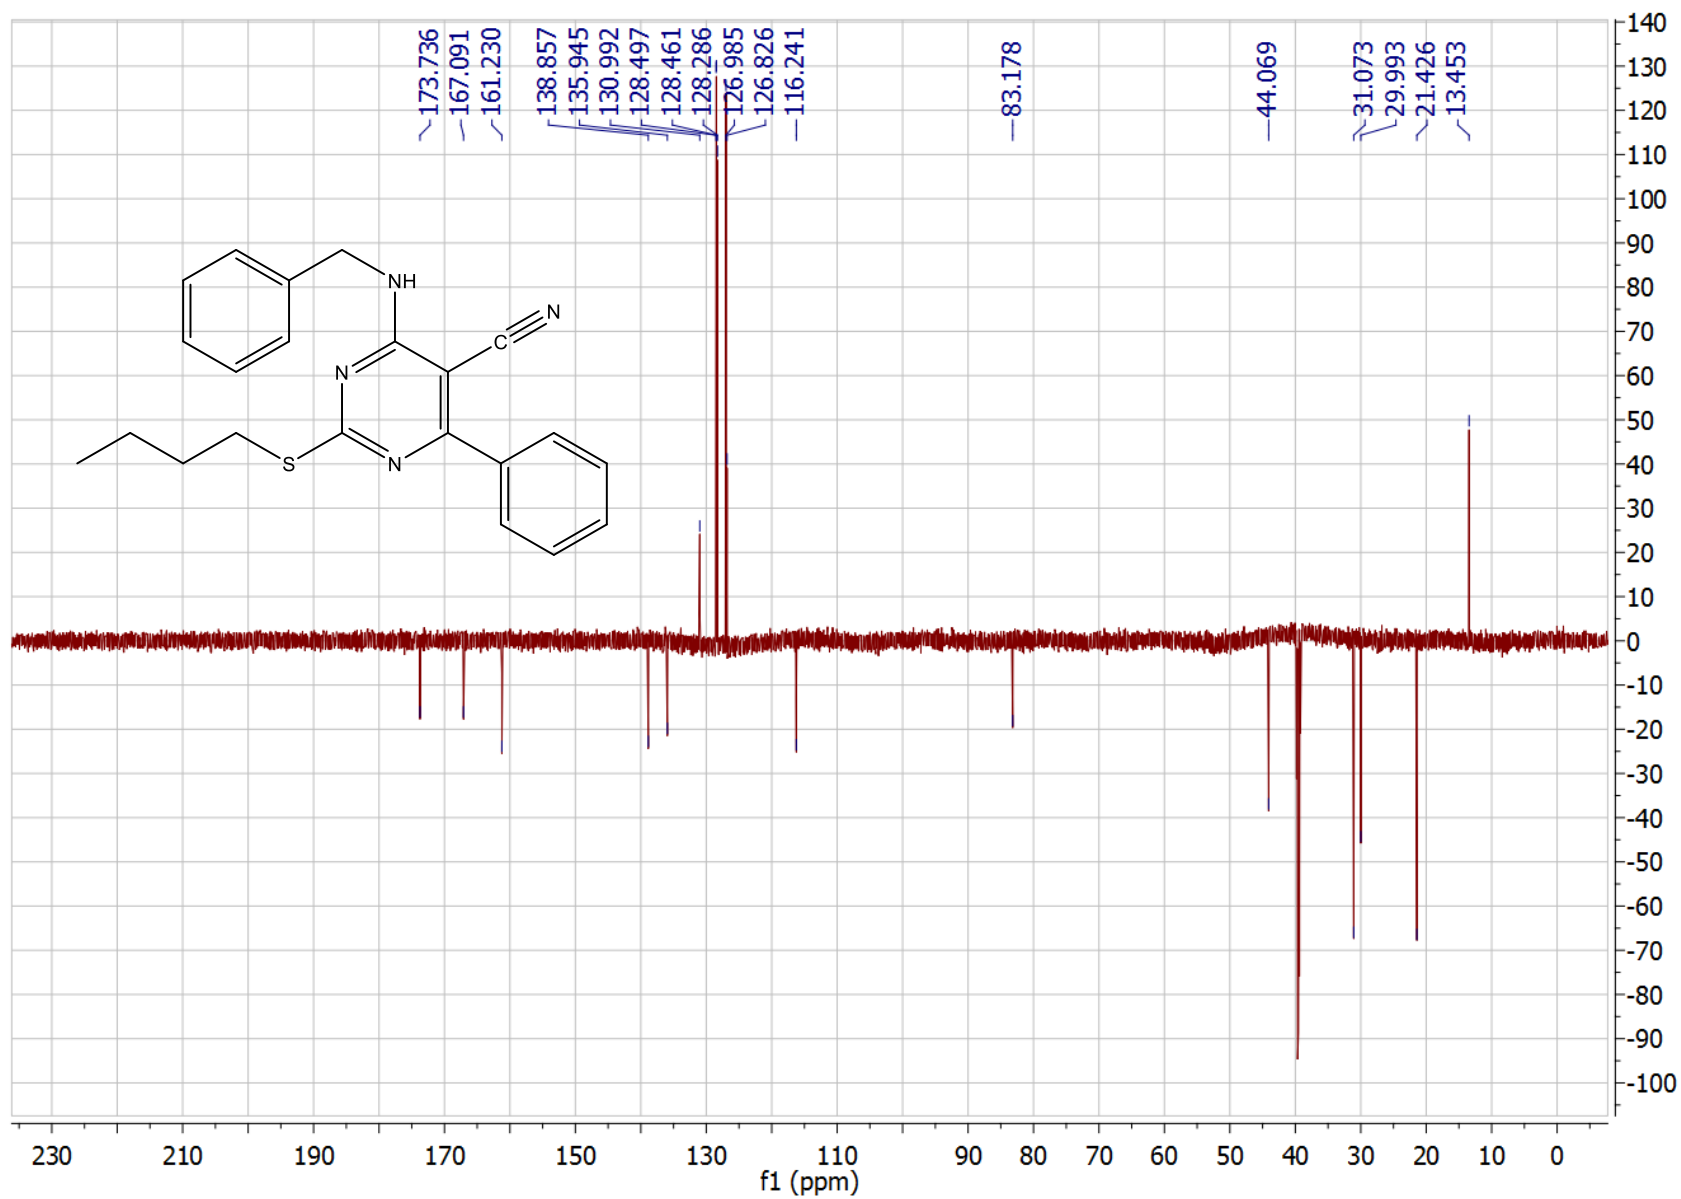

APT of compound 17<sub>b</sub>

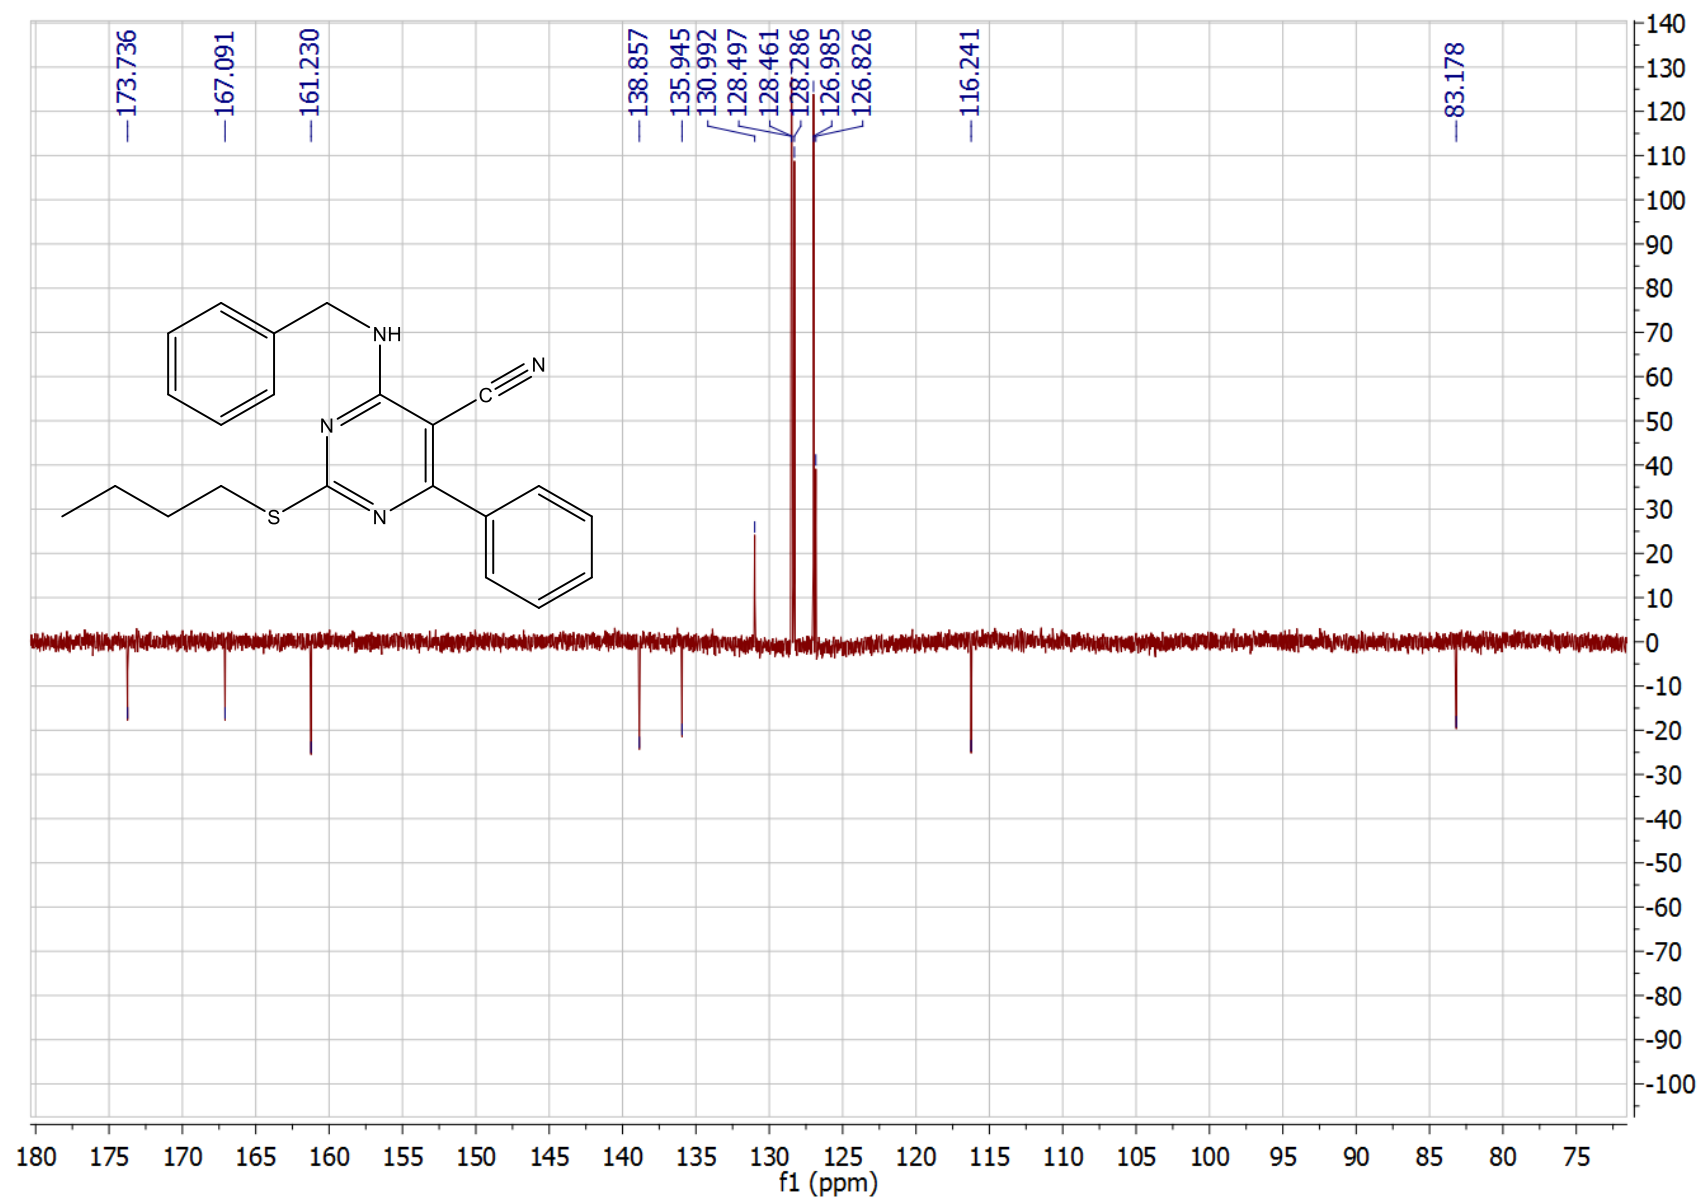

<sup>1</sup>H NMR of compound 18<sub>a</sub>

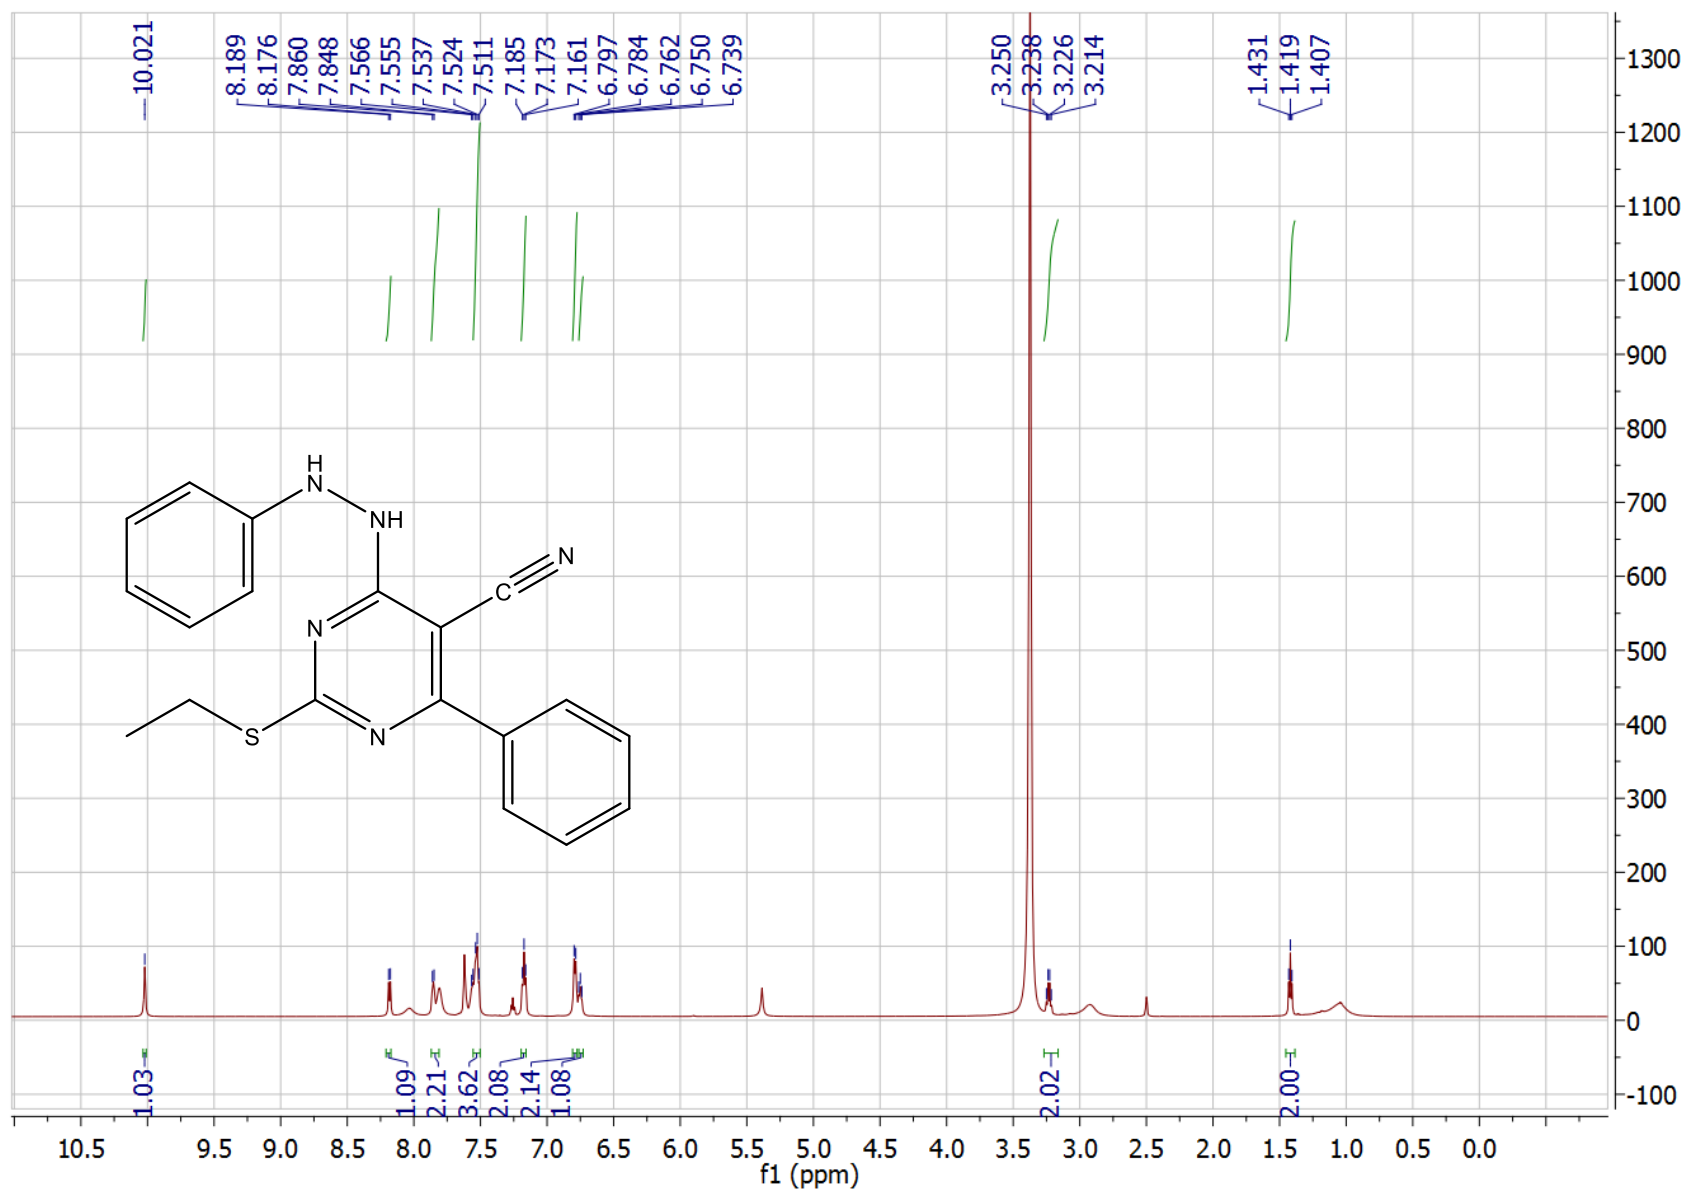



<sup>1</sup>H NMR of compound 18<sub>a</sub>

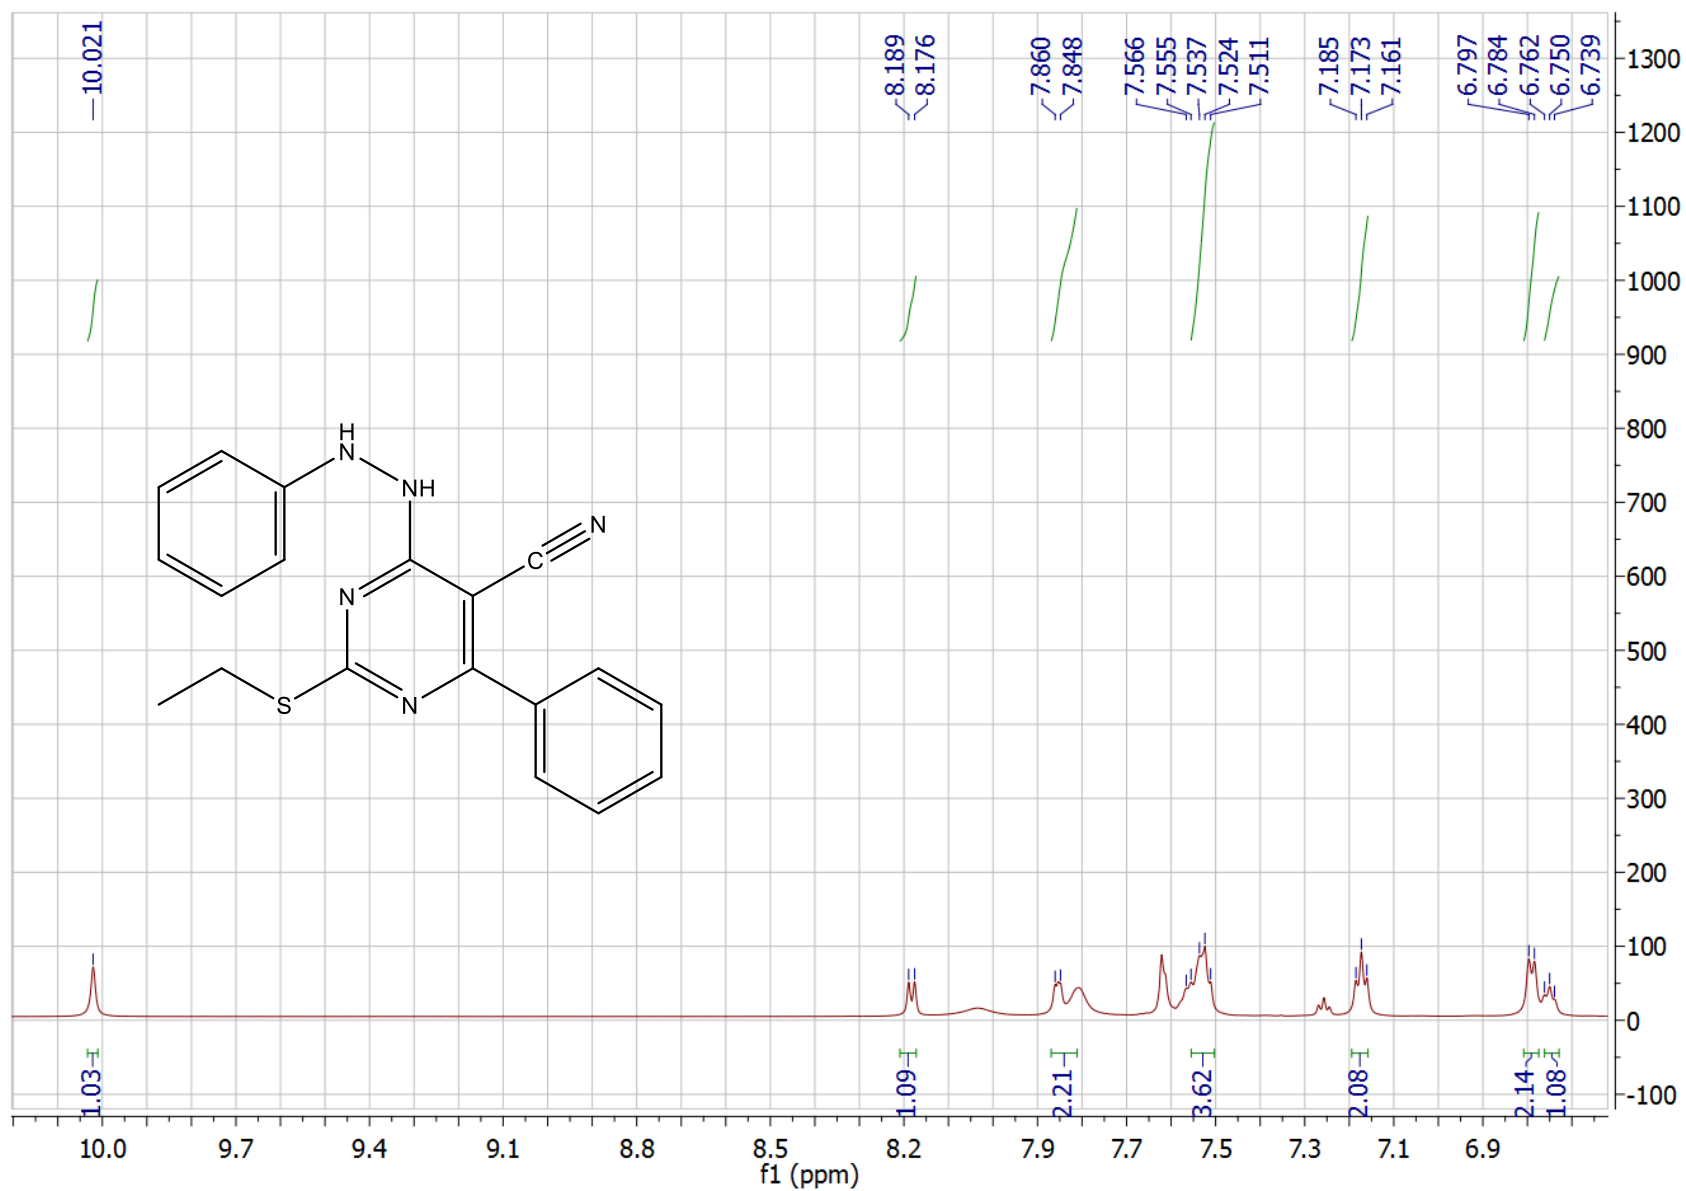

**<sup>13</sup>C NMR of compound 18<sub>a</sub>**

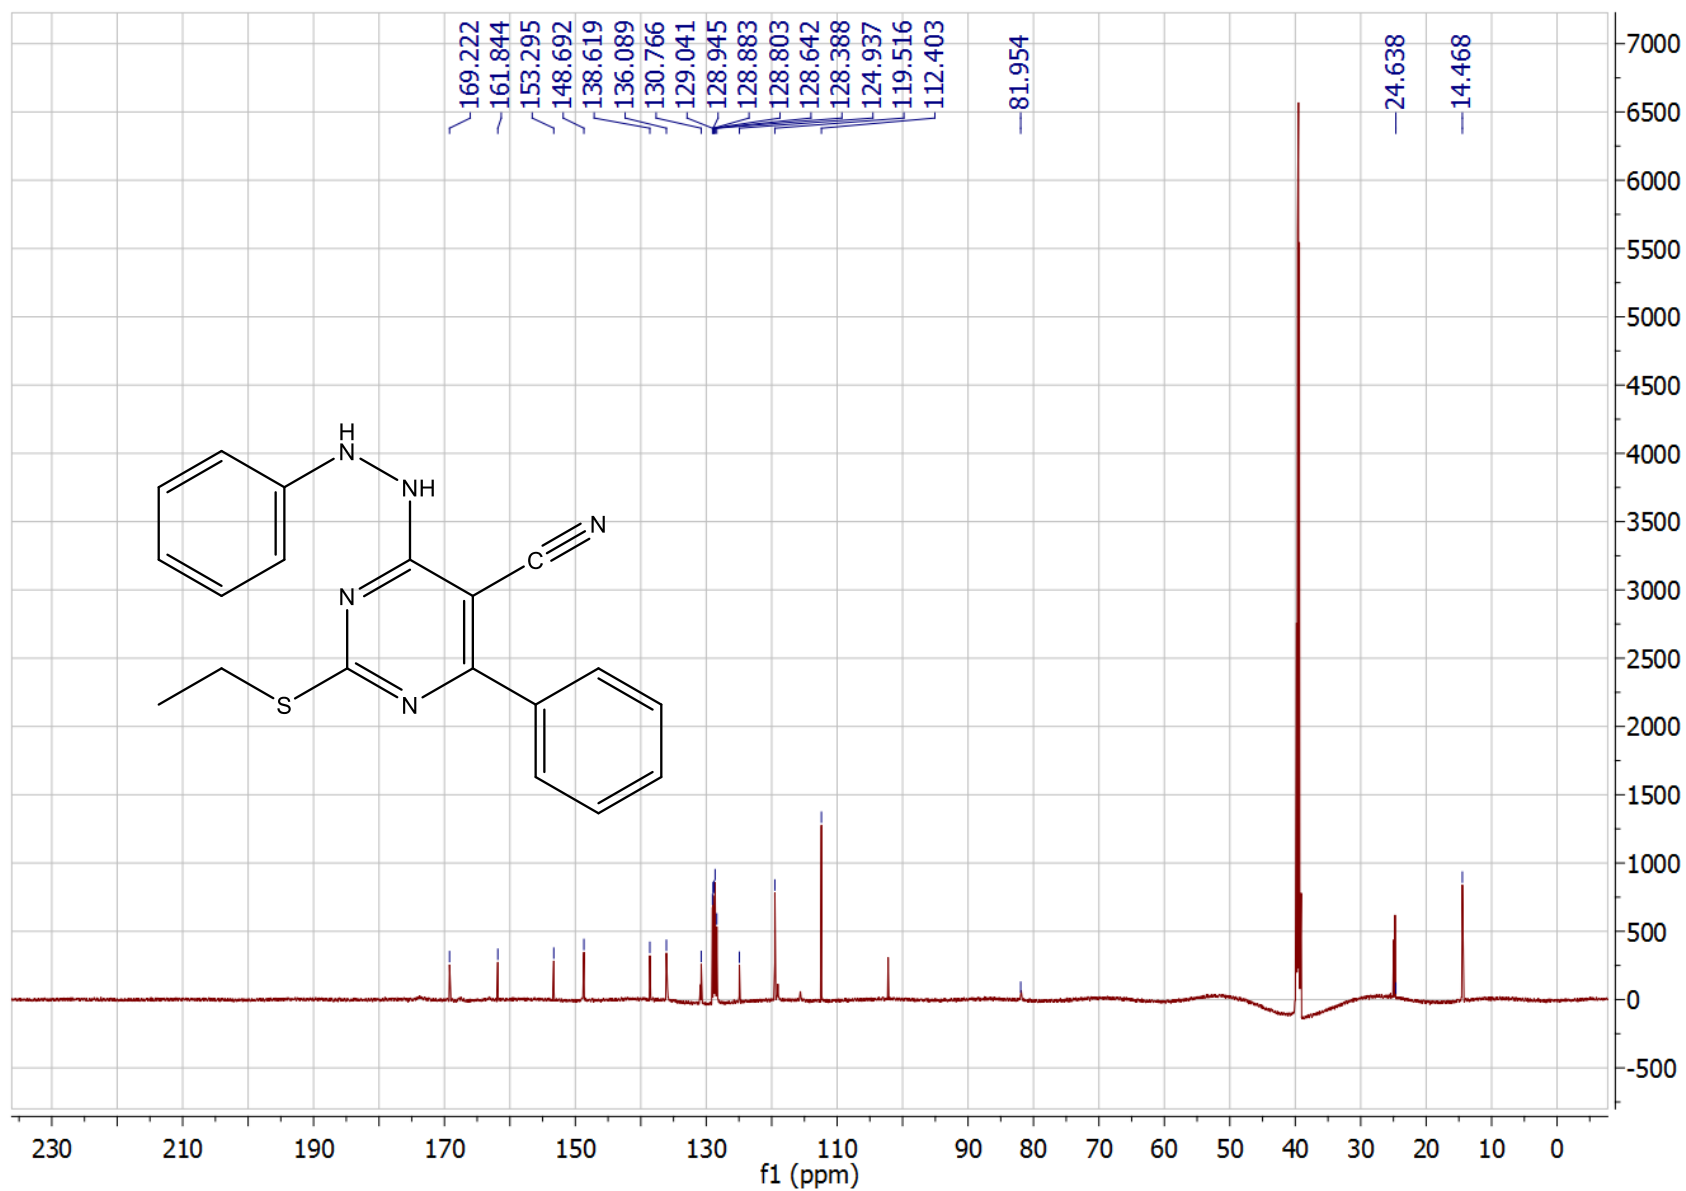

APT of compound 18<sub>a</sub>

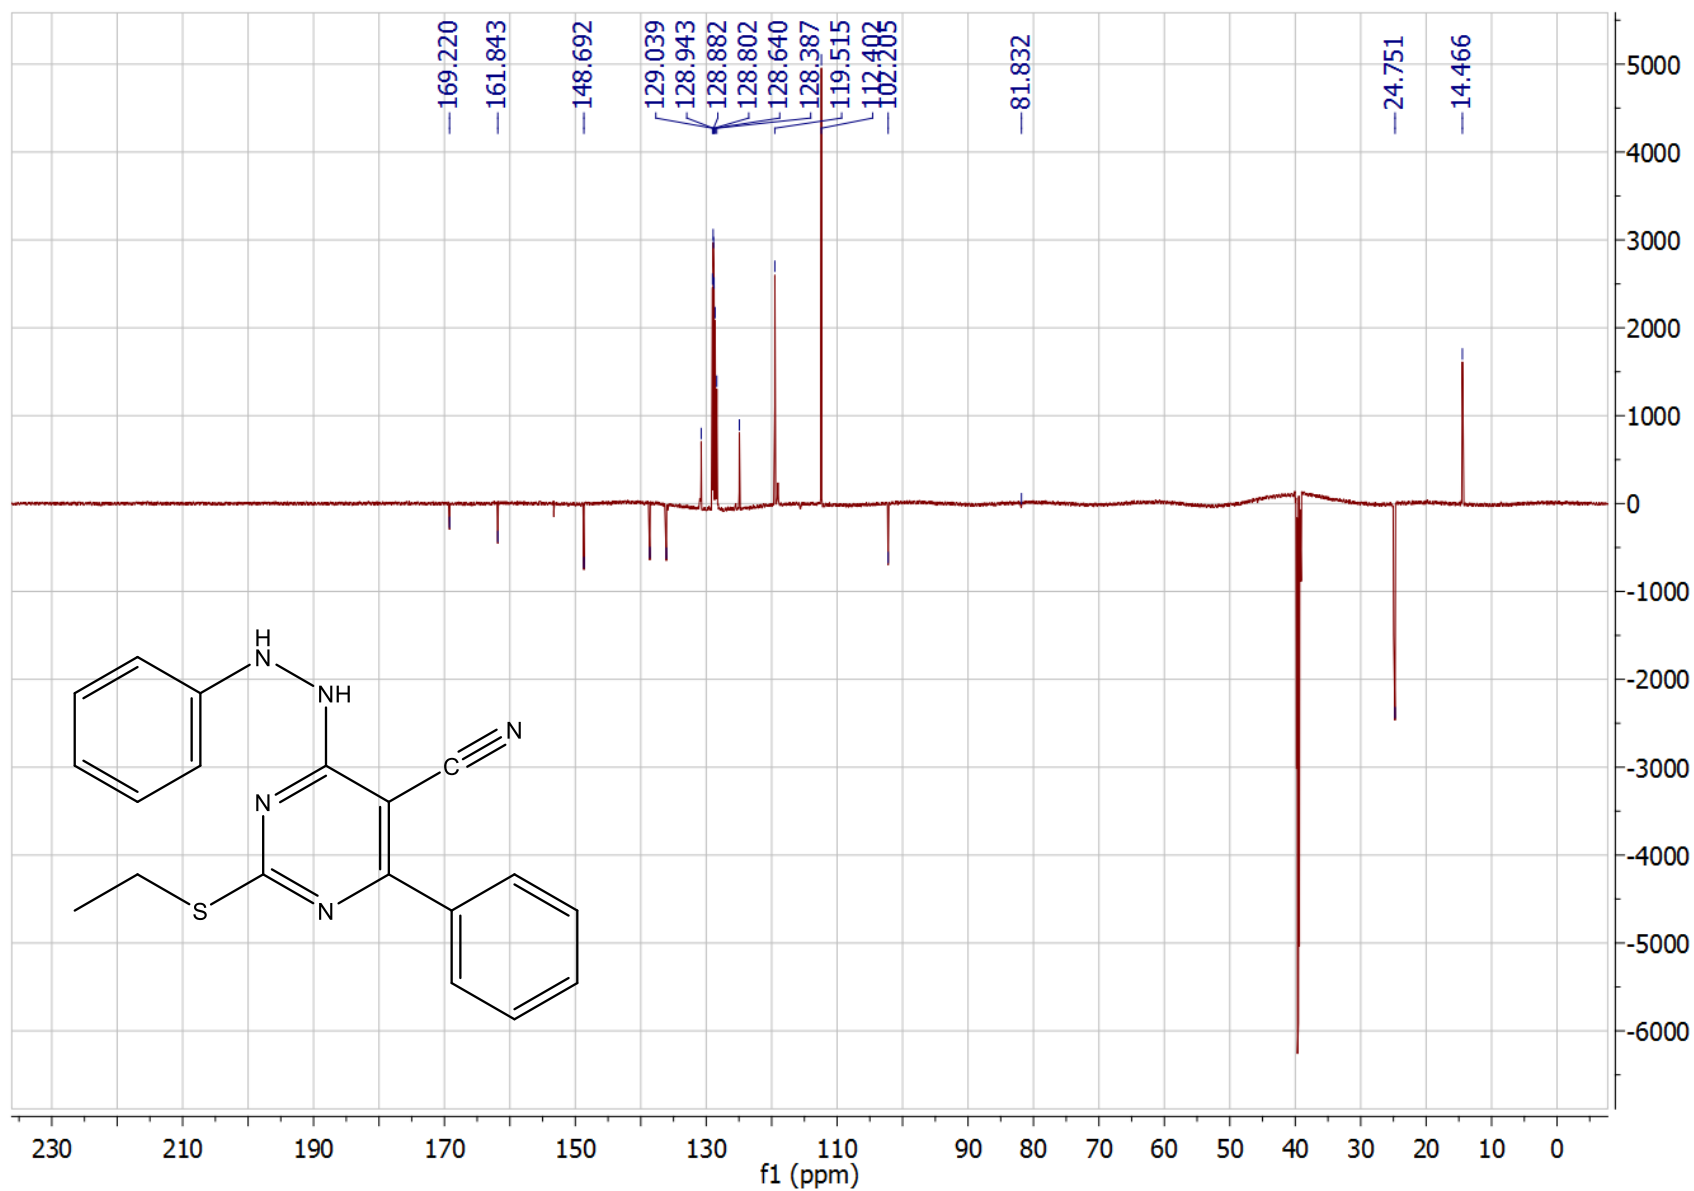

<sup>1</sup>H NMR of compound 18b

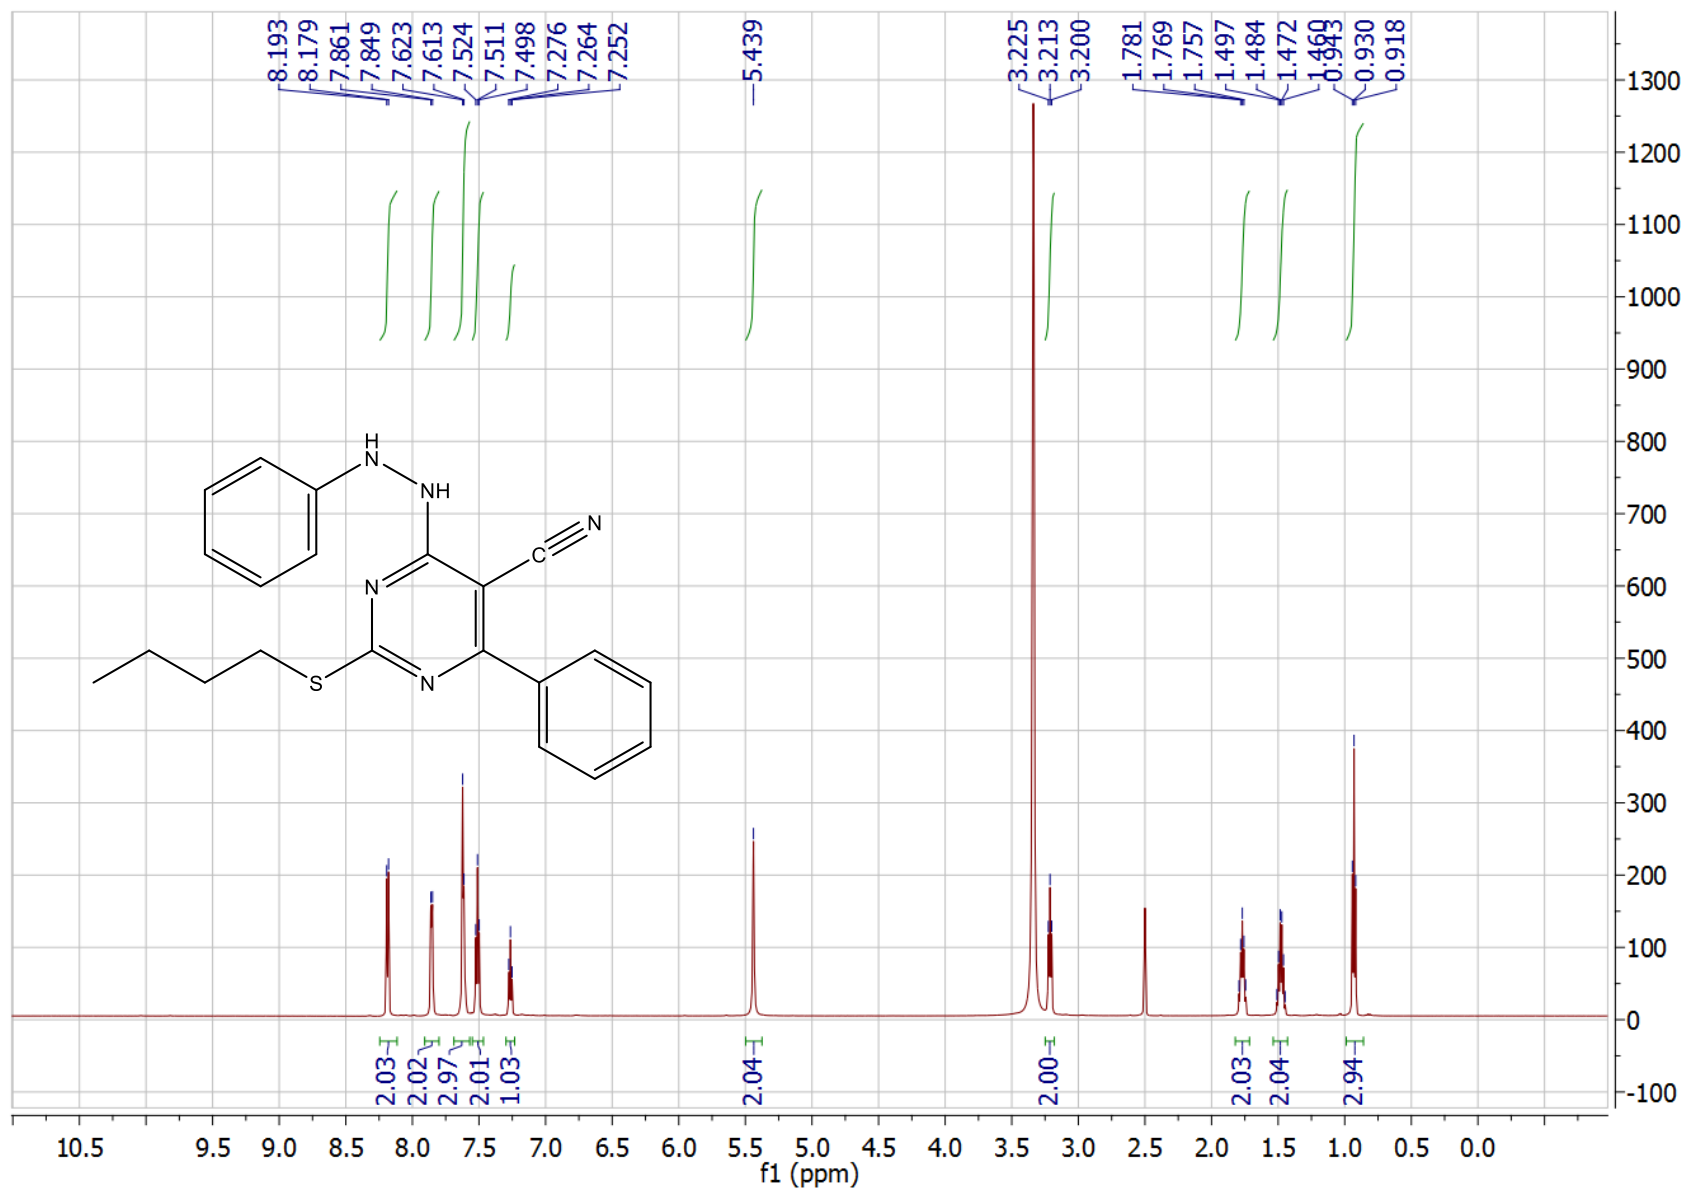

<sup>1</sup>H NMR of compound 18<sub>b</sub>

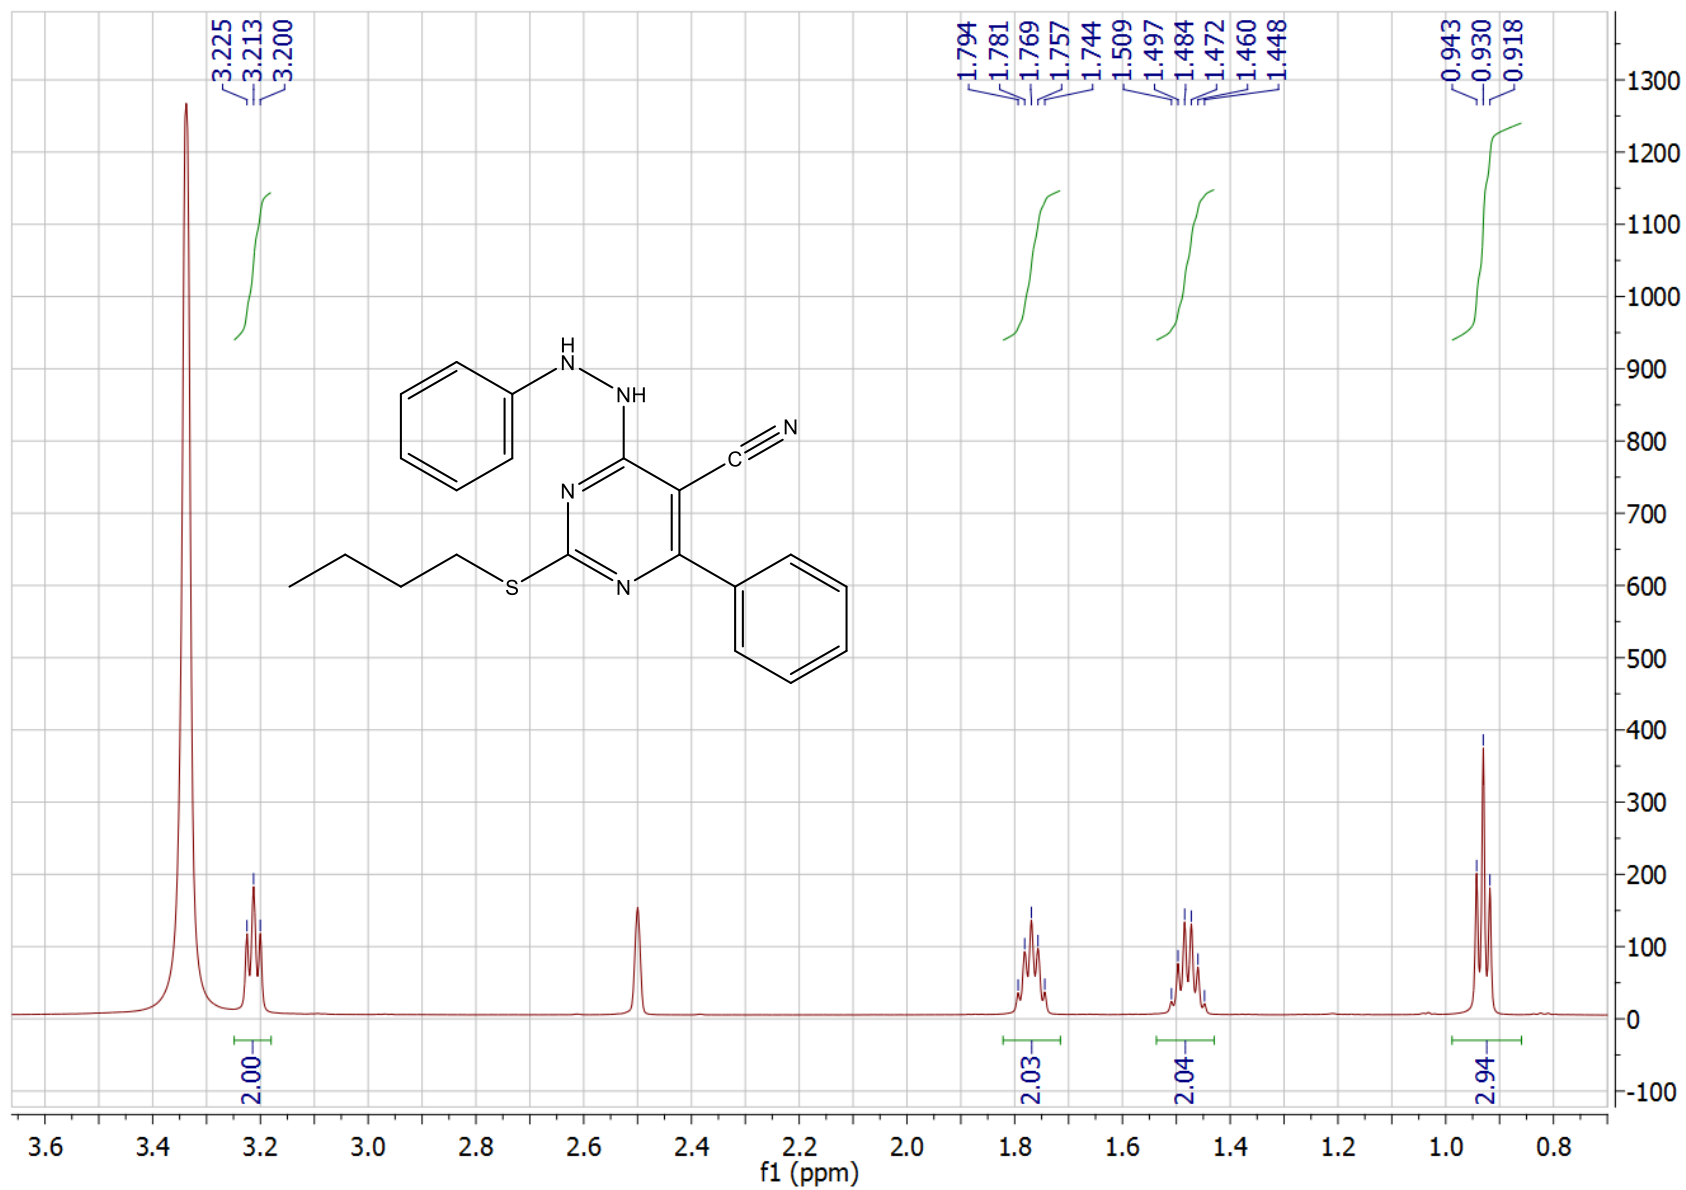

**<sup>1</sup>H NMR of compound 18<sub>b</sub>**

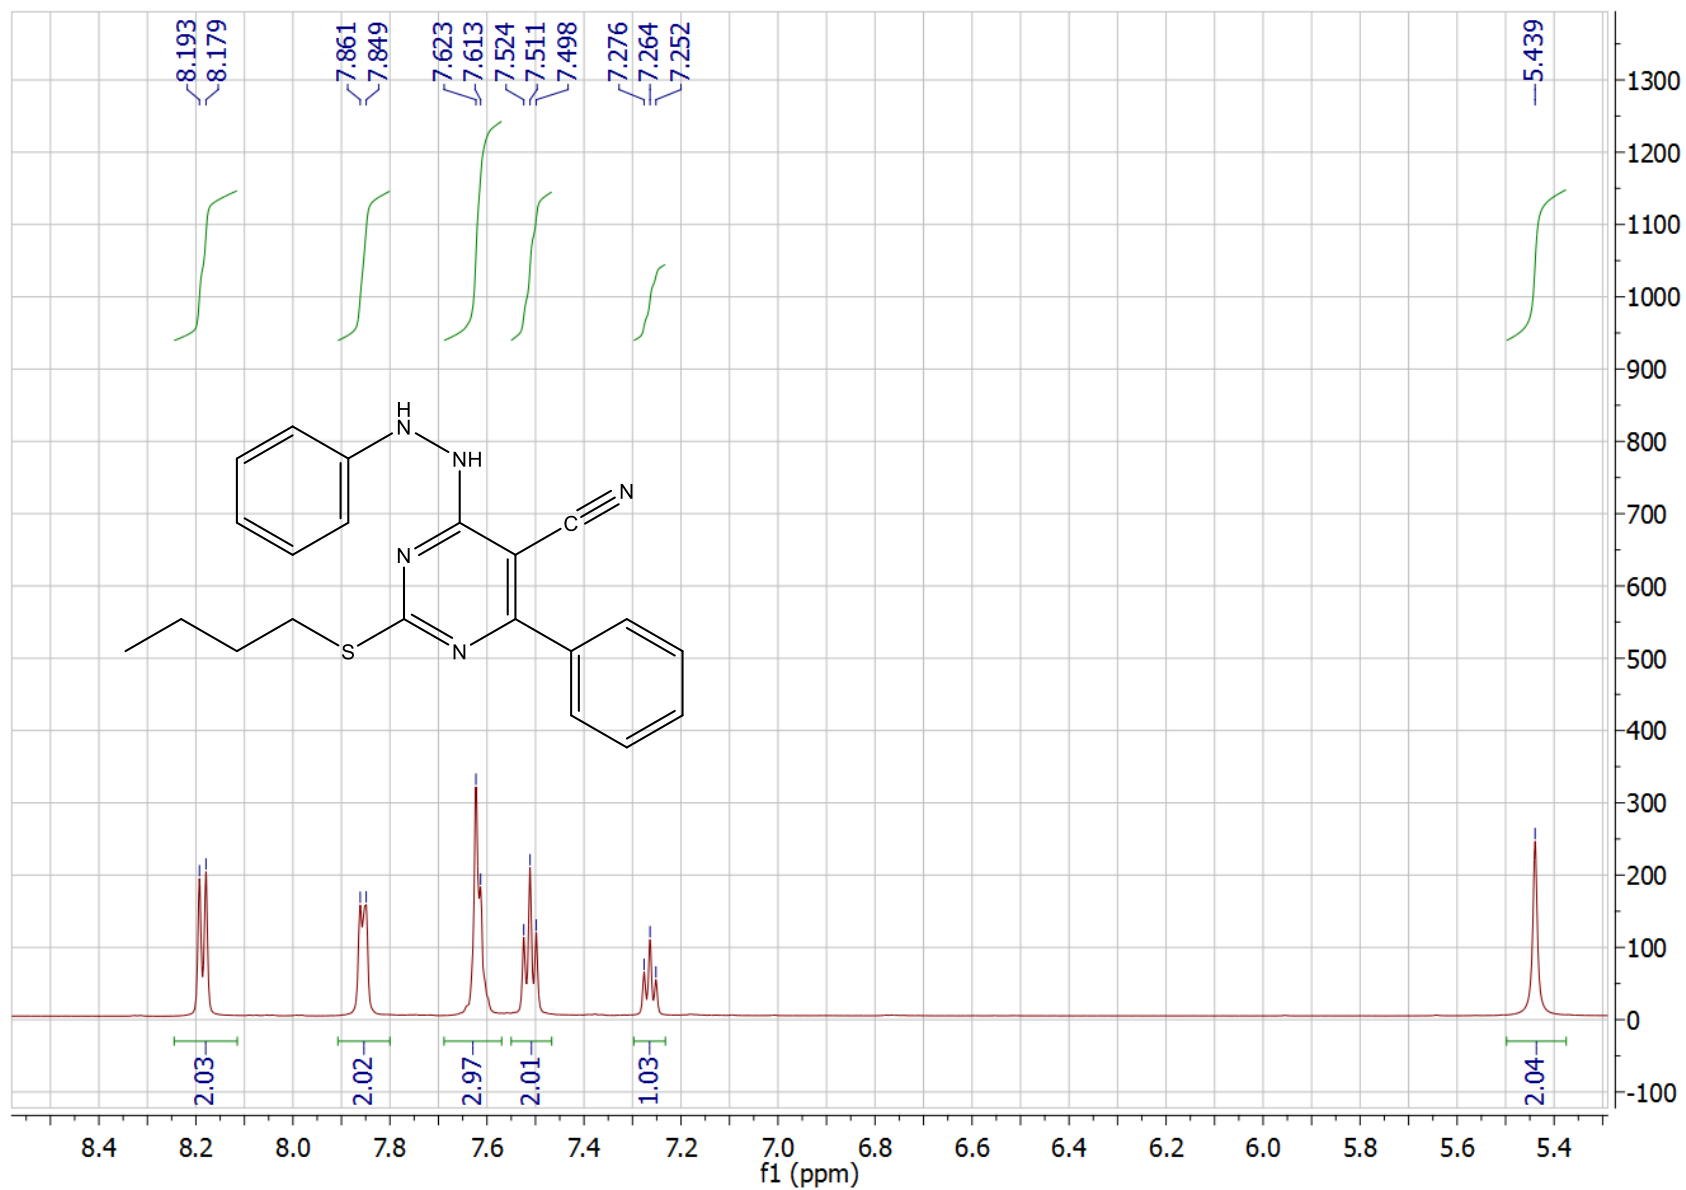

**<sup>13</sup>C NMR of compound 18<sub>b</sub>**

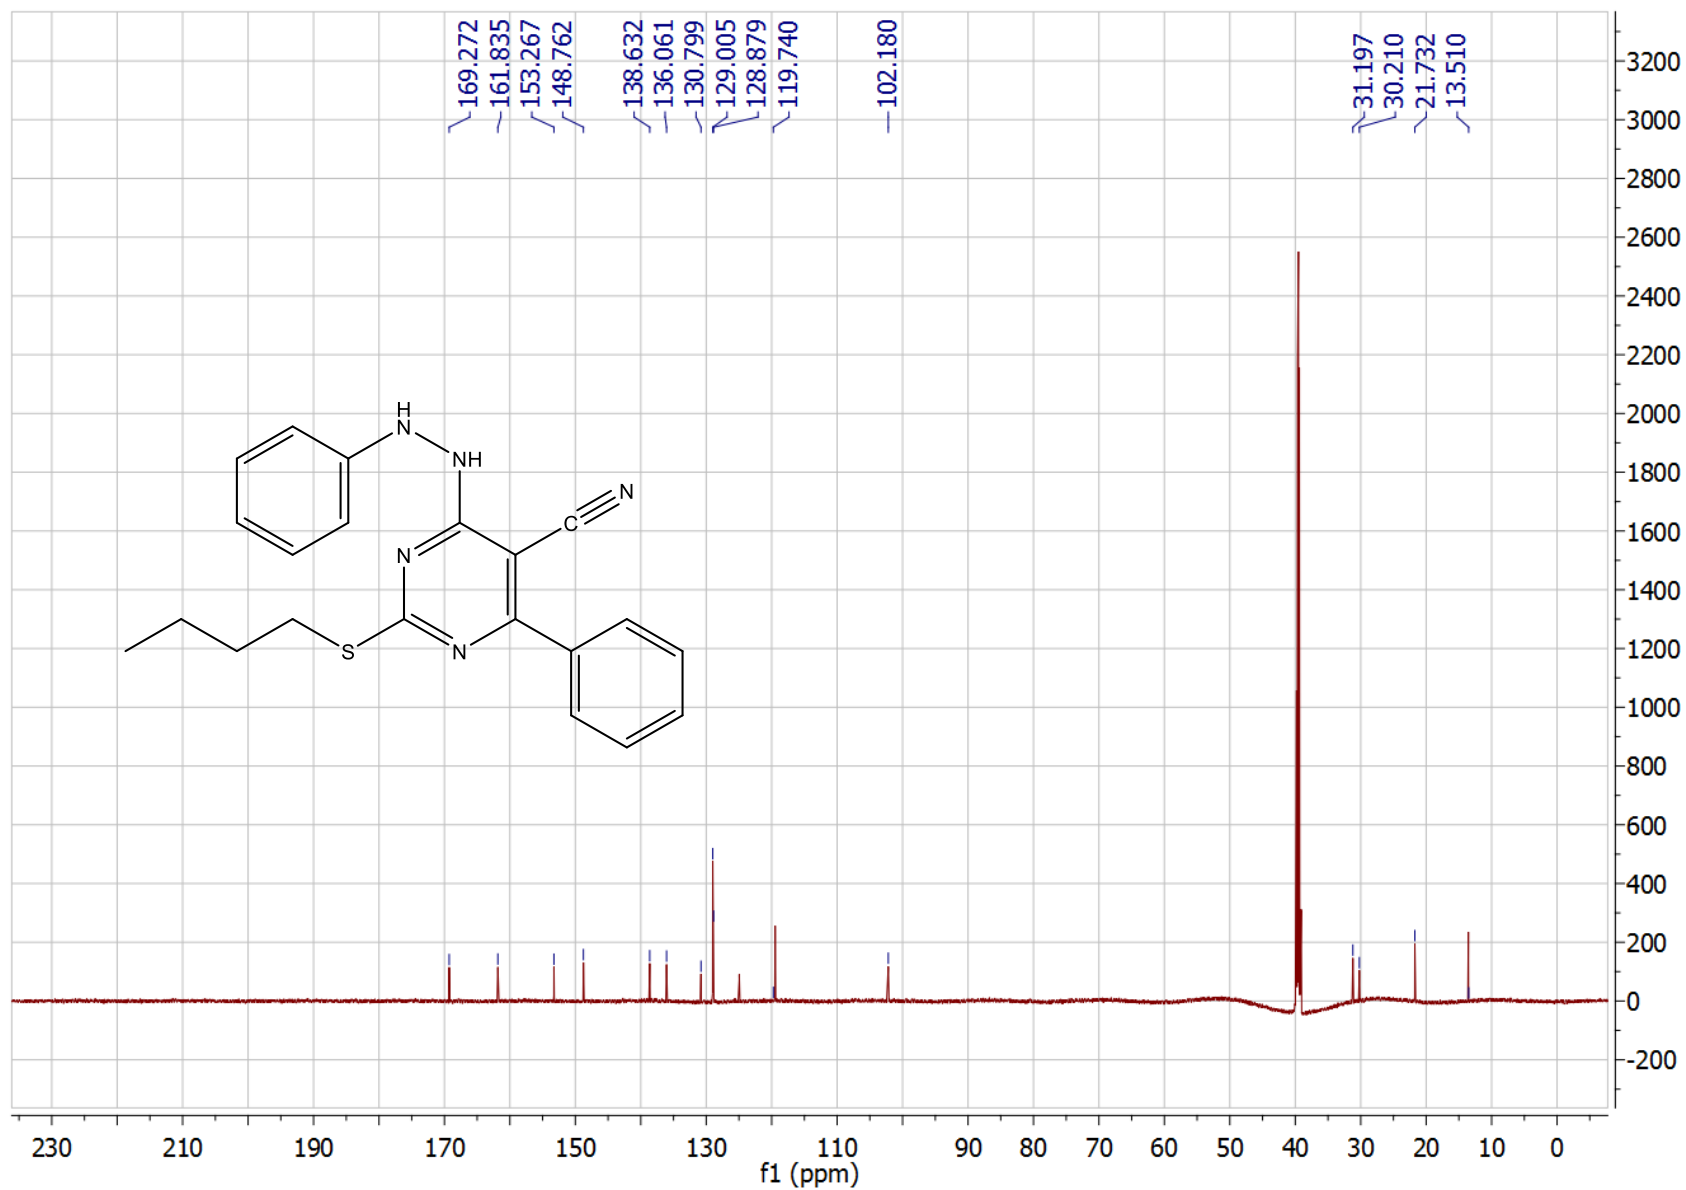

APT of compound 18<sub>b</sub>

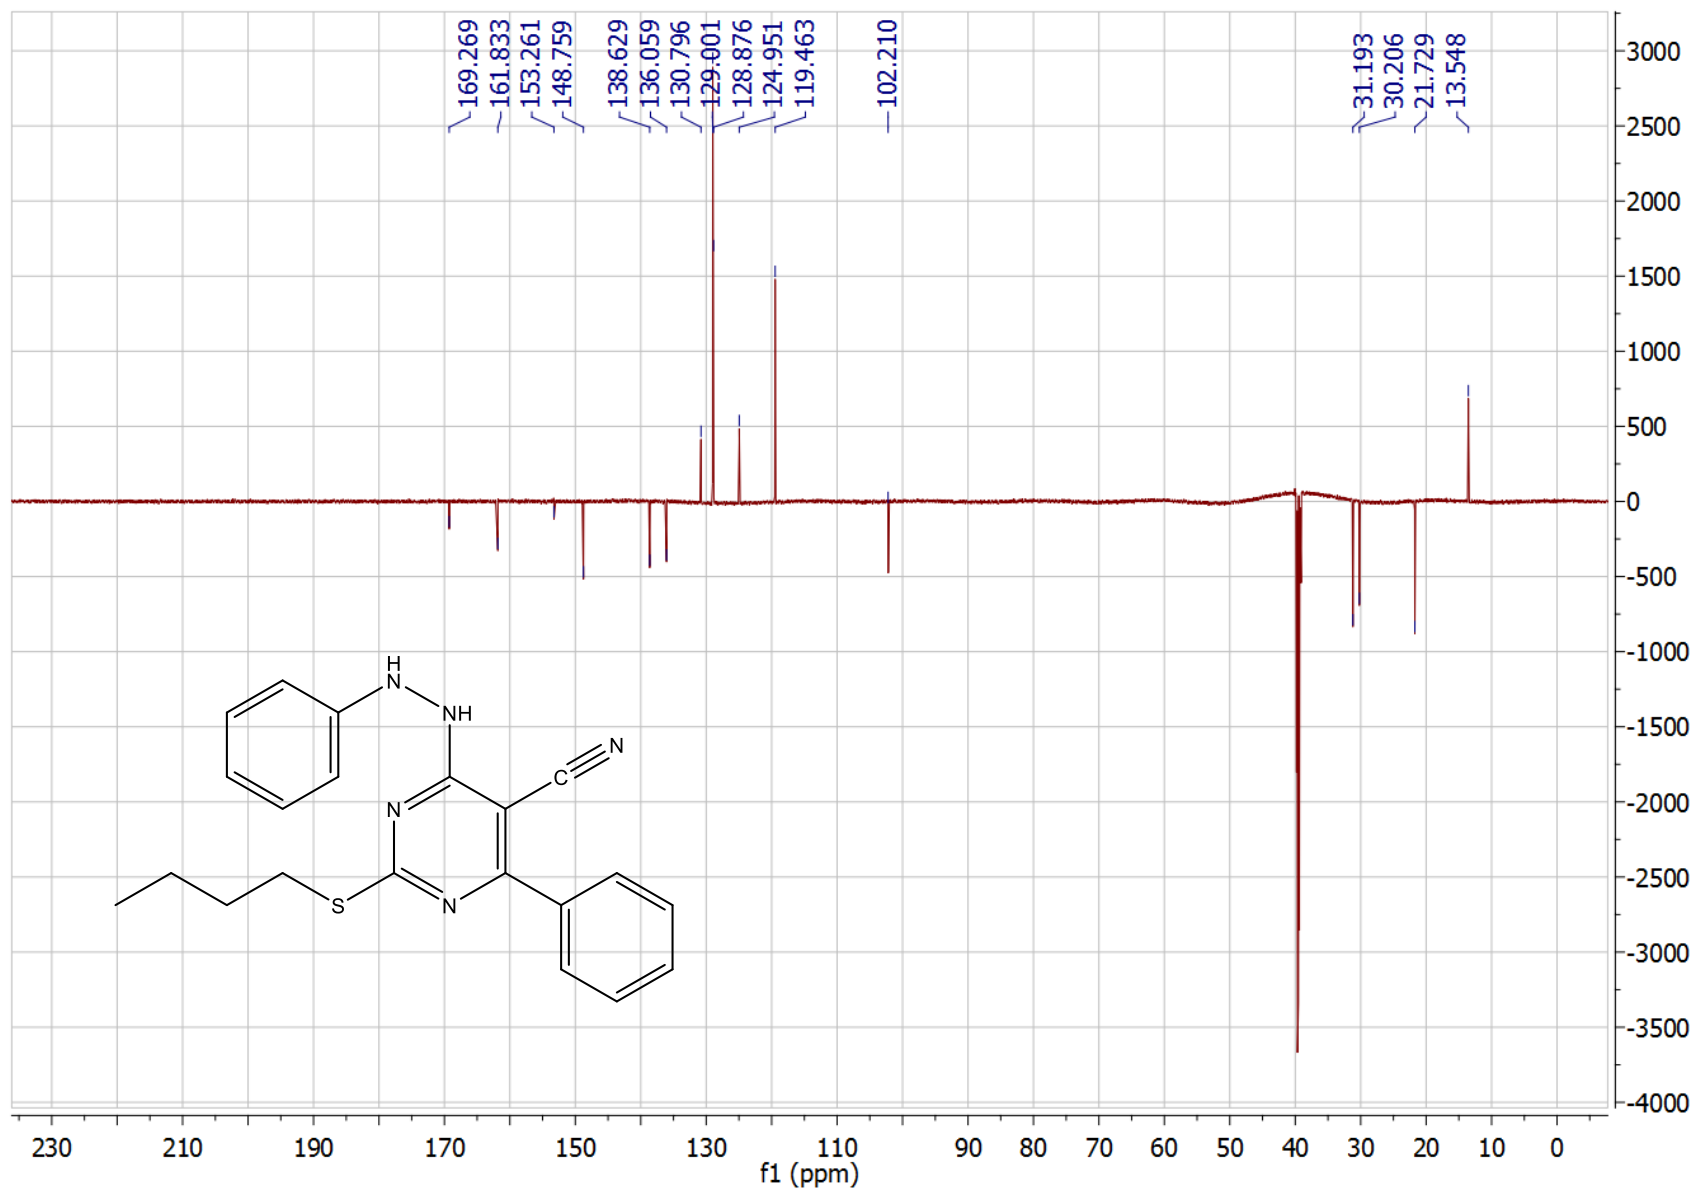



<sup>1</sup>H NMR of compound 19<sub>a</sub>

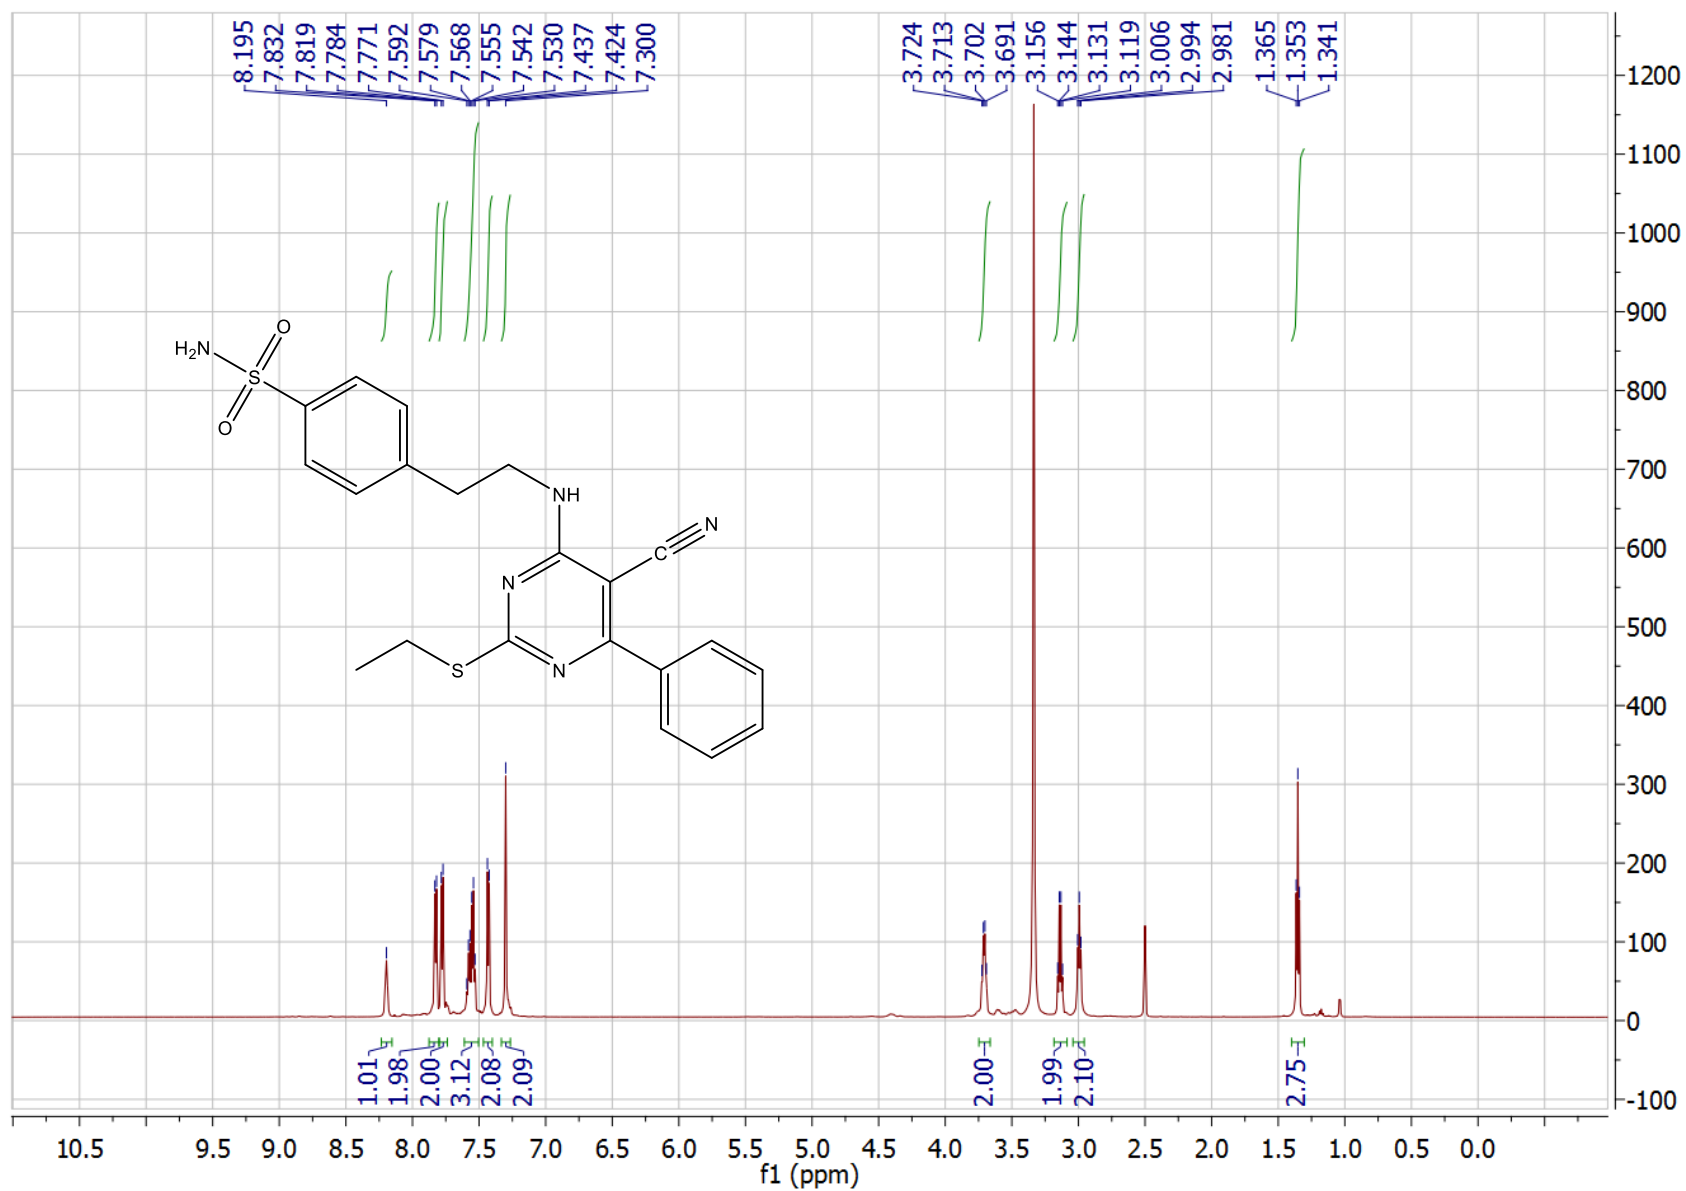

<sup>1</sup>H NMR of compound 19<sub>a</sub>

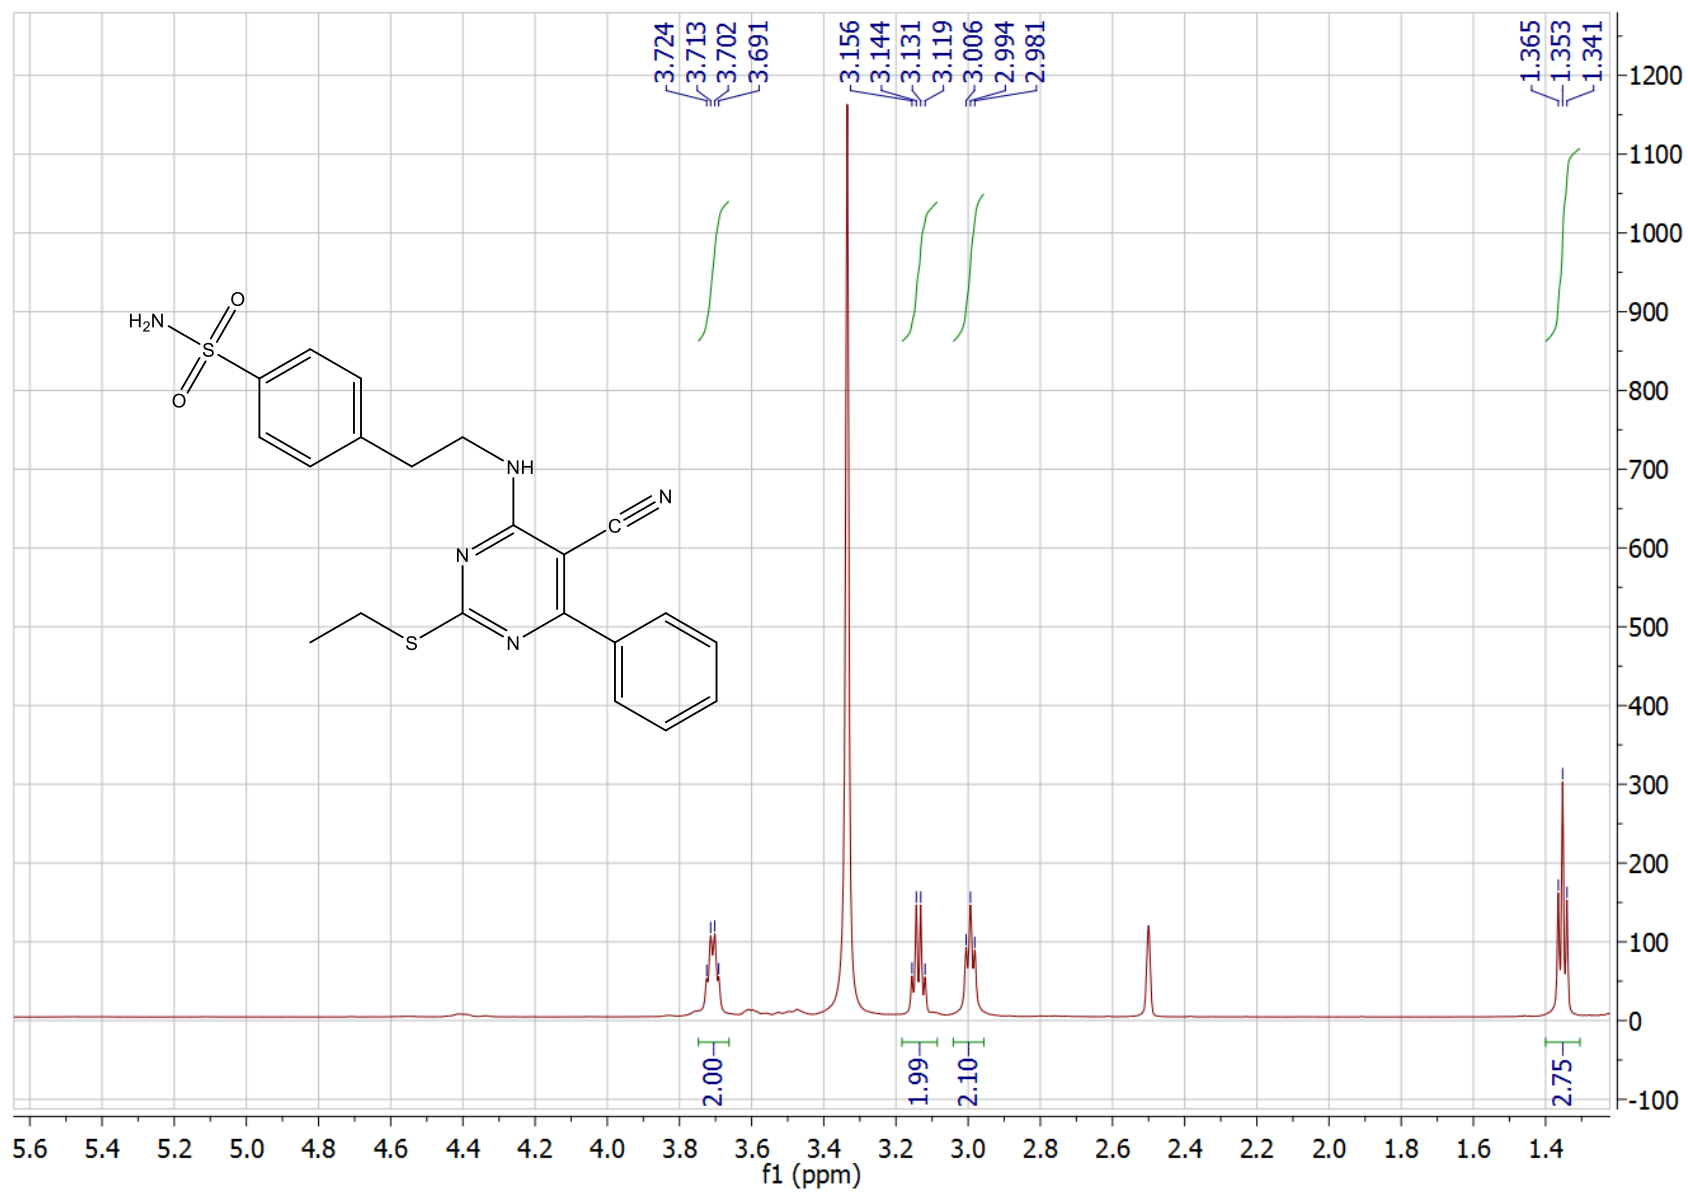

<sup>1</sup>H NMR of compound 19<sub>a</sub>

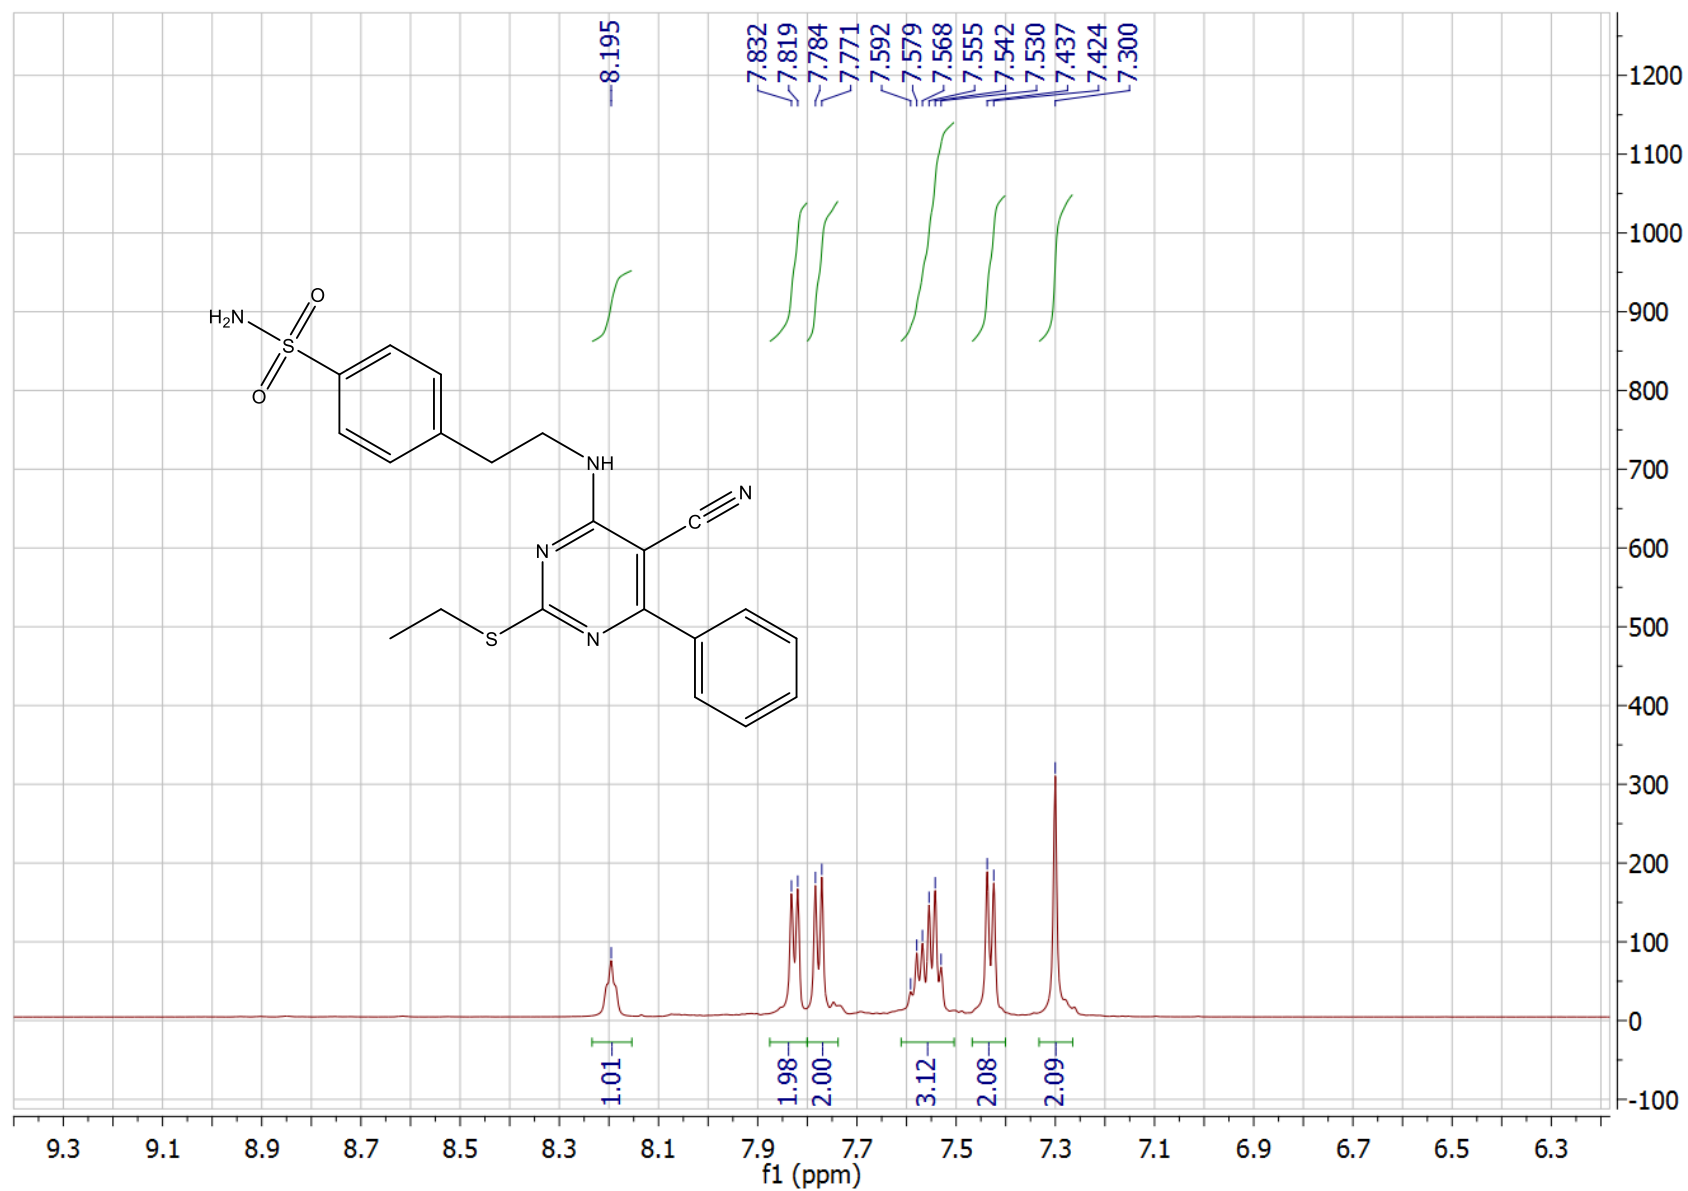

**<sup>13</sup>C NMR of compound 19<sub>a</sub>**

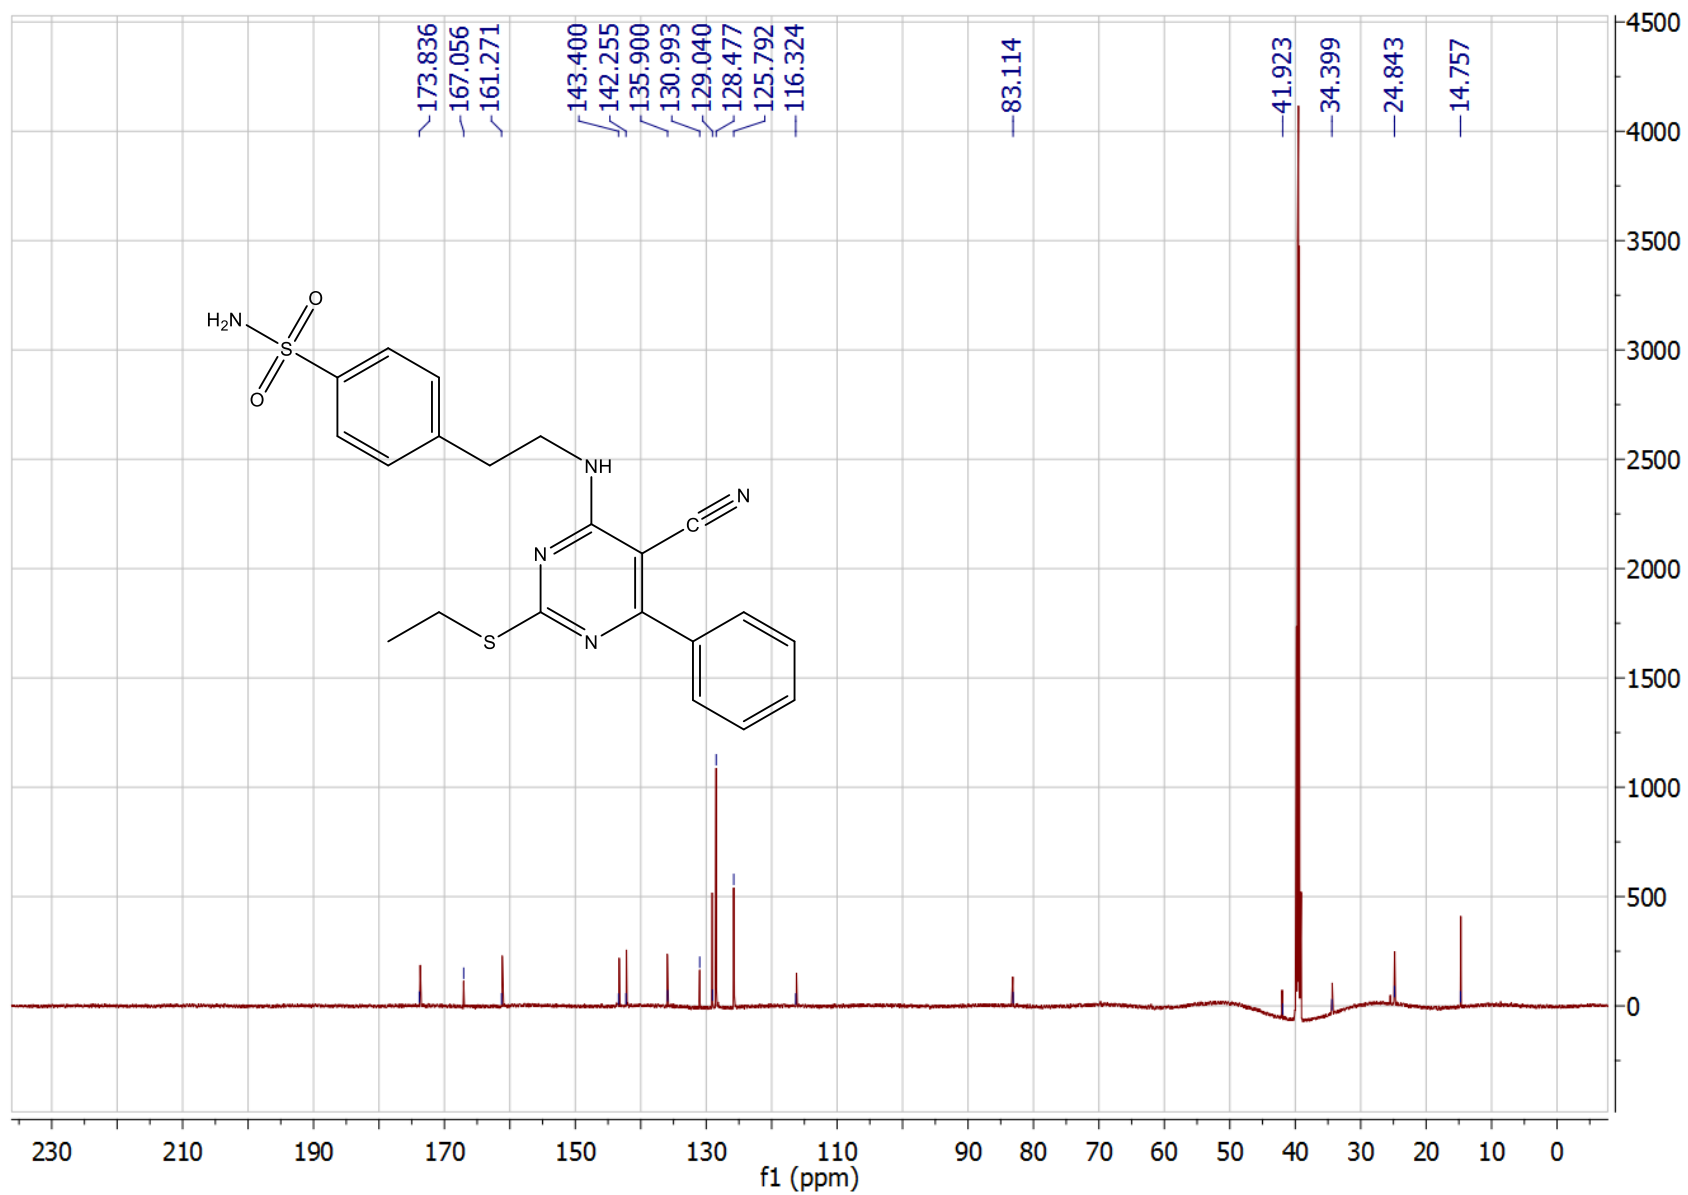

# APT of compound 19<sub>a</sub>

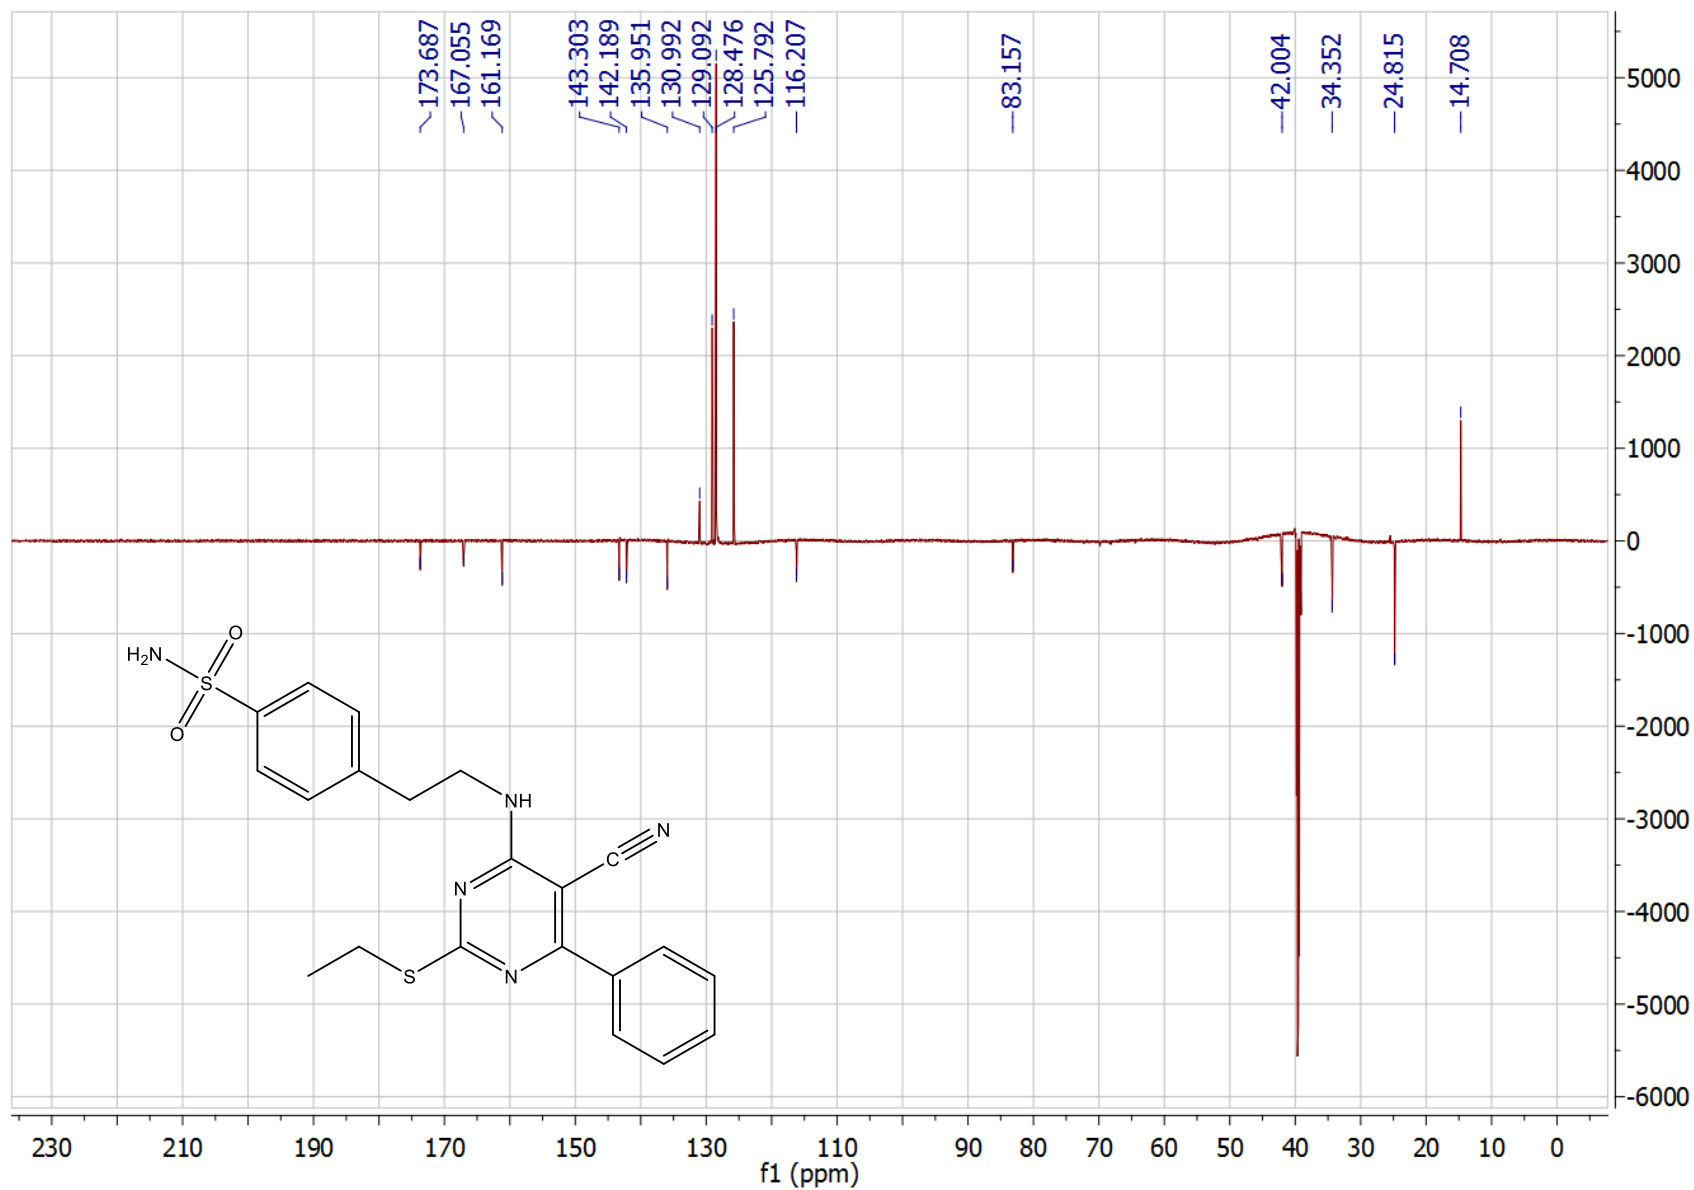

<sup>1</sup>H NMR of compound 19b

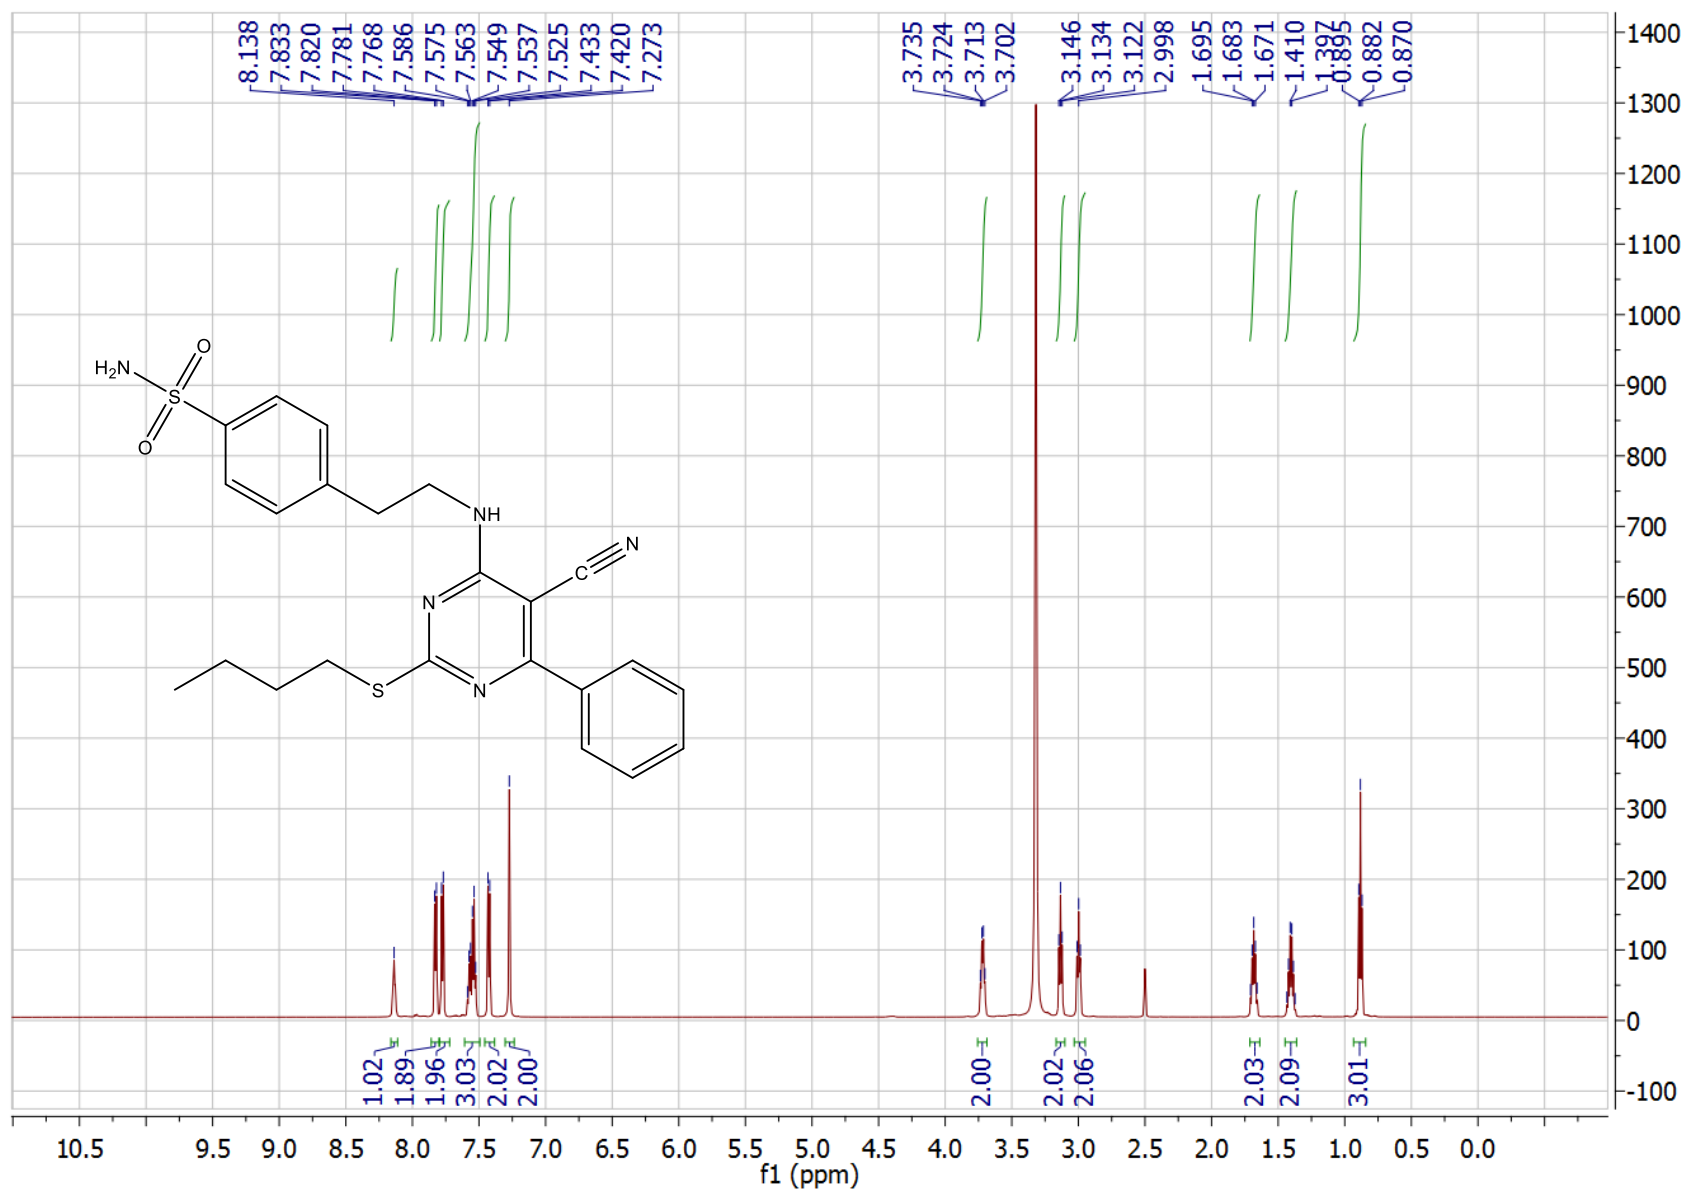

<sup>1</sup>H NMR of compound 19b

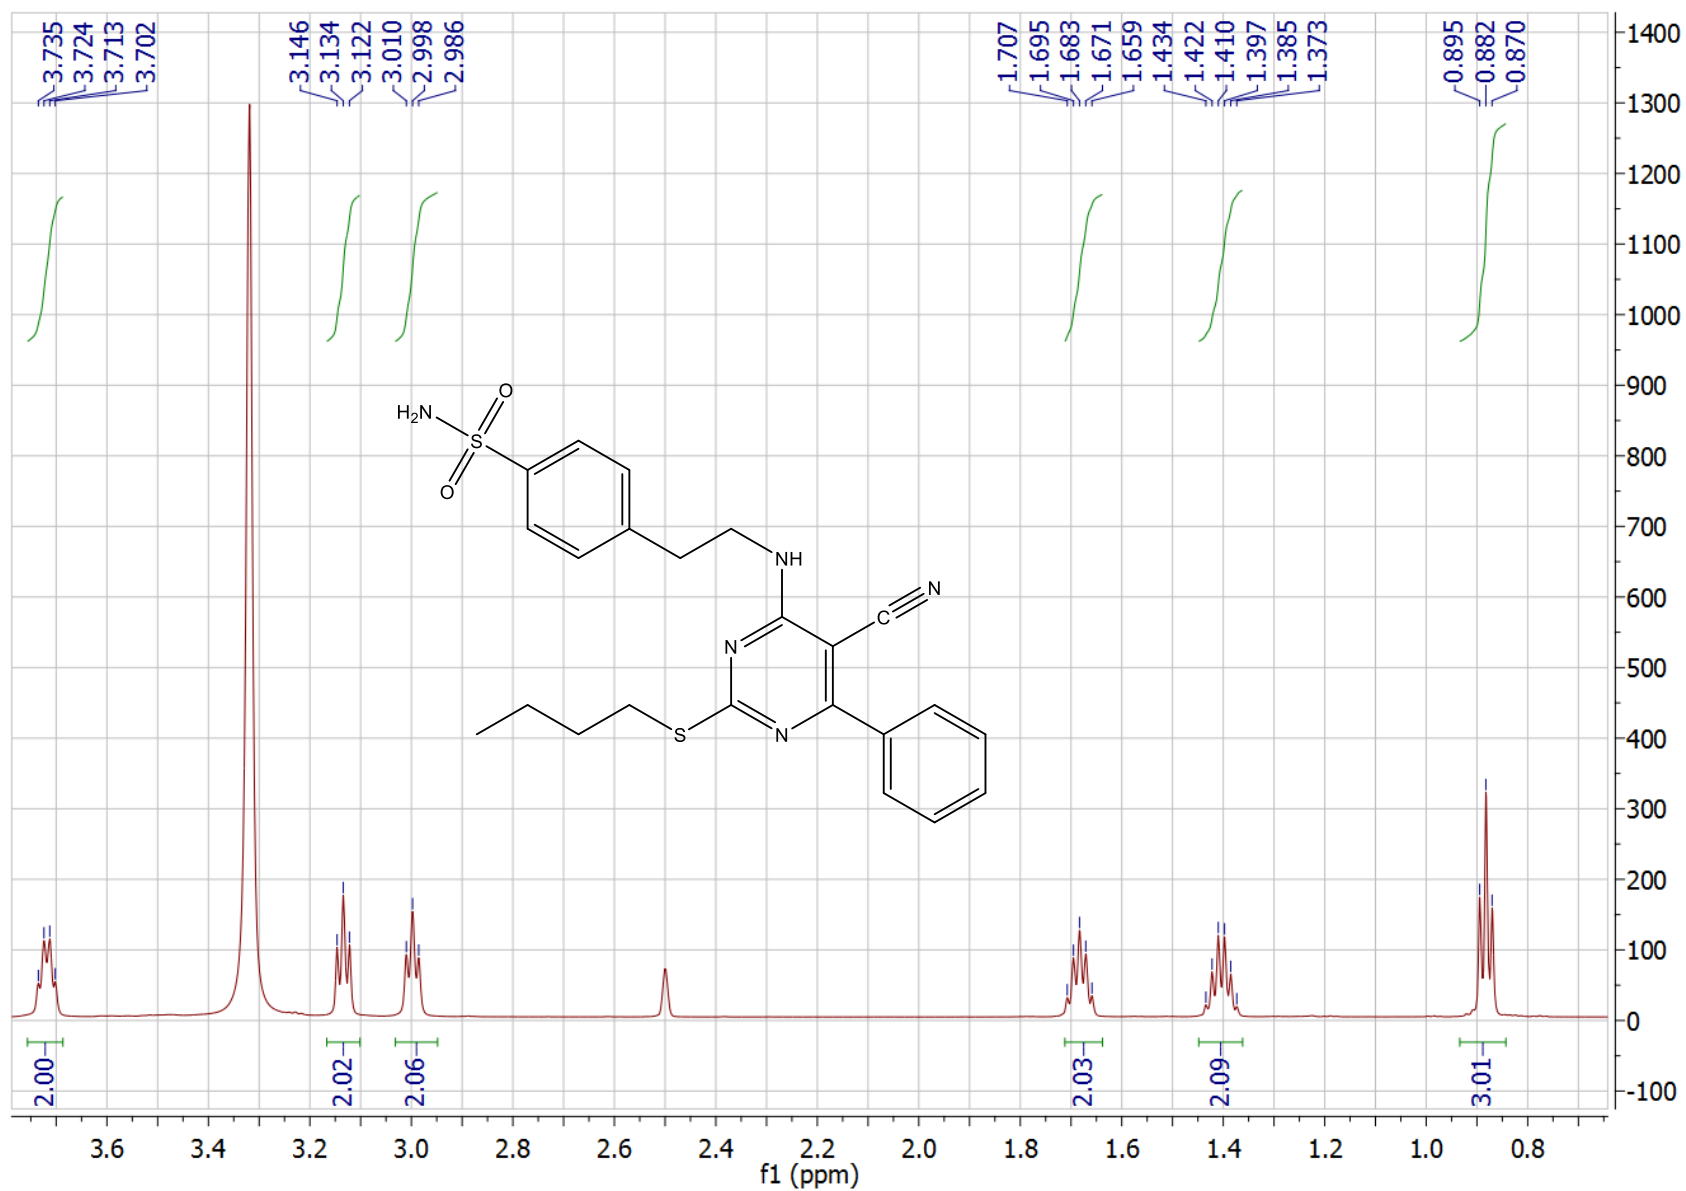

<sup>1</sup>H NMR of compound 19b

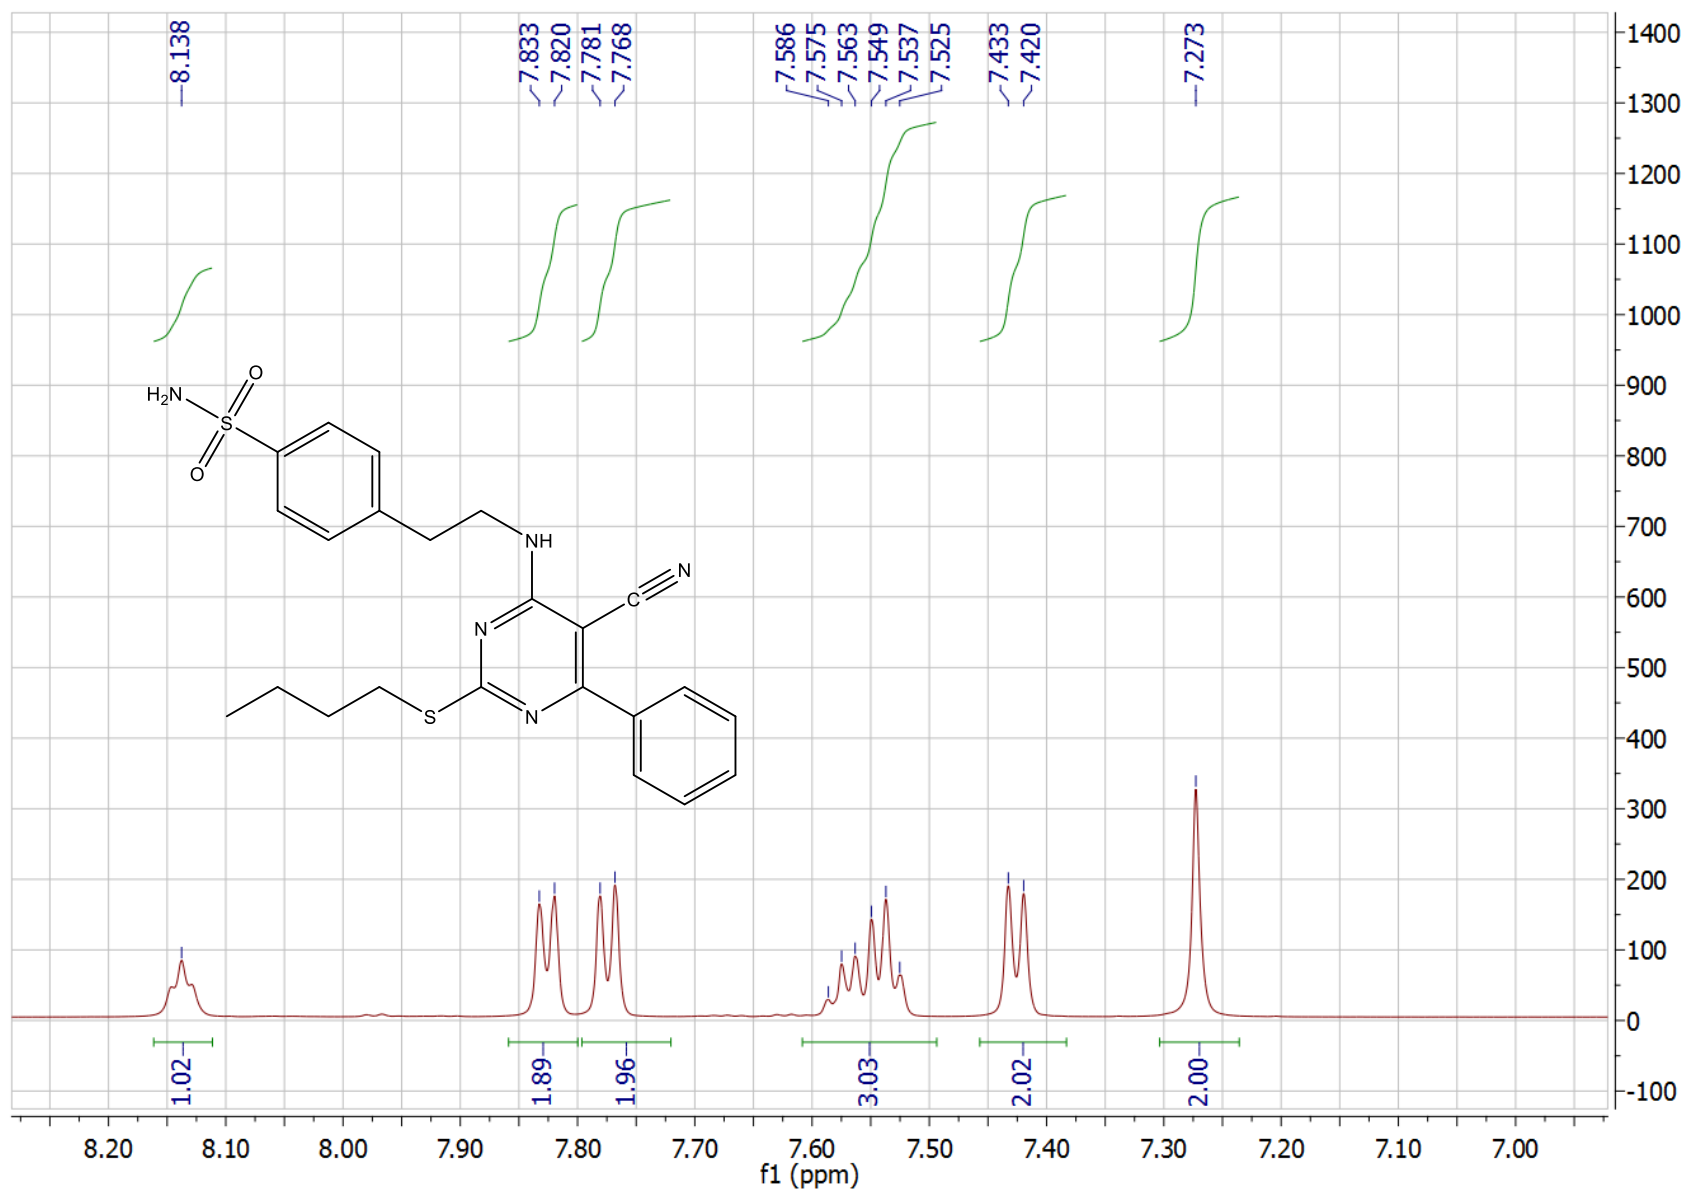



**<sup>13</sup>C NMR of compound 19b**

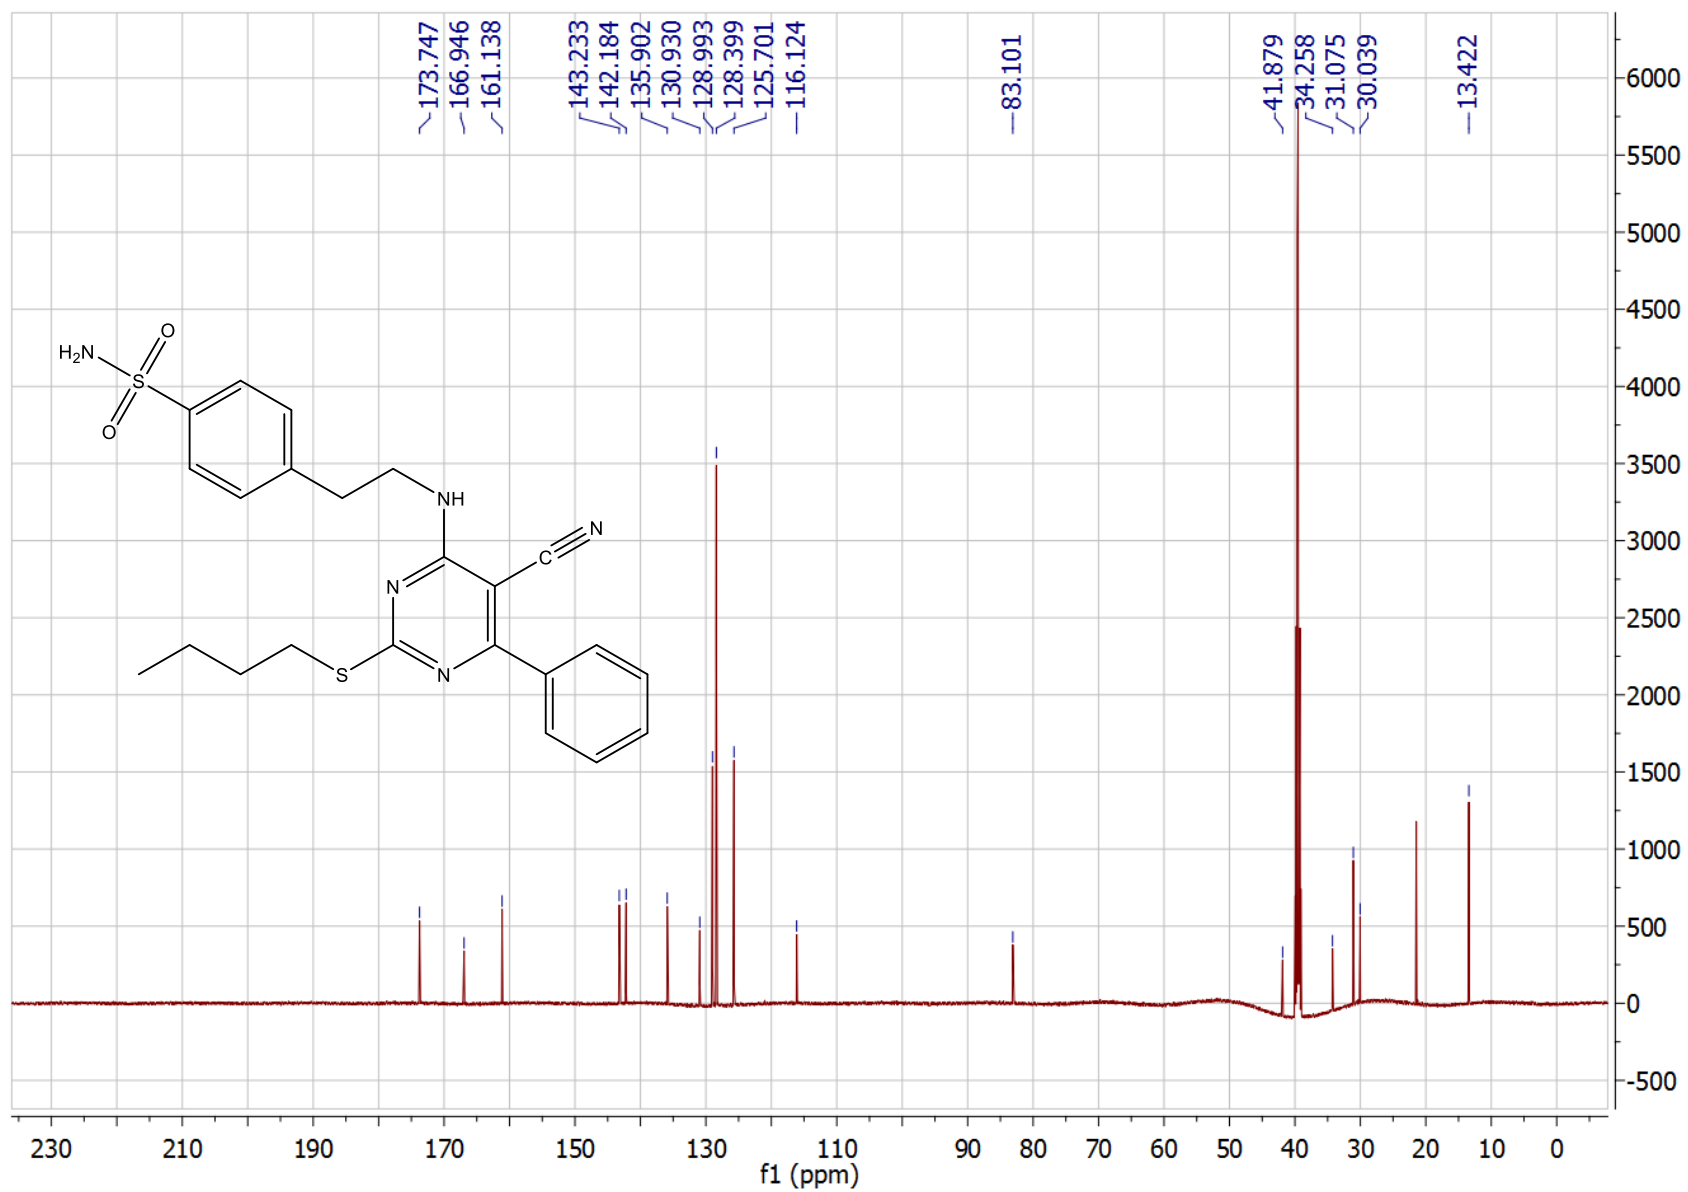

# APT of compound 19b

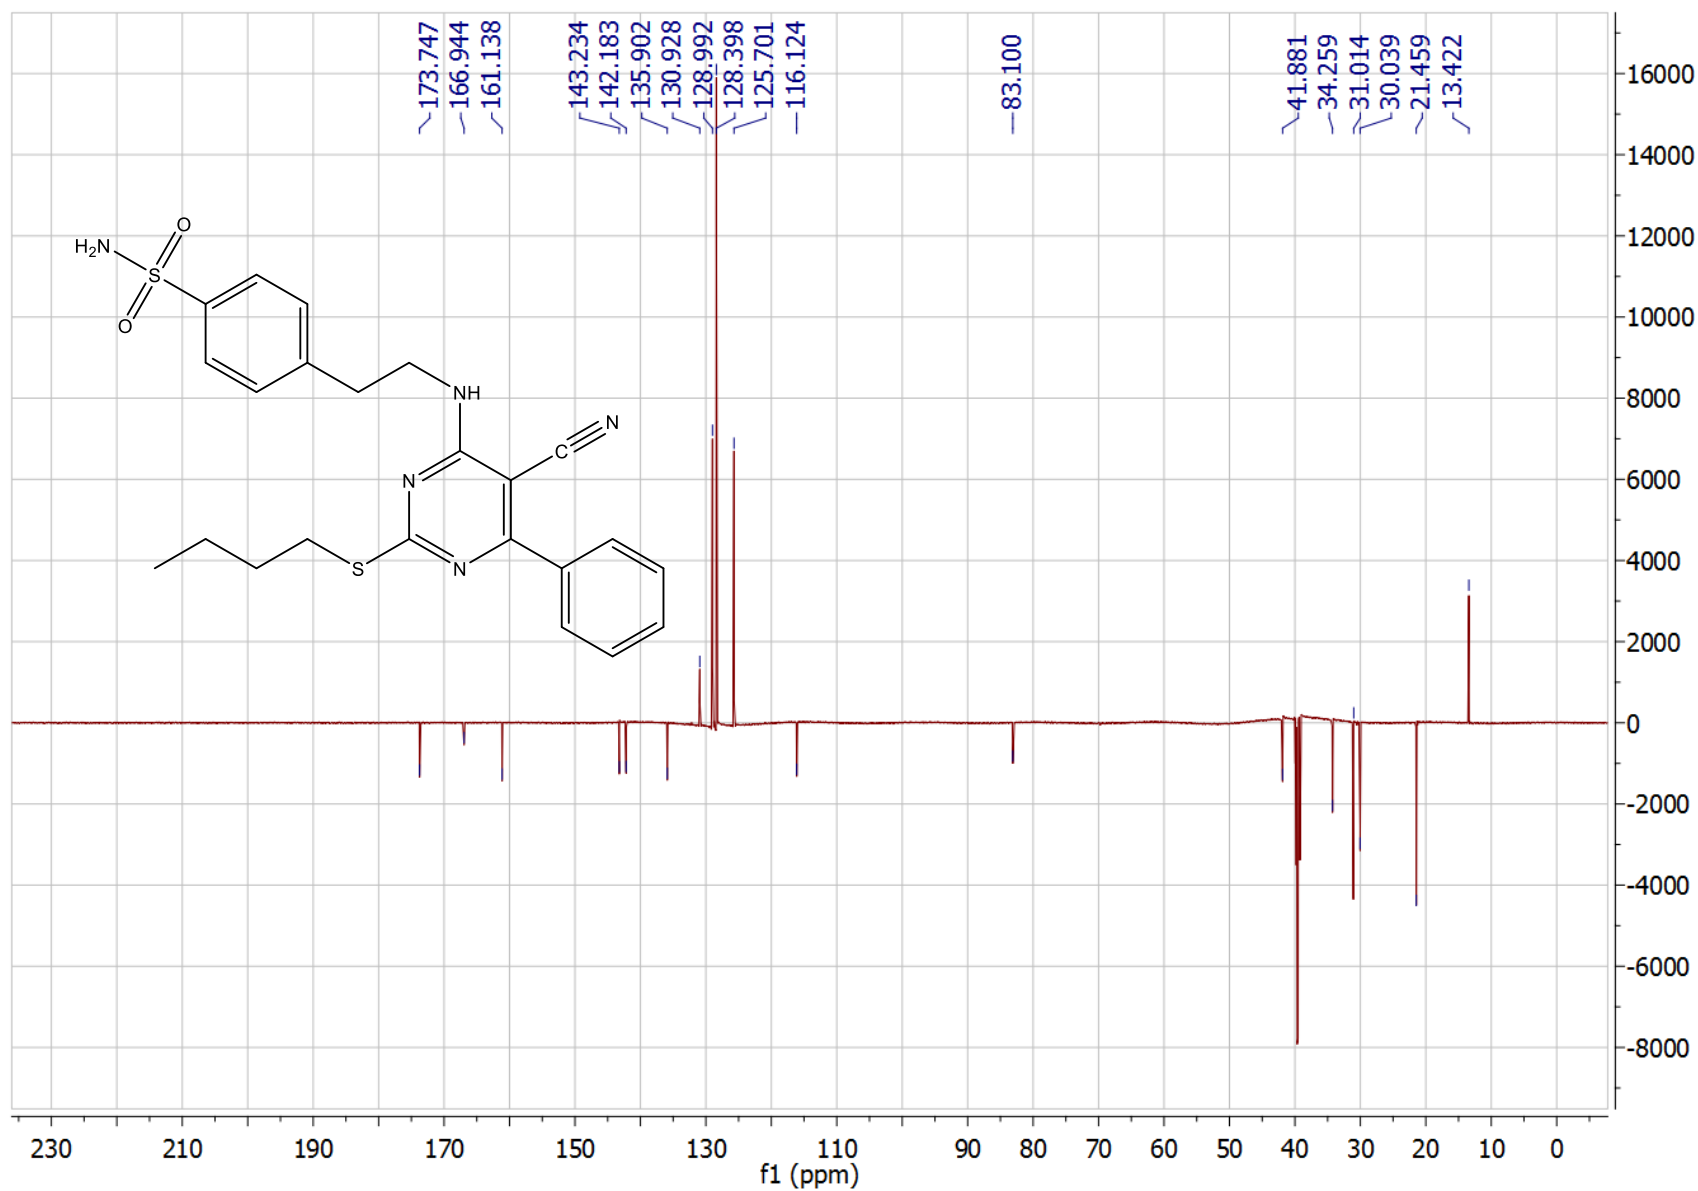

Supplement: d0ob01557a1.pdf [file d0ob01557a1.pdf]
